# Supplementary material for: Endometrial Proliferative Phase-Centered View on the Transcriptome Dynamics Across the Menstrual Cycle
Source: Preprints.org preprint supplement (doi:10.20944/preprints202404.0635.v1), 2024-04-09
Supplement: Supplementary file 1 [file supplementary]

## Sheet: MP vs LH
5_8S_rRNA	4.45026	4.50774	1.63106	2.76368	0.00571534	0.0298068
A1BG-AS1	6.61209	-1.6917	0.608378	-2.78067	0.00542462	0.0286017
A4GNT	4.05193	-2.71162	0.945003	-2.86943	0.00411214	0.0231343
ABCA12	161.89	1.62304	0.489672	3.31455	0.000917913	0.00687561
ABCA13	319.949	-1.49258	0.472308	-3.16018	0.00157672	0.0107149
ABCA9	293.715	-1.29855	0.283897	-4.57403	4.78435e-06	8.04653e-05
ABCD2	147.004	-1.69716	0.402022	-4.22156	2.42613e-05	0.000326479
ABHD11	203.959	1.13023	0.221237	5.1087	3.24388e-07	7.36079e-06
ABHD13	112.212	2.26709	0.21447	10.5707	4.07537e-26	1.42759e-23
ABHD17AP3	17.25	1.18977	0.39318	3.02603	0.00247785	0.0153881
ABHD17C	103.907	1.29644	0.182294	7.11183	1.14515e-12	7.50673e-11
ABI3BP	3295.93	-1.43868	0.410441	-3.5052	0.000456267	0.00388494
ABRA	16.9797	-1.24204	0.44485	-2.79204	0.00523766	0.027832
ACACA	60.9212	1.50167	0.418577	3.58755	0.000333802	0.00298862
ACE	1374.47	1.01647	0.310366	3.27507	0.00105637	0.00767173
ACHE	21.9605	-1.33296	0.413598	-3.22283	0.00126929	0.00893725
ACOT1	93.489	1.23679	0.327708	3.77405	0.000160617	0.00164396
ACP3	204.08	1.37486	0.397575	3.45813	0.000543942	0.00449821
ACP4	27.0714	-1.05402	0.407875	-2.58418	0.00976112	0.0450926
ACRV1	23.8694	1.61872	0.560746	2.88672	0.0038928	0.0220943
ACSBG2	28.2633	-1.23171	0.406598	-3.02929	0.00245127	0.015261
ACSM1	65.6075	1.10161	0.336217	3.27649	0.00105104	0.00764052
ACSM3	444.679	1.23321	0.365927	3.37011	0.000751384	0.00582801
ACTG1P1	43.3489	1.50749	0.326943	4.61085	4.01025e-06	6.87353e-05
ACTG1P20	51.5954	1.42337	0.341666	4.16598	3.10016e-05	0.000403849
ACTG1P25	6.57772	3.38049	0.905879	3.73172	0.000190176	0.00187739
ACTG1P3	34.4106	1.81355	0.380145	4.77069	1.83598e-06	3.456e-05
ADAM19	472.435	-1.32005	0.330492	-3.99419	6.49158e-05	0.000766375
ADAMDEC1	23.1066	-1.32192	0.510129	-2.59135	0.00956007	0.044365
ADAMTS1	1125.21	-1.10499	0.380178	-2.90649	0.00365505	0.0210487
ADAMTS18	105.884	1.22779	0.474349	2.58836	0.00964338	0.0446869
ADAMTS20	58.0618	2.62749	0.612653	4.28871	1.79713e-05	0.000252759
ADAMTS8	229.791	2.83902	0.801718	3.54117	0.000398356	0.00346825
ADAP1	90.24	-1.1356	0.27673	-4.10366	4.06674e-05	0.000511055
ADGRE2	206.762	-1.55339	0.512938	-3.02842	0.00245838	0.0152968
ADGRG2	700.163	2.14993	0.499288	4.30599	1.66244e-05	0.000236636
ADGRG3	38.983	-1.40178	0.430261	-3.25799	0.00112206	0.00806522
ADH1A	235.941	1.07116	0.290832	3.68308	0.000230435	0.00219398
ADH1C	120.902	-1.14505	0.370123	-3.0937	0.00197679	0.0129055
ADH4	74.0831	1.1506	0.310398	3.70686	0.000209849	0.00203398
ADH5	2512.13	1.39081	0.166008	8.37798	5.38441e-17	6.38694e-15
ADH6	171.337	1.07983	0.287125	3.76084	0.000169342	0.00171475
ADI1	80.0257	1.17243	0.191395	6.12571	9.02829e-10	3.64038e-08
ADM	31.9266	-1.59452	0.487907	-3.26808	0.00108281	0.00783334
ADNP2	346.126	1.56083	0.118997	13.1166	2.64458e-39	3.70555e-36
ADO	24.8988	1.95451	0.408854	4.78045	1.74899e-06	3.30613e-05
ADRA2A	152.375	-1.89095	0.564276	-3.35111	0.000804881	0.00618178
AFDN-DT	166.927	1.34117	0.386761	3.4677	0.000524939	0.00437008
AIFM3	25.7008	-1.27383	0.298328	-4.26989	1.95567e-05	0.000272154
AJUBA	316.176	-1.19549	0.268288	-4.45598	8.35089e-06	0.000130375
AKAP11	3356.99	-1.11549	0.102776	-10.8536	1.91779e-27	7.67768e-25
AKR1C2	39.7817	1.47022	0.552777	2.6597	0.00782093	0.0381666
AKR1C3	543.988	2.69387	0.803775	3.35153	0.000803674	0.00617463
ALDH1A2-AS1	28.4007	-1.22263	0.432221	-2.82872	0.00467344	0.0255048
ALDH1A3	147.883	1.48353	0.575391	2.57831	0.00992857	0.0456779
ALDH1B1	402.413	-1.30332	0.186539	-6.98684	2.81151e-12	1.72688e-10
ALDH3B2	185.698	1.13203	0.269163	4.20573	2.60244e-05	0.000346667
ALDOA	3.30826	4.02993	1.13656	3.54572	0.000391536	0.00341949
ALDOC	136.564	-1.01685	0.354751	-2.86637	0.00415208	0.023318
ALKAL2	112.104	1.4096	0.420734	3.35034	0.000807128	0.00619065
ALKBH4	51.7353	1.13639	0.250334	4.53949	5.63905e-06	9.2889e-05
ALOX12B	80.3428	4.15122	1.01353	4.09581	4.20687e-05	0.000527188
ALOX5AP	164.8	-1.7135	0.467468	-3.6655	0.000246857	0.00232631
ALOXE3	3.34212	3.35264	1.28353	2.61205	0.00900011	0.0424072
ALPK3	415.931	-1.53249	0.313457	-4.88901	1.01345e-06	2.04506e-05
ALPL	2780.75	1.51266	0.496736	3.0452	0.00232524	0.0146638
AMIGO2	248.211	-1.40935	0.374386	-3.76444	0.000166922	0.00169561
AMOTL2	877.557	-1.01447	0.319775	-3.17246	0.00151156	0.0103284
ANKFN1	455.361	1.79225	0.411398	4.35647	1.32175e-05	0.000194055
ANKRD20A21P	30.6167	2.7072	0.669048	4.04635	5.20231e-05	0.000631802
ANKRD20A7P	23.4148	1.74743	0.486157	3.59438	0.000325169	0.0029277
ANKRD35	538.176	1.6748	0.532321	3.14623	0.00165392	0.0111517
ANKRD37	13.1991	1.59451	0.578159	2.7579	0.00581733	0.0301978
ANKRD39	96.1596	1.2498	0.302735	4.12837	3.65341e-05	0.000466109
ANLN	1405.14	1.25189	0.239708	5.22254	1.76481e-07	4.21806e-06
ANO4	1654.48	-1.09466	0.341816	-3.20248	0.00136252	0.00947761
ANO7	54.8244	1.37537	0.468214	2.93748	0.00330887	0.0195369
ANO8	364.858	-1.11442	0.276815	-4.02585	5.67696e-05	0.000683155
ANP32BP3	2.42959	3.5273	1.17635	2.9985	0.00271309	0.0165735
ANTKMT	16.2878	1.17867	0.426066	2.7664	0.00566789	0.0296128
AOAH	306.375	-1.51183	0.24062	-6.28305	3.31993e-10	1.41771e-08
AOX1	74.1183	-1.62553	0.32783	-4.95845	7.10574e-07	1.49301e-05
AP1AR	155.445	1.13579	0.165708	6.85413	7.17494e-12	4.21086e-10
AP1S3	9.24304	2.47072	0.707848	3.49047	0.00048217	0.00406688
AP3S2	13.7515	1.43272	0.447452	3.20196	0.00136498	0.00948783
APBB1IP	160.651	-1.11088	0.313552	-3.54289	0.000395772	0.00345111
APOBEC3H	14.2294	-1.42055	0.522315	-2.71972	0.00653363	0.0331225
APOBR	51.0969	-1.87463	0.442078	-4.24049	2.23037e-05	0.000304469
APOF	3.54708	-3.05381	1.01222	-3.01695	0.00255329	0.015791
APOLD1	23.5712	1.21853	0.371052	3.284	0.00102345	0.00748116
APRG1	19.1233	1.03932	0.383074	2.7131	0.0066657	0.0336345
ARHGAP20	1211.93	1.01316	0.375566	2.69769	0.00698229	0.0349099
ARHGAP22	76.0603	-1.14614	0.305963	-3.74599	0.000179682	0.00179674
ARHGAP26	2349.84	1.46223	0.280792	5.20751	1.91388e-07	4.52132e-06
ARHGAP9	216.592	-1.04405	0.188578	-5.53642	3.08716e-08	8.80548e-07
ARHGDIB	768.256	-1.19296	0.289815	-4.1163	3.85009e-05	0.000487656
ARHGEF15	167.396	1.14262	0.441705	2.58684	0.00968595	0.0448232
ARHGEF38	82.7149	1.02293	0.321859	3.17819	0.001482	0.0101636
ARL11	4.47825	-2.52563	0.848575	-2.97632	0.00291733	0.01761
ARL2BP	70.8991	-1.31276	0.208113	-6.3079	2.8285e-10	1.22181e-08
ARL4A	45.3423	3.26605	0.549276	5.9461	2.74605e-09	9.96175e-08
ARL4AP1	11.5126	2.51681	0.61386	4.09997	4.13209e-05	0.000518686
ARL4AP2	5.17963	2.25793	0.846642	2.66692	0.00765493	0.0376021
ARL4AP4	11.7659	1.57654	0.478058	3.2978	0.000974444	0.00721707
ARL4C	82.2161	1.0779	0.32656	3.30076	0.000964216	0.00715787
ARL5AP2	21.6449	1.84084	0.537247	3.42643	0.000611572	0.00492841
ARL6IP1P3	105.039	-1.59513	0.297969	-5.35333	8.63484e-08	2.21493e-06
ARMCX1	140.737	1.99919	0.178475	11.2015	4.00941e-29	2.04289e-26
ARMCX5	113.438	1.63002	0.176081	9.2572	2.09858e-20	3.98713e-18
ARNT2-DT	32.2824	-1.34888	0.32111	-4.20067	2.66128e-05	0.000353663
ARSJ	519.257	-1.01513	0.146954	-6.90784	4.92092e-12	2.94979e-10
ART3	31.4773	3.7292	0.97281	3.83343	0.000126369	0.00134779
ART5	6.38327	-3.2397	0.818146	-3.9598	7.50112e-05	0.000864927
ASIC3	52.9155	-1.51072	0.289519	-5.21802	1.80847e-07	4.31321e-06
ASPN	424.368	-1.09268	0.310935	-3.51417	0.000441133	0.00377472
ASTN1	166.715	-1.11871	0.220553	-5.07232	3.92987e-07	8.76655e-06
ATAD3C	31.0942	-0.999086	0.342289	-2.91884	0.00351341	0.020443
ATMIN	1314.1	-1.09728	0.129963	-8.44305	3.09157e-17	3.76684e-15
ATP13A4	95.2425	1.61234	0.628337	2.56605	0.0102865	0.0469444
ATP2A3	321.176	-1.36341	0.387286	-3.52042	0.000430861	0.00370095
ATP5MC1P4	2.49561	3.62876	1.17654	3.08426	0.00204057	0.0132409
ATP5ME	1557.34	1.01634	0.120657	8.42331	3.65982e-17	4.41127e-15
ATP5MK	198.554	2.45753	0.22379	10.9814	4.69444e-28	2.10489e-25
ATP6V1C2	631.024	2.0959	0.447573	4.68281	2.82966e-06	5.09135e-05
ATP6V1E2	7.31545	4.01239	0.953341	4.20876	2.56775e-05	0.000342249
ATP7B	1831.51	1.03509	0.351226	2.94708	0.00320795	0.0190464
B3GALT5	66.8784	1.42402	0.367015	3.88	0.000104458	0.00114292
B3GALT6	17.2164	1.48349	0.376946	3.93554	8.30102e-05	0.000942282
B3GNT4	19.7012	-1.34099	0.393729	-3.40587	0.000659534	0.00523255
B3GNT9	37.6372	2.61208	0.358952	7.27697	3.41402e-13	2.43755e-11
B3GNTL1	33.3315	-1.20008	0.422423	-2.84094	0.00449802	0.0247281
B4GALT1	4528.12	-1.14391	0.397192	-2.87998	0.00397696	0.022498
B4GALT2	429.37	1.06287	0.181004	5.87207	4.30391e-09	1.50295e-07
B4GAT1	56.2797	1.08159	0.267099	4.04939	5.13522e-05	0.00062655
BABAM1	134.444	-1.37238	0.200905	-6.83099	8.43334e-12	4.83547e-10
BACH2	63.4281	-1.03878	0.333671	-3.11319	0.00185076	0.0122693
BAG5	871.905	1.08338	0.305271	3.54892	0.000386821	0.00338491
BAIAP2L2	62.9016	1.82523	0.4555	4.00709	6.14724e-05	0.000730726
BASP1P1	288.241	1.44114	0.547674	2.63139	0.00850371	0.0407355
BATF2	16.5639	-1.45995	0.403056	-3.62219	0.000292117	0.0026862
BCAT1	1336.39	-1.53765	0.451512	-3.40555	0.000660301	0.00523318
BCL2A1	28.0826	-2.92553	0.629033	-4.65084	3.3059e-06	5.79476e-05
BEST4	15.9277	1.86965	0.632671	2.95517	0.00312502	0.018628
BEX1	92.1134	-1.66479	0.47846	-3.47947	0.000502413	0.00420755
BEX2	110.002	-1.41461	0.404924	-3.49352	0.000476698	0.00402678
BIK	13.6563	-2.00894	0.691768	-2.90406	0.00368354	0.0211639
BIRC5	133.363	1.41624	0.291086	4.86538	1.14237e-06	2.26044e-05
BLCAP	61.3871	1.54419	0.252236	6.12202	9.23985e-10	3.70588e-08
BLID	10.4571	-1.89386	0.585246	-3.23601	0.00121213	0.00859416
BMF	129.993	1.38105	0.450344	3.06666	0.00216464	0.0138853
BMP2	119.382	-1.06815	0.352379	-3.03126	0.00243535	0.0151745
BMP2KL	20.9893	2.28035	0.405368	5.62537	1.85112e-08	5.59302e-07
BMP4	185.395	1.00165	0.280395	3.5723	0.000353863	0.00313691
BMP6	46.3559	-1.05799	0.371121	-2.85078	0.00436117	0.0241178
BMX	43.3781	-1.26271	0.345504	-3.6547	0.000257482	0.00240822
BOC	490.664	1.08742	0.324173	3.35445	0.00079524	0.00611821
BORCS8	43.3582	-1.35962	0.338416	-4.0176	5.87932e-05	0.000704858
BRD7P2	94.9866	-1.01797	0.256401	-3.97022	7.18056e-05	0.000831513
BRD7P3	58.4855	1.39393	0.292356	4.76791	1.86143e-06	3.49802e-05
BRDTP1	5.55481	5.4289	1.24918	4.34598	1.38656e-05	0.000202247
BST2	312.147	-2.05102	0.479696	-4.27566	1.9057e-05	0.000266192
BTBD10P2	6.28033	2.16218	0.672632	3.21451	0.00130668	0.00915165
BTF3P10	29.658	-1.29951	0.497931	-2.60983	0.00905885	0.0426034
BTG3	589.887	1.69442	0.425296	3.98409	6.77399e-05	0.000791794
BUD31	101.72	1.72462	0.268151	6.43152	1.26334e-10	5.86395e-09
BVES	163.499	2.80348	0.556556	5.0372	4.72395e-07	1.03424e-05
BYSL	228.116	1.15704	0.176787	6.54478	5.95817e-11	2.97497e-09
C10orf71	7.93789	3.43336	1.08415	3.16688	0.00154086	0.0104998
C11orf68	185.366	1.10763	0.202769	5.46251	4.69436e-08	1.28502e-06
C11orf97	13.9561	2.21964	0.868081	2.55695	0.0105593	0.0478821
C16orf54	16.436	-1.58075	0.531611	-2.97351	0.00294412	0.0177574
C19orf18	51.7617	1.18901	0.324752	3.66129	0.000250946	0.00235988
C1orf220	18.0906	1.89291	0.495737	3.81837	0.000134338	0.00141329
C1QBPP2	12.8354	1.72322	0.460275	3.74389	0.000181195	0.00180543
C1QL1	20.5787	1.56147	0.53477	2.91989	0.0035015	0.0203896
C1QTNF2	21.7657	1.41598	0.414998	3.41202	0.000644836	0.00514103
C1QTNF3-AMACR	21.9998	2.70054	0.422748	6.38807	1.67997e-10	7.62413e-09
C1QTNF6	102.753	1.29668	0.420815	3.08136	0.00206056	0.0133513
C2orf74-DT	2.06508	3.27934	1.26613	2.59005	0.00959623	0.0444959
C3AR1	66.3808	-1.16288	0.357804	-3.25004	0.00115388	0.00825425
C3orf38	237.881	1.11329	0.158089	7.04216	1.89276e-12	1.19196e-10
C3orf70	38.538	-1.08987	0.384385	-2.83535	0.00457759	0.0250917
C4BPA	38.6396	-1.30095	0.484911	-2.68287	0.00729932	0.0362043
C5orf49	45.8607	1.4455	0.551724	2.61997	0.00879376	0.041689
C6orf226	8.82187	-1.75518	0.669274	-2.62251	0.0087285	0.0414761
C7	153.503	1.9861	0.596304	3.33068	0.000866327	0.00657043
C7orf25	159.341	2.3261	0.195444	11.9016	1.1604e-32	8.9707e-30
C8orf34	76.765	1.18361	0.457389	2.58775	0.00966054	0.0447479
C8orf76	19.0817	1.39169	0.376942	3.69206	0.000222444	0.00212846
C9orf152	252.725	2.05541	0.426951	4.81415	1.47831e-06	2.84482e-05
CA11	628.656	-1.27814	0.286807	-4.45643	8.3336e-06	0.000130196
CA4	55.7713	1.48309	0.488021	3.039	0.00237368	0.0149003
CACNA1C	1036.73	-1.061	0.34015	-3.11921	0.0018134	0.0120565
CACNA2D2	144.486	-1.21959	0.411758	-2.96192	0.00305729	0.0182826
CALB2	455.4	5.3171	1.22863	4.32765	1.50708e-05	0.000217281
CALHM5	15.3791	-1.54435	0.419039	-3.68546	0.000228286	0.00217785
CAMK1G	36.4517	-1.40698	0.45703	-3.07854	0.0020802	0.0134553
CAMK2N1	61.0511	1.15652	0.365581	3.1635	0.00155883	0.0106062
CAMK2N2	6.82839	3.07357	0.826982	3.71661	0.000201911	0.00197843
CAMKK1	211.966	-1.02694	0.198056	-5.18508	2.15923e-07	5.04248e-06
CAMSAP3	244.031	1.13197	0.17691	6.39856	1.56853e-10	7.1619e-09
CAPN12	45.4848	1.5696	0.505101	3.10749	0.00188684	0.0124378
CAPN13	38.2398	-1.8617	0.706345	-2.63568	0.0083969	0.0403451
CAPN8	6.9621	3.1132	0.921229	3.3794	0.000726448	0.00567465
CARD11	196.78	-1.0417	0.353406	-2.94761	0.00320243	0.0190237
CARMIL2	61.1382	-1.43428	0.413898	-3.4653	0.000529636	0.00440264
CASC19	8.12423	3.38115	0.903779	3.74113	0.000183196	0.0018189
CASQ2	18.0235	3.55779	0.983566	3.61723	0.00029777	0.00272589
CBLN4	224.539	-1.45335	0.423134	-3.43473	0.000593139	0.00480231
CCDC127	304.323	-1.18231	0.152949	-7.73009	1.07471e-14	9.37509e-13
CCDC146	1073.83	1.32718	0.287859	4.61052	4.01667e-06	6.87494e-05
CCDC152	25.4273	1.32755	0.413032	3.21416	0.00130826	0.00915984
CCDC160	6.44502	3.45878	0.977785	3.53736	0.000404148	0.00350778
CCDC198	90.6429	-2.01199	0.75415	-2.6679	0.00763281	0.0375016
CCDC54	16.2654	4.17687	1.21958	3.42486	0.000615128	0.00494892
CCDC85B	27.8829	1.15369	0.372846	3.09427	0.00197299	0.0128845
CCL22	24.8779	-4.55198	0.813057	-5.5986	2.16091e-08	6.41662e-07
CCN3	199.481	1.77135	0.531271	3.33417	0.000855535	0.00650619
CCN4	111.452	-1.65892	0.505819	-3.27966	0.00103931	0.00757978
CCNB2	349.309	1.12888	0.191752	5.88717	3.92857e-09	1.38265e-07
CCR1	60.2015	-2.08945	0.262664	-7.95483	1.79376e-15	1.74845e-13
CD151	1788.21	1.08859	0.16629	6.54637	5.89528e-11	2.95014e-09
CD19	31.7049	-1.94666	0.540534	-3.60135	0.000316564	0.00286634
CD1D	15.6107	-1.51823	0.552918	-2.74586	0.00603534	0.0310763
CD226	34.6529	-1.01412	0.376394	-2.69431	0.00705347	0.0351951
CD244	34.7621	-1.34925	0.408717	-3.30119	0.000962742	0.00714929
CD247	197.63	-1.54034	0.343089	-4.48963	7.13481e-06	0.000113685
CD300A	67.9031	-1.63992	0.291824	-5.61957	1.91438e-08	5.76087e-07
CD36	1039.14	2.63039	0.7559	3.47981	0.000501763	0.00420524
CD38	99.2312	-1.34693	0.221748	-6.07414	1.24657e-09	4.90282e-08
CD3D	166.736	-1.53911	0.410807	-3.74656	0.000179275	0.00179427
CD3E	297.568	-1.65264	0.288219	-5.734	9.8091e-09	3.16418e-07
CD3G	68.1817	-1.3271	0.511827	-2.59287	0.00951797	0.0442796
CD48	43.3615	-2.04166	0.370951	-5.50385	3.71582e-08	1.04001e-06
CD52	33.1681	-1.13126	0.348398	-3.24704	0.00116612	0.00832061
CD53	558.702	-1.09071	0.24976	-4.36704	1.25939e-05	0.000185996
CD6	57.877	-1.81718	0.443294	-4.09927	4.14449e-05	0.000519951
CD7	39.0098	-1.22591	0.448218	-2.73508	0.00623652	0.0318925
CD70	3.70805	-4.24268	1.60796	-2.63855	0.00832612	0.0400992
CD74	5606.14	-1.18052	0.242005	-4.87808	1.07121e-06	2.14615e-05
CD79A	20.6657	-3.54327	0.898037	-3.94557	7.9609e-05	0.000908272
CD80	20.3623	-1.73868	0.56615	-3.07105	0.00213305	0.0137259
CD83	117.776	-1.22325	0.204583	-5.97926	2.24158e-09	8.27581e-08
CD84	79.7966	-1.63744	0.330125	-4.96007	7.04689e-07	1.48342e-05
CD8B	10.6941	-1.69885	0.579838	-2.92987	0.00339103	0.0199015
CD9	1445.86	1.30132	0.233097	5.58276	2.36734e-08	6.92865e-07
CD96	372.957	-1.09786	0.265111	-4.14111	3.45626e-05	0.000445577
CDCA4	51.8235	1.90586	0.272609	6.99117	2.72607e-12	1.68363e-10
CDH26	39.3592	-1.3497	0.250613	-5.38559	7.22058e-08	1.8845e-06
CDH3	347.651	-1.9096	0.586261	-3.25725	0.00112498	0.00807588
CDH6	245.692	-1.66244	0.568875	-2.92233	0.00347427	0.0202627
CDHR1	437.582	-1.52477	0.495201	-3.07909	0.00207631	0.0134379
CDK2AP2	290.213	-1.17035	0.212085	-5.5183	3.42304e-08	9.66512e-07
CDKL1	265.592	1.09977	0.326343	3.36999	0.000751716	0.00582801
CDKL4	20.4066	1.08808	0.400918	2.71398	0.00664808	0.0335759
CDKN2C	218.683	1.36424	0.257541	5.29715	1.17625e-07	2.93657e-06
CDKN2D	25.7656	1.59461	0.394439	4.04274	5.28305e-05	0.000639528
CDPF1P1	4.49723	2.70995	0.953783	2.84127	0.00449345	0.024709
CEACAM1	1460.95	1.70792	0.352392	4.84663	1.25576e-06	2.45021e-05
CEACAM5	19.5166	-4.27392	1.27879	-3.34217	0.000831267	0.00634964
CEACAMP1	7.87549	2.00635	0.593068	3.383	0.000716991	0.00560663
CEACAMP5	7.49205	2.43827	0.697205	3.49721	0.000470152	0.00397599
CENPE	1932.05	1.09422	0.270965	4.03823	5.38562e-05	0.000651241
CENPT	1504.82	-1.0097	0.163247	-6.1851	6.20627e-10	2.553e-08
CENPW	127.478	2.5879	0.378912	6.82981	8.50263e-12	4.86277e-10
CEP19	41.0596	1.42558	0.28299	5.03755	4.71526e-07	1.03335e-05
CEP295NL	208.129	-1.62279	0.241828	-6.7105	1.93958e-11	1.05287e-09
CEP57L1	386.411	1.00569	0.154614	6.5045	7.79537e-11	3.8075e-09
CER1	18.3699	-1.81212	0.512011	-3.53922	0.000401313	0.00349014
CFAP141	15.5797	2.10919	0.613333	3.43889	0.000584101	0.0047448
CFL1P3	21.3768	-1.45693	0.443533	-3.28483	0.00102046	0.00747551
CFL1P4	14.5656	-1.27664	0.476308	-2.68028	0.00735599	0.0364129
CGGBP1	244.32	-1.84554	0.164533	-11.2168	3.37139e-29	1.75775e-26
CHAC2	100.728	1.75823	0.266929	6.58689	4.49135e-11	2.30416e-09
CHAD	32.9718	-1.04474	0.351742	-2.97019	0.00297614	0.0178831
CHD1L	67.1546	1.27549	0.221767	5.75147	8.84691e-09	2.89124e-07
CHI3L1	21.9475	-2.02659	0.662927	-3.05703	0.00223543	0.0142335
CHL1	183.384	-2.31287	0.874553	-2.64463	0.00817804	0.0395622
CHMP3	16.7561	1.26931	0.467138	2.71722	0.00658338	0.0333226
CHMP5P1	8.2851	-1.67295	0.592707	-2.82257	0.0047641	0.0258987
CHRDL1	133.858	-2.01902	0.589543	-3.42472	0.000615442	0.00494892
CHRNA3	32.2818	1.72338	0.489964	3.51736	0.000435862	0.00373674
CHRNA5	5.2482	-2.21404	0.707315	-3.1302	0.00174686	0.01168
CHRNB4	9.87394	2.24202	0.656029	3.41756	0.000631842	0.00506127
CHST15	440.612	-1.04965	0.258123	-4.06649	4.77273e-05	0.000588132
CIART	124.065	-1.02627	0.257895	-3.9794	6.90907e-05	0.000804229
CIB2	126.157	1.14691	0.220468	5.20217	1.96977e-07	4.63868e-06
CILP	513.312	1.84071	0.509893	3.60999	0.000306209	0.00279175
CIR1P2	10.828	1.39814	0.546518	2.55826	0.0105196	0.0477505
CISH	82.1088	-1.10476	0.317176	-3.48311	0.000495624	0.00416357
CITED2	447.624	1.33443	0.334777	3.98602	6.71914e-05	0.000787403
CITED4	12.5514	2.03249	0.499377	4.07005	4.70025e-05	0.000581861
CKAP2L	328.709	1.76394	0.222044	7.9441	1.95599e-15	1.86884e-13
CKB	2890.92	1.98528	0.494249	4.01676	5.90046e-05	0.000705506
CLC	10.4756	-2.17433	0.85169	-2.55296	0.0106811	0.0483069
CLCF1	104.934	-1.2206	0.301282	-4.05136	5.09201e-05	0.000621775
CLDN10	767.65	-1.15761	0.268869	-4.30548	1.66625e-05	0.000236877
CLDN12	269.399	-1.2439	0.174948	-7.11012	1.15943e-12	7.57819e-11
CLDN20	31.5693	1.22131	0.297024	4.11182	3.92546e-05	0.000495523
CLEC14A	146.224	-1.65741	0.232963	-7.11449	1.12329e-12	7.38508e-11
CLEC7A	51.1866	-1.33985	0.290291	-4.61553	3.92091e-06	6.75655e-05
CLNK	48.3489	-2.6087	0.389945	-6.68992	2.23294e-11	1.20049e-09
CMPK2	39.2384	-1.07653	0.295754	-3.63995	0.000272696	0.00252731
CMTR2	212.896	2.45976	0.267234	9.2045	3.43257e-20	6.25648e-18
CNKSR3	88.8232	2.21593	0.210768	10.5136	7.47879e-26	2.50249e-23
CNN2	1136.38	-1.14355	0.290349	-3.93855	8.19765e-05	0.000932909
CNTN4	861.004	-1.52513	0.25544	-5.97062	2.36361e-09	8.67953e-08
CNTNAP3B	79.92	1.09442	0.336514	3.25222	0.00114508	0.00819915
COL15A1	6331.33	-1.23057	0.391886	-3.14012	0.00168881	0.011363
COL22A1	148.926	-1.83414	0.496843	-3.69159	0.000222855	0.00213057
COL9A2	907.881	-1.04377	0.249416	-4.18486	2.85345e-05	0.000375419
COLCA1	25.0663	2.49977	0.518117	4.82473	1.40193e-06	2.70947e-05
COLEC12	324.055	-1.46531	0.412464	-3.55257	0.000381494	0.00334352
COMMD7	59.5607	1.93124	0.249597	7.73742	1.01454e-14	8.91961e-13
COMP	9.28598	-1.56423	0.614369	-2.54608	0.010894	0.0490229
COPE	347.233	1.14019	0.14557	7.83259	4.7791e-15	4.3911e-13
COQ4	360.083	-1.11646	0.135802	-8.22123	2.01425e-16	2.24664e-14
CORIN	97.7781	3.11624	0.495813	6.28512	3.27597e-10	1.4016e-08
COTL1	340.918	-1.14603	0.273471	-4.19068	2.78119e-05	0.000368289
COX19	36.364	1.95393	0.329869	5.92336	3.15429e-09	1.12965e-07
COX6A1P2	132.38	1.51298	0.214834	7.04258	1.88714e-12	1.19177e-10
CP	2171.61	-1.53385	0.481515	-3.18546	0.00144522	0.00995099
CPA3	47.7984	-2.93726	0.84682	-3.46858	0.000523224	0.00436066
CPA6	18.7209	-2.47984	0.865439	-2.86542	0.0041646	0.0233638
CPEB2	234.626	1.29372	0.347627	3.72158	0.000197983	0.00194504
CPED1	2264.47	-1.19156	0.244485	-4.87376	1.09496e-06	2.18054e-05
CPNE7	49.9865	-1.42463	0.309295	-4.60604	4.10401e-06	6.99509e-05
CPS1	418.643	1.36304	0.245972	5.54145	2.99976e-08	8.59995e-07
CPVL	416.269	-1.07574	0.295476	-3.64069	0.000271908	0.00252314
CRACR2B	102.702	1.29114	0.339818	3.79952	0.000144977	0.00150543
CRCP	52.036	1.09566	0.215008	5.09589	3.47102e-07	7.85203e-06
CREB3L4	492.395	1.49449	0.210982	7.08349	1.40567e-12	9.08178e-11
CRTAM	16.26	-2.00291	0.422311	-4.74273	2.10858e-06	3.92626e-05
CSF1	107.458	-1.10464	0.382632	-2.88695	0.00389002	0.0220943
CSF1R	706.497	-1.24308	0.268234	-4.63432	3.58106e-06	6.23321e-05
CSF2RB	182.426	-1.1086	0.391465	-2.83193	0.00462681	0.0253182
CSF3R	213.304	-1.57235	0.57153	-2.75112	0.00593914	0.0306373
CSMD3	144.38	-2.15319	0.67037	-3.21194	0.00131843	0.00921955
CSP2	14.1859	4.00912	1.18679	3.37811	0.000729854	0.00569926
CSRNP1	209.339	1.02602	0.342937	2.99187	0.00277272	0.0168964
CTAGE3P	145.166	1.85204	0.339395	5.45687	4.84597e-08	1.31847e-06
CTAGE9	238.918	2.24807	0.517625	4.34305	1.40518e-05	0.000204697
CTH	374.139	1.19723	0.439312	2.72524	0.0064254	0.0326646
CTLA4	7.8786	-4.03441	0.962364	-4.19218	2.76282e-05	0.00036629
CTNNBIP1	166.004	1.42835	0.202176	7.06491	1.60726e-12	1.02913e-10
CTNND2	86.8803	1.74371	0.654175	2.66552	0.00768704	0.0376985
CTSW	246.993	-1.78929	0.314337	-5.69229	1.25349e-08	3.96362e-07
CTTNBP2NL	1402.8	-1.10199	0.153223	-7.19203	6.38361e-13	4.40351e-11
CTXN1	29.4046	2.38762	0.378082	6.31509	2.70003e-10	1.1731e-08
CUX2	117.364	-1.65081	0.62249	-2.65195	0.00800277	0.0388679
CX3CR1	38.7624	-2.01857	0.57848	-3.48945	0.000484024	0.00407807
CXCL10	59.534	-2.27709	0.460068	-4.94946	7.44214e-07	1.55494e-05
CXCL12	1502.8	-1.36297	0.469262	-2.9045	0.00367839	0.0211451
CXXC5	132.022	1.55883	0.236771	6.58369	4.58905e-11	2.34355e-09
CYB561D1	59.1848	0.995396	0.222493	4.47384	7.68273e-06	0.000121381
CYB5A	1600.73	1.31832	0.325933	4.04476	5.23767e-05	0.000635752
CYCSP24	9.74987	1.95806	0.571538	3.42595	0.000612649	0.00493354
CYCSP34	90.373	1.78698	0.277883	6.43071	1.27008e-10	5.88306e-09
CYCSP40	3.45538	4.16429	1.21753	3.42028	0.000625568	0.00501775
CYCSP52	6.91788	2.36002	0.764308	3.08778	0.00201659	0.0131233
CYFIP2	967.575	-1.02625	0.11172	-9.18587	4.08196e-20	7.38011e-18
CYP24A1	102.974	-2.32667	0.694578	-3.34976	0.00080881	0.00619922
CYP2J2	270.401	1.13113	0.370054	3.05665	0.00223828	0.0142476
CYP2S1	66.2418	-1.08412	0.373599	-2.90182	0.00371005	0.0212834
CYP4A11	6.44741	2.79976	0.979387	2.85868	0.00425404	0.0236947
CYP4B1	29.7852	1.92865	0.572967	3.36607	0.000762466	0.00589235
CYP51A1	23.9131	1.0441	0.397466	2.6269	0.00861675	0.0410757
CYRIA	174.714	-1.00778	0.253213	-3.97997	6.89235e-05	0.0008027
CYTH4	231.303	-1.28733	0.199218	-6.46191	1.0339e-10	4.87977e-09
CYTIP	79.6819	-1.37251	0.316937	-4.33055	1.4874e-05	0.000214858
DAP3P2	27.8828	1.39331	0.322774	4.31668	1.58391e-05	0.000226465
DBP	687.557	-1.93973	0.237623	-8.16304	3.26686e-16	3.55533e-14
DCAF12L2	9.32794	1.6267	0.561729	2.89588	0.00378102	0.0215966
DCAF4L1	5.77992	1.89342	0.729301	2.59621	0.00942593	0.0439243
DCST2	62.9745	1.40841	0.356237	3.95357	7.69932e-05	0.000883373
DCT	12.9469	3.56022	1.06633	3.33876	0.000841541	0.00642155
DDA1	185.551	1.10381	0.160489	6.87778	6.0794e-12	3.60566e-10
DDIT4	192.065	1.33584	0.313609	4.25956	2.04834e-05	0.000282421
DDO	26.4372	-1.47172	0.454954	-3.23488	0.00121695	0.00862014
DDX18P3	34.5326	1.27301	0.335888	3.78999	0.000150652	0.00155501
DDX28	90.4215	2.08213	0.264927	7.85923	3.8649e-15	3.59532e-13
DDX3P1	102.47	1.13801	0.22445	5.07022	3.9736e-07	8.84649e-06
DENND2C	309.331	1.09904	0.40642	2.70419	0.00684715	0.034403
DKK1	42.0795	2.45907	0.665643	3.69427	0.000220517	0.00211281
DLX6-AS1	15.2064	1.13449	0.400669	2.83148	0.00463327	0.0253403
DMBT1	1659.6	1.87004	0.517078	3.61656	0.000298546	0.00272965
DMRTA1	59.1688	2.30599	0.609399	3.78404	0.000154305	0.00158686
DNAH17	51.8537	-1.21662	0.305433	-3.98325	6.79779e-05	0.000793749
DNAJB5	280.439	-1.19671	0.315234	-3.79626	0.000146896	0.00152254
DNAJB6P2	11.7485	1.58484	0.604502	2.62172	0.00874873	0.0415458
DNAJC12	138.607	1.62053	0.224165	7.2292	4.85865e-13	3.39333e-11
DNASE1L3	37.1932	-2.29987	0.443148	-5.18985	2.10459e-07	4.92513e-06
DOCK2	695.651	-1.13263	0.229678	-4.9314	8.16433e-07	1.69165e-05
DOCK4	1348.23	-1.08478	0.22347	-4.85423	1.20856e-06	2.37464e-05
DOCK8	1462.8	-1.06022	0.26767	-3.96092	7.46606e-05	0.000861904
DPEP3	3.44371	-3.8308	1.12672	-3.39995	0.00067397	0.00532408
DPF1	42.567	1.43727	0.321556	4.46974	7.83134e-06	0.000123468
DPP4	335.088	-1.37555	0.212449	-6.4747	9.50009e-11	4.55091e-09
DPP9-AS1	20.6171	1.61582	0.446271	3.62072	0.000293785	0.00269712
DPT	58.2315	-1.32754	0.267328	-4.96597	6.83603e-07	1.4431e-05
DRAP1	586.405	1.54006	0.119175	12.9227	3.35267e-38	3.95597e-35
DSG4	3.37199	4.11122	1.59002	2.58564	0.00971992	0.0449486
DSTNP1	8.3039	2.08149	0.605306	3.43874	0.00058442	0.00474542
DSTNP2	31.3079	1.10799	0.289997	3.8207	0.000133071	0.00140464
DTYMK	250.853	1.06985	0.187107	5.71785	1.07882e-08	3.4453e-07
DUSP1	693.363	-2.86929	0.373585	-7.68042	1.5857e-14	1.33145e-12
DUSP2	88.9327	-2.58925	0.604695	-4.28191	1.85293e-05	0.000259469
DUSP23	91.9029	1.03364	0.23609	4.37814	1.19697e-05	0.000177832
DUSP6	241.38	1.00446	0.220092	4.56382	5.02311e-06	8.3852e-05
DYNLL1	3913.3	1.47733	0.153883	9.60034	7.96836e-22	1.71772e-19
E2F3P1	22.1177	-1.91015	0.426442	-4.47927	7.49e-06	0.000118586
EAF2	108.488	1.58349	0.402454	3.93458	8.33413e-05	0.000944605
ECI2	886.902	1.14954	0.306335	3.75257	0.000175033	0.00175967
EDARADD	76.8411	1.09723	0.229841	4.77386	1.80731e-06	3.40488e-05
EDN3	1051.84	1.07676	0.350117	3.07542	0.00210205	0.013577
EEF1A1P3	45.3745	1.20262	0.277009	4.34147	1.41535e-05	0.000206044
EEF1A1P6	95.5203	1.65205	0.559648	2.95195	0.00315769	0.0187878
EEF1B2P1	38.6312	-0.996696	0.274952	-3.62498	0.00028898	0.00265954
EEF1GP7	6.0456	-1.67648	0.650949	-2.57543	0.0100114	0.0459743
EEFSEC	266.545	-1.05123	0.165913	-6.33602	2.35769e-10	1.03641e-08
EFCAB10	16.0586	1.73639	0.526268	3.29944	0.00096877	0.00718796
EFHC2	310.691	1.11223	0.437038	2.54492	0.0109302	0.0491662
EFHD1	143.455	-1.02076	0.31451	-3.24555	0.00117226	0.0083564
EGR1	2159.66	-2.23317	0.543598	-4.10812	3.98895e-05	0.000502688
EGR2	82.1413	-2.33765	0.528583	-4.42248	9.75752e-06	0.00014932
EGR3	42.9225	-2.21328	0.535946	-4.12967	3.63284e-05	0.000464072
EIF1P3	22.1009	1.72326	0.458246	3.76057	0.00016953	0.00171511
EIF3LP1	74.8377	1.26928	0.338133	3.75379	0.00017418	0.00175267
EIF4BP3	16.3864	1.32114	0.403305	3.27579	0.00105365	0.00765451
EIF4BP5	27.4029	1.06512	0.339501	3.13732	0.00170502	0.011448
EIF4EP1	85.0155	1.23458	0.284603	4.33789	1.43856e-05	0.000208744
EIF4HP1	21.9403	1.20099	0.353348	3.39889	0.000676601	0.00534277
ELK4	1889.97	-1.28121	0.111287	-11.5127	1.13883e-30	6.90036e-28
EMB	63.1755	-1.27846	0.273686	-4.67126	2.99353e-06	5.34757e-05
EMC7	270.286	1.27762	0.137867	9.26702	1.91417e-20	3.66784e-18
ENDOG	11.4855	2.53717	0.685493	3.70124	0.000214551	0.00206794
ENKD1	67.0283	-1.2819	0.212186	-6.04139	1.52796e-09	5.88579e-08
ENPP2	3098.88	-1.16303	0.211842	-5.49008	4.01745e-08	1.11746e-06
ENPP3	1357.14	1.83377	0.407186	4.50351	6.68409e-06	0.000107574
ENSG00000165121	22.1287	-1.55017	0.340789	-4.54878	5.39575e-06	8.96054e-05
ENSG00000173862	18.0445	-1.82327	0.527592	-3.45584	0.000548587	0.00451497
ENSG00000197550	25.2126	4.81417	0.885384	5.43738	5.40702e-08	1.45522e-06
ENSG00000205018	89.8037	-1.18159	0.315786	-3.74174	0.000182752	0.00181609
ENSG00000205584	8.9488	2.03502	0.70255	2.89662	0.00377203	0.0215618
ENSG00000206567	13.1429	2.14883	0.527989	4.06984	4.70453e-05	0.000582069
ENSG00000213184	25.9711	2.56252	0.450714	5.68547	1.30457e-08	4.10199e-07
ENSG00000213287	10.8781	1.69706	0.623053	2.72378	0.00645399	0.032794
ENSG00000213514	31.5896	1.52967	0.378292	4.04362	5.26333e-05	0.000638175
ENSG00000214147	13.7635	4.30195	1.13543	3.78884	0.000151351	0.00155935
ENSG00000214708	32.3048	-1.74645	0.332449	-5.2533	1.49399e-07	3.62781e-06
ENSG00000214773	17.825	2.28019	0.478951	4.7608	1.9283e-06	3.6146e-05
ENSG00000214999	5.27494	3.60149	1.33819	2.69131	0.00711722	0.0354738
ENSG00000215198	89.699	1.27297	0.34567	3.68262	0.000230846	0.00219398
ENSG00000217181	6.81722	2.57663	0.779727	3.30453	0.000951343	0.00708106
ENSG00000218596	38.5151	1.94621	0.281314	6.91826	4.5721e-12	2.75543e-10
ENSG00000218857	12.7804	1.37804	0.470729	2.92746	0.00341744	0.0200169
ENSG00000219023	12.8293	1.20009	0.464358	2.5844	0.00975488	0.0450731
ENSG00000219951	4.47483	2.34619	0.879043	2.66902	0.00760722	0.0374138
ENSG00000220472	99.4506	2.15891	0.232051	9.3036	1.3577e-20	2.6468e-18
ENSG00000223528	6.19384	-1.72421	0.628755	-2.74225	0.00610191	0.0313399
ENSG00000224025	4.50487	-2.48777	0.891285	-2.79122	0.00525099	0.0278434
ENSG00000224593	53.4774	2.08061	0.307277	6.77113	1.27781e-11	7.05597e-10
ENSG00000225840	32.8055	1.33492	0.316354	4.21971	2.4462e-05	0.000328588
ENSG00000226084	302.45	1.09023	0.19594	5.56408	2.63535e-08	7.61364e-07
ENSG00000226180	25.9455	-2.1294	0.400503	-5.31682	1.05596e-07	2.64806e-06
ENSG00000226984	2.20171	3.35203	1.23298	2.71865	0.00655493	0.0332176
ENSG00000227077	2.07621	3.97639	1.34103	2.96516	0.00302521	0.018144
ENSG00000227158	11.5852	1.95942	0.618579	3.16761	0.00153698	0.0104798
ENSG00000227486	6.08053	2.33419	0.767928	3.03959	0.002369	0.0148769
ENSG00000228205	43.0171	1.11114	0.299935	3.70462	0.00021171	0.00204848
ENSG00000228259	2.40346	-4.23343	1.38925	-3.04727	0.0023093	0.0145919
ENSG00000228477	63.1616	1.33427	0.312542	4.26909	1.96273e-05	0.000272799
ENSG00000230221	45.8027	-1.50235	0.247758	-6.0638	1.32946e-09	5.16553e-08
ENSG00000230459	15.3069	1.65294	0.466667	3.54202	0.000397072	0.00345842
ENSG00000230532	9.96976	-1.90709	0.475531	-4.01044	6.06068e-05	0.000721968
ENSG00000230551	19.9467	1.73898	0.377824	4.60262	4.17209e-06	7.09667e-05
ENSG00000230563	7.59917	-6.23207	1.39587	-4.46466	8.0195e-06	0.000125815
ENSG00000230637	7.50159	2.75938	0.818477	3.37136	0.000747978	0.00580843
ENSG00000230882	8.86494	3.61157	0.888733	4.06373	4.82941e-05	0.000593914
ENSG00000231965	2.34878	4.14293	1.32257	3.13248	0.00173336	0.0116035
ENSG00000232053	4.31781	4.4467	1.49716	2.9701	0.00297701	0.0178836
ENSG00000232611	5.32161	2.07481	0.723418	2.86807	0.00412982	0.0232105
ENSG00000233037	13.0251	1.41725	0.505566	2.80329	0.00505839	0.0270718
ENSG00000233264	25.8893	1.03705	0.340853	3.04251	0.00234615	0.0147582
ENSG00000233668	6.27953	2.94791	0.81484	3.61777	0.000297149	0.00272243
ENSG00000233757	54.5307	2.37467	0.307844	7.71387	1.22057e-14	1.04045e-12
ENSG00000233820	43.8918	1.30224	0.309696	4.20489	2.6121e-05	0.000347541
ENSG00000233836	782.498	2.06832	0.250571	8.25443	1.52632e-16	1.73698e-14
ENSG00000233891	28.0469	2.45411	0.429087	5.71938	1.06914e-08	3.41928e-07
ENSG00000234017	13.1353	1.39576	0.436554	3.19722	0.0013876	0.00962521
ENSG00000234271	2.01972	3.2508	1.24187	2.61767	0.00885334	0.0418829
ENSG00000234607	9.13503	1.50017	0.567853	2.64182	0.00824608	0.0398253
ENSG00000234983	29.737	1.30416	0.315637	4.13183	3.59889e-05	0.000460688
ENSG00000235224	5.06324	2.88122	0.942825	3.05594	0.00224355	0.0142646
ENSG00000235286	11.1225	1.9043	0.499939	3.80906	0.000139494	0.00145864
ENSG00000235945	2.93288	3.19374	1.12855	2.82995	0.00465553	0.0254133
ENSG00000236114	5.78529	4.25624	1.35928	3.13125	0.00174065	0.0116453
ENSG00000236478	52.1892	1.4573	0.351495	4.14601	3.38326e-05	0.000437681
ENSG00000236529	35.3925	1.51464	0.52867	2.86501	0.00416998	0.0233717
ENSG00000236773	40.9341	-1.78671	0.306888	-5.82202	5.8142e-09	1.96308e-07
ENSG00000236829	66.7634	1.11663	0.345844	3.22871	0.00124349	0.0087915
ENSG00000236942	17.5371	1.28457	0.488374	2.6303	0.00853099	0.0408318
ENSG00000237115	26.29	-1.12921	0.427977	-2.63848	0.00832785	0.0400992
ENSG00000237268	6.39397	3.29152	0.899472	3.65939	0.000252818	0.00237251
ENSG00000239455	19.76	2.50018	0.841229	2.97206	0.00295807	0.0178032
ENSG00000240265	12.1907	1.37832	0.503488	2.73754	0.00619007	0.0317095
ENSG00000240729	54.9329	1.16007	0.305868	3.79272	0.000149003	0.00154082
ENSG00000240950	29.5608	2.39142	0.641297	3.72904	0.000192208	0.00189412
ENSG00000241207	28.285	1.41892	0.488261	2.90606	0.00366012	0.0210671
ENSG00000241546	3.40437	2.72907	1.06066	2.573	0.0100822	0.046251
ENSG00000241612	118.114	1.89988	0.51923	3.65904	0.000253161	0.00237452
ENSG00000242477	7.16399	2.8938	0.793684	3.64603	0.000266319	0.00247846
ENSG00000242737	6.33385	2.23999	0.784581	2.85501	0.00430352	0.0238814
ENSG00000245025	10.2377	-2.40533	0.818283	-2.93949	0.00328756	0.0194316
ENSG00000248648	7.43224	2.41339	0.684501	3.52576	0.00042227	0.00363551
ENSG00000249019	7.03837	1.55063	0.59537	2.60448	0.00920125	0.0430923
ENSG00000249049	122.82	2.11538	0.356847	5.92797	3.06705e-09	1.1037e-07
ENSG00000249541	17.8847	2.23111	0.612216	3.64432	0.000268099	0.00249192
ENSG00000250068	4.26147	4.36085	1.26316	3.45232	0.000555785	0.00455981
ENSG00000250318	19.3576	1.52816	0.446423	3.42313	0.000619035	0.00497247
ENSG00000250602	10.7237	-1.39696	0.455474	-3.06704	0.00216191	0.0138718
ENSG00000250646	1.99743	-3.94827	1.46755	-2.69038	0.00713698	0.0355258
ENSG00000251194	1.93908	3.26348	1.27693	2.55571	0.010597	0.0480044
ENSG00000251354	23.7893	1.05976	0.335386	3.15982	0.00157868	0.0107231
ENSG00000251467	22.9954	-1.25426	0.374868	-3.34588	0.000820224	0.00627812
ENSG00000251682	3.98161	2.67105	0.951194	2.8081	0.00498344	0.026773
ENSG00000252139	155.073	-3.58322	0.262972	-13.6258	2.81135e-42	6.30277e-39
ENSG00000253991	9.85905	5.11691	1.04549	4.89428	9.86647e-07	1.99816e-05
ENSG00000254035	27.9462	2.19478	0.400602	5.47871	4.28445e-08	1.18292e-06
ENSG00000255449	2.76338	-2.87453	1.10408	-2.60355	0.00922641	0.0431652
ENSG00000256056	9.95438	2.02018	0.661084	3.05586	0.00224413	0.0142646
ENSG00000256673	17.0766	1.2432	0.442018	2.81255	0.00491507	0.0264882
ENSG00000257027	5.11835	2.04264	0.750063	2.7233	0.00646339	0.0328206
ENSG00000257464	2.54954	4.23227	1.29946	3.25694	0.00112622	0.00808216
ENSG00000257954	61.6465	1.13667	0.258393	4.39897	1.08763e-05	0.000164311
ENSG00000258824	9.98313	-1.28441	0.503655	-2.55018	0.0107666	0.0486056
ENSG00000259342	6.58257	2.8272	1.03231	2.73871	0.00616807	0.0316218
ENSG00000259381	11.5655	1.44418	0.485976	2.97171	0.00296144	0.0178187
ENSG00000259531	48.087	1.07027	0.307278	3.48305	0.000495728	0.00416357
ENSG00000259556	3.61195	2.54879	0.970837	2.62536	0.00865581	0.0412005
ENSG00000260494	8.69834	2.02725	0.729448	2.77916	0.00545001	0.0287014
ENSG00000260784	6.44015	2.62446	0.904322	2.90213	0.00370636	0.0212703
ENSG00000260899	30.2467	-1.18442	0.419304	-2.82472	0.00473217	0.0257439
ENSG00000261324	4.52585	2.82448	0.972718	2.9037	0.00368783	0.0211831
ENSG00000262202	223.848	-1.80847	0.488229	-3.70414	0.000212107	0.00205144
ENSG00000262316	4.46275	2.73935	1.05378	2.59954	0.00933495	0.0435819
ENSG00000263244	31.274	1.23639	0.407122	3.03691	0.0023902	0.0149472
ENSG00000263624	23.7086	1.10191	0.428352	2.57244	0.0100984	0.0462978
ENSG00000264044	5.58187	-2.33559	0.730432	-3.19754	0.00138604	0.00962033
ENSG00000264296	2.30277	3.52395	1.25114	2.81659	0.00485367	0.0262583
ENSG00000264772	16.9966	1.3624	0.396457	3.43645	0.000589398	0.00478002
ENSG00000265690	2.91813	3.85084	1.1415	3.37348	0.000742231	0.00577397
ENSG00000266076	10.6657	-2.12965	0.664058	-3.20702	0.00134116	0.00934641
ENSG00000266932	33.7003	2.13024	0.483287	4.4078	1.04424e-05	0.000158825
ENSG00000267102	3.31743	2.73628	1.04801	2.61094	0.00902932	0.0425091
ENSG00000267383	54.3831	1.95897	0.302461	6.47677	9.37045e-11	4.49842e-09
ENSG00000267656	4.2937	3.79666	1.15706	3.2813	0.00103331	0.00754092
ENSG00000267771	39.1617	1.96437	0.430034	4.56795	4.92518e-06	8.25383e-05
ENSG00000267904	2.55323	4.25519	1.23307	3.45089	0.000558748	0.00457831
ENSG00000268081	66.7154	1.53922	0.605502	2.54206	0.0110201	0.0494912
ENSG00000268105	7.24686	1.6738	0.654033	2.55919	0.0104916	0.0476679
ENSG00000268119	7.43978	1.69038	0.575765	2.93588	0.00332598	0.0196018
ENSG00000268205	20.7943	1.46966	0.369545	3.97694	6.98065e-05	0.000811644
ENSG00000268455	5.01877	3.47989	1.09187	3.1871	0.00143707	0.00991314
ENSG00000268461	20.3358	1.99849	0.433466	4.61049	4.01721e-06	6.87494e-05
ENSG00000269825	1151.72	1.54361	0.14889	10.3675	3.48637e-25	1.0707e-22
ENSG00000270808	11.0691	-1.49884	0.585187	-2.5613	0.0104281	0.0474312
ENSG00000271049	10.4643	4.55844	0.970917	4.69499	2.66622e-06	4.84e-05
ENSG00000271533	8.74918	1.73056	0.574013	3.01485	0.0025711	0.0158573
ENSG00000271659	1.92141	3.17521	1.23929	2.56213	0.0104033	0.0473565
ENSG00000271754	14.2238	-1.27863	0.411834	-3.10473	0.00190453	0.0125434
ENSG00000271851	2.08897	3.29487	1.24042	2.65625	0.00790149	0.0384844
ENSG00000272733	1.63426	-3.94537	1.54007	-2.56181	0.0104127	0.0473898
ENSG00000272812	6.06039	-2.46061	0.82017	-3.00012	0.0026987	0.0165081
ENSG00000273270	4.54745	2.45654	0.88904	2.76314	0.0057249	0.0298411
ENSG00000273654	58.3943	1.56127	0.432652	3.6086	0.000307859	0.00280223
ENSG00000274033	4.98503	4.09193	1.34529	3.04167	0.00235271	0.0147839
ENSG00000274422	2.91041	3.18788	1.16964	2.72552	0.00642009	0.0326525
ENSG00000275464	65.3088	-1.16969	0.331782	-3.52547	0.000422734	0.00363811
ENSG00000275956	24.3007	1.35594	0.448034	3.02642	0.00247467	0.0153768
ENSG00000276294	4.76548	3.42944	1.1495	2.98341	0.00285058	0.0172629
ENSG00000276393	40.572	-1.03791	0.31598	-3.28473	0.00102081	0.00747551
ENSG00000276620	1.65606	3.69239	1.44927	2.54776	0.0108417	0.0488758
ENSG00000276868	26.0139	1.34288	0.40985	3.27652	0.00105095	0.00764052
ENSG00000277476	21.8781	1.71974	0.446753	3.84941	0.000118403	0.00127803
ENSG00000277502	23.5586	1.81096	0.344167	5.26186	1.42608e-07	3.4865e-06
ENSG00000278543	4.46361	5.08675	1.13248	4.49168	7.06619e-06	0.000112994
ENSG00000279342	16.8387	-1.69069	0.440075	-3.84183	0.000122122	0.0013106
ENSG00000279598	26.8027	-1.14368	0.450413	-2.53918	0.0111114	0.0498113
ENSG00000279652	12.2784	1.65651	0.504458	3.28375	0.00102434	0.00748524
ENSG00000279738	10.6434	1.43855	0.490336	2.93381	0.0033483	0.0197149
ENSG00000279838	2.22789	3.39013	1.2103	2.80107	0.00509334	0.0272163
ENSG00000279933	18.4663	-1.94025	0.465118	-4.17151	3.02585e-05	0.000395318
ENSG00000279995	10.4569	2.18156	0.589118	3.70309	0.000212987	0.00205525
ENSG00000280088	2.05708	3.30695	1.20996	2.7331	0.00627415	0.0320264
ENSG00000280120	4.52889	3.35602	1.02444	3.27595	0.00105306	0.00765272
ENSG00000280187	3.38679	2.72007	1.05324	2.58257	0.00980674	0.045266
ENSG00000280239	3.525	2.372	0.924932	2.56451	0.0103322	0.0471
ENSG00000280383	13.6342	1.10055	0.427319	2.57547	0.0100105	0.0459743
ENSG00000280486	19.9234	-1.51647	0.47878	-3.16736	0.00153831	0.0104857
ENSG00000280614	311.584	3.69843	1.18813	3.11281	0.00185316	0.0122808
ENSG00000280800	232.128	5.20675	1.51212	3.44334	0.000574574	0.00468925
ENSG00000280828	13.4938	-1.7709	0.478185	-3.70337	0.000212752	0.00205413
ENSG00000281181	2457.46	4.36666	1.11564	3.91404	9.07656e-05	0.00101087
ENSG00000281195	6.60929	2.31448	0.698459	3.31369	0.000920725	0.00688977
ENSG00000281383	75.2015	2.29467	0.444565	5.16162	2.44824e-07	5.64102e-06
ENSG00000283399	26.6872	2.19807	0.558385	3.93648	8.26859e-05	0.000940028
ENSG00000283907	15.3685	1.53755	0.473508	3.24714	0.00116571	0.00832061
ENSG00000284428	37.5377	1.75162	0.358986	4.87936	1.06432e-06	2.13426e-05
ENSG00000284726	1.96212	3.98178	1.49426	2.66472	0.0077053	0.0377667
ENSG00000285417	42.5248	1.3278	0.31152	4.26233	2.0231e-05	0.000279802
ENSG00000285669	1.81117	3.83299	1.30997	2.92602	0.00343328	0.0200654
ENSG00000285751	2.40941	-3.1894	1.11747	-2.85411	0.0043157	0.023943
ENSG00000285791	4.55173	2.80652	0.911281	3.07975	0.00207175	0.01342
ENSG00000286132	34.2035	1.30931	0.34201	3.82826	0.000129051	0.00137118
ENSG00000286502	96.2037	-1.34942	0.520449	-2.59279	0.00952013	0.0442805
ENSG00000286722	2.95628	4.55716	1.29811	3.51061	0.000447082	0.00382271
ENSG00000286944	2.20225	3.45408	1.31472	2.62724	0.00860794	0.0410582
ENSG00000287002	4.29733	3.168	1.11604	2.83861	0.004531	0.0248789
ENSG00000287059	3.70144	4.84004	1.22822	3.94069	8.1246e-05	0.000926007
ENSG00000287299	11.7698	1.99619	0.522084	3.82351	0.000131566	0.00139262
ENSG00000287591	3.94041	2.55935	0.949675	2.69497	0.00703949	0.0351645
ENSG00000287626	4.66588	2.90096	0.93459	3.104	0.00190927	0.012557
ENSG00000287837	4.94226	2.30305	0.890553	2.58609	0.00970714	0.0448988
ENSG00000288066	5.00819	2.36984	0.907946	2.61011	0.00905137	0.0425771
ENSG00000288694	164.236	1.47694	0.343544	4.29914	1.71465e-05	0.000242835
ENSG00000288851	12.4755	1.37525	0.456959	3.00956	0.00261627	0.0161005
ENSG00000288953	8.70619	1.57376	0.59269	2.65529	0.00792407	0.0385441
ENSG00000289017	2.90708	3.19095	1.19687	2.66607	0.00767434	0.0376561
ENSG00000289092	3.42781	3.41585	1.11994	3.05003	0.00228819	0.0144903
ENSG00000289272	2.27554	3.45756	1.36133	2.53985	0.0110901	0.0497458
ENSG00000289523	1.69239	3.7278	1.39138	2.67922	0.00737942	0.0365128
ENSG00000290098	3.46708	2.73123	1.07225	2.54721	0.0108589	0.0489238
ENSG00000290476	2.25677	3.43314	1.19742	2.86713	0.00414217	0.0232682
ENSG00000290928	6.95821	2.62046	0.70481	3.71797	0.000200831	0.00196957
ENSG00000290998	11.4565	-6.78486	1.59061	-4.26557	1.99396e-05	0.000276454
ENSG00000291067	4.42985	-2.26251	0.768593	-2.9437	0.00324315	0.0192197
ENSG00000291130	42.361	2.01027	0.296471	6.78067	1.1962e-11	6.67107e-10
ENSG00000291131	16.5137	1.14845	0.387415	2.96439	0.00303284	0.0181703
ENSG00000291214	20.6799	1.19355	0.456077	2.617	0.0088706	0.0419557
ENTREP1	813.679	1.49421	0.297542	5.02184	5.11794e-07	1.11289e-05
EOLA1	114.22	1.07767	0.300849	3.5821	0.000340849	0.00304199
EOMES	76.2843	-1.41325	0.399283	-3.53947	0.000400936	0.00348935
EPHA2	1084.95	-1.44128	0.427851	-3.36865	0.000755366	0.00584555
EPHA3	41.1465	1.45313	0.506813	2.86719	0.00414137	0.0232682
EPHX3	18.5497	-1.54495	0.432246	-3.57424	0.000351249	0.00311991
EPPIN	2.75404	4.44747	1.48594	2.99303	0.00276223	0.0168461
EPYC	19.0881	-1.76406	0.664795	-2.65354	0.00796519	0.0387105
ERAP2	589.012	-2.54977	0.558633	-4.56431	5.01144e-06	8.37195e-05
ERICH2	54.1621	1.6728	0.272087	6.14803	7.84524e-10	3.19206e-08
ERMN	65.9083	1.96298	0.764547	2.56751	0.0102431	0.046808
ERP29	1548.45	-1.57072	0.118095	-13.3004	2.30151e-40	4.29979e-37
ERV3-1	801.709	-1.28549	0.258793	-4.96725	6.79077e-07	1.43489e-05
ERVFRD-3	4.71609	2.48271	0.947368	2.62064	0.00877642	0.0416448
ERVH48-1	27.2807	-1.973	0.374549	-5.26767	1.38167e-07	3.40017e-06
ETFRF1	30.8187	2.8699	0.524479	5.4719	4.45244e-08	1.22106e-06
ETV1	1200.1	-1.42218	0.331263	-4.29319	1.76124e-05	0.000248805
EXOC5P1	91.7794	1.3076	0.249817	5.23423	1.65677e-07	4.0025e-06
F11R	17.4882	1.58571	0.39857	3.9785	6.93525e-05	0.000806857
FAIM	184.257	1.02111	0.200801	5.08521	3.67228e-07	8.25765e-06
FAM102B	232.537	1.23603	0.187467	6.59332	4.30112e-11	2.22182e-09
FAM110A	24.9953	1.0653	0.312634	3.40751	0.000655576	0.00520813
FAM124A	56.6655	-1.27141	0.390321	-3.25734	0.00112462	0.00807584
FAM180A	4.01646	-2.59531	0.96439	-2.69114	0.00712076	0.0354818
FAM20A	1858.26	-1.24069	0.152258	-8.14863	3.68059e-16	3.96707e-14
FAM217A	6.20963	2.93328	0.934925	3.13745	0.00170424	0.0114462
FAM217B	165.995	1.4792	0.172198	8.59015	8.68573e-18	1.17304e-15
FAM222A	55.2133	-1.26966	0.347783	-3.65073	0.000261499	0.00243967
FAM234B	343.944	1.25134	0.263732	4.74473	2.0878e-06	3.90053e-05
FAM3B	14.7556	-2.02206	0.783057	-2.58226	0.0098155	0.0452786
FAM83B	86.3701	2.51248	0.628865	3.99525	6.46251e-05	0.000763748
FAM83D	507.64	1.20461	0.24319	4.95336	7.2942e-07	1.52974e-05
FARP1-AS1	9.36205	2.62684	0.63954	4.10739	4.00161e-05	0.000504
FBXL21P	13.34	1.2935	0.460645	2.80803	0.00498463	0.026773
FBXL8	68.1067	1.08875	0.341394	3.18913	0.00142702	0.00985287
FBXO17	16.4983	1.33127	0.440494	3.02222	0.00250932	0.0155619
FBXO21	1750.79	1.09036	0.281151	3.8782	0.000105234	0.00115085
FCF1P3	4.63161	3.90619	1.41743	2.75583	0.00585433	0.0303534
FCGBP	2105.4	-1.30069	0.400371	-3.24871	0.00115931	0.00828515
FCN1	40.6993	-1.68002	0.610265	-2.75294	0.00590627	0.0305019
FEM1B	538.181	1.7869	0.154794	11.5437	7.94473e-31	4.94758e-28
FEN1	279.892	2.35708	0.209378	11.2575	2.12634e-29	1.13501e-26
FGD2	82.1604	-1.26416	0.281221	-4.49525	6.94883e-06	0.000111435
FGD5-AS1	208.156	1.61702	0.184378	8.77011	1.78495e-18	2.75977e-16
FGF14	16.1888	2.05569	0.749952	2.74109	0.00612355	0.0314366
FGFR2	5559.49	-1.17926	0.41526	-2.83981	0.00451408	0.0248103
FGFR4	100.056	1.04089	0.31316	3.32382	0.000887941	0.00671617
FGL1	149.685	2.43675	0.528722	4.60875	4.05096e-06	6.92252e-05
FGL2	396.474	-2.1206	0.216721	-9.78495	1.30656e-22	2.98896e-20
FGR	97.8382	-1.53421	0.312167	-4.91469	8.8921e-07	1.82223e-05
FHL3	216.415	-1.19752	0.341746	-3.50412	0.000458127	0.00389486
FHOD3	955.732	-1.44577	0.319446	-4.52585	6.01533e-06	9.83645e-05
FICD	212.655	-1.53009	0.274717	-5.56969	2.55186e-08	7.40107e-07
FILIP1L	519.383	1.39446	0.24458	5.70144	1.188e-08	3.77248e-07
FJX1	696.085	-1.2151	0.455005	-2.67053	0.00757314	0.0372738
FKBP4P6	16.234	1.96704	0.59231	3.32096	0.000897075	0.00677156
FMC1	67.001	-1.2447	0.219134	-5.68007	1.34636e-08	4.20976e-07
FMNL1	288.011	-1.15681	0.238331	-4.85379	1.21124e-06	2.37742e-05
FN1	84944.3	1.03276	0.367517	2.81011	0.00495249	0.0266643
FNDC10	7.44187	1.70651	0.599925	2.84453	0.00444764	0.0245052
FOS	2063.1	-4.10989	0.724942	-5.66927	1.43409e-08	4.44687e-07
FOSB	189.156	-4.45704	1.0143	-4.39422	1.11172e-05	0.000167437
FOXB2	13.8309	4.43991	1.27315	3.48734	0.000487845	0.00410548
FOXE1	2.48754	-3.55349	1.24558	-2.85289	0.00433243	0.024012
FOXN3-AS1	8.07373	-1.73022	0.66183	-2.61429	0.0089413	0.0422147
FOXO3	233.311	1.87569	0.158096	11.8642	1.81558e-32	1.35678e-29
FOXO3B	54.1428	1.61352	0.292408	5.51805	3.42786e-08	9.66657e-07
FPGT	213.239	-1.01971	0.182345	-5.59219	2.24218e-08	6.59679e-07
FRG1	19.3805	6.07978	1.43944	4.2237	2.40322e-05	0.000323979
FRG1EP	13.6694	2.51509	0.812131	3.0969	0.00195557	0.0127969
FRK	260.731	1.54714	0.600346	2.57708	0.00996393	0.0457936
FRZB	92.7259	-1.11563	0.357683	-3.11906	0.00181428	0.0120588
FSBP	29.4466	2.05174	0.360988	5.68368	1.31829e-08	4.13353e-07
FSCB	7.34709	-2.46412	0.828959	-2.97255	0.00295341	0.0177847
FTCDNL1	21.6687	1.02945	0.397972	2.58674	0.0096888	0.0448232
FTH1	2766.26	1.16138	0.181549	6.39704	1.58413e-10	7.21841e-09
FTX	63.5791	1.02094	0.277366	3.68083	0.00023248	0.00220659
FUOM	31.8106	1.11896	0.290759	3.8484	0.000118893	0.00128147
FYB1	577	-1.13695	0.227367	-5.00052	5.71746e-07	1.23013e-05
FZD5	238.439	1.04405	0.30605	3.41136	0.000646386	0.00514972
GABPB1-AS1	43.8369	1.48319	0.461586	3.21324	0.00131246	0.00918355
GABPB1-IT1	16.0731	1.48006	0.48728	3.03739	0.0023864	0.0149472
GABRA3	176.858	1.27104	0.398176	3.19216	0.00141212	0.00976809
GABRE	353.971	-1.38826	0.279684	-4.96368	6.91717e-07	1.45885e-05
GAL3ST1	42.7848	-2.03241	0.34872	-5.82818	5.60335e-09	1.89761e-07
GAPDHP43	3.15286	2.68048	1.0561	2.53809	0.0111458	0.0499258
GARS1-DT	33.6322	1.37374	0.411562	3.33786	0.00084426	0.0064401
GAS6-AS1	14.2111	1.71497	0.631681	2.71492	0.00662911	0.0335027
GASK1A	114.399	-1.27458	0.221222	-5.76157	8.33365e-09	2.73546e-07
GBP5	253.073	-1.17755	0.294434	-3.99937	6.35103e-05	0.000751762
GCM2	37.4187	1.01832	0.37656	2.70426	0.00684558	0.034403
GCNT2P1	5.35874	3.03692	0.876711	3.46399	0.000532229	0.00441927
GCNT3	104.417	2.0163	0.6749	2.98756	0.00281216	0.0170763
GCSAM	16.5392	-1.24127	0.448122	-2.76994	0.00560659	0.0293747
GDAP1L1	34.0465	-1.30365	0.396729	-3.286	0.00101623	0.00745509
GDPD1	68.6417	-1.07989	0.222037	-4.86355	1.15302e-06	2.27749e-05
GEM	64.2249	-1.35488	0.405065	-3.34485	0.000823268	0.00629711
GEMIN4	696.56	-1.49647	0.107724	-13.8917	7.11432e-44	1.77218e-40
GEMIN8	399.959	-1.06384	0.139912	-7.60364	2.87922e-14	2.34568e-12
GFOD1	55.5853	-1.21504	0.360575	-3.36974	0.000752395	0.00582853
GGPS1	158.225	1.3221	0.16371	8.07591	6.69756e-16	6.88773e-14
GIMAP2	87.7508	1.69069	0.258912	6.53	6.57715e-11	3.26947e-09
GIMAP4	216.68	-1.57258	0.241594	-6.50919	7.55553e-11	3.71464e-09
GINS2	100.449	1.46578	0.28	5.23492	1.65057e-07	3.99182e-06
GJA9	36.396	2.02611	0.347175	5.83598	5.34765e-09	1.82202e-07
GJB1	609.735	2.51352	0.526992	4.76957	1.8462e-06	3.4723e-05
GJC1	234.438	2.86766	0.330417	8.67892	3.9953e-18	5.70514e-16
GLIPR1	1098.02	-1.3883	0.44594	-3.1132	0.00185068	0.0122693
GLRA2	12.373	1.57724	0.554512	2.84437	0.00445	0.0245122
GLRXP2	10.2363	5.73533	1.41802	4.04459	5.2414e-05	0.00063586
GLYATL2	22.2444	2.31663	0.56027	4.13485	3.55182e-05	0.000455493
GNG11	108.445	2.07609	0.448525	4.62871	3.67954e-06	6.37985e-05
GOLGA6L7	15.5876	2.49146	0.648611	3.84122	0.000122423	0.00131195
GOLGA8J	21.1973	-3.42123	1.01522	-3.36996	0.0007518	0.00582801
GOLGA8UP	14.1619	1.96811	0.653239	3.01284	0.00258815	0.015945
GP2	70.2638	4.83336	1.2795	3.77755	0.000158379	0.00162414
GPAT3	157.711	-1.03013	0.307468	-3.35036	0.000807075	0.00619065
GPC4	396.219	1.39126	0.357184	3.89509	9.81635e-05	0.00108357
GPC5	3.11885	3.97931	1.42551	2.79151	0.00524634	0.0278434
GPER1	76.3463	2.05247	0.342287	5.99634	2.01816e-09	7.60423e-08
GPR141	12.1427	-2.18909	0.85145	-2.57101	0.0101402	0.046423
GPR15	2.64653	-3.83988	1.42574	-2.69326	0.00707571	0.0352826
GPR160	38.4884	2.3768	0.350695	6.7774	1.22357e-11	6.79913e-10
GPR17	26.2873	-1.2433	0.412627	-3.01314	0.00258564	0.0159339
GPR173	279.173	-1.53491	0.25761	-5.95828	2.5491e-09	9.27732e-08
GPR21	87.0737	-1.61265	0.188446	-8.55762	1.15218e-17	1.50178e-15
GPR27	38.584	-1.11419	0.285368	-3.9044	9.44596e-05	0.00104629
GPR82	58.4288	-1.60929	0.249062	-6.4614	1.03738e-10	4.88592e-09
GPRC5D-AS1	9.23912	1.83789	0.647435	2.83873	0.0045293	0.0248756
GRAP2	59.7143	-1.49027	0.42263	-3.52618	0.000421595	0.0036311
GREB1L	517.05	1.04145	0.341128	3.05294	0.00226608	0.0143756
GREM2	52.1503	1.36257	0.467679	2.91348	0.00357421	0.0207055
GRHL1	193.843	1.59495	0.531722	2.9996	0.00270338	0.0165277
GRIK2	221.425	-1.06527	0.330786	-3.22042	0.00128003	0.00900438
GRIN1	30.6582	2.44392	0.714182	3.42199	0.000621652	0.00499169
GRM7	117.835	-1.30165	0.270608	-4.81009	1.5086e-06	2.89318e-05
GSDMB	384.852	-1.00032	0.198914	-5.02892	4.93258e-07	1.07363e-05
GSPT2	177.684	1.27134	0.175209	7.2561	3.98416e-13	2.8177e-11
GTF2A1	1083.46	1.45616	0.118116	12.3282	6.38647e-35	5.3029e-32
GVQW3	47.242	1.60195	0.287323	5.57544	2.46901e-08	7.20738e-07
GZMA	284.293	-1.34581	0.307961	-4.37008	1.242e-05	0.000183792
GZMH	34.2562	-1.166	0.400023	-2.91483	0.00355881	0.0206465
GZMK	47.6994	-1.71035	0.467021	-3.66225	0.000250013	0.00235209
GZMM	7.81037	-1.55933	0.5442	-2.86537	0.00416523	0.0233638
H1-1	612.621	1.17523	0.290395	4.04698	5.18823e-05	0.000630806
H1-6	9.63727	3.68295	0.881108	4.17991	2.91627e-05	0.000382115
H2AC11	6901.01	1.06848	0.156117	6.84412	7.69454e-12	4.49229e-10
H2AC12	4805.57	1.04	0.167744	6.19995	5.64817e-10	2.3406e-08
H2AC14	3608.18	1.1426	0.190928	5.98445	2.17121e-09	8.07237e-08
H2AC16	4163.91	1.13639	0.242807	4.6802	2.86591e-06	5.14419e-05
H2AC21	464.096	1.24061	0.152528	8.13365	4.16551e-16	4.4259e-14
H2AC4	830.895	1.39218	0.197811	7.03791	1.95139e-12	1.22544e-10
H2AJ	424.234	2.25273	0.205575	10.9582	6.07038e-28	2.66847e-25
H2AX	1531.94	1.06782	0.156285	6.83254	8.34257e-12	4.8157e-10
H2BC10	4091.89	1.03607	0.19212	5.39282	6.9362e-08	1.8145e-06
H2BC11	3514.72	1.10391	0.180318	6.12201	9.24031e-10	3.70588e-08
H2BC13	4301.24	0.999222	0.215928	4.62758	3.6997e-06	6.40987e-05
H2BC14	3577.17	1.40042	0.223588	6.2634	3.76667e-10	1.60542e-08
H2BC16P	3.25329	2.77707	1.07706	2.57837	0.00992685	0.0456779
H2BC17	2541.17	1.19482	0.230857	5.17557	2.27217e-07	5.27873e-06
H2BC27P	20.3644	2.67926	0.656274	4.08253	4.45478e-05	0.000555152
H2BC3	2194.36	2.11313	0.202622	10.429	1.82882e-25	5.7747e-23
H2BC4	9278.99	1.04477	0.121148	8.62396	6.46798e-18	8.89605e-16
H2BC6	5034.54	1.07826	0.168819	6.38707	1.6909e-10	7.65825e-09
H2BC7	6064.5	1.02984	0.19053	5.40514	6.47574e-08	1.71001e-06
H3-3A	1331.11	1.36915	0.0759613	18.0244	1.25413e-72	1.40582e-68
H3-5	334.38	0.995902	0.139418	7.14327	9.11372e-13	6.08097e-11
H3-7	34.082	1.87934	0.411571	4.56626	4.96511e-06	8.30692e-05
H3C1	1850.33	1.24139	0.159251	7.7952	6.43076e-15	5.80444e-13
H3C10	2619.36	1.41257	0.193487	7.30059	2.86515e-13	2.07206e-11
H3C12	656.448	1.6645	0.293082	5.67931	1.35243e-08	4.21698e-07
H3C13	451.121	1.09632	0.185879	5.89802	3.67898e-09	1.30712e-07
H3C2	4353.19	1.15336	0.190921	6.04104	1.53123e-09	5.88829e-08
H3C3	4608.3	1.39209	0.234791	5.92904	3.04709e-09	1.09828e-07
H3C6	453.349	1.93203	0.194944	9.91073	3.73917e-23	9.01382e-21
H3C8	3000.8	1.08095	0.214286	5.04443	4.54869e-07	1.00174e-05
H3P4	15.5566	1.59818	0.479267	3.33463	0.000854116	0.00650054
H4C1	910.537	1.1039	0.173867	6.34909	2.16599e-10	9.6348e-09
H4C13	522.491	1.34431	0.388676	3.45869	0.000542803	0.00449708
H4C4	1894.69	1.06109	0.135948	7.8051	5.94537e-15	5.39633e-13
H4C6	675.966	3.37482	0.337284	10.0059	1.43605e-23	3.70054e-21
H4C8	1974.94	1.29075	0.169085	7.6337	2.28107e-14	1.89405e-12
HAP1	26.2083	-1.76995	0.466508	-3.79405	0.000148211	0.00153475
HARBI1	34.1098	1.65553	0.332214	4.98333	6.25003e-07	1.32941e-05
HAVCR2	63.3901	-1.22244	0.247552	-4.9381	7.88872e-07	1.6406e-05
HBG2	15.0641	-2.76236	0.972218	-2.84129	0.00449311	0.024709
HCST	12.723	-1.93192	0.5588	-3.45727	0.000545679	0.00450745
HDAC1P2	32.2891	1.11014	0.288876	3.84296	0.000121561	0.00130646
HDC	26.0889	-1.9178	0.641837	-2.98799	0.00280823	0.0170626
HEMGN	39.3192	-1.54536	0.559031	-2.76436	0.00570346	0.0297639
HERC5	257.749	-1.15688	0.234511	-4.93317	8.0904e-07	1.67943e-05
HEY1	151.519	1.54567	0.4442	3.47967	0.000502026	0.00420587
HGD	2016.4	1.78769	0.49665	3.5995	0.000318828	0.00288026
HHIPL2	13.5797	2.29509	0.638206	3.59616	0.000322951	0.0029124
HIVEP3	99.6309	1.15101	0.228353	5.04046	4.64419e-07	1.01877e-05
HK2	1801.91	1.19874	0.25412	4.71724	2.39066e-06	4.37885e-05
HKDC1	146.588	-1.36704	0.532853	-2.56552	0.0103023	0.046973
HMCN1	4767.08	-1.03933	0.376533	-2.76027	0.00577531	0.030048
HMGB1P14	65.8018	1.61183	0.253264	6.36423	1.96269e-10	8.81796e-09
HMGB1P21	18.6996	1.22897	0.361433	3.40027	0.000673203	0.0053199
HMGB1P31	15.2152	2.08462	0.493778	4.22177	2.42387e-05	0.000326371
HMGB1P41	10.5693	2.35915	0.661415	3.56682	0.000361334	0.00318801
HMGB1P8	27.4108	1.29492	0.316396	4.0927	4.26377e-05	0.000533126
HMGCS2	8.16196	5.35627	1.34271	3.98915	6.63096e-05	0.000779719
HMGN1P1	50.6406	1.8502	0.406961	4.54638	5.4577e-06	9.05672e-05
HMGN1P2	8.81308	2.77324	0.64027	4.33135	1.48196e-05	0.00021421
HMGN1P24	6.93174	3.15431	0.836903	3.76903	0.000163886	0.00167236
HMGN1P4	152.695	1.22884	0.175229	7.01272	2.33722e-12	1.44746e-10
HMGN2	8153.11	1.02582	0.101191	10.1375	3.76706e-24	1.04264e-21
HMGN2P15	115.017	1.77615	0.523971	3.38979	0.000699459	0.00548868
HMGN2P28	64.7882	1.3274	0.363797	3.64875	0.000263518	0.00245545
HMGN2P3	19.6117	1.30376	0.40376	3.22905	0.00124204	0.00878677
HMGN2P35	32.0547	1.41027	0.380573	3.70565	0.000210849	0.00204191
HMGN2P38	45.8724	1.50656	0.282389	5.33505	9.552e-08	2.42247e-06
HMGN2P8	16.2199	1.88847	0.653007	2.89196	0.00382849	0.0218036
HNRNPA1P3	2.69186	4.42022	1.33348	3.3148	0.000917092	0.00687561
HNRNPA1P68	50.5749	1.27483	0.259134	4.91956	8.67382e-07	1.78402e-05
HNRNPA3P15	13.8084	1.54447	0.497577	3.10398	0.00190939	0.012557
HNRNPA3P3	5.37518	2.76287	0.949403	2.91011	0.00361303	0.0208818
HNRNPA3P9	21.4875	1.40106	0.351276	3.9885	6.64925e-05	0.000780469
HNRNPCP7	56.1828	1.04965	0.284611	3.68802	0.000226004	0.00215791
HNRNPH1P1	21.9506	1.87557	0.504878	3.7149	0.000203282	0.00199099
HOMER2	1377.99	1.26661	0.277116	4.57068	4.86144e-06	8.15782e-05
HOMER3	108.526	1.28331	0.250689	5.11913	3.0695e-07	7.00765e-06
HOOK1	924.492	0.998802	0.381325	2.61929	0.0088113	0.0417545
HOPX	39.9004	-1.33911	0.337352	-3.96949	7.20273e-05	0.00083365
HOXB-AS3	84.3497	1.60984	0.413808	3.89032	0.000100113	0.00110183
HOXB2	117.716	-1.19563	0.292316	-4.0902	4.31004e-05	0.000538311
HOXB7	177.993	1.29316	0.14879	8.69117	3.58719e-18	5.1552e-16
HPSE	83.6393	-1.92507	0.349028	-5.51552	3.47752e-08	9.7943e-07
HS3ST1	88.5622	-2.09549	0.389812	-5.37564	7.63113e-08	1.96873e-06
HSBP1L1	27.6002	1.10643	0.314407	3.51911	0.000432991	0.0037164
HSD17B2	140.781	5.29751	0.968151	5.47178	4.45528e-08	1.22106e-06
HSPA2	2439.83	1.04724	0.34196	3.06246	0.00219527	0.0140336
HSPA8P4	14.0053	1.39979	0.446276	3.13661	0.00170915	0.0114689
HSPD1P11	18.0634	1.62155	0.477206	3.39801	0.000678777	0.0053545
HSPD1P12	267.118	-1.43285	0.345639	-4.14552	3.3904e-05	0.000438094
HSPE1P2	46.1042	-1.10444	0.228127	-4.84134	1.28966e-06	2.50546e-05
HUS1B	9.80733	2.02919	0.663987	3.05607	0.00224256	0.0142643
ICAM1	117.888	-1.71487	0.46298	-3.70398	0.000212244	0.00205187
ICAM3	7.97107	-1.59296	0.564402	-2.82239	0.00476669	0.0259065
ID3	807.912	1.4503	0.149893	9.67558	3.82917e-22	8.41628e-20
ID4	195.188	1.42716	0.330507	4.3181	1.57377e-05	0.000225302
IDH1	4354.72	1.55919	0.437885	3.56073	0.00036983	0.00325401
IDI2-AS1	17.2468	1.55954	0.500639	3.1151	0.00183882	0.0122002
IFI44	422.471	-1.76703	0.246277	-7.17497	7.23232e-13	4.92831e-11
IFI44L	376.172	-2.20975	0.482624	-4.57862	4.68064e-06	7.88394e-05
IFI6	381.413	-1.49381	0.353945	-4.22046	2.43809e-05	0.000327892
IFITM1	708.044	-1.59448	0.336237	-4.74212	2.11489e-06	3.93474e-05
IFITM2	2708.14	1.07425	0.312384	3.43888	0.000584132	0.0047448
IGFBP2	1368.34	1.37987	0.2666	5.17581	2.2692e-07	5.27731e-06
IGFBP3	1514.59	-1.95427	0.397244	-4.91956	8.67381e-07	1.78402e-05
IGFBP6	442.036	-2.37696	0.537414	-4.42295	9.73615e-06	0.000149095
IGFN1	4391.52	-2.89797	0.842554	-3.4395	0.000582783	0.00473728
IGHV7-81	6.74254	3.43646	1.02572	3.35028	0.000807313	0.00619065
IGIP	45.1738	1.25883	0.341818	3.68275	0.000230733	0.00219398
IGLV2-8	17.8395	-3.07018	1.03614	-2.96309	0.00304568	0.0182229
IGLV5-52	11.6589	1.32932	0.517725	2.56761	0.0102401	0.046804
IGSF9B	39.4615	-1.38719	0.364439	-3.80637	0.000141021	0.00147117
IHO1	109.953	1.20838	0.31574	3.82715	0.000129635	0.00137547
IKZF3	185.255	-1.06724	0.343081	-3.11074	0.00186616	0.0123378
IL10RA	599.119	-1.24691	0.23318	-5.34743	8.92099e-08	2.27354e-06
IL12RB1	49.4052	-1.13021	0.43751	-2.58329	0.00978643	0.0451816
IL17RE	31.1011	-1.4547	0.426779	-3.40856	0.000653072	0.00519193
IL20RA	430.317	1.77841	0.472172	3.76645	0.000165585	0.00168432
IL21R	16.5624	-2.31138	0.740468	-3.12151	0.00179923	0.0119765
IL2RB	256.353	-1.25492	0.350594	-3.57941	0.000344371	0.00306732
IL2RG	17.7828	-1.29323	0.435008	-2.97288	0.00295023	0.0177799
IL6R	318.4	-1.25335	0.3042	-4.12017	3.78601e-05	0.000481171
IL7R	165.801	-1.95475	0.567182	-3.44643	0.000568052	0.00464617
ILF2P1	10.5762	2.12585	0.623538	3.40933	0.000651215	0.00518083
ILF3-DT	5.97729	2.09769	0.713134	2.94151	0.00326613	0.0193354
IMPDH1P7	2.89817	-3.04345	1.05326	-2.88955	0.00385789	0.0219406
IMPG1	10.0245	1.95289	0.729779	2.676	0.00745058	0.036808
INHBA	44.6207	-2.6707	0.756375	-3.53092	0.000414124	0.00357912
INPP5D	391.11	-1.07631	0.215145	-5.00274	5.65223e-07	1.21727e-05
INSYN1	56.0528	2.18925	0.418869	5.22656	1.72694e-07	4.13194e-06
INSYN2A	62.9805	1.27707	0.333947	3.82418	0.000131206	0.00138947
INSYN2B	17.3034	-1.50092	0.382979	-3.91906	8.88955e-05	0.00099399
IPO5P1	13.197	1.41178	0.523892	2.69479	0.00704326	0.0351715
IQCN	805.203	-1.39036	0.254043	-5.47294	4.42632e-08	1.2161e-06
IRAK2	73.9131	-1.21799	0.326168	-3.73423	0.000188287	0.00186203
IRF1	255.096	-1.52359	0.275047	-5.53938	3.0354e-08	8.67993e-07
IRF5	41.5078	-0.996974	0.354261	-2.81424	0.00488927	0.0263873
IRF6	10.3863	1.58132	0.591257	2.6745	0.00748412	0.0369249
IRS2	443.449	1.06085	0.403734	2.6276	0.00859894	0.0410533
ISCA2	36.8504	-1.04051	0.264553	-3.9331	8.38575e-05	0.000948135
ISG15	145.84	-1.53447	0.327855	-4.68034	2.86398e-06	5.14419e-05
ISM1	151.713	-1.71772	0.522287	-3.28885	0.00100596	0.00739187
ITGA10	151.694	1.36393	0.357693	3.81312	0.000137223	0.00143892
ITGA3	943.459	-1.22661	0.478833	-2.56167	0.0104169	0.0473996
ITGAL	330.699	-1.38534	0.266361	-5.20098	1.9824e-07	4.66352e-06
ITGAM	209.21	-1.10816	0.281812	-3.93226	8.41516e-05	0.000950224
ITGAX	1056.33	-1.7444	0.266271	-6.55122	5.70679e-11	2.8622e-09
ITGB2	709.464	-1.13299	0.288019	-3.93374	8.36358e-05	0.000946986
ITGB3	94.9731	-1.65379	0.488253	-3.38716	0.000706211	0.00553392
ITGB8	3664.64	1.76468	0.495511	3.56132	0.00036899	0.00324844
ITK	233.847	-1.55156	0.328388	-4.72477	2.30377e-06	4.25088e-05
ITM2A	185.604	-1.23972	0.4033	-3.07393	0.00211259	0.0136215
ITPRIPL1	12.4681	1.87326	0.600034	3.12193	0.00179671	0.0119633
ITPRIPL2	92.0659	1.52333	0.238948	6.37512	1.82814e-10	8.2465e-09
JADE2	455.913	-1.06703	0.238368	-4.47639	7.59143e-06	0.000120107
JAGN1	345.004	1.08125	0.139961	7.72532	1.1157e-14	9.65744e-13
JAK3	249.929	-1.07764	0.399381	-2.69828	0.00696992	0.0348714
JAML	201.115	-1.57074	0.444424	-3.53432	0.000408819	0.00354147
JAZF1	609.31	1.29719	0.314983	4.11829	3.81698e-05	0.000484558
JAZF1-AS1	11.9483	1.67774	0.647338	2.59175	0.00954882	0.0443326
JPT1P1	10.8482	2.38147	0.732732	3.25012	0.00115356	0.00825425
JUNB	125.333	-1.73569	0.3547	-4.89341	9.9103e-07	2.00523e-05
KBTBD6	731.691	-1.01431	0.120746	-8.40041	4.44917e-17	5.30564e-15
KCNAB3	201.499	-1.00401	0.279469	-3.59258	0.000327422	0.00294443
KCND2	184.922	-1.63441	0.415241	-3.93605	8.28348e-05	0.000941243
KCNG1	84.4852	1.99946	0.621813	3.21553	0.00130204	0.00912202
KCNJ5	31.6846	-1.88066	0.380721	-4.93973	7.82301e-07	1.62845e-05
KCNK13	47.7196	5.15947	0.988585	5.21905	1.79846e-07	4.2939e-06
KCNK6	208.799	1.32856	0.5026	2.64337	0.00820848	0.0396693
KCNN1	74.1429	1.19042	0.468504	2.54089	0.0110572	0.0496178
KHDRBS2	176.445	-1.75767	0.540029	-3.25476	0.00113487	0.00813906
KIAA0232	1324.4	1.11225	0.167033	6.65884	2.75988e-11	1.46274e-09
KIF11	1260.3	1.17505	0.255429	4.60027	4.21935e-06	7.16618e-05
KIF15	825.769	1.20819	0.205259	5.88614	3.95325e-09	1.38915e-07
KIF1A	131.19	-1.36744	0.376202	-3.63485	0.000278145	0.00257038
KIF20A	1496.81	1.28001	0.24578	5.20794	1.90948e-07	4.51568e-06
KIF21B	189.75	-1.32626	0.28451	-4.66154	3.13849e-06	5.54029e-05
KIFC3	327.277	-1.01892	0.328981	-3.0972	0.00195356	0.0127949
KLC1-AS1	9.79251	1.74817	0.527237	3.31572	0.000914086	0.00686759
KLF15	64.7735	1.52729	0.594717	2.56809	0.010226	0.0467584
KLHL11	577.229	-1.44718	0.127453	-11.3545	7.04112e-30	4.04756e-27
KLHL41	22.8635	2.47863	0.4123	6.01171	1.83574e-09	6.95195e-08
KLHL42	252.019	1.01887	0.132298	7.70131	1.34678e-14	1.14369e-12
KLK14	4.89736	1.89925	0.728817	2.60594	0.00916226	0.0429635
KLRC1	215.186	-1.28463	0.351395	-3.65581	0.000256372	0.00239986
KLRC2	72.4389	-1.91383	0.589405	-3.24705	0.00116608	0.00832061
KMT5AP2	21.268	1.37049	0.472965	2.89766	0.00375962	0.0215183
KNL1	927.561	1.12686	0.252271	4.46684	7.93823e-06	0.000124977
KRBOX5	669.643	1.0513	0.154757	6.79321	1.09665e-11	6.16188e-10
KREMEN2	12.717	1.95596	0.540106	3.62143	0.000292978	0.00269302
KRT8	11523.3	1.3177	0.373351	3.52939	0.000416526	0.00359434
KRT8P1	13.1711	1.30962	0.482332	2.71518	0.00662392	0.033484
KRT8P28	15.0802	2.6158	0.696296	3.75674	0.000172144	0.00173686
KRT8P44	13.4509	2.01804	0.5456	3.69876	0.000216652	0.00208371
KRT8P48	38.2651	2.12181	0.438104	4.84317	1.27786e-06	2.489e-05
KRT8P52	5.73929	2.5863	0.83981	3.07963	0.00207258	0.0134203
KRTAP10-12	2.25032	-4.33214	1.63578	-2.64836	0.00808839	0.0391903
KYNU	527.982	1.19914	0.43945	2.72872	0.0063581	0.0323739
L1CAM	36.2069	-2.63364	1.02359	-2.57295	0.0100837	0.046251
L3MBTL1	19.9082	-1.58801	0.40199	-3.95038	7.80288e-05	0.000893426
LAG3	41.3144	-1.32181	0.327108	-4.0409	5.32454e-05	0.000644204
LAGE3	40.1716	1.41835	0.269067	5.27138	1.354e-07	3.33575e-06
LAMB4	21.3021	1.06097	0.370275	2.86535	0.00416545	0.0233638
LAMP3	96.3268	-1.52279	0.496018	-3.07003	0.00214039	0.0137573
LAPTM5	591.178	-1.24424	0.273989	-4.5412	5.59353e-06	9.22747e-05
LAT2	56.1045	-1.69294	0.227602	-7.43818	1.02079e-13	7.83735e-12
LBH	370.528	-1.17801	0.257227	-4.57965	4.65765e-06	7.85111e-05
LCK	65.1261	-1.09371	0.334065	-3.27393	0.00106061	0.00769261
LCN12	34.9385	1.98544	0.506027	3.92358	8.72428e-05	0.000981876
LCN2	263.516	-1.47489	0.561328	-2.6275	0.00860154	0.0410555
LCP1	1746.72	-1.21711	0.224456	-5.42247	5.8782e-08	1.57072e-06
LDHD	44.7457	1.29457	0.261363	4.95316	7.30174e-07	1.52989e-05
LGALS1	2086.16	1.1028	0.24715	4.46208	8.11683e-06	0.000127253
LGI4	22.6864	-1.56146	0.417027	-3.74427	0.000180917	0.00180346
LGSN	5.58909	3.54592	1.29265	2.74315	0.00608534	0.0312879
LIMD1	251.782	1.29701	0.178972	7.247	4.26114e-13	2.98533e-11
LIN7A	95.0014	1.30336	0.203415	6.40742	1.48007e-10	6.79955e-09
LINC00342	14.7535	1.30243	0.502404	2.59239	0.00953107	0.0443047
LINC00621	69.7422	1.99039	0.662607	3.00387	0.00266568	0.0163596
LINC00665	20.4695	1.23432	0.369496	3.34057	0.000836075	0.00638419
LINC00869	5.10771	2.00874	0.730326	2.75047	0.00595098	0.0306722
LINC00882	6.35523	3.83425	1.21838	3.14701	0.00164948	0.0111284
LINC01355	11.2561	1.8088	0.572779	3.15794	0.00158889	0.0107846
LINC01521	20.2598	-1.19316	0.321222	-3.71442	0.000203669	0.00199391
LINC01541	65.2877	2.21914	0.542078	4.09377	4.24416e-05	0.00053097
LINC02035	37.3712	1.59691	0.351412	4.54428	5.51246e-06	9.13405e-05
LINC02604	27.1378	1.70938	0.36237	4.71724	2.3907e-06	4.37885e-05
LINC02649	17.8725	1.55797	0.571486	2.72618	0.00640723	0.0326018
LINC03026	16.9069	2.5045	0.618561	4.04892	5.14541e-05	0.000626929
LMOD1	326.773	-1.25834	0.282514	-4.4541	8.42464e-06	0.000131252
LPAR5	10.085	-2.99884	0.871798	-3.43983	0.000582083	0.00473466
LRATD1	102.412	1.23383	0.338428	3.64576	0.000266604	0.00248008
LRCOL1	6.34637	2.23011	0.796635	2.79941	0.00511954	0.0273274
LRP2	172.132	4.31159	0.480975	8.96426	3.12376e-19	5.30541e-17
LRP4	3973.04	2.20569	0.783814	2.81405	0.00489217	0.0263965
LRRC1	655.092	1.21432	0.334247	3.63301	0.000280132	0.00258661
LRRC10B	5.38056	3.56534	1.13276	3.14747	0.00164689	0.0111176
LRRC15	7.62686	-5.02475	1.06036	-4.73874	2.15052e-06	3.98544e-05
LRRC26	3.65927	4.2344	1.50069	2.82164	0.00477793	0.0259487
LRRC31	38.0905	2.35211	0.826095	2.84727	0.0044096	0.0243375
LRRC37A14P	9.1567	2.26124	0.625073	3.61756	0.000297391	0.00272353
LRRC4	178.151	1.76826	0.263597	6.70819	1.97048e-11	1.06706e-09
LRRC4C	151.059	-1.40738	0.359326	-3.91672	8.97612e-05	0.00100239
LRRC8B	153.125	-1.08973	0.213718	-5.09892	3.41605e-07	7.73579e-06
LRRN1	182.86	1.14129	0.390682	2.92128	0.00348596	0.020315
LRRN3	47.5439	1.61698	0.337773	4.78719	1.69133e-06	3.21066e-05
LRRN4CL	20.9896	-1.25268	0.394235	-3.17749	0.00148555	0.0101818
LRRTM1	142.897	-1.91761	0.42945	-4.46526	7.99715e-06	0.000125552
LRRTM4	84.2349	-3.71525	0.998895	-3.71936	0.000199732	0.0019605
LSP1	242.67	-1.43586	0.284198	-5.0523	4.36511e-07	9.6701e-06
LTBP2	5238.34	-1.21226	0.408062	-2.97078	0.0029704	0.017863
LUM	12351.5	-1.35128	0.236451	-5.71483	1.09813e-08	3.49703e-07
LY9	23.9868	-1.49072	0.452048	-3.2977	0.000974795	0.00721728
LYPD6	74.9769	1.26366	0.366856	3.44457	0.000571961	0.00467303
LYPLA2P3	2.90992	4.53675	1.52333	2.97817	0.00289971	0.0175083
LYZ	1203.98	-2.05044	0.48076	-4.26499	1.99908e-05	0.000276926
LZIC	405.281	0.998057	0.14535	6.86657	6.57652e-12	3.87997e-10
LZTR1	21.5873	1.92856	0.396734	4.8611	1.16736e-06	2.30378e-05
LZTS1	43.8427	1.51702	0.397332	3.81802	0.000134526	0.00141461
MACIR	57.5276	-1.39789	0.385345	-3.62762	0.000286044	0.00263577
MAD2L1BP	72.785	1.99978	0.220094	9.08603	1.02723e-19	1.81335e-17
MAFF	10.091	1.8251	0.566546	3.22146	0.00127541	0.00897754
MAGEF1	494.412	-1.2746	0.106821	-11.932	8.05653e-33	6.45069e-30
MAGEL2	154.534	-1.43545	0.292889	-4.90099	9.5353e-07	1.93985e-05
MALRD1	100.061	-1.33834	0.50251	-2.66331	0.00773765	0.0378764
MANEAL	41.5382	1.18727	0.32512	3.65179	0.000260423	0.00243065
MAP10	100.166	-1.37849	0.250676	-5.49908	3.81768e-08	1.06586e-06
MAP1B	3038.26	2.05596	0.219117	9.38296	6.41476e-21	1.27268e-18
MAP1LC3B2	74.956	1.3737	0.273925	5.01487	5.30703e-07	1.15052e-05
MAP4K1	143.125	-1.42043	0.349235	-4.06726	4.757e-05	0.000587264
MAPK1IP1L	556.176	1.49768	0.152095	9.84705	7.05884e-23	1.66581e-20
MAPK6P5	13.9971	3.95574	1.09861	3.60068	0.000317389	0.00287148
MARCKS	1251.78	1.02634	0.169797	6.04448	1.49888e-09	5.78373e-08
MATK	62.8655	-1.04507	0.373997	-2.79432	0.00520084	0.0276626
MCOLN2	173.777	0.998322	0.385723	2.58819	0.0096483	0.0447004
MECOM	4682.09	-1.33712	0.295178	-4.52988	5.90182e-06	9.66493e-05
MED21	291.697	1.05815	0.211896	4.99375	5.92185e-07	1.26681e-05
MED29	381.198	-1.05319	0.129338	-8.14292	3.85846e-16	4.13889e-14
MED7	58.5752	1.91409	0.302094	6.33608	2.35678e-10	1.03641e-08
MEDAG	39.546	2.85786	0.792971	3.60399	0.000313368	0.00284544
MEF2B	2.76179	3.09706	1.14952	2.69422	0.00705534	0.0351966
MET	2991.91	-1.10949	0.365534	-3.03526	0.0024033	0.0150008
Metazoa_SRP	15.3946	1.78534	0.453086	3.94039	8.13485e-05	0.000926703
METTL18	64.3923	-1.2048	0.287481	-4.19088	2.77878e-05	0.000368189
METTL21AP1	1.86252	3.14741	1.2354	2.54769	0.0108438	0.0488758
METTL7A	37.0575	1.95579	0.417638	4.68297	2.82743e-06	5.09135e-05
METTL8P1	8.01792	1.71464	0.602597	2.84541	0.00443538	0.0244497
MEX3C	453.189	1.57103	0.135208	11.6193	3.28668e-31	2.16718e-28
MFAP3L	163.691	1.06851	0.215061	4.96839	6.75105e-07	1.42785e-05
MFSD2A	1010.65	1.0164	0.217607	4.67081	3.00012e-06	5.35081e-05
MGAT1	705.143	-1.03781	0.144814	-7.16651	7.69335e-13	5.21079e-11
MGAT3	92.6513	2.07662	0.315778	6.57619	4.8267e-11	2.44692e-09
MGST1	619.047	1.28068	0.256161	4.99953	5.74715e-07	1.23533e-05
MICOS10	38.0901	-1.19839	0.367649	-3.25961	0.00111567	0.00803473
MIF4GD	93.2335	1.12731	0.184138	6.1221	9.23492e-10	3.70588e-08
MIF4GD-DT	18.1578	-1.59537	0.455933	-3.49914	0.000466764	0.00395509
MINDY4	7.36512	-1.95192	0.694788	-2.80938	0.00496374	0.0266991
MIR224	7.50423	-2.05616	0.563474	-3.64907	0.000263189	0.00245341
MIR340	7.6051	-1.63656	0.630652	-2.59503	0.00945831	0.0440386
MIR563	4.21325	3.15882	1.03375	3.0557	0.00224539	0.0142685
MIR601	11.0927	-1.98073	0.539183	-3.67357	0.000239183	0.00226637
MIR765	9.77281	-2.90443	0.595738	-4.87535	1.08617e-06	2.17031e-05
MIRLET7BHG	551.827	-1.06632	0.27664	-3.85452	0.000115955	0.00125523
MIS12	203.671	-1.37792	0.198686	-6.93515	4.05793e-12	2.45215e-10
MISP	106.322	-2.38986	0.575948	-4.14944	3.33286e-05	0.000431904
MKI67	21441.5	1.19987	0.219852	5.45764	4.82508e-08	1.31438e-06
MLF1	178.557	1.37299	0.318392	4.31226	1.61592e-05	0.0002306
MLXIPL	35.5608	-1.41141	0.419478	-3.36467	0.000766357	0.00592038
MME	9612.89	1.33387	0.408537	3.26499	0.0010947	0.00790404
MMP2	18382.1	-1.26029	0.266738	-4.72483	2.30313e-06	4.25088e-05
MMP7	8808.52	-2.64386	0.800403	-3.30316	0.000956026	0.00710884
MMP9	90.4961	-3.80955	1.02643	-3.71144	0.000206082	0.00200554
MOGAT1	118.318	1.62048	0.420378	3.85481	0.000115818	0.00125436
MORF4L1P3	17.0431	1.15969	0.403654	2.87298	0.0040662	0.0229276
MORN4	100.796	-1.70881	0.207338	-8.24168	1.69805e-16	1.913e-14
MPEG1	522.315	-2.52698	0.252101	-10.0237	1.19965e-23	3.16412e-21
MPST	234.032	1.04227	0.173916	5.99297	2.06041e-09	7.69874e-08
MPZL3	123.354	-1.00085	0.292687	-3.41954	0.000627274	0.00502963
MRAP2	88.9361	1.02642	0.383603	2.67574	0.00745639	0.0368286
MRPL33	172.747	-3.49468	0.16348	-21.3767	2.20066e-101	4.93367e-97
MRPL51	533.008	1.52776	0.147766	10.3391	4.69123e-25	1.42125e-22
MRPS33	474.803	-1.04804	0.184794	-5.67138	1.41651e-08	4.39845e-07
MRPS36	52.6637	-1.24339	0.228322	-5.44577	5.15826e-08	1.39665e-06
MRPS36P1	17.816	-1.0065	0.361727	-2.7825	0.00539425	0.0284617
MRPS6	194.999	-1.3352	0.206454	-6.4673	9.97724e-11	4.74904e-09
MRRFP1	4.00976	2.97811	1.15556	2.5772	0.00996057	0.0457936
MRS2P2	12.9279	1.20836	0.454029	2.66142	0.00778116	0.0380296
MS4A1	28.4369	-2.75032	0.879227	-3.12811	0.00175933	0.0117598
MS4A2	22.3218	-2.59307	0.866919	-2.99113	0.00277946	0.0169282
MSC-AS1	34.8704	-1.12601	0.348438	-3.23159	0.00123105	0.00871731
MSI1	268.75	-1.00825	0.216585	-4.65521	3.23651e-06	5.69092e-05
MSLN	164.243	-2.22993	0.842887	-2.64558	0.0081551	0.0394794
MSR1	132.118	-1.21371	0.260235	-4.66392	3.1024e-06	5.49389e-05
MSRB1	127.444	1.0729	0.218465	4.91108	9.05764e-07	1.85277e-05
MSX1	892.127	1.07468	0.132368	8.11889	4.70478e-16	4.97531e-14
MT-ATP8	66.7844	1.03254	0.345277	2.99046	0.00278561	0.0169611
MT-RNR2	306223	1.20652	0.208752	5.77969	7.48396e-09	2.47103e-07
MT-TP	13.7136	1.44972	0.506388	2.86286	0.00419839	0.0234817
MTARC2	155.796	1.17158	0.207545	5.64494	1.65243e-08	5.04024e-07
MTCL1	1103.98	2.23946	0.318518	7.03086	2.05265e-12	1.28543e-10
MTFR2P1	3.94402	2.48754	0.927851	2.68097	0.00734089	0.0363622
MTHFD2	438.316	1.24866	0.319786	3.90467	9.43527e-05	0.00104562
MTLN	7.51325	2.07372	0.730875	2.8373	0.00454962	0.0249628
MTPN	1924.7	1.03957	0.196498	5.29049	1.21991e-07	3.03543e-06
MUC15	55.2372	3.02101	0.74329	4.06438	4.81601e-05	0.000592591
MUC20P1	86.1273	-1.5512	0.593645	-2.613	0.00897505	0.0423336
MUC3A	85.1795	1.49868	0.473856	3.16273	0.00156296	0.0106279
MUC4	361.303	-3.65982	1.28105	-2.8569	0.00427804	0.0237753
MVB12A	232.576	-1.10011	0.16101	-6.83257	8.34085e-12	4.8157e-10
MX1	618.951	-2.09819	0.393565	-5.33123	9.75508e-08	2.46839e-06
MXRA7	533.199	1.06904	0.158086	6.76245	1.35682e-11	7.47383e-10
MXRA7P1	147.105	1.14573	0.186864	6.13134	8.71396e-10	3.51997e-08
MYCT1	48.7438	1.78216	0.408988	4.35749	1.31564e-05	0.000193412
MYO16	77.2437	1.22099	0.324678	3.76062	0.000169491	0.00171511
MYO18B	11.1819	3.04248	0.821212	3.70486	0.000211505	0.00204738
MYO1F	1017.02	-1.00172	0.236871	-4.22899	2.34743e-05	0.000317412
MYO1G	143.022	-1.17166	0.333083	-3.51762	0.000435442	0.00373457
MYO3B	212.074	-1.25576	0.295225	-4.25357	2.10385e-05	0.000289009
MYO7A	273.908	-1.09494	0.376593	-2.90747	0.00364363	0.0210099
MYOM2	2.26518	3.42999	1.32567	2.58737	0.00967112	0.0447876
MYRIP	164.841	1.02845	0.363232	2.83138	0.00463483	0.0253403
N4BP2L1	103.52	1.81569	0.355108	5.11308	3.16955e-07	7.22136e-06
NAGS	302.258	1.4592	0.253391	5.75868	8.47759e-09	2.77864e-07
NALF2	54.0467	1.36933	0.391993	3.49325	0.000477183	0.00402929
NAP1L1P3	188.512	1.02371	0.318268	3.21652	0.00129756	0.0091077
NAP1L4P3	8.81004	2.96096	1.03344	2.86516	0.00416804	0.0233666
NAV3	951.921	-0.99746	0.378847	-2.63288	0.0084663	0.0406176
NBL1	113.106	-1.6558	0.493567	-3.35476	0.000794343	0.00611552
NBPF7P	9.62272	2.91304	1.1051	2.636	0.00838909	0.0403248
NCAM1	287.145	-1.69018	0.442983	-3.81544	0.00013594	0.00142798
NCAPG	802.748	1.0416	0.221912	4.69374	2.68253e-06	4.85388e-05
NCF1	118.144	-1.39946	0.389379	-3.59409	0.00032553	0.00292977
NCF1C	39.4424	-2.05063	0.451465	-4.54217	5.56793e-06	9.19877e-05
NCF2	307.329	-1.07599	0.313975	-3.42701	0.00061026	0.0049196
NCLP1	19.7891	1.33459	0.458229	2.91249	0.0035856	0.02075
NCOA4P4	22.4381	-1.66567	0.524479	-3.17585	0.00149397	0.0102301
NDNF	541.224	-1.18947	0.407648	-2.91789	0.00352406	0.0204891
NDP	93.3517	1.13344	0.333483	3.3988	0.000676813	0.00534277
NDST2	8.97056	-2.23936	0.562584	-3.98049	6.87746e-05	0.000801381
NDUFA5P2	4.8366	3.44018	0.988217	3.4812	0.000499176	0.00418669
NDUFB1P1	5.40764	4.09785	1.08525	3.77595	0.000159396	0.00163323
NDUFB4P6	5.71924	1.9851	0.704203	2.81893	0.00481835	0.0261176
NECTIN3	408.186	-1.06011	0.23466	-4.51765	6.25302e-06	0.000101442
NEDD8	502.061	-1.36455	0.16088	-8.48175	2.21841e-17	2.76303e-15
NEIL3	286.631	1.14603	0.280368	4.0876	4.35856e-05	0.000543765
NFAT5	3832.5	1.11011	0.104535	10.6195	2.41886e-26	9.03805e-24
NFIL3	246.551	1.74525	0.324266	5.38217	7.35938e-08	1.91403e-06
NFKB2	570.197	-1.04751	0.245768	-4.26218	2.02446e-05	0.000279817
NFKBID	63.4843	-1.38397	0.255024	-5.42681	5.7369e-08	1.53663e-06
NKAPL	10.3253	-1.16416	0.450436	-2.58452	0.00975139	0.0450663
NLGN4Y	19.2687	6.06099	2.08455	2.90757	0.00364245	0.0210085
NLRP1	405.936	-1.09071	0.149235	-7.30871	2.69723e-13	1.96329e-11
NLRP5	2.72161	3.72405	1.39781	2.66421	0.00771689	0.0377988
NMNAT3	44.642	-1.05205	0.324787	-3.2392	0.00119867	0.00850951
NNAT	14.5395	1.63613	0.407477	4.01527	5.93785e-05	0.00070922
NOC2LP1	125.317	1.19115	0.22592	5.27243	1.34626e-07	3.32034e-06
NOG	54.5791	2.55638	0.580673	4.40244	1.0704e-05	0.000162045
NOP56	4125.16	-1.00055	0.15888	-6.29753	3.0243e-10	1.30138e-08
NOSTRIN	179.974	2.64482	0.48159	5.49185	3.97734e-08	1.10768e-06
NOX4	210.743	-1.26456	0.284965	-4.43759	9.09724e-06	0.000140462
NPIPA2	44.3767	3.58229	1.00712	3.55695	0.000375182	0.00329593
NPR3	155.57	2.19152	0.662366	3.30863	0.000937541	0.00699458
NPY1R	62.0561	-2.90436	1.1255	-2.58052	0.0098653	0.0454546
NR1D1	311.443	-1.88839	0.367946	-5.13225	2.86304e-07	6.56304e-06
NR1D2	1148.35	-1.18037	0.182388	-6.47175	9.6877e-11	4.63089e-09
NR3C2	548.066	-1.14808	0.295843	-3.88069	0.000104159	0.00114076
NRAV	9.68818	1.50287	0.548672	2.73911	0.00616064	0.0315909
NRCAM	1805.3	-1.71857	0.377503	-4.55246	5.30224e-06	8.82487e-05
NRG1	214.648	-1.45665	0.533066	-2.73259	0.00628378	0.032061
NRP2	1203.08	-1.51098	0.428259	-3.5282	0.000418401	0.00360775
NSA2P5	10.964	1.46979	0.511093	2.87578	0.00403026	0.0227536
NT5C	93.6246	1.53389	0.239884	6.39428	1.61301e-10	7.33511e-09
NTNG2	16.2854	-1.12391	0.379074	-2.96487	0.00302812	0.0181566
NUAK2	79.4181	-1.80833	0.459444	-3.93591	8.28831e-05	0.000941315
NUDT15	51.9734	1.57786	0.381597	4.13487	3.5515e-05	0.000455493
NUDT18	22.1581	1.57004	0.41437	3.78899	0.000151261	0.00155914
NUDT21	16.2217	1.08996	0.412273	2.64378	0.00819863	0.0396302
NUDT22	58.9972	-1.02363	0.233707	-4.37996	1.187e-05	0.000176468
NUGGC	26.3518	-2.92413	0.856662	-3.4134	0.000641566	0.00512042
NUTM2A-AS1	11.664	1.6664	0.600609	2.77452	0.0055283	0.0289983
NUTM2B	277.175	-1.475	0.34897	-4.22672	2.37122e-05	0.000320243
NXF3	22.7988	1.95558	0.480912	4.0664	4.77452e-05	0.000588132
NXPH3	129.601	-1.33381	0.241057	-5.53318	3.14471e-08	8.95824e-07
NXT1	120.421	1.77276	0.225674	7.8554	3.98512e-15	3.69184e-13
OAS1	202.116	-1.4317	0.296763	-4.82438	1.4044e-06	2.71191e-05
OASL	39.2929	-1.59343	0.336265	-4.7386	2.15202e-06	3.98544e-05
OCIAD2	1160.88	-1.24672	0.201929	-6.17407	6.65559e-10	2.73282e-08
ODCP	7.76093	1.69089	0.593086	2.851	0.00435823	0.0241157
ODF3	7.98813	-1.91532	0.623688	-3.07097	0.00213368	0.013726
OGFRL1	247.769	1.02961	0.187009	5.50566	3.6779e-08	1.03069e-06
OIP5-AS1	51.0991	1.82372	0.322808	5.64956	1.60864e-08	4.93352e-07
OLFML1	546.34	-1.25692	0.230862	-5.44448	5.19584e-08	1.40513e-06
OLFML2A	506.838	-1.32177	0.373166	-3.54204	0.000397041	0.00345842
OPRK1	44.4457	4.18602	1.0117	4.13762	3.50934e-05	0.000451382
OR14K1	5.84176	2.76435	0.894238	3.0913	0.00199285	0.0129915
OR1J1	20.0636	2.17566	0.557525	3.90237	9.52571e-05	0.00105408
OR1J2	28.2379	3.75833	1.42281	2.64149	0.00825425	0.039839
OR1J4	35.962	4.05191	0.817223	4.95815	7.11681e-07	1.49393e-05
OR1L8	16.1268	1.93178	0.636085	3.03699	0.00238954	0.0149472
OR1Q1	18.2249	2.74404	0.702928	3.90373	9.47196e-05	0.00104865
OR2AG1	6.61799	-1.95671	0.700939	-2.79156	0.00524544	0.0278434
OR2M2	2.87524	3.75686	1.39882	2.68573	0.00723717	0.0359278
OR51B5	9.07088	3.2617	0.755816	4.31548	1.59259e-05	0.00022756
OR51E1	11.4938	2.67518	0.705558	3.79157	0.000149696	0.00154656
OR52B6	45.4506	1.86693	0.403856	4.62277	3.78652e-06	6.54007e-05
OR52D1	14.7587	2.14425	0.545182	3.93308	8.38642e-05	0.000948135
OR52H1	28.8241	1.56656	0.385522	4.06348	4.8347e-05	0.000594239
OR52W1	5.14814	2.08087	0.792921	2.62431	0.00868251	0.0413014
OR7A5	8.1079	4.24879	1.18696	3.57955	0.00034419	0.00306693
OR7C1	11.7078	3.02809	0.873499	3.46662	0.000527039	0.0043843
OR7E100P	30.4009	1.39989	0.481584	2.90684	0.00365105	0.0210352
OSTCP6	6.23469	2.0867	0.804753	2.59298	0.00951496	0.0442748
OTUD1	48.5487	1.72156	0.281823	6.10866	1.00469e-09	3.98656e-08
OVCH1	36.1872	1.86121	0.376433	4.94434	7.64041e-07	1.59192e-05
OVGP1	1153.6	3.622	0.887447	4.08137	4.47709e-05	0.000557621
P2RX5	4.61936	-3.95452	1.05101	-3.76259	0.000168162	0.00170563
P2RY10	23.3739	-2.80655	0.568471	-4.93702	7.9325e-07	1.64818e-05
P2RY12	9.71184	-1.36591	0.515403	-2.65019	0.00804474	0.039021
P2RY13	26.2583	-1.81513	0.594619	-3.05259	0.00226873	0.0143883
PABPC5	62.3163	2.45963	0.305037	8.06338	7.42141e-16	7.52854e-14
PADI2	29.3097	-2.7521	0.506025	-5.43868	5.36775e-08	1.44639e-06
PAEP	1337.04	-3.4972	1.13798	-3.07316	0.00211805	0.0136489
PAG1	396.3	-1.33729	0.31088	-4.30164	1.69538e-05	0.000240561
PAGE4	296.78	1.52219	0.335646	4.5351	5.75759e-06	9.4633e-05
PAH	163.606	-1.15974	0.39782	-2.91523	0.00355423	0.0206324
PAK5	72.6006	2.37124	0.518451	4.5737	4.79191e-06	8.0532e-05
PALMD	685.531	-1.3401	0.154696	-8.66276	4.60471e-18	6.45206e-16
PAPSS1	4828.55	1.35408	0.229604	5.89748	3.69091e-09	1.30721e-07
PAQR5	54.1934	2.13193	0.459736	4.6373	3.52988e-06	6.15847e-05
PAQR7	91.4462	-1.43539	0.203453	-7.05517	1.72384e-12	1.09172e-10
PARK7P1	14.8395	1.61676	0.582755	2.77434	0.0055314	0.0290078
PARP15	73.4671	-1.08934	0.282394	-3.85753	0.000114537	0.00124127
PARS2	43.5734	2.69925	0.310415	8.69559	3.45021e-18	4.99033e-16
PARVG	287.881	-1.17561	0.296516	-3.96475	7.34716e-05	0.000849489
PATL2	68.007	-1.24572	0.279359	-4.45922	8.22566e-06	0.000128689
PAX9	5.02528	4.65647	1.36009	3.42364	0.000617894	0.00496508
PBXIP1	1610.64	-1.34434	0.137138	-9.80283	1.09475e-22	2.53023e-20
PCAT1	9.79948	1.8691	0.665269	2.80954	0.00496123	0.0266921
PCBP1-AS1	50.7118	1.1885	0.255754	4.64706	3.36706e-06	5.89275e-05
PCBP2P1	8.84252	1.53909	0.575933	2.67234	0.0075324	0.0371385
PCCA-DT	3.95	3.12994	1.10687	2.82774	0.00468772	0.0255641
PCDHAC2	42.4857	-1.78573	0.334787	-5.33392	9.61141e-08	2.43478e-06
PCDHB8	268.23	-1.38378	0.282311	-4.90162	9.50516e-07	1.93724e-05
PCDHGA6	695.148	-1.13519	0.283435	-4.00511	6.1988e-05	0.000735686
PCDHGA7	293.627	1.14329	0.310672	3.68006	0.000233175	0.00221225
PCDHGB2	335.689	-1.46774	0.260864	-5.62648	1.83929e-08	5.56478e-07
PCDHGB3	384.726	-1.45815	0.325153	-4.4845	7.3086e-06	0.000116042
PCDHGC5	52.6178	1.16921	0.357066	3.27449	0.00105854	0.00768091
PCED1B	22.2302	2.25664	0.511649	4.41052	1.0312e-05	0.000157056
PCNA	817.957	1.02783	0.21227	4.8421	1.28475e-06	2.49858e-05
PCOLCE2	15.37	-1.4615	0.55598	-2.62869	0.00857135	0.0409725
PCSK6	487.291	2.53435	0.742742	3.41215	0.000644526	0.00514039
PCTP	177.486	1.60763	0.355682	4.51985	6.18837e-06	0.00010068
PDCL3P2	32.2909	1.873	0.412711	4.53829	5.67127e-06	9.32826e-05
PDE4B	217.972	-1.17409	0.342229	-3.43073	0.000601955	0.00486139
PDE6A	39.1859	1.76624	0.574898	3.07226	0.00212443	0.0136787
PDGFD	264.532	-1.31796	0.462028	-2.85256	0.00433689	0.0240308
PDPR2P	116.059	-1.16152	0.228962	-5.07297	3.91661e-07	8.74566e-06
PDSS1P1	53.4437	1.06221	0.249815	4.25197	2.11897e-05	0.000290552
PDZD2	1253.29	1.07904	0.345469	3.1234	0.00178774	0.0119158
PEBP4	48.4048	3.67785	0.939761	3.9136	9.093e-05	0.00101219
PEF1-AS1	4.32918	-3.85921	1.09514	-3.52394	0.000425174	0.00365771
PER3	1628.88	-1.55567	0.305419	-5.09358	3.51366e-07	7.92482e-06
PERP	444.098	1.09198	0.219068	4.98467	6.2069e-07	1.32149e-05
PFN1P6	3.44146	2.82109	1.03624	2.72242	0.00648051	0.0328926
PGK2	13.7684	4.6269	1.31425	3.52056	0.000430637	0.00370045
PGM5	149.59	-1.05767	0.269028	-3.93146	8.44331e-05	0.000952645
PGRMC2	448.079	1.13448	0.118474	9.57581	1.01066e-21	2.1579e-19
PHACTR3	24.0848	2.97146	0.853734	3.48054	0.000500404	0.00419543
PHC2	902.986	-1.02485	0.269215	-3.80682	0.000140764	0.00146918
PHETA2	17.6265	1.54407	0.403962	3.82232	0.000132199	0.00139801
PHLDA1	353.256	1.61	0.384249	4.19	2.78952e-05	0.00036908
PHLDB2	472.905	-1.01579	0.30894	-3.28799	0.00100907	0.00740986
PHOSPHO2	45.0473	2.586	0.398637	6.48711	8.74958e-11	4.22752e-09
PIK3C2G	287.268	1.70693	0.592075	2.88297	0.00393944	0.0223082
PIK3CD-AS1	16.215	-1.05502	0.415091	-2.54167	0.0110326	0.0495372
PIK3CG	168.246	-1.05013	0.285509	-3.67811	0.000234969	0.00222833
PIK3R6	94.1388	-1.02518	0.289394	-3.54252	0.000396331	0.00345464
PILRA	57.2637	-1.01885	0.38553	-2.64273	0.00822412	0.0397363
PIMREG	70.4768	1.06792	0.236725	4.51121	6.44602e-06	0.000104266
PITPNM3	540.883	0.998222	0.38478	2.59427	0.00947926	0.044127
PKD1L1	73.7159	-1.22907	0.314215	-3.91156	9.17035e-05	0.00101979
PKD1P2	29.329	2.35474	0.836367	2.81544	0.00487109	0.0263398
PKD2L2-DT	13.029	-1.61283	0.460924	-3.49912	0.000466799	0.00395509
PKDREJ	26.5964	1.49675	0.46722	3.20351	0.00135761	0.00944932
PKHD1	621.675	-1.39403	0.520417	-2.67868	0.00739131	0.0365635
PKHD1L1	13134	2.98338	0.770961	3.86969	0.000108972	0.00118882
PKIB	23.5327	-2.39596	0.645884	-3.70958	0.000207605	0.00201659
PKP4	4354.67	-1.0546	0.246874	-4.27181	1.93895e-05	0.000269996
PKP4-AS1	10.5691	-1.45188	0.542329	-2.67713	0.00742562	0.0366928
PLA2G4D	9.97873	1.67115	0.648835	2.57562	0.010006	0.0459683
PLA2G4F	195.255	5.79668	1.47373	3.93333	8.37786e-05	0.000948124
PLAAT1	14.7651	1.36745	0.520474	2.62732	0.00860611	0.0410582
PLAC4	127.372	1.81862	0.200297	9.07962	1.08953e-19	1.8935e-17
PLAGL1	697.16	-1.00002	0.242903	-4.11694	3.83931e-05	0.000486566
PLAGL2	124.973	1.65106	0.190766	8.65489	4.93369e-18	6.87009e-16
PLCB2	426.157	-1.52142	0.181826	-8.36742	5.88917e-17	6.94891e-15
PLCE1-AS1	7.59444	-2.08952	0.543863	-3.842	0.000122038	0.00131033
PLD1	650.653	-1.14109	0.300558	-3.79657	0.000146712	0.00152134
PLEKHB1	70.1087	1.54924	0.43076	3.59652	0.0003225	0.00290951
PLEKHG6	47.5781	-1.0918	0.361906	-3.01681	0.0025545	0.0157941
PLIN3	374.916	1.00309	0.184351	5.44121	5.2921e-08	1.42772e-06
PLPP3	502.172	-1.27009	0.281141	-4.51764	6.25332e-06	0.000101442
PLPP4	14.0169	-2.3399	0.808928	-2.89259	0.00382074	0.0217791
PLPP6	89.2081	-1.35538	0.184973	-7.32745	2.3458e-13	1.71865e-11
PLXDC1	468.863	-1.73618	0.381165	-4.55494	5.24014e-06	8.73448e-05
PLXNC1	779.498	-1.19647	0.218476	-5.47642	4.34029e-08	1.19557e-06
PMAIP1	41.417	-1.35701	0.40788	-3.32699	0.000877908	0.00664926
PMF1	67.2459	-1.30276	0.233823	-5.57156	2.52465e-08	7.34113e-07
PNCK	142.668	-1.10659	0.375777	-2.94481	0.0032315	0.0191659
PNMA2	62.7118	-1.3526	0.277536	-4.87361	1.09578e-06	2.18054e-05
PNMA8A	191.772	-1.8285	0.161932	-11.2918	1.4405e-29	7.87673e-27
POC1B-AS1	10.2392	1.92382	0.563228	3.41571	0.000636164	0.0050877
POGLUT2P1	26.283	1.3019	0.447168	2.91143	0.00359774	0.0208042
POLA2	46.5266	-1.05654	0.307006	-3.44142	0.000578661	0.00471574
POLE4	251.146	1.91558	0.171686	11.1575	6.5814e-29	3.27885e-26
POLR2H	785.331	-0.999984	0.0993047	-10.0699	7.50875e-24	2.02818e-21
POLR2J2	15.103	-1.90022	0.60693	-3.13088	0.00174285	0.0116566
POLR2KP1	2.40281	3.46925	1.36238	2.54647	0.0108819	0.0489882
POLR2MP1	8.79122	2.36288	0.627119	3.76783	0.000164672	0.00167732
POLR3GL	241.234	1.36713	0.176165	7.76047	8.46124e-15	7.52748e-13
POLR3H	146.942	-1.30902	0.189563	-6.90544	5.00491e-12	2.99214e-10
POTEH	7.58263	4.06176	1.08841	3.73182	0.000190102	0.00187739
POTEM	11.2596	3.61994	0.825875	4.38316	1.16972e-05	0.000174541
POU2AF3	74.8722	1.35045	0.365138	3.69847	0.000216901	0.00208521
PP2D1	45.2227	-1.1467	0.290241	-3.95086	7.78696e-05	0.000892515
PPBP	3.52004	-5.89175	1.74258	-3.38105	0.00072209	0.00564454
PPIAP22	101.624	1.06379	0.221501	4.80265	1.56583e-06	2.99525e-05
PPIAP35	4.56325	2.37056	0.853792	2.77651	0.00549459	0.0288767
PPIAP36	17.2876	1.37124	0.456557	3.00344	0.00266943	0.0163692
PPIAP4	7.52044	2.14888	0.820032	2.62049	0.00878038	0.041652
PPIAP41	22.323	2.33538	0.395987	5.89763	3.68757e-09	1.30721e-07
PPIAP46	27.4421	1.96648	0.611524	3.21571	0.00130123	0.00911921
PPIAP52	22.6201	1.2059	0.338615	3.56128	0.000369052	0.00324844
PPIAP53	195.843	1.2316	0.266233	4.62602	3.72767e-06	6.45334e-05
PPIAP54	19.1779	1.69026	0.398717	4.23924	2.24281e-05	0.000305249
PPIAP58	13.3502	1.8918	0.56854	3.32747	0.000876374	0.00663988
PPIAP64	53.7358	1.0684	0.275811	3.87367	0.00010721	0.00117018
PPIAP66	38.9434	3.7811	0.554513	6.81877	9.18218e-12	5.22476e-10
PPIAP67	6.43486	1.73281	0.656827	2.63815	0.00833605	0.0401257
PPIAP71	24.3311	1.2335	0.370271	3.33135	0.000864271	0.00655927
PPIAP90	36.4213	1.57167	0.369165	4.25737	2.06846e-05	0.000284496
PPIAP91	41.0751	1.33024	0.326149	4.07864	4.53007e-05	0.000562657
PPIEL	32.8854	1.00999	0.318311	3.17297	0.00150888	0.0103164
PPM1B	254.259	2.17878	0.388019	5.61513	1.96413e-08	5.88689e-07
PPM1E	27.4346	1.37075	0.431745	3.17489	0.00149891	0.0102608
PPP1R14A	164.645	2.82447	0.30678	9.20684	3.35859e-20	6.17183e-18
PPP1R1B	69.8462	2.57191	0.577929	4.45022	8.57841e-06	0.000133278
PPP1R1C	3.1871	3.3144	1.14374	2.89787	0.00375712	0.0215094
PPP1R8P1	11.6805	2.30839	0.56091	4.11544	3.86441e-05	0.000488918
PPRC1	1742.3	-1.44977	0.167321	-8.66463	4.52969e-18	6.38687e-16
PRAM1	67.4997	-1.0927	0.283758	-3.85081	0.000117726	0.00127134
PRDM8	65.1109	-1.45309	0.476932	-3.04675	0.00231332	0.0146132
PRDX1P1	21.5406	1.16355	0.40917	2.84369	0.00445946	0.0245583
PRDX3P4	10.6309	1.66368	0.619258	2.68657	0.00721903	0.035874
PRECSIT	20.226	2.19615	0.506109	4.33928	1.42948e-05	0.000207696
PREX2	1872.58	-1.03267	0.306487	-3.36939	0.000753342	0.00583189
PRF1	301.381	-1.22838	0.251889	-4.87667	1.07891e-06	2.15966e-05
PRKAG2	883.519	1.15826	0.249897	4.63496	3.57004e-06	6.22369e-05
PRKX	1122.61	1.2221	0.338784	3.60733	0.000309369	0.00281255
PROC	28.8863	-1.03128	0.388132	-2.65704	0.00788301	0.0384278
PROM1	1177.28	-1.22604	0.374946	-3.2699	0.00107587	0.00778814
PRR15L	48.6565	1.27455	0.408701	3.11855	0.00181742	0.0120761
PRR22	13.7605	-1.72701	0.444904	-3.88176	0.000103701	0.00113686
PRRT3	109.939	-1.34766	0.190066	-7.09048	1.33651e-12	8.68499e-11
PRSS23	2948.48	-1.8481	0.505525	-3.65581	0.000256375	0.00239986
PRTG	757.294	-1.02784	0.232815	-4.41483	1.01092e-05	0.000154175
PSG1	27.1936	1.19618	0.406684	2.9413	0.00326841	0.0193439
PSG5	16.2561	1.60236	0.46787	3.4248	0.000615244	0.00494892
PSG7	25.0828	1.3759	0.485309	2.83511	0.00458103	0.0250983
PSMA6	26.6378	2.37525	0.430871	5.51267	3.53439e-08	9.92952e-07
PSMC1P3	7.26383	4.59752	1.53366	2.99774	0.00271988	0.0166059
PSMD10P1	72.3647	1.27328	0.291921	4.36172	1.29042e-05	0.000189954
PSMG3	23.8704	-2.24758	0.379216	-5.9269	3.08706e-09	1.10912e-07
PSMG3-AS1	13.7259	2.08265	0.749318	2.7794	0.00544596	0.0286873
PSTPIP1	154.463	-1.46831	0.268116	-5.47639	4.34092e-08	1.19557e-06
PTENP1	18.5576	1.43702	0.503228	2.85561	0.00429543	0.0238502
PTGER4	29.0562	-1.15146	0.32111	-3.58586	0.00033597	0.00300443
PTGIS	78.7497	-2.16355	0.649123	-3.33304	0.000859033	0.00652394
PTGR2	41.5922	1.16615	0.315514	3.69605	0.000218984	0.00210162
PTPMT1	105.041	1.5457	0.218112	7.08672	1.37329e-12	8.89818e-11
PTPN22	124.985	-1.23396	0.278566	-4.42967	9.43794e-06	0.000145023
PTPN7	88.1829	-1.81904	0.369113	-4.92813	8.30183e-07	1.71538e-05
PTPRC	1548.08	-1.27287	0.272062	-4.67859	2.88855e-06	5.17654e-05
PTPRE	207.14	-1.17052	0.380763	-3.07414	0.00211109	0.0136197
PTPRK	42.3932	3.93516	0.686166	5.735	9.75141e-09	3.15464e-07
PTS	509.803	1.45244	0.343126	4.23297	2.30627e-05	0.000312224
PUF60	12.7973	3.46516	0.933721	3.71113	0.000206337	0.00200689
PURB	191.587	2.21938	0.177947	12.4721	1.05935e-35	9.49984e-33
QRFP	8.38904	-1.77028	0.508978	-3.47811	0.000504969	0.00422737
QSOX1	1475.19	-1.24251	0.374604	-3.31686	0.000910348	0.00684869
RAB13	54.0201	-1.48848	0.400865	-3.71318	0.000204675	0.00199752
RAB30-DT	8.64812	1.86334	0.580414	3.21036	0.0013257	0.00926173
RAB33B-AS1	9.4038	1.28238	0.504007	2.54437	0.0109474	0.0492335
RAB37	36.7273	-1.37864	0.465256	-2.96319	0.00304464	0.0182215
RAB40A	27.3482	-1.10402	0.327279	-3.37332	0.000742672	0.00577522
RAB40B	210.219	1.15119	0.225302	5.10955	3.22933e-07	7.33783e-06
RAB5CP1	6.29266	2.17363	0.782694	2.77711	0.00548438	0.0288422
RAB6C-AS1	20.7537	-1.13299	0.427987	-2.64726	0.00811458	0.0393087
RAB9A	64.983	1.4449	0.227636	6.3474	2.18986e-10	9.72168e-09
RAB9B	25.2799	-1.58107	0.490297	-3.22472	0.00126095	0.00889247
RAD51AP1P1	8.62572	2.54055	0.684382	3.71218	0.000205485	0.00200253
RAI2	244.334	2.23815	0.198164	11.2944	1.39795e-29	7.83517e-27
RANBP17	1596.93	1.2974	0.362931	3.57478	0.00035052	0.0031159
RAP1A	579.627	1.20739	0.177661	6.79601	1.07555e-11	6.07373e-10
RAP1AP	25.6843	2.73169	0.442839	6.16859	6.89001e-10	2.8239e-08
RARRES1	148.946	-1.30764	0.404925	-3.22932	0.00124083	0.008781
RARRES2	542.728	-1.00381	0.242969	-4.13143	3.6052e-05	0.000461067
RASAL3	128.241	-1.44267	0.315571	-4.57161	4.83995e-06	8.12785e-05
RASD1	550.299	1.01627	0.309359	3.28508	0.00101954	0.00747455
RASGEF1B	389.283	1.74459	0.530146	3.29078	0.000999108	0.00734875
RASGRP1	380.362	-1.5981	0.237588	-6.72635	1.73967e-11	9.51258e-10
RASGRP4	24.5445	-1.00639	0.339219	-2.96679	0.00300929	0.0180582
RASSF3	149.749	1.04295	0.166901	6.24892	4.13289e-10	1.75484e-08
RASSF5	92.5295	-1.03429	0.32161	-3.21598	0.00129998	0.0091133
RASSF8-AS1	7.51645	2.4613	0.721563	3.41108	0.000647071	0.00515335
RBBP4P4	67.0642	2.09027	0.320218	6.52765	6.68091e-11	3.30639e-09
RBM12	1383.62	1.96297	0.139006	14.1215	2.79905e-45	8.96454e-42
RBM12B-AS1	72.5667	1.75566	0.26657	6.58613	4.51426e-11	2.31062e-09
RBM4	622.248	-1.16681	0.122878	-9.49566	2.18816e-21	4.54225e-19
RBM7	307.76	-1.19272	0.112618	-10.5908	3.28763e-26	1.1888e-23
RBM8A	96.6341	-1.02168	0.239949	-4.25793	2.06328e-05	0.000284132
RBMXP1	20.1622	1.53712	0.390908	3.93219	8.41761e-05	0.000950224
RBMXP4	28.0689	1.66274	0.470877	3.53116	0.000413734	0.00357713
RCAN3	87.8361	1.25529	0.235755	5.32455	1.01204e-07	2.54075e-06
RCN1	790.724	1.81691	0.348272	5.21694	1.81906e-07	4.33385e-06
RCN2	948.35	1.03601	0.296949	3.48885	0.0004851	0.00408391
REM1	91.2613	-2.23196	0.404223	-5.52159	3.35938e-08	9.50933e-07
REN	47.9027	2.20137	0.747097	2.94656	0.00321331	0.0190731
REV3L	11613.4	1.25276	0.299386	4.18443	2.85878e-05	0.00037568
REXO5	214.33	1.00251	0.237748	4.21672	2.47887e-05	0.000331982
RGS1	34.2454	-2.38448	0.592098	-4.02717	5.64514e-05	0.000680421
RGS18	19.805	-2.45162	0.660264	-3.71308	0.00020475	0.00199752
RGS4	537.611	-2.13813	0.536573	-3.98478	6.75438e-05	0.000790326
RGS6	67.3185	1.67623	0.564179	2.97109	0.00296744	0.01785
RGS9	69.7316	-1.05204	0.362512	-2.90209	0.00370681	0.0212703
RHOA	638.026	1.90942	0.123525	15.4577	6.69553e-54	2.50178e-50
RHOH	16.5888	-3.37747	0.588279	-5.74128	9.39635e-09	3.04417e-07
RHOQ	112.839	1.77278	0.190409	9.31038	1.27377e-20	2.50497e-18
RHOQP1	16.4711	1.67792	0.418995	4.00463	6.21137e-05	0.000736787
RHOQP2	5.75109	3.18255	0.900635	3.53367	0.00040983	0.00354748
RHOU	855.223	1.36198	0.378254	3.6007	0.000317365	0.00287148
RIC3	71.0347	-2.11026	0.440013	-4.7959	1.61942e-06	3.08461e-05
RIOX1	327.945	-1.56528	0.117959	-13.2696	3.47292e-40	5.56139e-37
RIPK3	61.5136	1.00593	0.28015	3.59067	0.00032983	0.00296015
RIPOR3	296.008	-1.35129	0.309791	-4.36196	1.28903e-05	0.000189873
RIPPLY3	13.7773	2.16008	0.517247	4.17612	2.9653e-05	0.000388085
RN7SKP80	10.9709	1.26687	0.465816	2.71967	0.00653467	0.0331225
RN7SL1	2774.99	2.05952	0.286843	7.17994	6.97395e-13	4.78131e-11
RN7SL3	27.3675	3.37757	0.508978	6.636	3.22317e-11	1.68439e-09
RN7SL396P	2.65634	3.78445	1.43991	2.62825	0.00858258	0.041
RN7SL4P	37.7832	2.62871	0.47579	5.52494	3.296e-08	9.34173e-07
RN7SL674P	2.31745	3.53534	1.20593	2.93162	0.00337198	0.0198208
RN7SL752P	2.95881	3.24548	1.1768	2.75787	0.00581786	0.0301978
RNA5-8SN3	55.7137	7.6096	1.56781	4.85365	1.21209e-06	2.37742e-05
RNA5S12	2.44936	4.28983	1.24314	3.45079	0.000558938	0.00457831
RNA5S4	6.98566	5.12223	1.79614	2.8518	0.00434718	0.02407
RNA5S9	761.531	3.05663	0.546049	5.59771	2.17199e-08	6.43247e-07
RNA5SP141	6.9922	4.57692	1.14265	4.00554	6.18752e-05	0.000734735
RNA5SP145	150.191	2.53894	0.566254	4.48375	7.33422e-06	0.000116366
RNA5SP149	32.8371	3.10954	0.548655	5.66756	1.44845e-08	4.47907e-07
RNA5SP202	40.9675	3.5142	0.612817	5.7345	9.77986e-09	3.15929e-07
RNA5SP226	86.5191	2.58498	0.524026	4.93293	8.10058e-07	1.67999e-05
RNA5SP298	3.03141	3.26284	1.19105	2.73945	0.00615413	0.0315647
RNA5SP429	10.3018	3.0189	0.731246	4.12843	3.65244e-05	0.000466109
RND2	38.2831	1.11032	0.378681	2.93208	0.00336703	0.0197969
RNF125	21.6666	1.52348	0.585056	2.60399	0.00921465	0.0431428
RNF139	288.11	1.0329	0.172691	5.98121	2.21485e-09	8.19384e-08
RNF139-DT	2.30862	3.39694	1.27007	2.67461	0.00748163	0.0369207
RNF169	672.142	1.37131	0.140733	9.74405	1.956e-22	4.38515e-20
RNF227	23.1748	-1.46493	0.308804	-4.7439	2.0964e-06	3.91008e-05
RNF24	173.96	-1.03839	0.151378	-6.85962	6.90442e-12	4.06273e-10
RNF32-DT	17.0736	-1.17234	0.406427	-2.8845	0.00392037	0.0222238
RNF6	441.445	1.175	0.164163	7.15752	8.21525e-13	5.5143e-11
RNF7P1	15.8453	2.63624	0.87177	3.02401	0.0024945	0.0154867
RNU4-1	75.7129	1.22476	0.461253	2.65529	0.00792399	0.0385441
RNU5A-1	103.794	1.02681	0.388692	2.6417	0.00824915	0.0398315
RNU5B-1	97.568	1.23613	0.422659	2.92465	0.00344845	0.020133
ROBO2	1110.03	-1.03084	0.299365	-3.44342	0.000574409	0.00468925
RORB-AS1	4.86506	4.63105	1.16135	3.98766	6.67272e-05	0.000782404
RPEP3	11.8385	1.29322	0.468658	2.75942	0.00579041	0.0301126
RPEP4	15.9386	1.80873	0.513318	3.5236	0.000425731	0.00366109
RPF2P1	18.7334	1.45522	0.529086	2.75045	0.00595138	0.0306722
RPL10AP6	30.465	1.32257	0.332077	3.98273	6.81286e-05	0.000795094
RPL13AP20	13.1126	1.44392	0.447411	3.22728	0.00124975	0.00882736
RPL17	37.8594	-1.10595	0.284559	-3.88656	0.000101675	0.00111683
RPL17P17	17.7032	1.77643	0.47601	3.73192	0.000190023	0.00187739
RPL21P11	2.59917	2.99718	1.14601	2.61532	0.00891446	0.0421187
RPL21P16	18.9987	1.21123	0.458522	2.6416	0.00825163	0.0398349
RPL21P65	11.3768	1.7638	0.471181	3.74336	0.000181573	0.00180679
RPL21P99	2.16827	3.37337	1.25806	2.6814	0.00733159	0.0363242
RPL23A	3602.43	1.22236	0.11256	10.8596	1.79564e-27	7.31935e-25
RPL23AP11	58.8756	1.32108	0.305164	4.32908	1.49733e-05	0.000216014
RPL23AP14	9.0712	2.86155	0.636783	4.49376	6.99767e-06	0.000112058
RPL23AP17	6.41233	3.39319	1.04155	3.25782	0.00112273	0.00806748
RPL23AP23	3.28158	2.79031	1.08287	2.57677	0.00997282	0.0458251
RPL23AP30	3.45603	4.09368	1.13608	3.60334	0.00031415	0.00285139
RPL23AP52	32.0297	1.04482	0.298676	3.49818	0.000468449	0.00396308
RPL23AP55	8.2544	2.31015	0.766458	3.01406	0.00257779	0.0158942
RPL23AP58	217.403	1.35665	0.298422	4.54607	5.46569e-06	9.06325e-05
RPL23AP64	107.423	1.11446	0.246009	4.53016	5.89382e-06	9.65888e-05
RPL23AP7	25.4734	1.57839	0.59266	2.66324	0.0077393	0.0378764
RPL23AP83	12.27	1.68845	0.567987	2.97269	0.00295202	0.0177847
RPL23P8	96.3543	-1.25339	0.18692	-6.70546	2.00775e-11	1.08201e-09
RPL26P19	91.8248	1.73271	0.238187	7.27458	3.47503e-13	2.47323e-11
RPL26P27	8.06059	1.81475	0.666803	2.72156	0.00649741	0.0329709
RPL26P35	20.204	1.29235	0.432006	2.99151	0.00277603	0.0169119
RPL30P2	2.43781	4.24036	1.32673	3.19609	0.00139304	0.00965593
RPL35AP27	2.69831	3.69119	1.25081	2.95103	0.0031672	0.0188344
RPL35AP31	2.24812	3.45895	1.29479	2.67143	0.00755282	0.0371902
RPL35P3	3.9463	3.69519	1.07816	3.42731	0.000609584	0.00491592
RPL36AP15	2.05394	3.94622	1.29885	3.03825	0.00237956	0.0149224
RPL36AP32	2.03002	3.32417	1.25403	2.6508	0.00803012	0.0389585
RPL36AP33	4.27713	2.34115	0.865191	2.70593	0.00681131	0.0342767
RPL36AP41	24.804	1.56137	0.592494	2.63525	0.0084076	0.0403792
RPL36AP54	2.81687	3.19601	1.19339	2.67808	0.00740445	0.0366043
RPL39P3	215.466	2.03388	0.400517	5.07814	3.81144e-07	8.53633e-06
RPL41	1007.19	3.34514	0.282223	11.8528	2.08075e-32	1.50478e-29
RPL4P3	22.5632	2.68261	0.99382	2.69929	0.00694879	0.0347812
RPL4P6	29.0562	1.74914	0.441949	3.95778	7.56496e-05	0.000871078
RPL5P1	48.86	1.17745	0.401343	2.93377	0.0033487	0.0197149
RPL6P24	10.73	1.288	0.461483	2.791	0.0052546	0.027856
RPL6P6	4.71545	3.38493	1.03305	3.27663	0.00105055	0.00764052
RPL7AP48	5.16925	2.61552	0.919124	2.84566	0.00443189	0.0244485
RPL7L1	811.684	1.07361	0.150365	7.14001	9.33275e-13	6.20863e-11
RPL7L1P2	15.428	1.35964	0.47222	2.87925	0.00398624	0.0225446
RPL7P17	16.72	1.34758	0.440294	3.06064	0.00220867	0.0140991
RPL7P19	8.8369	-2.42128	0.71916	-3.36682	0.000760412	0.00587851
RPL7P7	53.0539	-1.07288	0.260657	-4.11605	3.85417e-05	0.000487897
RPL9P16	31.8095	2.27665	0.438489	5.19203	2.0801e-07	4.8729e-06
RPP38-DT	3.80065	3.02331	1.03242	2.92837	0.00340744	0.0199795
RPS11P5	1136.96	-1.13395	0.1399	-8.10541	5.25667e-16	5.51221e-14
RPS15AP1	47.0389	1.11391	0.371265	3.00031	0.00269707	0.0165081
RPS15AP10	33.2989	2.42213	0.364894	6.6379	3.18183e-11	1.67136e-09
RPS15AP24	10.5356	1.59084	0.567239	2.80453	0.00503901	0.0269939
RPS15AP29	11.2847	1.97002	0.50237	3.92145	8.80165e-05	0.000987948
RPS20P4	15.2015	1.42643	0.493317	2.89152	0.00383385	0.0218261
RPS24P8	13.5245	1.33704	0.522695	2.55798	0.0105282	0.0477699
RPS27AP7	15.5098	1.88726	0.431469	4.37404	1.21968e-05	0.000180846
RPS29P22	5.54792	2.1424	0.824811	2.59744	0.00939208	0.043803
RPS2P5	1207.61	-1.43535	0.283473	-5.06345	4.11738e-07	9.14842e-06
RPS3AP27	2.31538	3.49283	1.25339	2.78671	0.00532467	0.0281675
RPS3AP38	9.98848	2.2645	0.624025	3.62887	0.000284665	0.00262414
RPS3P6	13.1227	1.86475	0.583459	3.19603	0.00139332	0.00965593
RPS4XP14	20.055	1.08592	0.422704	2.56898	0.0101999	0.0466583
RPS6KA5	717.336	1.16691	0.328197	3.5555	0.000377256	0.00331026
RPS8	6906.91	1.2778	0.116059	11.0099	3.42325e-28	1.56624e-25
RRM2	1048.46	1.37965	0.250251	5.51309	3.52591e-08	9.91812e-07
RRS1	59.0138	2.77606	0.312314	8.88867	6.18423e-19	1.00467e-16
RSL24D1P3	3.39737	4.06587	1.48603	2.73605	0.0062181	0.0318273
RTL1	35.1677	1.54522	0.571304	2.70473	0.00683598	0.0343777
RTL10	211.474	-1.3915	0.171678	-8.1053	5.26167e-16	5.51221e-14
RUNX3	55.6847	-1.91376	0.463786	-4.1264	3.68491e-05	0.000468854
RXFP4	6.26291	-1.95139	0.673008	-2.8995	0.00373759	0.021414
RYR2	461.528	1.31717	0.37248	3.53622	0.000405901	0.00351891
RYR3	296.253	1.80922	0.517634	3.49517	0.000473761	0.00400348
S100A16	342.229	1.2051	0.267192	4.51023	6.4756e-06	0.000104669
S100A6	1033.91	-1.80151	0.401181	-4.49051	7.10533e-06	0.000113334
S100A8	46.4036	-2.89095	0.705715	-4.09648	4.19476e-05	0.000525964
S1PR4	13.2852	-1.70272	0.49049	-3.47147	0.000517618	0.00431875
SAA1	35.8581	-3.82204	1.41061	-2.7095	0.00673856	0.0339487
SALL4	78.0607	-1.47077	0.391599	-3.75581	0.000172781	0.00174093
SAMD11	313.037	-1.29483	0.358096	-3.61587	0.000299346	0.00273362
SAMD15	218.89	1.15748	0.273047	4.23913	2.24386e-05	0.000305249
SAMSN1	103.836	-1.30523	0.251748	-5.18465	2.16425e-07	5.04895e-06
SASH3	60.753	-1.02633	0.264733	-3.87686	0.000105812	0.00115605
SAT1	3981.86	1.30606	0.386651	3.37787	0.000730502	0.00570234
SAXO2	116.043	1.23705	0.422803	2.92582	0.00343545	0.0200728
SCARNA11	66.1247	3.61336	0.615704	5.86866	4.3933e-09	1.53178e-07
SCARNA17	311.174	-1.89845	0.229861	-8.25912	1.4675e-16	1.68717e-14
SCARNA5	11320.4	-2.04855	0.278644	-7.35184	1.95498e-13	1.4561e-11
SCGB1D2	1151.25	4.99451	0.765586	6.52378	6.85584e-11	3.38549e-09
SCGB1D4	193.441	5.20109	1.21456	4.28228	1.8499e-05	0.000259205
SCGB2A1	1165.62	1.63562	0.432996	3.77746	0.000158437	0.00162414
SCN2A	286.753	1.22729	0.437352	2.80618	0.00501332	0.0268884
SCNN1D	83.0189	-1.41083	0.217825	-6.47691	9.36207e-11	4.49842e-09
SDC4	494.022	-1.14222	0.296104	-3.8575	0.000114554	0.00124127
SDHAF3	121.535	1.11977	0.163586	6.84515	7.63937e-12	4.47172e-10
SDHAF4	54.4707	1.27022	0.331714	3.82925	0.000128534	0.00136828
SEC13P1	23.4529	1.34543	0.423269	3.17866	0.0014796	0.0101503
SEC14L1	2499.86	1.46994	0.334193	4.39848	1.09014e-05	0.000164578
SECTM1	46.4989	-1.41887	0.353459	-4.01424	5.96383e-05	0.000711565
SELENOTP1	19.9304	-1.21173	0.454728	-2.66474	0.00770468	0.0377667
SELL	45.8173	-2.2502	0.533422	-4.21843	2.46014e-05	0.000330262
SEMA3E	2153.43	-2.4719	0.907397	-2.72417	0.00644635	0.0327637
SEMA4D	1206.29	-1.01293	0.118889	-8.52002	1.59527e-17	2.03206e-15
SENP3	28.1983	1.08992	0.426053	2.55818	0.0105221	0.0477522
SEPTIN14P12	13.4352	2.28529	0.528554	4.32366	1.5346e-05	0.00022054
SEPTIN7P1	3.69019	3.56505	1.15619	3.08345	0.00204618	0.0132735
SERPINA4	61.1277	2.57836	0.320228	8.05165	8.16841e-16	8.17534e-14
SERPINA5	1267.56	1.69459	0.364615	4.64762	3.35782e-06	5.88117e-05
SERTAD1	15.536	1.50119	0.499335	3.00638	0.00264376	0.0162429
SERTAD3	23.6141	1.38749	0.407383	3.40585	0.000659582	0.00523255
SERTAD4	84.9189	-1.30772	0.318249	-4.10911	3.97195e-05	0.000500827
SETP22	7.08652	-1.61705	0.614495	-2.63151	0.00850053	0.0407295
SGIP1	550.469	-1.83993	0.436326	-4.21686	2.47727e-05	0.000331966
SGK1	1615.85	1.11168	0.397242	2.7985	0.00513401	0.027385
SGK3	2.36223	3.38036	1.26518	2.67185	0.00754354	0.0371526
SGPP1	326.445	-1.14132	0.204023	-5.5941	2.21771e-08	6.54195e-07
SGSM1	70.1225	-1.48099	0.357906	-4.13792	3.50473e-05	0.00045118
SH2D1B	17.3602	-1.62891	0.464221	-3.50891	0.000449954	0.0038414
SH2D2A	22.8968	-1.23976	0.316535	-3.91667	8.97809e-05	0.00100239
SH3BP1	28.8226	1.39573	0.347433	4.01726	5.88797e-05	0.000705121
SHC3	106.347	-1.10864	0.301022	-3.68292	0.000230574	0.00219398
SHISA5	1847.59	-1.10653	0.207707	-5.32738	9.96406e-08	2.50994e-06
SHISA6	525.71	1.35108	0.426933	3.16462	0.00155284	0.0105686
SHROOM3-AS1	16.9034	1.17353	0.446321	2.62933	0.00855521	0.0409041
SIGLEC10	46.7865	-1.27231	0.34433	-3.69504	0.000219851	0.00210814
SIGLEC8	4.09091	-2.26998	0.791364	-2.86844	0.00412497	0.023189
SIRPG	34.7539	-1.22892	0.419693	-2.92815	0.0034099	0.019986
SLA2	83.3485	-1.93149	0.299472	-6.44964	1.12116e-10	5.24743e-09
SLAMF6	37.6715	-1.65441	0.435419	-3.79958	0.000144939	0.00150543
SLAMF7	62.7775	-1.55289	0.364492	-4.26041	2.04048e-05	0.000281511
SLAMF8	33.8652	-1.60731	0.448882	-3.58071	0.000342668	0.0030558
SLC14A1	34.6835	-1.04048	0.407701	-2.55207	0.0107084	0.0483919
SLC15A2	1783.47	2.59853	0.538197	4.82822	1.37761e-06	2.66706e-05
SLC15A3	120.763	-1.59	0.303033	-5.24697	1.54625e-07	3.7476e-06
SLC16A1-AS1	8.41306	1.60472	0.582083	2.75686	0.00583596	0.0302722
SLC1A7	14.1727	-1.75746	0.602902	-2.915	0.00355689	0.0206425
SLC24A2	3.58217	3.58199	1.38449	2.58724	0.0096749	0.0447959
SLC25A1	1095.2	1.22097	0.251812	4.84874	1.24251e-06	2.42647e-05
SLC25A18	10.2315	3.01013	0.832437	3.61604	0.000299142	0.00273287
SLC26A10P	19.568	1.81813	0.489626	3.7133	0.000204576	0.00199752
SLC26A4	576.324	4.43641	1.04036	4.26428	2.00545e-05	0.000277532
SLC28A3	53.1988	3.78337	1.23145	3.07228	0.0021243	0.0136787
SLC2A12	88.7559	-1.85841	0.487115	-3.81513	0.000136111	0.0014286
SLC2A13	448.096	-1.16047	0.260681	-4.45168	8.51993e-06	0.000132553
SLC2A3P2	30.7246	1.34883	0.464991	2.90076	0.00372257	0.0213389
SLC2A5	35.8945	-1.75037	0.583982	-2.9973	0.00272382	0.0166254
SLC2A6	20.4047	-1.70448	0.628167	-2.71341	0.00665948	0.0336259
SLC35G1	27.5755	1.896	0.425735	4.45349	8.44865e-06	0.000131535
SLC39A3	84.0888	-1.47867	0.234195	-6.31385	2.72171e-10	1.17795e-08
SLC3A1	7.37899	2.70306	0.906362	2.98232	0.00286075	0.0173198
SLC45A3	46.3157	-2.36022	0.429926	-5.48983	4.02322e-08	1.11768e-06
SLC46A3	100.666	-1.61419	0.250416	-6.44604	1.14814e-10	5.36252e-09
SLC49A3	80.1598	-1.18932	0.277083	-4.2923	1.7683e-05	0.000249018
SLC52A3	426.741	1.27516	0.333219	3.82679	0.000129824	0.00137679
SLC5A1	122.046	3.68311	0.630998	5.83697	5.31599e-09	1.81399e-07
SLC5A9	129.135	2.17842	0.496558	4.38705	1.14898e-05	0.000171956
SLC6A2	36.5446	-2.49262	0.857149	-2.90804	0.00363701	0.0209831
SLC7A5	502.184	-1.35038	0.434137	-3.1105	0.0018677	0.0123443
SLC8A1	1022.15	-1.62765	0.319091	-5.1009	3.38045e-07	7.66292e-06
SLCO4C1	8.12256	-1.7008	0.516715	-3.29157	0.000996314	0.00734024
SLFN12L	104.607	-1.4611	0.305198	-4.78737	1.68985e-06	3.21056e-05
SMIM18	23.658	2.5173	0.449701	5.59772	2.17185e-08	6.43247e-07
SMIM24	26.894	2.47207	0.775358	3.1883	0.00143112	0.00987512
SMIM3	122.586	-1.35977	0.239345	-5.68123	1.33732e-08	4.18735e-07
SMPDL3A	186.005	-1.15674	0.307955	-3.75619	0.000172521	0.00173988
SMTNL1	34.9115	-1.30658	0.361042	-3.61891	0.000295842	0.00271267
SNAI2	1129.2	1.03729	0.197351	5.25605	1.47183e-07	3.59052e-06
SNAP25	33.4335	1.32053	0.297913	4.4326	9.31041e-06	0.000143359
SNCA	346.015	-1.16043	0.382108	-3.03691	0.00239013	0.0149472
SNHG15	67.0942	-1.39381	0.206854	-6.73813	1.60436e-11	8.81575e-10
SNORA11F	8.31819	4.23721	1.06645	3.97318	7.09191e-05	0.000822366
SNORA11G	8.19384	2.42682	0.776981	3.1234	0.00178777	0.0119158
SNORA13	350.924	4.47853	0.863991	5.18354	2.17717e-07	5.07381e-06
SNORA14B	59.5256	1.46277	0.445354	3.28451	0.00102161	0.0074775
SNORA21	299.564	1.40545	0.548267	2.56344	0.0103641	0.0472165
SNORA24B	5.73948	2.06863	0.804314	2.57191	0.0101138	0.0463447
SNORA27	1047.73	1.33042	0.47292	2.81321	0.00490492	0.0264462
SNORA2A	68.5756	1.74004	0.518603	3.35524	0.00079295	0.00610688
SNORA2B	93.2455	1.155	0.453478	2.54699	0.0108656	0.0489346
SNORA32	103.419	2.83811	0.439355	6.45971	1.04907e-10	4.93064e-09
SNORA41	43.542	2.23009	0.64739	3.44474	0.000571616	0.00467191
SNORA47	39.1163	1.90074	0.512522	3.70859	0.000208417	0.00202185
SNORA48	3106.58	3.69536	0.462069	7.99741	1.27063e-15	1.2494e-13
SNORA49	578.998	-2.88282	0.437157	-6.59447	4.26781e-11	2.2097e-09
SNORA52	363.398	2.90915	0.439069	6.62573	3.45547e-11	1.80159e-09
SNORA57	94.9628	2.07728	0.435727	4.76738	1.8664e-06	3.50442e-05
SNORA58	51.9887	3.17939	0.700443	4.53912	5.64907e-06	9.29857e-05
SNORA58B	45.6089	3.43151	0.63716	5.38563	7.21927e-08	1.8845e-06
SNORA5C	45.3131	-1.68635	0.606928	-2.7785	0.00546098	0.0287394
SNORA6	640.634	1.87755	0.404098	4.64627	3.3799e-06	5.90601e-05
SNORA63	13465.3	2.70477	0.447156	6.04883	1.45898e-09	5.6492e-08
SNORA63C	90.5035	5.79668	1.24212	4.66678	3.05954e-06	5.42657e-05
SNORA64	140.709	1.12694	0.43373	2.59825	0.0093699	0.0437268
SNORA69	12.1437	2.58409	0.763109	3.38627	0.000708496	0.00554601
SNORA74C-1	5.72739	2.18591	0.714546	3.05916	0.00221962	0.0141368
SNORA74C-2	10.1218	1.91369	0.532177	3.59596	0.000323202	0.00291349
SNORD102	7.36871	2.95279	0.9012	3.27651	0.00105099	0.00764052
SNORD113-2	3.39059	3.37475	1.31182	2.57256	0.0100949	0.046291
SNORD113-3	27.2141	1.23224	0.41663	2.95764	0.00310007	0.0185088
SNORD113-9	11.8901	2.20047	0.744181	2.9569	0.00310744	0.018538
SNORD114-3	18.7337	1.70506	0.472491	3.60866	0.000307784	0.00280223
SNORD13D	2.09627	3.9557	1.38697	2.85205	0.00434382	0.0240573
SNORD14B	72.6251	6.18629	0.810732	7.6305	2.33854e-14	1.92749e-12
SNORD17	25090.8	-1.70381	0.22288	-7.6445	2.09762e-14	1.7482e-12
SNORD18C	4.98967	2.61569	0.876546	2.98408	0.00284428	0.0172387
SNORD24	15.2784	2.01514	0.607333	3.31802	0.000906591	0.00682908
SNORD3A	48682.3	1.25399	0.37585	3.33641	0.000848677	0.0064672
SNORD46	107.089	2.56958	0.579439	4.43461	9.22401e-06	0.000142126
SNORD49A	28.3549	1.69681	0.511605	3.31665	0.00091105	0.00684955
SNORD6	14.9302	2.08679	0.603444	3.45814	0.000543919	0.00449821
SNORD66	13.1134	2.00415	0.646522	3.0999	0.00193589	0.0127035
SNORD69	25.9551	1.47758	0.540867	2.73188	0.00629736	0.032123
SNORD70	7.48418	-1.96284	0.654574	-2.99866	0.00271171	0.0165696
SNORD71	12.2749	-1.69558	0.576327	-2.94205	0.00326049	0.0193123
SNORD83A	23.7918	-1.4203	0.402576	-3.52803	0.000418667	0.00360865
SNORD9	59.2057	2.19668	0.299075	7.34492	2.05879e-13	1.51829e-11
SNORD97	2086.04	1.01924	0.371564	2.7431	0.0060862	0.0312879
SNRK	602.78	-1.08199	0.138131	-7.83307	4.76112e-15	4.3911e-13
SNRPD3	393.016	-1.30709	0.21524	-6.0727	1.25777e-09	4.9211e-08
SNRPGP18	2.89398	3.2542	1.24724	2.60912	0.00907756	0.0426645
SNRPGP4	12.0793	2.24057	0.562141	3.98578	6.72588e-05	0.000787403
SNURF	28.8965	-1.78196	0.363586	-4.90107	9.53141e-07	1.93985e-05
SNX12	324.518	1.12648	0.15257	7.38341	1.54291e-13	1.1686e-11
SNX20	11.3909	-1.48613	0.542458	-2.73963	0.0061508	0.0315549
SNX5P2	114.037	-1.18137	0.412529	-2.86372	0.00418703	0.0234379
SOCS3	64.2943	-2.06483	0.715125	-2.88736	0.00388485	0.0220716
SOWAHC	41.484	1.97136	0.318398	6.1915	5.9595e-10	2.46052e-08
SOX7	15.361	1.82843	0.536281	3.40947	0.000650901	0.00518017
SP140	169.275	-1.09408	0.320234	-3.41651	0.000634305	0.00507874
SP3	5294.82	-1.024	0.132422	-7.73286	1.05154e-14	9.20874e-13
SPACDR	12.3499	-1.35582	0.42578	-3.18431	0.00145098	0.00998145
SPAG11A	4.4644	4.52889	1.70053	2.66323	0.0077395	0.0378764
SPAG5-AS1	25.769	-1.8039	0.468705	-3.84868	0.000118756	0.00128123
SPATA2	76.5367	1.13671	0.288031	3.94649	7.93039e-05	0.000905713
SPATA2L	14.4864	-1.80042	0.421339	-4.27309	1.92779e-05	0.000268867
SPATC1	8.49096	-1.34369	0.522887	-2.56975	0.0101771	0.0465785
SPCS2	988.849	1.07185	0.143094	7.49051	6.86066e-14	5.37794e-12
SPDEF	726.552	1.86996	0.380214	4.91817	8.7359e-07	1.7935e-05
SPDYE15	1.86064	-3.88424	1.51763	-2.55942	0.0104847	0.0476497
SPEF1	9.43114	1.68552	0.645184	2.61246	0.00898929	0.0423764
SPICE1	22.6355	-1.45253	0.385463	-3.76828	0.000164374	0.00167505
SPN	57.8489	-1.33699	0.404164	-3.30804	0.000939529	0.00700709
SPOCK1	436.809	-1.10681	0.381993	-2.89747	0.00376189	0.0215202
SPOCK2	84.6699	-1.38357	0.351689	-3.93408	8.35176e-05	0.000946124
SPRING1	160.266	-1.28097	0.203514	-6.29426	3.08867e-10	1.32653e-08
SPTSSA	206.496	1.97374	0.227648	8.67012	4.31652e-18	6.12482e-16
SRA1	298.437	1.31588	0.186462	7.05711	1.69997e-12	1.07965e-10
SRCAP	286.94	-1.18658	0.273077	-4.34523	1.39131e-05	0.000202807
SRGAP2D	14.8746	2.56479	0.909635	2.81959	0.00480856	0.0260835
SRGN	559.076	-1.31058	0.240581	-5.44756	5.10669e-08	1.38563e-06
SRP14	6446.21	1.3776	0.160388	8.58917	8.75987e-18	1.17597e-15
SRP72P2	131.194	1.23229	0.238628	5.16407	2.41639e-07	5.59062e-06
SRRM2	25393.6	1.23143	0.140994	8.73392	2.45992e-18	3.65225e-16
SSBP3-AS1	23.3419	-1.76134	0.335292	-5.25315	1.4952e-07	3.62781e-06
SSTR1	5.17224	2.338	0.837579	2.79138	0.00524842	0.0278434
SSXP10	17.4435	2.68366	0.700973	3.82847	0.000128942	0.00137086
ST8SIA4	94.4472	-1.30887	0.345399	-3.78945	0.000150981	0.00155768
STAP2	554.697	-1.05234	0.150939	-6.97196	3.12564e-12	1.90937e-10
STEAP4	183.57	4.28911	1.11624	3.84246	0.000121809	0.0013085
STRA6	6640.26	-1.25692	0.342363	-3.67129	0.000241327	0.00228476
STX12	748.548	1.03424	0.271542	3.80878	0.000139654	0.00145962
STX16	256.614	-1.12918	0.142164	-7.9428	1.97675e-15	1.87783e-13
STX19	45.1273	1.57919	0.338288	4.66818	3.03881e-06	5.39407e-05
STX1B	82.0896	-1.26199	0.362104	-3.48515	0.000491861	0.00413772
STX8P1	6.40282	2.05772	0.75839	2.71327	0.00666228	0.0336324
SUGT1P2	65.3266	1.12976	0.244802	4.61498	3.93137e-06	6.76938e-05
SUGT1P4-STRA6LP	3.18422	-2.66239	1.01542	-2.62195	0.00874291	0.041527
SULF1	1508.78	-1.27802	0.479765	-2.66384	0.00772542	0.0378323
SULT2B1	79.5338	3.85754	0.730525	5.2805	1.28829e-07	3.19848e-06
SURF4	1577.69	-1.21624	0.156698	-7.7617	8.3801e-15	7.485e-13
SVBP	92.0073	-1.12084	0.18773	-5.97049	2.36549e-09	8.67953e-08
SVIL-AS1	81.1351	1.30861	0.207242	6.31438	2.71245e-10	1.17622e-08
SYBU	259.173	1.8524	0.611626	3.02864	0.00245655	0.0152897
SYT11	306.164	1.00599	0.242763	4.14392	3.41412e-05	0.000440905
SYT2	103.519	1.13762	0.399055	2.85078	0.00436119	0.0241178
SYT5	7.17326	1.96364	0.697479	2.81534	0.00487256	0.0263414
TADA2A	14.7867	2.18347	0.567866	3.84505	0.000120527	0.00129596
TAF3	412.615	-1.01407	0.104536	-9.70071	2.99417e-22	6.64616e-20
TAGAP	66.8698	-1.33113	0.349777	-3.80566	0.000141428	0.00147474
TATDN2P2	18.7612	1.80781	0.496449	3.64148	0.000271077	0.00251647
TBC1D25	251.691	-1.02613	0.135017	-7.60001	2.96104e-14	2.39652e-12
TBCEL	56.7395	1.43257	0.25742	5.56512	2.61974e-08	7.58811e-07
TCEA3	628.668	1.03216	0.211193	4.8873	1.02226e-06	2.05912e-05
TCEANC	35.3303	-1.0067	0.287446	-3.50222	0.000461403	0.00391974
TCF3	1146.37	-0.999497	0.175974	-5.6798	1.34854e-08	4.21072e-07
TCL1A	4.87256	-4.73281	1.73771	-2.72358	0.00645781	0.0327997
TEDC1	65.2256	1.05696	0.209371	5.04829	4.45772e-07	9.83639e-06
TEDDM1	9.97634	2.22727	0.638213	3.48985	0.000483294	0.00407483
TEF	116.004	-1.65084	0.29839	-5.53247	3.15749e-08	8.98322e-07
TEKT4	60.2653	2.30274	0.612403	3.76018	0.000169792	0.00171699
TENM2	178.952	3.99848	1.07097	3.73351	0.000188826	0.00186653
TESPA1	34.4313	-1.88472	0.436819	-4.31466	1.59852e-05	0.000228262
TFCP2L1	557.742	1.05717	0.329157	3.21175	0.00131931	0.00922283
TFEC	50.3798	-1.33574	0.395926	-3.37372	0.000741593	0.00577284
TFPI2	716.201	1.45432	0.410356	3.54404	0.000394048	0.00343742
TGFB1I1	912.376	-1.19799	0.284621	-4.20909	2.56404e-05	0.000341959
TGFB3	1227.11	-1.71014	0.435167	-3.92984	8.50018e-05	0.000958579
TGM2	7173.6	-1.00428	0.303035	-3.31406	0.000919527	0.0068854
TGM7	5.15134	-4.03936	1.25883	-3.20882	0.0013328	0.00929681
THBS1	4746.09	-1.61361	0.374223	-4.31189	1.61867e-05	0.000230846
THRAP3P3	20.802	1.72793	0.463452	3.7284	0.0001927	0.00189729
THTPA	248.69	-1.16144	0.158533	-7.32619	2.36785e-13	1.72915e-11
THUMPD1	707.186	1.20368	0.302318	3.98151	6.8478e-05	0.000798341
THUMPD3-AS1	17.2541	1.19525	0.367345	3.25375	0.00113894	0.00816039
TIFA	50.1022	1.33899	0.255873	5.23302	1.66763e-07	4.01575e-06
TIGD6	49.5881	2.09302	0.270861	7.72728	1.09869e-14	9.54708e-13
TIGIT	17.4708	-1.66103	0.398732	-4.16577	3.10298e-05	0.000403983
TIMM10	195.947	1.18801	0.291854	4.07055	4.69019e-05	0.000581212
TLR1	225.316	-1.02979	0.273391	-3.76671	0.000165412	0.00168333
TM2D3	455.717	-1.0118	0.126217	-8.01633	1.08947e-15	1.08075e-13
TM4SF20	3.80235	3.03776	1.14878	2.64433	0.00818531	0.0395744
TMC8	223.327	-1.1478	0.304695	-3.76705	0.00016519	0.00168184
TMCC1-DT	19.7583	1.70541	0.42064	4.05433	5.02775e-05	0.000614517
TMED10P2	15.3442	1.46701	0.550236	2.66615	0.00767253	0.0376561
TMED2-DT	7.95449	1.9115	0.663962	2.87893	0.00399022	0.0225446
TMEM101	898.113	1.41136	0.285432	4.94465	7.62791e-07	1.59079e-05
TMEM102	16.6203	1.99226	0.508429	3.91846	8.91159e-05	0.000995957
TMEM11	97.3318	2.02582	0.20213	10.0223	1.21595e-23	3.16981e-21
TMEM130	27.8048	-1.51629	0.457463	-3.31456	0.000917867	0.00687561
TMEM139	11.2029	1.77668	0.512733	3.46511	0.000530007	0.00440409
TMEM14EP	117.201	-1.06049	0.211933	-5.00388	5.6188e-07	1.21123e-05
TMEM158	13.1103	2.67017	0.747734	3.57102	0.000355594	0.00314604
TMEM161B-DT	22.3745	1.52598	0.411493	3.7084	0.000208577	0.00202253
TMEM176A	107.345	-1.8125	0.465781	-3.89132	9.96989e-05	0.00109835
TMEM176B	342.893	-0.99521	0.31539	-3.15549	0.00160227	0.0108688
TMEM196	40.826	1.97118	0.714626	2.75835	0.00580948	0.0301868
TMEM200C	20.8703	-2.02835	0.729871	-2.77906	0.00545169	0.0287014
TMEM217	4.09553	2.61097	1.00742	2.59174	0.00954913	0.0443326
TMEM222	164.506	-1.01535	0.137705	-7.37337	1.66362e-13	1.25578e-11
TMEM232	179.415	1.39999	0.380777	3.67666	0.000236303	0.00224003
TMEM236	25.9453	-1.38932	0.338613	-4.10297	4.07887e-05	0.000512292
TMEM238	14.3846	1.32834	0.434971	3.05387	0.00225911	0.0143435
TMEM250	81.6511	-1.10069	0.203312	-5.41378	6.17074e-08	1.63525e-06
TMEM255A	14.529	-1.61395	0.56158	-2.87394	0.00405382	0.0228635
TMEM262	14.8833	-1.83393	0.393386	-4.66191	3.13291e-06	5.53917e-05
TMEM30BP1	11.5083	-1.30599	0.455209	-2.86899	0.00411788	0.0231549
TMEM31	13.9029	1.76106	0.614829	2.8643	0.00417926	0.0234003
TMEM38A	14.8856	-1.28759	0.489898	-2.62828	0.00858185	0.041
TMEM45B	31.0609	-1.67166	0.446695	-3.74228	0.000182361	0.00181301
TMEM47	28.7341	-1.44977	0.390435	-3.71321	0.000204648	0.00199752
TMEM59L	143.771	-1.14399	0.326459	-3.50424	0.000457913	0.00389452
TMEM60	47.1165	-1.50586	0.257587	-5.84603	5.03431e-09	1.72582e-07
TMEM74	8.18456	2.36553	0.856942	2.76043	0.00577248	0.0300402
TMEM81	39.9777	-1.98363	0.295723	-6.70772	1.97694e-11	1.06798e-09
TMEM88	19.4429	1.66829	0.444832	3.75038	0.000176563	0.00177188
TMEM9B	309.186	-1.0594	0.118336	-8.95247	3.47609e-19	5.8157e-17
TMEM9B-AS1	6.62813	3.0155	0.838096	3.59803	0.000320634	0.00289384
TMPRSS13	32.9595	-1.91091	0.456444	-4.18651	2.83273e-05	0.000373351
TMPRSS3	198.687	-1.45476	0.404953	-3.59241	0.000327628	0.00294511
TMPRSS4	450.813	-1.19808	0.46533	-2.57469	0.0100329	0.0460559
TMSB10	6718.24	-1.41816	0.235361	-6.02547	1.68617e-09	6.45088e-08
TMSB15A	67.4119	1.13957	0.225425	5.05523	4.29883e-07	9.53269e-06
TMSB4XP2	5.51919	2.70956	0.920054	2.945	0.00322956	0.0191595
TMSB4XP6	3691.45	1.05062	0.238492	4.40524	1.05669e-05	0.00016061
TNFAIP8L1	24.3778	1.33862	0.374681	3.57269	0.000353339	0.00313475
TNFRSF10C	44.2878	-2.01841	0.536908	-3.75932	0.000170375	0.00172211
TNFRSF12A	35.7267	-1.60743	0.611931	-2.62681	0.00861884	0.0410758
TNFRSF18	10.7599	-1.43761	0.491075	-2.92748	0.00341722	0.0200169
TNFRSF9	12.1683	-2.45417	0.662673	-3.70344	0.000212697	0.00205413
TNIP3	19.155	-1.21957	0.412688	-2.95518	0.00312488	0.018628
TNKS1BP1	2980.93	-1.0755	0.183667	-5.85574	4.74892e-09	1.64299e-07
TOMM22	331.43	1.24732	0.125443	9.94339	2.69497e-23	6.63939e-21
TP53RK	245.982	-1.38752	0.156131	-8.88687	6.28558e-19	1.01379e-16
TPBG	411.048	1.58595	0.238288	6.65561	2.82123e-11	1.49173e-09
TRAC	138.718	-1.41383	0.377672	-3.74353	0.000181456	0.00180679
TRAF3IP3	78.2154	-1.03795	0.318267	-3.26127	0.00110913	0.00799797
TRAT1	12.2447	-1.98226	0.536917	-3.69192	0.000222564	0.00212869
TRAV13-1	4.72848	-2.6911	0.958165	-2.8086	0.00497577	0.0267382
TRBC1	4.17305	-2.04835	0.759154	-2.6982	0.0069716	0.034872
TRDC	122.142	-1.13725	0.269903	-4.21355	2.51383e-05	0.000335861
TREX2	8.13294	-1.3517	0.514828	-2.62554	0.00865108	0.0411868
TRGC2	52.8483	-1.17041	0.316685	-3.69581	0.000219191	0.00210271
TRGJP2	1.82795	-4.9813	1.57255	-3.16766	0.0015367	0.0104798
TRGV3	32.7184	-1.55039	0.463852	-3.34242	0.000830504	0.00634813
TRH	105.217	2.29852	0.635121	3.61902	0.000295716	0.00271262
TRHDE	12.9946	-1.27918	0.445703	-2.87002	0.00410451	0.0230971
TRIL	8.16616	2.00903	0.6589	3.04907	0.00229553	0.0145254
TRIM11	93.904	-1.36153	0.184165	-7.39295	1.43605e-13	1.09135e-11
TRIM13	261.882	2.45722	0.174129	14.1115	3.225e-45	9.03766e-42
TRIM2	111.049	-1.24726	0.225719	-5.52572	3.28137e-08	9.31203e-07
TRIM52	496.509	-1.35766	0.160775	-8.44447	3.05424e-17	3.74169e-15
TRIM59	19.1063	1.73664	0.460816	3.76861	0.000164156	0.00167435
TRIM75	2.27314	4.08133	1.31844	3.09558	0.0019643	0.0128436
TRMT2A	329.043	-1.01171	0.11633	-8.69693	3.40986e-18	4.964e-16
TRMT61A-DT	2.02415	3.30693	1.21265	2.72703	0.00639071	0.0325326
TRPC4	108.838	-1.9518	0.348499	-5.60061	2.13605e-08	6.36809e-07
TRPC6P8	5.68379	5.48325	1.40927	3.89085	9.98917e-05	0.00109994
TRPM2	108.902	-1.22396	0.207401	-5.90142	3.60379e-09	1.28248e-07
TSPAN7	18.2934	-2.19472	0.625848	-3.5068	0.000453529	0.00386456
TSPAN8	38.8155	-2.09506	0.673149	-3.11233	0.00185619	0.01229
TSTD1	67.6487	-1.76701	0.202349	-8.73248	2.49154e-18	3.67486e-16
TSTD3	16.4472	1.95616	0.496923	3.93655	8.2661e-05	0.000940028
TTC41P	21.1636	-1.09299	0.375779	-2.90859	0.00363068	0.0209668
TTI1	688.173	1.44093	0.110174	13.0787	4.35914e-39	5.74868e-36
TTLL10-AS1	157.161	1.89541	0.59018	3.21158	0.00132009	0.00922541
TTLL7	273.666	1.14051	0.268544	4.24701	2.16642e-05	0.000296333
TTN-AS1	24.1524	-1.06317	0.414392	-2.56561	0.0102994	0.0469697
TTR	4.0343	2.69008	1.01063	2.66178	0.00777297	0.038007
TUBB4BP8	6.33867	1.83094	0.7051	2.59671	0.00941226	0.0438789
TUBB8P2	3.29404	3.4318	1.3496	2.54283	0.0109959	0.0494024
TUBBP10	27.7338	1.22446	0.301032	4.06755	4.75107e-05	0.000586856
TULP2	16.762	-2.10458	0.590864	-3.56187	0.000368218	0.00324365
TYMS	312.292	1.09067	0.260378	4.18881	2.80417e-05	0.000370458
U4	7.82056	-3.42262	0.674031	-5.07783	3.81765e-07	8.54171e-06
UAP1L1	247.959	1.46499	0.220721	6.63726	3.19558e-11	1.67387e-09
UBALD1	39.656	1.77797	0.326664	5.44283	5.2441e-08	1.41648e-06
UBASH3A	49.9985	-1.36182	0.476145	-2.86011	0.004235	0.0236298
UBB	4666.92	1.41936	0.11101	12.7859	1.96595e-37	2.20374e-34
UBC	29855.1	1.63047	0.160323	10.1699	2.70213e-24	7.66823e-22
UBE2D4	76.1819	1.01508	0.219536	4.62375	3.76869e-06	6.51931e-05
UBE2L3	424.824	1.17809	0.181443	6.49289	8.42069e-11	4.10399e-09
UBQLN1-AS1	17.9372	1.41749	0.459461	3.08512	0.00203467	0.0132103
UBQLNL	64.9269	-1.36863	0.244436	-5.59912	2.15447e-08	6.41448e-07
UFSP1	10.5696	-1.78396	0.569237	-3.13396	0.00172466	0.0115487
UGT2B26P	6.27009	4.37806	1.62944	2.68685	0.00721286	0.0358548
ULK3	576.164	-1.0411	0.236405	-4.40388	1.06332e-05	0.000161399
UNC13C	48.8742	-1.75752	0.680145	-2.58403	0.00976535	0.0451029
UNC5B	644.896	1.1113	0.266639	4.1678	3.0755e-05	0.000401337
UNC93A	11.7037	-1.98618	0.766335	-2.59179	0.00954782	0.0443326
USP12P1	27.2571	1.45637	0.536858	2.71276	0.00667248	0.0336601
USP12P2	2.62535	3.02941	1.15966	2.61234	0.00899257	0.0423806
USP17L14P	40.7191	-1.27606	0.500251	-2.55084	0.0107462	0.0485432
USP27X	163.408	-1.46967	0.302708	-4.85508	1.2034e-06	2.36865e-05
USP30	431.773	1.01389	0.159812	6.34425	2.23516e-10	9.90316e-09
USP51	155.023	-1.34809	0.153031	-8.80923	1.26011e-18	1.98946e-16
USP53	1714.35	1.11532	0.206667	5.39667	6.78891e-08	1.78012e-06
USP6	325.501	-2.93678	0.994828	-2.95204	0.00315679	0.0187874
VAV3	207.984	-1.02264	0.239007	-4.27871	1.87978e-05	0.000262735
VCAM1	70.5842	-1.44122	0.505938	-2.84862	0.00439093	0.0242524
VDAC1P13	2.0354	4.05282	1.33086	3.04526	0.00232477	0.0146638
VEZTP1	21.2872	1.13463	0.365313	3.10591	0.00189692	0.0124969
VGLL3	266.785	-1.42866	0.358151	-3.989	6.63528e-05	0.000779719
VIT	5.37459	3.18487	1.07451	2.96404	0.00303633	0.0181815
VN1R1	7.48676	1.64041	0.615996	2.66301	0.00774444	0.0378923
VNN1	305.984	3.61514	1.07823	3.35285	0.00079984	0.0061515
WAC-AS1	7.51275	1.75404	0.668608	2.62342	0.00870529	0.0413921
WARS2-AS1	20.4926	1.14441	0.331025	3.45718	0.000545864	0.00450745
WASH4P	56.7556	-1.12373	0.273737	-4.10514	4.04066e-05	0.000508062
WDFY4	459.532	-1.96894	0.327347	-6.01486	1.80045e-09	6.84142e-08
WDR45	270.467	-1.09443	0.169562	-6.45448	1.08594e-10	5.09323e-09
WDR5B	107.602	2.03033	0.192667	10.538	5.76831e-26	1.95939e-23
WDR82P1	55.9318	1.85505	0.228021	8.13543	4.10463e-16	4.38199e-14
WDR82P2	45.2911	1.28695	0.317414	4.05449	5.0243e-05	0.00061451
WDR87BP	33.1836	-1.02763	0.291152	-3.52954	0.000416278	0.00359434
WFDC8	31.1782	1.83788	0.63418	2.89805	0.00375495	0.0215025
WFIKKN1	7.13558	2.00788	0.75217	2.66945	0.00759756	0.0373776
WNK4	257.101	1.04235	0.292153	3.56782	0.000359966	0.00317845
WNT9A	53.9916	-1.0517	0.262169	-4.01152	6.0328e-05	0.000719029
WSCD1	21.0614	-1.02495	0.38093	-2.69066	0.00713118	0.0355118
XCL2	40.5368	-1.6667	0.506809	-3.28861	0.00100683	0.00739582
XCR1	18.9103	-2.01211	0.610008	-3.29849	0.000972053	0.00720412
XIAPP3	5.56539	2.15293	0.766167	2.81	0.00495416	0.0266668
XIRP1	8.14521	-1.81683	0.668693	-2.71698	0.00658799	0.0333273
XKR8	31.5749	2.38979	0.352378	6.78191	1.18595e-11	6.63037e-10
XPNPEP2	28.4184	-1.20104	0.413951	-2.90139	0.00371506	0.0213067
YAE1	316.232	1.27386	0.154454	8.2475	1.61747e-16	1.83141e-14
YBX1P2	41.4995	1.08667	0.282553	3.8459	0.000120109	0.00129272
YBX1P3	2.99826	3.92755	1.1565	3.39606	0.000683633	0.00538523
YBX1P6	8.38954	3.88296	1.07316	3.61825	0.000296598	0.00271849
YBX3P1	41.5432	1.138	0.35145	3.23801	0.00120365	0.00853944
YPEL5	407.896	1.40822	0.164377	8.56705	1.06167e-17	1.3919e-15
YPEL5P2	6.49428	1.90972	0.726796	2.62759	0.00859924	0.0410533
YRDC	97.0228	-1.7023	0.268352	-6.34353	2.24553e-10	9.92951e-09
YTHDC1	35.3219	-3.56885	1.32232	-2.69893	0.0069563	0.034811
YWHAE	5.77214	2.56825	0.882874	2.90897	0.00362627	0.0209475
YWHAG	1826.31	-1.34401	0.146994	-9.14329	6.05801e-20	1.08652e-17
YY2	102.565	-1.04121	0.179338	-5.80588	6.40284e-09	2.13609e-07
ZAP70	189.642	-1.39213	0.258917	-5.37674	7.58482e-08	1.95903e-06
ZBED3	17.9157	1.32224	0.423479	3.12234	0.00179422	0.0119503
ZBP1	32.1428	-2.4196	0.434347	-5.57066	2.53774e-08	7.36965e-07
ZBTB11	726.641	1.06016	0.162546	6.52219	6.92887e-11	3.41403e-09
ZBTB14	154.463	2.06648	0.233132	8.864	7.71966e-19	1.23619e-16
ZBTB16	327.424	2.44212	0.887016	2.75318	0.00590192	0.0304944
ZBTB18	137.113	2.30377	0.182327	12.6353	1.34806e-36	1.31401e-33
ZBTB20-AS1	6.60963	2.03814	0.763662	2.6689	0.00760993	0.0374138
ZBTB25	112.435	1.34601	0.168171	8.00384	1.20603e-15	1.1911e-13
ZBTB39	345.251	-1.743	0.219168	-7.95283	1.82302e-15	1.76927e-13
ZBTB43	133.253	1.86194	0.196549	9.47315	2.71521e-21	5.58462e-19
ZBTB45	192.477	-1.28861	0.150061	-8.58727	8.90633e-18	1.18852e-15
ZBTB47	156.295	1.19707	0.184403	6.4916	8.49289e-11	4.1302e-09
ZBTB7C	46.053	1.60496	0.420658	3.81535	0.000135989	0.00142798
ZBTB8A	13.0592	1.89813	0.596206	3.18368	0.00145417	0.0100003
ZBTB8OSP2	3.89505	4.33098	1.53468	2.82207	0.00477143	0.025926
ZC2HC1C	77.6902	1.16064	0.336744	3.44666	0.000567559	0.00464383
ZC3H12C	220.979	1.60163	0.14628	10.9491	6.71406e-28	2.84005e-25
ZC3H12D	9.19639	-1.43503	0.46798	-3.06644	0.00216623	0.0138876
ZCCHC10	236.419	1.06061	0.156073	6.79561	1.07858e-11	6.07558e-10
ZDHHC24	96.8469	-1.03575	0.157025	-6.59605	4.22268e-11	2.19139e-09
ZFP14	427.227	1.52672	0.138231	11.0448	2.32408e-28	1.10859e-25
ZFP3	229.483	2.30539	0.225246	10.235	1.38244e-24	4.07801e-22
[truncated: 172 more rows]

## Sheet: Prolif vs LH2.3
GeneID	Base mean	log2(FC)	P-value	P-adj
ABCA12	180.011	2.16937	0.000973748	0.0304238
ABCA13	182.581	-1.85336	0.0019248	0.0474948
ABCG1	605.27	1.82519	0.000151801	0.0081745
ACOT1	73.7479	1.27052	3.77566e-05	0.00331935
ACP3	399.864	2.89124	5.34159e-06	0.000752301
ACSM1	60.9622	1.46889	0.000238681	0.0113764
ACSM3	546.328	2.02323	0.000101603	0.00643683
ACTBP15	12.8325	-1.68992	0.000258059	0.0119013
ACVRL1	671.908	1.16662	6.11657e-09	5.16627e-06
ADAMTS20	65.1101	3.06468	1.77221e-06	0.000341552
ADAMTS8	624.061	4.58436	1.00487e-07	3.83296e-05
ADGRF1	8.49517	-3.19096	1.52468e-05	0.00167158
AFMID	339.287	1.36636	8.91811e-05	0.00597365
ALDH1A3	245.974	2.69839	3.35044e-06	0.000542861
ALDH1L1	239.595	1.78024	0.00181909	0.0457497
ALDH3B2	222.999	1.91068	0.000460719	0.0180024
ALOX12B	107.561	4.75276	1.61333e-11	3.28206e-08
ANKFN1	395.675	1.89215	2.06838e-07	6.31166e-05
ANKRD20A7P	25.598	2.28681	4.0318e-07	0.000105455
ANKRD35	992.595	3.02164	1.3478e-07	4.6575e-05
ARL4A	13.7588	1.44971	0.00084272	0.0274469
ARL4D	227.846	1.31485	1.46789e-06	0.000292127
ASPN	242.613	-1.49855	6.97752e-05	0.00511006
ASTN1	100.973	-1.26723	0.00160074	0.0422305
ATP2B2	178.453	1.83098	0.00095703	0.030107
ATP6V1C2	565.674	2.21819	7.88266e-07	0.000173884
AZGP1	15.8323	2.63539	1.57847e-05	0.00171007
B2M	20.5675	-1.50513	2.88651e-06	0.000484254
B4GALT1	2661.32	-1.45361	0.00105614	0.0318564
BAG5	802.711	1.39906	3.92254e-07	0.000104084
BAIAP2L2	165.647	3.70809	2.62068e-11	3.9985e-08
BEX1	50.4243	-2.27483	5.00528e-06	0.000737962
BMAL2	98.5874	-1.43106	1.37277e-07	4.6575e-05
BMP3	6.5961	-3.7135	0.000239222	0.0113764
BNIP3	412.026	1.05072	0.00109457	0.0327994
BRAFP1	17.2944	-1.31393	0.00157879	0.0419138
BVES	99.0978	2.23043	0.000135823	0.0077712
C10orf71	7.88899	3.62468	0.000104613	0.00655944
C16orf86	38.3417	1.00338	0.000782772	0.0263937
C9orf152	296.122	2.61903	8.13358e-08	3.30928e-05
CA4	94.9889	2.7421	4.06845e-09	3.72447e-06
CALB2	307.656	4.86889	3.95537e-05	0.0034089
CAMSAP3	182.695	1.07177	3.11352e-07	8.63719e-05
CAPN12	33.5548	1.50186	0.000437645	0.0173438
CAPN13	20.9019	-2.37404	0.0007726	0.0261559
CAPN6	582.415	2.49022	9.06657e-05	0.00598335
CAPN8	6.56586	3.32599	0.000334346	0.0142361
CARMN	25.7577	-1.31357	1.33744e-05	0.00150228
CCDC102B	98.8919	1.64058	7.98217e-06	0.001022
CCDC184	5.58596	-1.70059	0.00120021	0.034825
CCDC198	48.0802	-2.76033	0.00109019	0.0327755
CCN3	236.506	2.39593	5.43907e-06	0.000760183
CCR1	44.3254	-0.998356	0.000205478	0.0100056
CCR4	7.40097	-1.91931	0.00167266	0.0434393
CD19	19.1332	-1.78862	0.000153097	0.00822008
CD36	733.677	2.30955	0.000401084	0.0163445
CD79A	13.026	-2.4582	0.0010363	0.0316787
CD80	12.0897	-1.70677	0.000979254	0.0304918
CD96	232.729	-1.16723	6.52592e-05	0.00489685
CDC42SE2	230.673	1.00249	0.000255887	0.0118609
CDH23	188.177	1.01984	0.000116621	0.00702934
CDH3	181.573	-2.8008	3.38399e-06	0.000543486
CDH6	139.324	-2.01632	0.000245831	0.0115304
CDKN2C	150.177	1.02814	0.000409298	0.0165427
CDYL2	348.432	1.3289	8.61213e-09	6.85563e-06
CEACAM1	1017.71	1.4265	0.00110297	0.0329566
CEROX1	272.031	1.12435	0.000186785	0.00943248
CES4A	93.0135	1.48639	8.51351e-05	0.00579457
CFI	636.668	-1.21817	0.00021158	0.0102482
CFTR	496.924	-3.34931	1.79436e-08	1.21678e-05
CHL1	98.7335	-2.92517	1.65015e-06	0.000324866
CHMP5P1	4.38984	-2.25888	0.000147745	0.00811069
CHODL	21.4076	2.27044	0.000932499	0.0294873
CHST1	8.31113	-1.30493	0.000894011	0.0286162
CILP	419.8	1.83056	0.00103664	0.0316787
CITED2	367.663	1.39137	4.58833e-06	0.000688588
CITED4	12.4633	2.39243	0.000479172	0.0184698
CKB	3613.13	2.66012	2.80095e-07	8.14009e-05
CLCNKB	9.05163	-1.67202	0.0013801	0.0386956
CNN1	79.7853	-1.6993	6.28143e-05	0.00479195
CNTN1	1763.08	-1.50429	0.000246238	0.0115304
CNTN4	536.435	-1.46379	9.45184e-08	3.682e-05
COA8	182.638	1.28787	5.26688e-05	0.00419267
COL15A1	4051.25	-1.17244	0.000633046	0.0226819
CORIN	96.8129	3.31296	6.4226e-15	4.25506e-11
CP	1187.74	-2.13795	9.62505e-06	0.00118591
CPA6	9.41778	-3.90143	1.21385e-05	0.00138902
CPEB2	179.265	1.24672	0.000100564	0.00641542
CPNE4	9.75184	3.15079	0.00188451	0.0468162
CREB3L1	1713.46	1.62765	0.000288233	0.0127779
CREB3L4	313.071	1.0807	2.88892e-05	0.00274059
CSMD3	80.7372	-2.46252	0.00165078	0.0429931
CSRP2	273.574	1.56852	0.000382086	0.0158631
CTAGE11P	8.45513	-1.54398	0.000284438	0.0126402
CTAGE14P	131.719	-2.3755	1.89003e-06	0.000349541
CTAGE9	238.914	2.53353	5.11446e-05	0.00408911
CTNNBIP1	109.72	1.02712	4.83325e-05	0.00395053
CTSW	177.803	-1.07565	0.000738765	0.0254728
CXCL12	969.199	-1.22522	0.000627164	0.022565
CXCL16	55.9867	-1.30172	0.000740381	0.0254805
CYP24A1	56.0956	-2.85611	0.000108115	0.00671245
CYP26A1	25.2361	4.24467	0.000137552	0.00780057
CYP2J2	290.514	1.71726	0.000397641	0.0162872
CYP2S1	37.7101	-1.52409	2.4308e-05	0.00236985
CYP4B1	28.0432	2.16889	0.00172119	0.0444474
DAB2	3473.32	0.995252	0.00014123	0.00795624
DCAF12L2	10.8137	2.06514	0.000186798	0.00943248
DCDC2C	18.2325	3.18691	0.000684694	0.0240155
DCHS2	154.182	-1.87066	0.000311054	0.0135701
DCST2	49.1591	1.43507	0.000714077	0.0248481
DCT	11.5805	3.60019	0.000838318	0.0274085
DCXR	772.832	0.995495	0.001138	0.0336949
DDIT4	171.524	1.52686	6.51032e-05	0.00489685
DENND2C	296.444	1.48593	0.000149168	0.00815165
DIPK1C	5.96985	4.02478	0.00119223	0.0346483
DKK1	90.4793	3.90815	2.34092e-11	3.9985e-08
DMRTA1	57.6444	2.56251	1.96841e-07	6.21372e-05
DOCK8	952.063	-1.00017	0.00027752	0.012546
DPP4	219.315	-1.15658	0.000366671	0.0153274
DRGX	36.1484	5.17632	8.9176e-07	0.00019217
ECI2	829.256	1.48315	9.63869e-06	0.00118591
EEF1A1P6	62.6549	1.2309	0.00144222	0.0397113
ELP3	3853.82	1.17327	0.000860198	0.0278257
EMILIN3	224.991	1.45893	5.14647e-06	0.000741943
ENDOG	10.0258	2.64381	0.00146848	0.0399499
ENPP3	1868.32	2.68755	1.87987e-06	0.000349541
ENSG00000176984	7.18688	-1.58321	0.00116469	0.0342284
ENSG00000205018	60.0177	-1.04129	0.000873632	0.028062
ENSG00000213514	24.1572	1.4577	1.36441e-05	0.001514
ENSG00000214999	10.2471	4.84568	5.3113e-06	0.000752301
ENSG00000220695	13.5804	-1.17653	0.000903746	0.028827
ENSG00000236478	12.9953	-1.32202	0.00205795	0.0499721
ENSG00000258930	11.3538	-1.23255	0.00130643	0.0374327
ENSG00000259275	8.55402	-1.2378	0.00172935	0.044466
ENSG00000263427	8.1346	6.15162	3.96578e-05	0.0034089
ENSG00000289474	11.3361	20.6812	1.59861e-11	3.28206e-08
ENSG00000290958	83.3246	-1.17292	0.00190075	0.0471555
ENSG00000290998	6.27261	-4.83549	0.000151322	0.00817274
ENTPD2	101.917	1.52537	0.000487085	0.0185406
ENTREP1	578.552	1.27575	0.00183848	0.0459846
EPHA2	660.781	-1.51157	0.00125005	0.0359862
EPHB2	308.091	-1.81868	5.59818e-12	1.70829e-08
EPYC	9.72218	-2.79549	2.1168e-05	0.00215715
ERMN	57.0361	2.04483	0.001829	0.0458727
F10	732.493	1.06325	0.000950876	0.0299649
F5	84.278	-1.69613	0.000446019	0.0176375
FAIM2	28.0581	-1.09426	0.000645343	0.0230323
FAM133FP	19.951	-0.996987	0.001321	0.0374839
FAM20A	1065.26	-1.63395	1.1123e-11	2.90931e-08
FAM234B	297.875	1.43694	0.000385308	0.0159607
FAM83E	93.6623	1.61201	0.000454083	0.0178275
FAT2	218.828	-1.96433	3.11274e-05	0.00286388
FBN2	3191.84	-1.13088	0.00131933	0.0374839
FBXL8	49.9612	1.03355	2.55802e-05	0.00247803
FBXO21	1321.07	1.02677	2.0776e-05	0.00214909
FGFR2	3302.25	-1.43525	0.00181543	0.0457204
FGL1	156.637	2.78216	1.2327e-08	9.0278e-06
FREM1	5175.82	-1.1872	0.000279846	0.0125486
FTH1	2267.04	1.24179	9.65104e-06	0.00118591
FUT8	714.091	-1.01168	0.000126275	0.00731638
GABRA3	132.656	1.1898	0.000138041	0.00780057
GALNT14	12.1237	-2.11445	0.000121309	0.00720762
GCM2	33.0503	1.41394	5.84515e-06	0.000804653
GDPD1	42.3147	-1.14026	0.00015407	0.00822876
GGTA1	144.861	1.54425	5.13593e-06	0.000741943
GJB1	439.366	2.23472	7.33596e-06	0.000952582
GLRXP2	6.89592	5.29401	0.000658542	0.0232765
GNG11	79.8565	1.86144	1.79779e-06	0.000342872
GOLGA8J	11.8693	-4.59493	0.000184646	0.0093908
GOLGA8O	64.9928	-1.95622	0.000364268	0.0152684
GOLGA8T	17.8272	-4.34386	7.68051e-05	0.00542944
GP2	114.916	5.69772	4.18037e-08	1.96252e-05
GPAT3	86.3247	-1.63388	1.00792e-05	0.00120615
GPX3	70.3548	-1.87195	4.88057e-08	2.17947e-05
GREB1L	438.634	1.21448	2.27665e-05	0.00227777
GRHL1	151.716	1.54075	0.00178833	0.0454127
GRIK2	138.225	-1.08628	3.53783e-07	9.66779e-05
GRIN1	61.1228	3.77482	4.0235e-06	0.000624291
GRM7	71.005	-1.42689	1.69766e-06	0.000330664
HERPUD1	2416.72	1.20478	0.000651408	0.0231136
HEXIM1	676.359	1.00381	5.03825e-06	0.000737962
HEY1	139.852	1.78237	1.13609e-10	1.38671e-07
HGD	2045.61	2.14885	0.000603196	0.0220437
HGF	721.234	-1.17965	0.000595972	0.0218233
HHIPL2	9.09876	2.02959	0.00104182	0.0316787
HIF3A	30.6914	2.02154	0.000147958	0.00811069
HK2	1335.98	1.08841	9.085e-05	0.00598335
HMCN1	2689.33	-1.54388	0.00104432	0.0316787
HMGA1	1100.74	-0.998044	0.000400517	0.0163445
HMGCS2	3.94033	4.53367	0.00103723	0.0316787
HMGN2P15	104.075	1.9348	0.000454719	0.0178275
HNRNPA1P40	48.2335	-1.69379	5.41574e-08	2.36087e-05
HOMER2	1040.33	1.18181	2.42472e-08	1.39757e-05
HOOK1	819.522	1.26009	0.00149253	0.0403644
HPSE2	1251.86	1.18659	6.26281e-06	0.000849377
HSD17B2	255.291	6.30091	2.41384e-11	3.9985e-08
HSD17B2-AS1	15.7574	5.37116	2.75736e-05	0.00264317
IDH1	4658.98	2.04644	0.000543603	0.0201883
IFI44L	216.419	-2.33861	1.63251e-07	5.24379e-05
IFIT1	140.225	-1.16749	0.00113094	0.0335597
IFNA2	4.46772	-2.76539	0.00151894	0.0408375
IGF2	58.8934	-1.99176	1.01506e-10	1.32748e-07
IGFBP3	977.149	-1.57417	0.000417758	0.0168138
IGKC	312.979	-2.14605	0.00193882	0.0477763
IGKV1-17	11.0863	-6.42731	1.4356e-06	0.00028884
IGKV1-5	49.1767	-2.88367	0.00153405	0.0411229
IGLV2-8	10.1744	-2.83976	0.00203763	0.0496765
IL13RA2	10.8677	2.37412	9.35205e-05	0.00609347
IL20RA	569.932	2.58205	5.20693e-06	0.000744795
INSYN1	43.9443	2.07903	5.85452e-07	0.000139208
IRS2	447.284	1.54236	5.69656e-07	0.000138461
ITGA10	122.057	1.39297	0.000277235	0.012546
ITGAX	713.983	-1.26195	1.39765e-07	4.6575e-05
ITGB3	53.6453	-1.94319	2.70918e-06	0.000472404
ITGB8	2946.26	1.7296	0.00134035	0.0379297
ITGBL1	90.1167	2.12864	1.15893e-05	0.00136018
JAZF1	628.632	1.76337	0.000169474	0.00889085
KCNB1	47.6417	2.27256	2.40484e-05	0.00236722
KCND2	98.6585	-2.31448	8.05242e-08	3.30928e-05
KCND3	253.625	-1.71021	6.59536e-06	0.000870927
KCNG1	127.485	2.97736	6.98505e-10	7.99308e-07
KCNK13	62.6496	5.69228	1.95014e-09	2.1003e-06
KCNK3	4.93513	-2.94222	0.000235304	0.011278
KCNK5	40.7609	-1.24666	0.00139892	0.0391036
KHDRBS2	108.051	-1.67038	0.000802676	0.0265888
KIF13B	3520.98	1.14296	0.000162493	0.00862343
KIF21A	2604.8	-1.01597	7.96868e-06	0.001022
KLF15	55.279	1.64927	0.000110134	0.00677685
KLHL23	232.574	-0.995959	0.00173011	0.044466
KLK6	35.7234	-1.65939	1.35938e-06	0.000276543
KLRC3	34.0546	-1.484	5.0501e-05	0.00405536
KRT7	332.24	-1.99556	0.0011869	0.0345485
LAMB3	305.767	-2.5459	0.000387737	0.0159889
LAMP3	56.7248	-1.83371	0.000268678	0.0122369
LBH	229.546	-1.30521	0.000278697	0.0125486
LCN2	127.496	-2.97568	1.32064e-07	4.6575e-05
LGALS9	1019.23	-1.11324	4.02327e-05	0.00341907
LHFPL3	33.5057	3.59464	4.96134e-05	0.0040056
LINC03026	16.4242	2.70962	0.000724299	0.0251159
LIPH	13.936	-1.42954	0.00169842	0.0440367
LIX1	15.638	-2.85313	0.000461146	0.0180024
LPA	39.0759	-1.8759	0.000337182	0.0142904
LRP2	246.177	4.99562	3.24856e-08	1.69937e-05
LRP4	4087.43	2.53469	2.78566e-05	0.00265639
LRRC26	14.1782	6.35321	3.45245e-06	0.00054966
LRRC31	41.6021	2.77702	0.000508171	0.0191837
LRRC37A6P	53.1252	-1.19544	0.000614554	0.0222809
LSM14A	19.6629	-2.82523	6.8559e-05	0.00507442
LUM	7954.94	-1.22635	0.000490768	0.0186035
LVRN	7.69493	1.71514	0.00140394	0.039184
LYVE1	34.9697	1.48781	0.00117624	0.0344573
LYZ	840.961	-1.28566	0.00158239	0.0419257
MAPK6P5	14.2549	4.18511	2.12489e-05	0.00215715
MARCHF3	21.6657	-1.07105	0.000928658	0.0294635
MASP1	1811.55	1.74408	0.000135209	0.00776034
MATN2	1709.58	1.32553	5.72336e-05	0.00444195
MCOLN2	155.931	1.2825	0.000144573	0.00809474
MEDAG	49.3221	3.4106	9.82909e-05	0.00629234
MET	1695.38	-1.58402	0.00017352	0.00905121
MFAP4	153.196	-1.8242	2.17092e-08	1.36653e-05
MGLL	1222.99	1.04635	3.02898e-09	2.91882e-06
MIR1915HG	20.9394	1.39509	0.000110301	0.00677685
MIR654	7.02655	2.01926	0.00115454	0.0340324
MISP3	20.0133	1.19095	0.00154472	0.0413483
MMP1	7.40056	-4.5137	0.0020408	0.0496876
MMP26	934.551	2.00026	0.000202518	0.00991418
MMP7	4593.3	-3.66793	5.91996e-06	0.000808869
MT1E	179.514	-1.71196	0.00032842	0.0141151
MTATP6P1	48.2225	-1.34033	1.44568e-05	0.00159451
MTCL1	738.339	1.85134	0.000177399	0.00915731
MTMR8	155.402	-1.05032	0.000661508	0.0233137
MTUS2	350.204	-1.5662	0.000666703	0.0234293
MUC4	192.782	-4.32892	0.000230675	0.0111143
MX1	417.255	-1.45578	7.20361e-05	0.00525462
MXRA7P1	115.579	1.13105	0.000561035	0.0207515
MYO16	54.5497	1.02301	0.00137346	0.0386028
MYO18B	49.6645	5.50245	2.51897e-08	1.39757e-05
MYO3B	127.463	-1.41826	3.34493e-06	0.000542861
NAGS	303.333	1.8699	2.13253e-05	0.00215715
NALF2	91.5197	2.65365	6.34065e-06	0.00085361
NAPSA	14.6233	-1.13859	0.000868228	0.0279374
NAV3	463.26	-2.26387	4.12677e-14	1.88893e-10
NDP	76.9802	1.26275	0.00161752	0.0425504
NDRG2	1618.02	1.02291	6.17285e-05	0.00472882
NMU	29.7671	-1.18356	0.000538841	0.020134
NOG	29.2413	1.7533	0.000493076	0.0186523
NOSTRIN	100.237	1.94668	1.72327e-05	0.00184511
NPIPA3	41.6492	4.90979	9.64652e-07	0.000203009
NPR3	246.142	3.20743	5.58638e-07	0.000138218
NPY1R	35.7275	-2.65289	0.000693269	0.0242234
NRCAM	1187.31	-1.3613	0.000574248	0.0211547
NRIP3	21.9292	-1.38015	0.00104497	0.0316787
NRP2	673.388	-1.98028	3.77542e-05	0.00331935
NUAK2	55.3119	-1.16818	0.00101814	0.0313924
NUDT16	255.957	1.01217	0.000607961	0.0221596
OLFM4	474.298	3.9269	0.000482457	0.0184797
OLR1	8.09267	-2.27548	0.00102571	0.0315095
OPRK1	57.0579	4.72023	0.000197664	0.00980766
OR1J1	15.5785	2.1464	0.000424546	0.0169809
OR1J4	20.2645	3.41921	3.56171e-08	1.81143e-05
OR1N1	14.7774	2.77736	0.00109212	0.0327796
OR1N2	13.7841	2.50549	1.80362e-05	0.00191991
OR1Q1	13.6954	2.65297	5.59075e-05	0.00439318
OR7C1	9.28841	2.82285	0.00145282	0.0397474
PAEP	722.177	-3.89539	6.76879e-13	2.47859e-09
PAK5	68.8179	2.57276	6.16004e-07	0.00014098
PAPSS1	4203.68	1.51806	2.22909e-05	0.00224244
PARM1	1289.07	1.45522	0.000657185	0.0232735
PCDH15	21.7196	2.31385	0.000832683	0.0273218
PCDHB7	225.69	-1.19994	3.1296e-05	0.00286499
PCDHB8	180.666	-1.04321	0.000115744	0.00701706
PCDHGA2	177.767	-1.13593	6.06566e-07	0.000140674
PCDHGA4	131.546	-1.09811	1.31977e-05	0.00149158
PCDHGA7	86.8972	-1.26044	1.18e-06	0.000245508
PCDHGB1	49.0542	-1.00708	5.31139e-05	0.00420979
PCSK6	613.565	3.14746	1.83476e-06	0.000346316
PDE6A	36.8471	2.00671	0.00083582	0.0273757
PDK4	121.298	1.36349	0.000375231	0.0156139
PDZD2	1159.54	1.40129	6.87342e-05	0.00507442
PEBP4	52.7144	3.98454	0.000244203	0.0114939
PER1	279.264	1.0813	0.000489851	0.0186035
PGK2	12.489	4.66476	5.64433e-05	0.00441633
PHACTR3	23.5316	3.11445	4.07099e-05	0.00341907
PHYHIP	29.696	-1.45543	0.000865008	0.0278828
PITPNM3	498.115	1.33086	0.000512601	0.0192715
PKD1L2	2552.17	1.66118	0.000930137	0.0294635
PKHD1L1	14968.3	3.39895	1.39911e-07	4.6575e-05
PLA2G4E	14.2438	4.17002	0.000189667	0.00954016
PLA2G4F	402.679	6.97244	1.03416e-07	3.86418e-05
PLAT	988.916	-1.03792	4.74798e-07	0.000122438
PLAU	154.436	-1.34716	6.61199e-06	0.000870927
PLCE1	1826.34	-1.15457	1.4636e-07	4.7852e-05
PLCL1	850.35	2.39668	1.6311e-05	0.0017567
PLEK2	51.0583	-1.3211	0.00017738	0.00915731
PLPPR4	346.492	1.09712	5.74746e-07	0.000138461
PLXNC1	463.909	-1.43709	8.92153e-07	0.00019217
PNKD	1091.02	1.04739	0.00194869	0.0479249
PNMT	8.412	2.54795	0.000241244	0.0114429
POU2AF3	51.4175	1.05143	0.00155714	0.0414987
PPP1R14A	79.882	1.80283	0.000197245	0.00980766
PPP1R1B	74.7439	2.90008	8.02332e-11	1.12999e-07
PPP1R3B	311.217	1.02396	2.37024e-05	0.00235852
PPP1R3G	16.4649	2.43476	0.000248541	0.0116085
PRELID3B	710.065	1.072	0.00196214	0.0481565
PREX2	1112.29	-1.31911	0.000200422	0.00983786
PRKAG2	655.661	1.05648	0.00101817	0.0313924
PRKAG2-AS2	8.15651	2.16493	0.000764741	0.0260541
PRKX	1099.32	1.61909	0.000146915	0.00811069
PROM1	641.846	-1.87088	8.02437e-05	0.00558554
PROS1	294.995	-1.08352	2.30467e-06	0.000417784
PRR15	107.033	1.01882	0.000937879	0.0296062
PRR15L	44.1896	1.5668	0.00170468	0.0440833
PTGIS	47.6605	-1.95477	0.000542163	0.0201883
PTHLH	114.333	-1.11823	0.000863364	0.0278789
PTPRN	6.06759	-3.92072	0.000194499	0.00973483
RAMP2-AS1	55.3321	1.84853	0.000238368	0.0113764
RAP1GAP	355.183	1.01151	7.49887e-05	0.00532158
RASD1	779.551	2.09462	2.13644e-07	6.41247e-05
RASGEF1B	354.692	1.93219	7.36978e-05	0.00530277
RASGRP1	257.973	-1.17981	7.27972e-05	0.00528907
RBFOX2	69.6458	2.51146	0.000311291	0.0135701
RCN1	494.005	1.32829	9.46166e-05	0.00614303
RFLNB	148.123	1.32215	0.000160975	0.00856773
RGS6	40.4356	1.15639	0.00175414	0.0447929
RHOU	983.165	2.00417	7.24163e-08	3.08342e-05
RIPOR3	190.065	-1.19455	2.38794e-05	0.00236328
RNF125	19.6959	1.79852	0.00118136	0.0344968
RNFT2	73.7647	-1.12069	1.89927e-05	0.00199849
ROBO2	643.908	-1.40667	8.19626e-05	0.00566285
RORB	1968.56	1.3858	0.000368335	0.0153618
RYR3	313.466	2.23963	4.30635e-05	0.00360023
SAA1	20.6028	-3.21137	0.00104505	0.0316787
SALL4	47.1877	-1.54566	0.000642564	0.0229779
SAT1	3392.46	1.43815	4.05462e-05	0.00341907
SCARA5	76.511	3.44578	2.51575e-08	1.39757e-05
SCGB1D2	1315.19	5.33022	6.97208e-15	4.25506e-11
SCGB1D4	233.722	5.61962	6.24927e-07	0.000141257
SCGB2A1	1033.9	1.79451	0.000281406	0.0125665
SCUBE1	57.0149	2.44271	0.000172347	0.00901573
SEC14L1	2099.6	1.55127	4.83412e-08	2.17947e-05
SECTM1	32.9521	-1.00373	0.00079811	0.0265888
SELPLG	265.352	-1.10741	1.19827e-05	0.00138855
SERPINA4	72.5682	3.13694	6.85991e-15	4.25506e-11
SERPINA5	1093.57	1.79785	4.51641e-05	0.00370812
SERTAD4	53.4681	-1.28434	1.00371e-05	0.00120615
SEZ6L	42.0257	3.46688	2.90939e-06	0.000484254
SGIP1	332.277	-1.81747	0.000292969	0.0129252
SGK1	2360.87	2.22399	7.43156e-05	0.00530277
SH3D21	325.604	1.27749	0.000164041	0.00868043
SHISA6	448.813	1.48558	0.000146814	0.00811069
SLAMF7	38.1738	-1.63018	1.2124e-05	0.00138902
SLC13A5	8.8303	-1.69211	0.000326495	0.0140705
SLC14A1	21.6734	-1.1426	0.00112072	0.0333106
SLC15A1	91.3819	-1.41995	0.000801449	0.0265888
SLC15A2	2379.09	3.2932	8.706e-08	3.46518e-05
SLC24A2	7.31438	4.74004	0.00197653	0.0484447
SLC25A1	941.741	1.38436	1.57474e-05	0.00171007
SLC25A48	19.1129	4.33363	0.000125558	0.00731283
SLC26A4	172.776	2.74714	6.09538e-05	0.00470887
SLC28A3	52.8832	3.95023	0.000273201	0.012412
SLC2A12	52.7574	-1.89015	0.000104463	0.00655944
SLC2A8	263.895	1.46765	2.72739e-05	0.0026282
SLC38A1	395.533	-1.26005	3.02177e-05	0.00282273
SLC3A1	8.40483	3.1832	0.000910138	0.0289804
SLC5A1	57.6019	2.71587	1.29731e-05	0.0014753
SLC5A9	166.254	2.87604	5.37021e-07	0.00013656
SLC6A20	11.1406	-1.77757	0.000509948	0.0192112
SLC7A4	10.4657	3.07338	0.00144214	0.0397113
SLC7A5	271.106	-2.03147	1.66902e-08	1.17531e-05
SLC8A1	646.498	-1.47464	2.03253e-07	6.30739e-05
SLCO5A1	58.3056	-1.08158	1.34741e-06	0.000276543
SMIM24	36.1347	3.17851	8.73806e-05	0.00590057
SNAI2	1183.84	1.59144	0.000406872	0.016481
SORCS3	12.8906	-3.47119	2.14813e-09	2.185e-06
SPAG4	96.6983	1.07892	9.01431e-06	0.00113823
SPDEF	537.385	1.68716	8.12787e-06	0.00103342
ST6GALNAC1	1134.93	1.52092	0.000706937	0.0246539
STEAP4	334.141	5.32773	5.5023e-07	0.000138002
STRA6	4405.53	-1.05667	2.14693e-06	0.000393082
SULF1	896.156	-1.50578	0.000122428	0.00720762
SULT1E1	17.1172	7.1801	0.000627319	0.022565
SULT2B1	36.6048	2.83131	3.24324e-05	0.00292748
SV2C	64.0794	-1.91323	5.7256e-05	0.00444195
SYBU	209.666	1.81451	0.000147772	0.00811069
SYT2	122.814	1.88809	8.56139e-05	0.00580557
TAGLN	199.241	-1.33517	0.000326613	0.0140705
TAS2R43	7.61019	6.05367	7.4284e-05	0.00530277
TCEA3	659.982	1.59537	3.85726e-06	0.000603611
TENM2	347.706	5.14548	2.96426e-07	8.34965e-05
TENT5A	210.762	1.14691	0.00191975	0.047434
TEX56P	32.759	1.41355	0.00146099	0.0398303
TFCP2L1	671.426	1.85352	9.61966e-07	0.000203009
TFPI2	779.305	1.99097	0.000390041	0.0160478
TGFB3	873.412	-1.05924	7.78402e-05	0.00546045
THEM4	487.563	1.91033	0.00138653	0.0388164
THUMPD1	505.757	1.02275	0.00162844	0.0426539
TIPARP	919.655	1.47182	0.000182534	0.00930922
TM4SF1	727.887	1.73894	0.000650835	0.0231136
TM4SF4	7.68202	6.06385	0.000132895	0.0076515
TMEM101	951.118	1.91287	2.20457e-08	1.36653e-05
TMEM132C	1193.52	1.04226	0.00047486	0.018381
TMEM156	9.16048	-1.75953	0.000234961	0.011278
TMEM196	50.2777	2.61688	0.000629827	0.0226108
TMEM47	19.1104	-1.13268	0.000822853	0.0270964
TMPRSS11A	12.2515	2.1095	0.00103987	0.0316787
TNFRSF9	7.47411	-2.07978	0.00097789	0.0304918
TOX2	65.0398	1.81872	0.000449414	0.0176953
TPGS1	10.6471	2.31513	0.000199029	0.00982215
TRAK1	2561.31	1.01861	0.000485909	0.0185344
TRH	79.8393	2.14266	8.05387e-05	0.00558554
TSC22D3	472.763	2.14385	7.33148e-07	0.000163698
TSPAN7	10.7346	-2.08142	7.724e-05	0.00543918
TSPAN8	21.3153	-2.53369	2.78134e-06	0.00047592
TTR	6.06334	3.59285	9.17966e-05	0.00600847
TUBA4A	82.4148	-2.16444	2.95253e-06	0.000487007
UNC93A	6.05513	-2.53842	0.000124569	0.00731003
VAV3	128.795	-1.10196	0.000340259	0.0143875
WDFY4	317.568	-1.29683	4.14801e-06	0.000636649
WNK4	284.583	1.6852	6.20777e-09	5.16627e-06
WNT2	575.255	-1.36219	4.5051e-06	0.000681686
ZBTB16	595.036	3.63176	2.48384e-07	7.33495e-05
ZG16B	19.6389	2.6385	4.95222e-06	0.000737157
ZNF385B	30.6819	-2.52755	2.6488e-08	1.42638e-05

## Sheet: Prolif vs LH 7.8
GeneID	Base mean	log2(FC)	P-value	P-adj
A2ML1	475.193	5.24318	2.39003e-24	3.80014e-22
ABAT	770.28	1.83375	1.57325e-05	0.000127533
ABCA1	10424.9	1.30957	1.60851e-05	0.000130154
ABCA10	241.617	1.314	7.72612e-07	8.67864e-06
ABCA12	799.696	4.18833	7.15711e-13	2.65972e-11
ABCA13	238.156	-1.53435	0.000653462	0.00338045
ABCA3	566.511	1.17539	0.000121214	0.000772271
ABCA5	1804.18	1.06235	4.2974e-05	0.000311781
ABCB4	84.4019	-1.02134	0.00109586	0.00526409
ABCB9	215.95	1.74966	1.28031e-15	7.07186e-14
ABCC8	4101.01	3.60443	1.32119e-13	5.47666e-12
ABCD2	95.3777	-2.43517	1.04471e-08	1.80413e-07
ABCF1	10.4968	-4.13909	0.00166986	0.00753366
ABCG1	2565.75	3.81931	1.49722e-35	6.17186e-33
ABHD11	231.121	1.4564	1.77848e-11	5.1954e-10
ABHD15	30.6378	1.01555	4.02952e-05	0.000295345
ABHD17AP3	5.01312	-2.16885	0.0085542	0.0292319
ABHD17C	124.013	1.6796	2.57144e-13	1.02765e-11
ABHD5	3004.33	1.49583	8.25934e-17	5.47181e-15
ABO	254.685	1.93422	4.41802e-07	5.30162e-06
ABTB3	171.29	-1.05358	0.00660951	0.0236806
ACACA	53.8184	1.33532	0.0028436	0.0117962
ACBD7	16.7362	-1.39928	0.000271322	0.00156305
ACE	1901.77	1.72827	6.8077e-05	0.000466132
ACKR2	71.8803	1.44793	0.00489959	0.0185075
ACOT1	166.824	2.32339	3.92903e-06	3.74241e-05
ACOT11	425.088	1.14795	1.0081e-06	1.09786e-05
ACOT4	2.88415	3.06499	0.00635162	0.0229524
ACP3	1291.1	4.38673	6.82772e-62	1.89981e-58
ACSL3	1816.17	1.24985	0.000677149	0.00348678
ACSL4	3214.8	1.71005	5.42719e-06	4.96137e-05
ACSL5	18458.5	2.29137	7.2479e-19	6.08823e-17
ACSM1	80.4632	1.5908	2.70278e-08	4.23812e-07
ACSM3	537.212	1.65244	4.08065e-05	0.000298407
ACTBP15	14.7997	-2.11595	4.09348e-06	3.88079e-05
ACTG1P4	3.03861	-2.22107	0.00201504	0.00886633
ACTN2	23.7544	1.37589	0.00297001	0.0122175
ACTRT3	29.1699	-1.22765	1.96484e-06	1.99988e-05
ACVR1C	17.3823	1.83109	0.00362643	0.0144524
ACVRL1	1175.98	1.83143	9.15909e-26	1.80426e-23
ADAM12	1742.64	-3.15837	9.29033e-08	1.30722e-06
ADAM28	836.391	-1.78955	1.05834e-07	1.46327e-06
ADAM29	5.41985	-2.61168	0.014325	0.0448108
ADAM7	2.14612	-4.10796	0.000412231	0.00225627
ADAMDEC1	16.4433	-1.60448	0.00791229	0.0274556
ADAMTS1	3069.73	1.77984	3.55331e-07	4.36034e-06
ADAMTS14	44.4026	-2.88778	1.8663e-08	3.03683e-07
ADAMTS15	313.487	3.44028	2.0514e-25	3.93656e-23
ADAMTS16	854.136	-3.03437	4.22832e-08	6.36823e-07
ADAMTS19	766.884	-1.7957	1.02978e-21	1.22582e-19
ADAMTS19-AS1	3.39998	-2.88516	0.000130473	0.00082113
ADAMTS3	103.721	-1.20622	6.42436e-05	0.000444257
ADAMTS5	501.092	2.09539	3.9706e-19	3.39945e-17
ADAMTS6	770.651	-2.20611	1.94712e-24	3.1408e-22
ADAMTS8	1801.4	5.85189	6.48973e-23	8.97276e-21
ADAP1	172.224	1.12044	0.000334552	0.00187255
ADCY1	618.365	1.62812	8.11518e-07	9.06847e-06
ADCY3	2311.31	1.09425	7.69998e-14	3.30891e-12
ADCYAP1R1	506.542	-3.3181	3.22609e-05	0.000242775
ADGRB1	38.2359	-3.28954	7.65594e-11	2.03124e-09
ADGRB2	90.5302	-2.31953	6.30508e-07	7.22715e-06
ADGRE1	6.28661	-1.89	0.000405418	0.00222555
ADGRF1	138.571	3.34257	0.0024555	0.0104285
ADGRL1-AS1	5.21482	-1.36338	0.0161031	0.0494284
ADGRV1	401	-1.58856	5.59493e-08	8.19363e-07
ADHFE1	13.7235	1.03901	0.00295723	0.0121723
ADIPOR1	915.749	1.05854	2.03137e-13	8.2066e-12
ADIPOR2	498.988	1.03959	6.7135e-12	2.10482e-10
ADM	126.655	2.27785	4.28526e-06	4.03852e-05
ADORA1	8.68911	-2.0996	1.2415e-05	0.000103543
ADRA2B	5.00589	2.82886	0.00146281	0.00672909
ADRB2	35.9324	-1.49364	4.36597e-07	5.24482e-06
AFDN-DT	225.218	1.9399	6.087e-11	1.63446e-09
AFF2	257.387	-1.61772	5.29585e-06	4.8693e-05
AFMID	361.823	1.11679	1.8749e-05	0.000149696
AGAP2	88.1412	-1.97881	1.63935e-24	2.74375e-22
AGPAT5	564.904	1.32078	0.00041484	0.00226832
AGT	12.1894	-2.2592	0.000233979	0.00137669
AGTR2	8.77761	-3.91626	0.000549249	0.00290066
AGXT2	4.91497	1.8137	0.0103177	0.0341826
AHNAK	204959	1.17165	1.55945e-05	0.000126598
AHR	228.799	1.04485	2.5281e-05	0.000196082
AHSG	2.43228	4.06625	0.00190757	0.00844185
AIDAP2	35.3138	2.03411	0.000877947	0.00434291
AIF1L	144.307	-1.39999	2.73852e-08	4.28086e-07
AIMP1	1113.13	1.00562	0.00276224	0.0115404
AJAP1	32.4917	-3.21177	4.71967e-10	1.07533e-08
AJM1	55.7362	1.67729	1.00193e-06	1.09168e-05
AJUBA	209.023	-1.86813	5.15843e-10	1.16339e-08
AK4	166.328	2.2588	3.48388e-14	1.5957e-12
AK4P1	51.9571	2.14092	9.94439e-12	3.03652e-10
AK7	319.98	1.2061	0.0107214	0.0352409
AKAP12	2017.15	1.22772	8.0701e-09	1.42008e-07
AKAP13	11055.2	1.44087	3.83329e-60	8.53291e-57
AKNAD1	17.6312	-1.38212	0.000161786	0.000993203
ALAS2	46.4774	-2.92134	7.39039e-05	0.000499727
ALCAM	3035.29	1.09682	5.00318e-05	0.000357531
ALDH1A1	5195.24	-1.07241	3.27461e-09	6.31276e-08
ALDH1A2	9674.99	-1.177	4.40986e-09	8.26292e-08
ALDH1A3	1037.99	4.61486	6.38814e-60	1.29273e-56
ALDH1L1	260.433	1.59946	9.53487e-05	0.00062407
ALDH3B2	877.487	3.7776	2.01407e-26	4.22954e-24
ALDH6A1	3578.8	1.92689	3.14085e-15	1.66465e-13
ALK	50.7231	1.03197	0.00129335	0.00608152
ALKAL2	158.527	2.07699	4.33771e-11	1.19502e-09
ALLC	1.48937	3.39823	0.00369986	0.0146886
ALOX12B	177.379	5.18824	1.71485e-24	2.84869e-22
ALOXE3	11.9535	5.18049	2.27748e-07	2.89695e-06
ALPG	39.7449	-3.96002	0.00225516	0.00973245
ALPK3	306.41	-1.59749	5.35275e-09	9.82293e-08
AMD1	1808.24	1.14944	2.65217e-24	4.18704e-22
AMIGO2	782.255	1.93433	6.34562e-06	5.69112e-05
AMN	27.3522	2.42307	5.80072e-09	1.05494e-07
ANG	177.085	2.76155	2.98105e-06	2.91941e-05
ANGPT1	121.193	1.50361	4.83782e-05	0.000346715
ANGPTL1	241.136	2.59735	1.48225e-15	8.12683e-14
ANGPTL4	129.037	1.44288	9.24222e-05	0.000607954
ANGPTL5	7.0082	4.39697	8.15806e-06	7.11592e-05
ANK1	36.8299	-1.32905	1.32225e-05	0.000109499
ANK2	2524.28	-2.16949	5.80782e-08	8.48308e-07
ANKFN1	331.15	1.21872	0.000709253	0.00362109
ANKRD18CP	21.3119	-2.11756	1.14003e-06	1.22358e-05
ANKRD20A5P	4.76685	-3.26755	0.000189819	0.00114416
ANKRD20A7P	45.1021	2.86557	1.71647e-08	2.82057e-07
ANKRD22	42.4593	1.71778	0.0068116	0.0242602
ANKRD29	144.23	-1.65968	1.08478e-15	6.06715e-14
ANKRD33B	40.9068	2.31339	1.00233e-10	2.60348e-09
ANKRD35	1969.24	3.77882	1.7244e-38	9.86452e-36
ANKRD37	14.0152	1.64481	2.86925e-05	0.000218881
ANKRD50	1588.43	-1.132	2.10204e-18	1.64759e-16
ANKRD53	82.4695	1.02253	0.00240818	0.0102772
ANKRD9	11.8987	1.9129	5.15175e-05	0.000366266
ANKS1B	81.5672	-1.9301	1.16404e-07	1.58674e-06
ANLN	389.994	-2.47361	1.5793e-08	2.62548e-07
ANO1	3353.42	-1.08618	0.000127836	0.000806584
ANO2	174.333	1.03938	0.000324705	0.00182432
ANO4	926.507	-2.82703	8.3188e-13	3.07092e-11
ANO7	15.9934	-1.77836	5.12341e-06	4.72832e-05
ANTXR1	7868.51	-1.24078	2.00237e-13	8.1189e-12
ANTXRLP1	2.80053	-2.33165	0.00487421	0.0184273
ANXA1	7728.8	1.94207	4.3202e-07	5.20323e-06
ANXA2	28946.8	2.12809	6.14348e-10	1.35466e-08
ANXA2P1	240.345	1.75463	9.44819e-08	1.32608e-06
ANXA2P2	351.236	2.06449	5.57598e-10	1.25122e-08
ANXA4	6073.95	1.6914	1.11872e-05	9.43285e-05
AOAH	258.084	-1.0444	0.00629945	0.0227972
AP1M2	942.376	1.13617	1.44481e-13	5.95567e-12
APLP1	70.5826	-1.37147	3.27271e-05	0.000245453
APOBEC3B	133.553	-2.22696	0.00040692	0.00223122
APOD	2411.22	3.39834	4.89237e-21	5.33844e-19
APOL1	2294.09	2.82802	9.17984e-09	1.59893e-07
APOL2	2465.66	2.70005	1.04283e-29	2.93839e-27
APOL3	236.551	1.22729	0.00406232	0.0158478
APOL4	1061.39	1.47269	1.01367e-07	1.40762e-06
APOO	342.439	1.2698	4.44774e-11	1.22231e-09
AQP3	753.317	3.68538	2.10222e-10	5.11985e-09
AR	1895.55	-1.79456	1.38871e-26	2.97238e-24
ARG2	704.678	3.99561	5.80458e-13	2.19745e-11
ARHGAP20	1485.5	1.50823	1.35428e-09	2.81374e-08
ARHGAP22	53.3668	-1.53048	5.32876e-08	7.83476e-07
ARHGAP25	131.332	-1.0181	4.69141e-07	5.57857e-06
ARHGAP28	521.583	-1.71781	1.9579e-19	1.73637e-17
ARHGDIG	1.90413	3.13202	0.0045646	0.0174584
ARHGEF38	105.82	1.58484	3.29141e-05	0.000246524
ARHGEF5	633.733	1.63935	2.32803e-05	0.0001826
ARID5B	2428.06	1.09028	0.00628492	0.0227557
ARL14EPP1	5.35437	-1.73645	0.00255027	0.010768
ARL15	135.244	-1.00634	0.000195093	0.00117372
ARL4D	355.393	1.75127	6.22641e-13	2.34518e-11
ARMC12	16.8371	1.93232	5.20545e-07	6.11791e-06
ARMCX4	791.394	-1.7049	2.62704e-25	4.95576e-23
ARMH4	277.127	-1.66012	1.27413e-23	1.9035e-21
ARNT2	740.604	-1.99062	1.07805e-12	3.90838e-11
ARNT2-DT	20.2841	-2.34828	8.53523e-11	2.24666e-09
ARRDC1	282.166	1.30851	7.18668e-12	2.23742e-10
ARRDC2	89.2206	1.24428	0.000121813	0.000774953
ARSA	620.618	1.25351	4.78018e-12	1.5399e-10
ARSD	1410.17	1.06155	1.44904e-12	5.11995e-11
ARSF	14.6866	5.00405	1.05601e-06	1.14444e-05
ARSI	16.2256	-3.04628	4.92954e-06	4.57214e-05
ARSL	240.948	-1.09864	2.35393e-05	0.000184372
ART5	4.02384	-3.76542	8.64738e-07	9.60532e-06
ASCL1	9.48196	-2.20349	6.37107e-05	0.000440846
ASF1B	55.8027	-2.93378	4.6128e-07	5.49978e-06
ASIC2	155.59	-5.90425	5.80287e-23	8.07324e-21
ASIP	17.8387	1.79443	2.14184e-06	2.16518e-05
ASPG	27.8963	2.03279	3.46951e-11	9.71462e-10
ASPHD2	38.4562	-1.32411	7.52883e-06	6.6268e-05
ASPN	249.33	-2.44566	7.99451e-15	3.94585e-13
ASRGL1	3360.03	1.76876	8.43882e-23	1.14542e-20
ASS1	2013.36	-1.08703	7.24563e-06	6.40285e-05
ASS1P2	14.5459	-1.64663	7.00308e-07	7.94539e-06
ASTL	55.5896	3.02174	1.18298e-06	1.2648e-05
ASTN1	84.3432	-4.16113	6.17241e-31	1.9083e-28
ASZ1	2.85697	-1.88151	0.00549919	0.0203613
ATAD5	373.477	-1.04631	1.5644e-06	1.62803e-05
ATG16L1	1393.82	1.3094	8.61798e-23	1.16264e-20
ATG9B	126.432	4.34851	5.58401e-09	1.02136e-07
ATL3	1710.79	1.12629	4.50446e-14	2.03386e-12
ATOH8	214.321	3.58933	6.36958e-14	2.7856e-12
ATP12A	522.023	10.6733	2.65958e-12	8.92945e-11
ATP13A4	473.452	4.19188	2.74872e-22	3.49637e-20
ATP1A1	15811.5	2.02106	4.95742e-23	6.98432e-21
ATP1A2	727.189	-5.47782	2.41939e-28	6.19031e-26
ATP1A4	7.18396	-4.3963	1.15226e-05	9.6826e-05
ATP2A3	248.331	-1.27165	0.000935057	0.0045958
ATP2B2	677.209	3.64882	1.56845e-16	1.01789e-14
ATP2B3	62.3179	1.1003	0.0079304	0.0274927
ATP5MFP3	2.03484	3.76705	0.000836346	0.00416489
ATP6V0D1-DT	1.26131	-2.88354	0.0162466	0.0497729
ATP6V1A	1946	1.12777	9.01596e-07	9.96006e-06
ATP6V1C2	1879.83	3.79897	2.32873e-21	2.63135e-19
ATP6V1G1	1992.61	1.75746	1.81678e-12	6.25062e-11
ATP6V1H	1246.72	1.30749	8.18253e-08	1.16311e-06
ATP7B	1870.95	1.18761	2.91683e-05	0.00022213
ATP8B3	173.97	-1.31078	0.000134128	0.000841278
ATXN7L3B	8.38101	-1.11467	0.00419783	0.0163049
AUNIP	43.2802	-1.41623	0.00501967	0.0188906
AURKA	353.414	-1.31906	0.000770475	0.00387763
AURKB	82.3898	-1.94244	0.00365735	0.0145562
AVIL	638.05	1.74413	4.01322e-06	3.81444e-05
AVPI1	56.376	1.97323	3.01676e-13	1.18227e-11
AVPR1B	79.3803	2.07092	4.27748e-05	0.000310658
AZGP1	97.5536	5.03095	2.81246e-19	2.45512e-17
B3GALT5	20.1665	-1.49436	8.44847e-06	7.33189e-05
B3GALT5-AS1	21.2992	-1.28896	9.73681e-05	0.000634861
B3GAT1	5.56919	-1.89172	0.0110673	0.0361494
B3GAT1-DT	5.00787	2.54857	0.00416005	0.0161893
B3GNT2	503.396	1.55723	4.26015e-16	2.52883e-14
B3GNT3	43.1679	4.56858	6.14646e-10	1.35466e-08
B4GALNT2	45.6363	5.55026	5.34057e-06	4.90029e-05
B4GALNT3	3334.09	1.36655	0.0109686	0.0359009
B4GALNT4	651.978	-1.30481	1.44544e-11	4.28436e-10
B4GALT1	3379.07	-1.27143	8.75235e-07	9.71223e-06
B4GALT4	1187.55	1.81345	1.78538e-29	4.96781e-27
B9D1	352.539	-1.25455	2.83846e-15	1.51521e-13
BAALC	58.1738	2.87361	3.64471e-18	2.79763e-16
BAALC-AS2	3.85314	2.93218	0.00272391	0.0113977
BACE2	1877.85	1.5036	4.72911e-15	2.42557e-13
BAG2	71.1666	-1.14699	3.63006e-07	4.44718e-06
BAG5	991.714	1.42484	4.50887e-07	5.39249e-06
BAIAP2	658.562	1.09896	3.6089e-05	0.000267513
BAIAP2L2	162.375	3.36986	3.44483e-12	1.13771e-10
BAK1P2	2.17372	3.22288	0.0066836	0.0238846
BANF1P1	16.8449	-1.28144	0.0063822	0.0230368
BANK1	157.03	1.55863	0.000318106	0.00179131
BARX2	21.3883	1.88389	0.00548461	0.0203295
BBOF1	340.81	1.06627	0.00146564	0.00673933
BCAS3	2253.17	1.10372	3.69161e-12	1.21561e-10
BCHE	38.7267	-2.9159	1.86053e-08	3.03011e-07
BCKDHB	2682.39	1.75359	0.000889137	0.00439241
BCL11A	71.8912	-2.05882	3.00808e-13	1.18095e-11
BCL2A1	25.5808	-1.34471	0.00760968	0.0265712
BCL6	479.462	2.43497	3.27765e-08	5.03176e-07
BCO1	183.963	2.31194	6.21344e-08	9.01638e-07
BEND2	2.8916	-2.83391	0.00298784	0.0122802
BEND3P1	3.16223	-1.97031	0.0140542	0.0441064
BEND5	81.3634	-1.64939	5.79684e-08	8.4726e-07
BEST4	15.0063	1.76629	0.00255953	0.0107989
BEX1	50.9756	-4.32215	8.24701e-13	3.05455e-11
BEX2	74.5983	-1.90394	4.35412e-07	5.23907e-06
BEX5	9.5383	-1.17877	0.0111351	0.0363176
BFSP1	38.1821	-1.61617	1.26813e-06	1.34614e-05
BGN	1453.16	-2.33701	8.16021e-07	9.11026e-06
BHLHA15	15.8606	2.01787	4.87198e-05	0.000348968
BHLHE41	222.275	-2.2059	7.70909e-25	1.34066e-22
BICDL2	159.115	2.23371	4.87303e-18	3.66465e-16
BIRC3	963.206	2.2935	5.12465e-08	7.5979e-07
BIRC5	32.2634	-2.92844	1.10172e-07	1.51144e-06
BLID	8.46283	-1.5862	0.000456532	0.0024678
BLK	12.8961	-2.8867	5.60899e-05	0.00039449
BLM	267.495	-1.98062	2.57767e-05	0.000199371
BMAL1	503.083	1.12008	1.03488e-08	1.79133e-07
BMF	38.4971	-1.78206	2.22564e-08	3.56095e-07
BMP3	8.55628	-3.14523	0.00519679	0.0194421
BMP4	237.434	1.57649	6.06286e-10	1.34288e-08
BMP7	117.488	-2.50136	0.000794503	0.00398594
BMX	33.1582	-1.28483	0.0022271	0.00963
BNC2	1129.23	-2.26255	3.55534e-11	9.92996e-10
BNIP3	805.19	1.91912	1.93484e-51	2.8713e-48
BNIP3L	3069.29	1.36601	3.30351e-14	1.51621e-12
BNIPL	43.3132	1.23292	0.000887964	0.00438856
BPIFA2	7.14425	4.44505	1.02691e-05	8.73152e-05
BPIFB1	122.227	-5.83346	6.32657e-07	7.24804e-06
BRAFP1	18.6255	-1.7038	2.46611e-05	0.000191741
BRCA1	1036.56	-1.1754	6.25201e-05	0.000433821
BRCA2	491.997	-2.01217	2.48451e-05	0.000193038
BRD3OS	3.48586	-1.51339	0.0126368	0.0404101
BRD7P4	208.422	1.34207	0.000314309	0.00177217
BRI3	402.558	1.01196	6.4303e-08	9.30075e-07
BRINP1	913.233	5.30755	1.17921e-23	1.7736e-21
BRINP2	9.81848	-5.63225	9.31269e-13	3.41516e-11
BRIP1	471.275	-1.95402	5.22618e-05	0.000370729
BRSK2	15.6523	1.6046	0.000958249	0.00469217
BSPRY	305.431	1.39533	1.11117e-11	3.36069e-10
BST1	264.625	1.77903	4.25821e-29	1.15595e-26
BST2	246.264	-1.59559	0.000123023	0.000780867
BTAF1	5292.8	1.35264	1.43413e-06	1.50513e-05
BTBD3	2506.32	1.87477	4.1171e-16	2.45702e-14
BTBD6	478.373	1.06474	2.69792e-23	3.9252e-21
BTBD8	348.407	1.21365	4.10687e-09	7.73426e-08
BTG2	105.281	1.28429	1.23207e-05	0.000102796
BTK	85.8411	-1.34388	1.88311e-07	2.44277e-06
BTNL9	26.6812	1.75355	0.00293525	0.0120914
BUB1	530.584	-1.61517	0.00881986	0.0299786
BUB1B	920.464	-2.4344	0.000117775	0.000752703
BVES	133.6	2.39242	1.55074e-11	4.56003e-10
BVES-AS1	10.3678	2.63005	2.56079e-05	0.000198203
C10orf82	13.4729	-3.28611	5.74412e-10	1.28558e-08
C11orf52	178.838	1.87344	1.42876e-15	7.85291e-14
C15orf48	272.713	2.79542	5.71116e-05	0.000400663
C15orf62	34.5392	1.26493	0.00196097	0.00865067
C16orf54	13.1623	-1.34128	0.00398259	0.0155777
C16orf86	48.1192	1.0752	1.92011e-07	2.48498e-06
C19orf48	85.2365	-1.1233	0.000841916	0.00418884
C1orf115	38.5173	1.50507	1.92175e-06	1.95961e-05
C1orf122	14.5098	1.16383	0.00288469	0.0119262
C1orf21	447.773	1.45389	9.00577e-11	2.35568e-09
C1orf210	53.7218	1.43113	1.04092e-06	1.13028e-05
C1QTNF6	31.8618	-1.66859	2.64894e-08	4.1671e-07
C1R	9072.04	1.7841	6.86141e-13	2.56267e-11
C1S	16854.9	1.09884	2.46395e-05	0.000191641
C2CD4A	137.968	6.92863	5.6424e-15	2.84807e-13
C2CD4B	60.5958	5.80204	1.07281e-12	3.89573e-11
C2orf88	887.817	1.45061	1.01923e-12	3.71326e-11
C4A	17.7012	3.97976	0.0008889	0.00439221
C4BPA	1123.7	5.38028	3.67361e-08	5.56668e-07
C4orf19	18.0473	-1.10035	0.000202243	0.00121019
C5AR2	32.3443	-3.38135	1.04773e-27	2.48112e-25
C6orf118	89.7501	-1.36488	0.00280783	0.0116914
C6orf132	569.263	1.01658	0.0147697	0.0459631
C6orf141	165.546	2.21754	1.25204e-11	3.76627e-10
C7	202.039	2.42159	2.14046e-10	5.19593e-09
C8orf34	66.8181	1.00855	0.0148756	0.0462408
C8orf34-AS1	14.1757	1.57118	0.00108309	0.005214
C9orf152	236.584	1.9176	1.89546e-07	2.45451e-06
CA11	343.312	-3.41719	2.98357e-36	1.35539e-33
CA12	1300.84	-1.64977	1.11085e-05	9.37879e-05
CA4	90.3831	2.34252	6.47692e-07	7.40505e-06
CA7	1.44343	-3.10767	0.011668	0.0377844
CA9	15.4772	-1.49893	3.54182e-05	0.000262978
CACHD1	1037.66	-1.23483	5.86848e-10	1.30894e-08
CACNA1B	49.0578	-1.30938	0.00405823	0.0158346
CACNA1I	10.6681	-2.55627	5.43535e-05	0.000383976
CACNA2D2	82.6715	-2.81248	8.16753e-23	1.11539e-20
CACNB2	424.143	1.07276	2.30487e-05	0.000180848
CACNB4	18.8116	-1.26941	0.00259121	0.0109161
CACNG7	2.3957	-4.37814	0.00182354	0.00812165
CADM1	2069.16	-1.19737	0.000129697	0.000816475
CADM2	6.30989	-1.41103	0.00841401	0.0288342
CADM4	193.176	-2.11055	8.05444e-24	1.25379e-21
CADPS	124.914	-3.63057	1.76341e-16	1.12475e-14
CALCRL	1190.02	1.22428	4.3655e-09	8.20051e-08
CALHM2	134.318	1.04886	4.13576e-05	0.000301546
CALHM5	12.6507	-1.12025	0.00232921	0.0100016
CALN1	12.4267	-2.2012	3.76747e-05	0.000277971
CAMK1G	28.9671	-1.20585	0.00703202	0.0249058
CAMK2A	9.8159	-1.84333	0.0012705	0.00598418
CAMK2B	59.8715	2.57154	9.80942e-07	1.07196e-05
CAMK4	64.6047	-1.87354	8.90677e-05	0.000589372
CAMKK1	380.326	1.0432	1.31416e-06	1.3897e-05
CAMP	14.3426	4.08014	7.99571e-05	0.000536259
CAMSAP3	249.465	1.26836	1.53484e-12	5.39738e-11
CAND2	81.2109	-1.4737	5.1992e-06	4.78834e-05
CAP2	382.752	-1.45723	1.90934e-24	3.10232e-22
CAPN12	36.0722	1.224	0.000335323	0.00187498
CAPN14	8.41431	-1.40342	0.0125989	0.0403007
CAPN6	2058.17	4.14374	7.99933e-20	7.48172e-18
CAPN8	68.7905	6.44799	2.37375e-16	1.48426e-14
CAPN9	39.829	-1.44013	0.000373484	0.00206604
CAPS2	136.371	-1.0433	1.53144e-06	1.59746e-05
CAPZA2	3858.75	1.66202	1.02648e-13	4.31939e-12
CARD10	209.61	-1.67177	1.67585e-18	1.3375e-16
CARD14	11.9283	1.32693	0.00135977	0.00633629
CARMIL1	1579.41	1.05524	5.7319e-06	5.20572e-05
CARMN	28.836	-1.78605	2.77141e-10	6.59098e-09
CASC19	5.26926	2.58683	0.0020628	0.00903184
CASZ1	823.99	2.07425	9.34327e-24	1.42453e-21
CATSPERB	6.77355	4.97198	0.00458292	0.0175225
CBFA2T3	39.318	-2.17657	2.48428e-12	8.40427e-11
CBLC	218.533	1.54505	4.50342e-07	5.39249e-06
CBLN1	152.465	-4.69218	3.56468e-15	1.86705e-13
CBLN3	27.6895	1.02205	0.0061015	0.0222
CBLN4	151.981	-1.97294	1.03257e-05	8.76958e-05
CBR3	20.8397	1.76181	0.000217327	0.00128902
CBX2	153.315	-1.14444	0.000180838	0.00109596
CBX4	438.323	1.06008	2.08866e-33	8.01613e-31
CBX5	1537.36	-1.08112	1.77556e-07	2.31948e-06
CCBE1	360.838	-3.12928	2.11867e-10	5.15125e-09
CCDC136	255.153	-1.43038	5.14155e-08	7.60977e-07
CCDC148	107.236	-2.34002	2.93494e-28	7.34065e-26
CCDC150	102.174	-1.44412	4.79389e-05	0.000344011
CCDC162P	106.715	2.13129	0.000674264	0.00347675
CCDC183	15.4543	1.22197	0.00204628	0.00897363
CCDC190	2.98666	3.77237	0.00184524	0.00820352
CCDC198	57.3291	-3.03	1.56211e-05	0.000126769
CCDC54	8.23703	2.97237	0.00725346	0.0255316
CCDC68	75.9745	1.44117	0.000244484	0.00142784
CCDC71L	54.0291	1.32428	4.39147e-05	0.000317693
CCDC74A	282.503	-1.40368	1.5263e-10	3.8004e-09
CCDC74B	269.031	-1.43143	5.44892e-07	6.36374e-06
CCDC80	1466.41	-2.55034	1.43444e-10	3.60797e-09
CCL13	10.8867	1.85297	0.00202898	0.00891534
CCL21	45.3193	-2.04171	0.0082843	0.0284811
CCL22	22.5684	-1.63201	0.00415999	0.0161893
CCL8	21.6496	2.13854	0.00587364	0.0215506
CCN3	725.754	3.84006	1.94871e-30	5.78379e-28
CCN4	63.8271	-3.59044	3.07103e-13	1.20143e-11
CCN5	7.87243	-4.71436	1.12308e-05	9.46458e-05
CCN6	12.0196	2.39019	0.00361884	0.0144339
CCNA1	67.3058	-1.57326	0.000218048	0.00129227
CCNA2	389.549	-1.80571	4.42051e-11	1.21632e-09
CCNB1	685.361	-1.96917	2.89566e-09	5.65416e-08
CCNB2	104.458	-2.33652	3.54553e-09	6.78037e-08
CCND2	300.234	-1.06464	5.79636e-06	5.25354e-05
CCNDBP1	1399.49	1.13516	3.69243e-19	3.1858e-17
CCNE2	74.3117	-1.17804	0.00630933	0.0228256
CCNP	1.381	3.26247	0.0100333	0.0333694
CCR4	9.15669	-1.97787	0.00211701	0.00923107
CCR7	84.495	1.52846	6.0561e-06	5.45562e-05
CCR9	12.8226	-1.29167	0.005491	0.0203411
CCZ1	241.701	1.01273	0.00321194	0.0130447
CD177	8.65294	2.2085	0.00767486	0.0267778
CD19	21.7116	-2.33234	2.17843e-05	0.000171531
CD22	41.211	-3.18674	4.0052e-07	4.85598e-06
CD274	26.5619	-1.36419	7.80207e-05	0.000525013
CD300LF	18.1911	-1.51516	0.00197645	0.00871205
CD34	1264.27	-1.07684	0.000643521	0.00333678
CD36	2677.89	4.02897	1.87871e-41	1.26727e-38
CD3G	49.8041	-1.47228	0.00394768	0.0154601
CD44	7944.96	1.90811	1.07139e-11	3.25364e-10
CD55	5138.45	3.2214	3.1296e-07	3.87889e-06
CD80	15.5425	-1.55147	0.000560744	0.00295226
CD84	64.9985	-1.22429	9.45364e-07	1.04023e-05
CD9	2226.7	2.12419	7.29576e-27	1.64044e-24
CD96	279.222	-1.22258	7.41453e-05	0.000501055
CDA	131.785	2.82081	0.000163605	0.00100244
CDC14A	963.087	1.63426	9.51675e-09	1.65502e-07
CDC14B	590.333	1.09937	1.87838e-09	3.79427e-08
CDC20	175.769	-2.26237	8.65819e-10	1.84489e-08
CDC20B	33.0071	-3.94202	7.28678e-05	0.000494433
CDC25C	54.52	-2.74162	1.44063e-06	1.51052e-05
CDC42P5	18.6786	1.13634	0.0128743	0.0410106
CDC42SE2	387.049	1.5993	7.28466e-14	3.15479e-12
CDC45	275.139	-1.79668	0.00791634	0.0274601
CDC6	470.224	-1.8333	6.65227e-05	0.0004576
CDCA2	239.629	-2.55441	5.75432e-09	1.04735e-07
CDCA3	76.0865	-2.22098	3.14291e-10	7.41901e-09
CDCA4	13.0068	-1.23907	0.00211381	0.00922076
CDCA5	46.4951	-2.16523	0.000332103	0.00186115
CDCA7	786.316	-1.38331	3.02385e-05	0.000228975
CDCA7L	167.651	-1.6994	1.72263e-07	2.25829e-06
CDCA8	157.372	-1.95772	1.4511e-09	2.99643e-08
CDCP1	1640.83	1.2025	1.09253e-13	4.57138e-12
CDH1	5665.14	1.01533	0.000652451	0.003376
CDH11	5965.69	-1.28209	4.09426e-12	1.3383e-10
CDH16	205.579	5.36569	7.89906e-15	3.9074e-13
CDH17	14.006	-1.64352	0.000508088	0.00270575
CDH2	874.324	-2.65688	2.52475e-28	6.38647e-26
CDH20	32.6923	-1.46384	2.87203e-06	2.82508e-05
CDH24	299.934	-1.52078	1.39441e-06	1.46759e-05
CDH4	6.20048	-6.23199	6.33958e-09	1.14174e-07
CDH6	159.39	-2.42565	1.65478e-07	2.18348e-06
CDK1	379.096	-2.26387	1.2784e-09	2.66702e-08
CDK14	579.124	-1.40818	8.51077e-11	2.24466e-09
CDK2	312.068	-1.04504	0.000147901	0.000914521
CDK5R1	57.6724	-1.28907	5.47217e-14	2.43135e-12
CDKN1A	501.895	1.27389	0.0110893	0.0362054
CDKN2D	24.7267	1.52891	5.2482e-06	4.82948e-05
CDKN3	108.674	-2.4429	6.47904e-09	1.16309e-07
CDO1	62.4101	-1.44863	3.42845e-06	3.30235e-05
CDON	271.6	-1.44636	1.61769e-08	2.68528e-07
CDR2L	193.89	1.04124	0.000248576	0.00144927
CDS1	492.202	1.79659	6.83843e-12	2.13797e-10
CDX1	2.50453	-3.23519	0.00384924	0.0151788
CDYL2	606.533	1.98811	1.63405e-06	1.69339e-05
CEACAM1	1659.08	1.9413	9.1783e-14	3.89539e-12
CEACAM5	12.981	-4.33345	0.00071832	0.00365732
CEACAM6	3.7417	-4.42201	0.0130284	0.041383
CEBPB	588.816	1.24479	3.34747e-06	3.23274e-05
CEBPD	150.827	3.28028	2.31351e-14	1.0819e-12
CECR2	809.935	1.00588	0.00594693	0.0217585
CELA2B	17.531	1.07846	0.0116809	0.0378207
CELA3A	2.79555	4.31568	0.00388272	0.0152648
CELF5	4.49384	-2.50113	0.000259039	0.00149967
CENPA	31.9844	-2.36822	1.40138e-08	2.34723e-07
CENPF	1819.99	-2.44851	6.22499e-09	1.12474e-07
CENPH	54.346	-1.43883	8.36826e-05	0.000558553
CENPI	168.021	-1.27403	0.00136242	0.00634465
CENPK	184.935	-1.60627	0.000321305	0.00180749
CENPU	265.993	-1.80669	5.31278e-06	4.88e-05
CEP44	400.391	1.39718	2.65077e-08	4.1671e-07
CEP55	107.347	-2.45812	1.71692e-08	2.82057e-07
CEP70	2121.98	1.20873	3.06209e-07	3.80794e-06
CER1	11.2518	-3.23759	1.03589e-06	1.12592e-05
CERKL	306.859	2.34749	7.05168e-05	0.000480679
CEROX1	137.783	-1.03592	0.000745623	0.00377647
CES1	7.70084	2.12268	0.00187658	0.0083229
CES4A	455.548	3.727	1.49865e-18	1.20433e-16
CFAP20DC	64.2293	-1.20193	0.000112427	0.000720803
CFH	53.6524	-2.74118	2.63564e-10	6.29501e-09
CFI	793.453	-1.13708	1.59742e-09	3.27426e-08
CFL1P3	17.5584	-1.15307	0.00621879	0.0225567
CGN	879.117	1.30948	5.40405e-07	6.32129e-06
CGNL1	3099.73	-1.9411	7.46882e-22	8.98681e-20
CH25H	9.28907	-2.21173	0.000739199	0.00374649
CHD5	19.1133	-2.75489	4.28671e-10	9.80702e-09
CHEK1	246.385	-1.76369	2.40016e-11	6.89388e-10
CHGB	13.4001	-3.53876	4.74215e-06	4.41979e-05
CHI3L1	123.909	2.75726	5.69306e-05	0.000399519
CHI3L2	7.336	2.39752	0.00255633	0.0107875
CHL1	122.133	-2.8256	0.00696968	0.0247282
CHMP4C	156.958	1.13296	4.75615e-05	0.000341632
CHMP5P1	5.0022	-3.09716	6.37823e-07	7.30346e-06
CHN1	243.016	-1.31468	1.74551e-07	2.2856e-06
CHODL	202.681	5.41646	1.30682e-20	1.32227e-18
CHORDC2P	5.79534	2.52911	0.00643705	0.0232106
CHP2	48.0613	5.13324	9.77625e-06	8.3443e-05
CHRD	708.355	1.28193	0.00018528	0.00111922
CHRDL1	99.3896	-1.85535	9.04053e-05	0.000596652
CHRM4	6.20316	-1.29209	0.0155761	0.0480692
CHRNA4	35.984	4.30106	3.00952e-06	2.94082e-05
CHROMR	4.91922	-1.79344	0.00475893	0.0180774
CHST10	212.34	-1.02692	4.40366e-17	3.00692e-15
CHST15	307.761	-1.47931	4.30791e-06	4.05386e-05
CHST3	381.064	1.05703	7.81513e-09	1.37848e-07
CHST4	24.6283	2.80305	2.83165e-06	2.78781e-05
CHST7	108.308	2.07589	1.28458e-08	2.17285e-07
CHST8	2.16661	-4.68395	0.000950731	0.00466049
CHSY3	286.299	1.07691	9.29589e-05	0.000611124
CIAPIN1P	27.8499	-2.41931	9.39943e-07	1.03477e-05
CIART	81.5346	-1.73177	3.74479e-06	3.57918e-05
CIB1	1099.28	1.51084	3.83911e-15	2.00137e-13
CIB2	49.139	-1.06243	2.13982e-07	2.73749e-06
CIBAR1P1	59.281	-1.04323	5.79775e-07	6.72527e-06
CILP	1353.34	3.40424	1.3709e-24	2.31184e-22
CIP2A	351.143	-1.48478	0.00160519	0.00728916
CIT	782.524	-1.93229	9.30992e-10	1.97747e-08
CITED2	1315.2	3.18966	1.02684e-20	1.06314e-18
CITED4	29.33	3.38854	1.10004e-08	1.88651e-07
CKAP2L	73.7473	-2.24553	7.79047e-08	1.11164e-06
CKB	4198.62	2.58762	6.51813e-08	9.40335e-07
CKMT2	480.292	1.39077	1.53057e-07	2.03527e-06
CKS1BP7	16.8903	-1.61188	8.12331e-05	0.000543508
CKS2	198.443	-1.01147	0.016131	0.0495004
CLC	7.33945	-2.44789	0.00203545	0.00893669
CLCA4	6.25945	-2.63476	0.00523635	0.0195605
CLCNKA	24.8416	-3.93723	5.91041e-14	2.60526e-12
CLCNKB	9.24935	-3.05946	2.96735e-09	5.77893e-08
CLDN3	424.676	2.06852	6.03672e-17	4.05974e-15
CLDN34	4.74638	-1.89616	0.00125471	0.0059186
CLDN4	370.205	2.92444	3.64578e-09	6.9482e-08
CLDN7	294.706	1.47987	1.27816e-08	2.16364e-07
CLDN8	2.13618	3.90652	0.0013613	0.00634077
CLEC11A	113.513	-1.31899	0.00101984	0.00495345
CLEC17A	5.19595	-2.57594	0.00843685	0.0288885
CLEC2L	2.86916	-4.67943	1.11008e-05	9.37775e-05
CLEC3B	119.504	2.68142	3.45192e-13	1.34571e-11
CLEC4E	48.1036	2.59658	0.00243748	0.0103744
CLEC7A	40.9023	-1.15966	1.63339e-07	2.1591e-06
CLIC5	102.265	-1.24642	0.00490705	0.0185263
CLIC6	19.7734	-1.55862	0.00843603	0.0288885
CLPTM1L	51.6285	2.04148	0.00324666	0.0131664
CLRN1	9.62314	-2.35477	0.000303793	0.00172204
CLRN1-AS1	1.47279	-4.57755	0.0129941	0.0413034
CLSPN	522.055	-2.03635	0.0014362	0.00663411
CLTCL1	410.254	1.03047	1.13441e-07	1.54825e-06
CMYA5	922.535	1.33307	3.06213e-05	0.000231689
CNBD1	1.58055	-3.20026	0.00384006	0.0151479
CNDP2	7566.99	2.18457	4.01309e-61	9.9257e-58
CNGA1	87.9077	1.10343	0.00037177	0.00205963
CNIH3	8.79363	-1.97074	0.00116551	0.00554958
CNKSR1	1140.56	1.09528	5.29317e-07	6.20791e-06
CNKSR3	76.5462	1.90764	5.91074e-09	1.07319e-07
CNN1	84.109	-2.56712	8.24003e-06	7.18461e-05
CNNM1	19.1053	-2.34001	6.90195e-10	1.50477e-08
CNST	770.016	1.3052	5.96404e-13	2.25016e-11
CNTD1	12.7366	1.28662	0.00312004	0.0127318
CNTN1	1637.69	-3.32403	5.35349e-23	7.49489e-21
CNTN3	544.703	1.0513	0.000232593	0.00136935
CNTN4	590.88	-1.94845	8.93648e-08	1.25823e-06
CNTNAP2	3.25209	-4.28209	0.00171527	0.00771198
CNTNAP3	63.4477	-1.56904	0.00182114	0.00811419
CNTNAP3P2	15.2045	-1.64229	0.00560492	0.020708
COA3	260.691	1.12185	5.41695e-06	4.95607e-05
COA8	236.927	1.40318	0.000257573	0.00149273
COBL	1523.07	1.2949	8.15732e-08	1.16101e-06
COL11A1	145.212	-2.29291	0.00063815	0.00331124
COL12A1	7737.15	-2.28873	1.53239e-06	1.59771e-05
COL16A1	2075.05	-1.35476	2.88784e-05	0.000220073
COL17A1	754.27	2.98476	6.40841e-06	5.73818e-05
COL21A1	1107.49	-1.37327	0.0060339	0.022026
COL22A1	91.0522	-3.09512	2.8143e-10	6.67872e-09
COL24A1	464.352	-2.16717	2.78373e-13	1.10259e-11
COL25A1	396.149	2.417	1.16652e-07	1.58818e-06
COL26A1	45.4798	-1.31802	0.00695659	0.0246936
COL27A1	3568.25	-2.7232	2.68112e-44	2.19789e-41
COL2A1	11.9231	-2.6853	5.12509e-07	6.03621e-06
COL4A2-AS2	112.522	1.08248	0.000292476	0.0016668
COL4A3	153.329	1.11995	1.42946e-05	0.0001172
COL4A4	105.074	1.62088	8.03479e-05	0.000538614
COL4A6	326.84	2.34589	3.58114e-17	2.47566e-15
COL5A1	41028.4	-1.54952	5.8213e-24	9.12551e-22
COL5A1-AS1	39.5498	-1.6679	1.19888e-08	2.04185e-07
COL6A4P2	2.31235	-2.43911	0.00450347	0.0172751
COL6A5	3.24909	-5.71837	1.49395e-06	1.56201e-05
COL7A1	16367.6	-1.46837	1.26117e-07	1.70349e-06
COL8A2	21.5292	-1.1976	0.00170585	0.00767269
COL9A1	110.448	-3.39145	1.67861e-06	1.73391e-05
COL9A2	604.392	-1.6897	4.28957e-06	4.04087e-05
COLEC11	184.454	1.1209	0.00235013	0.010074
COLEC12	242.463	-1.483	5.60243e-06	5.10062e-05
COLGALT2	41.0898	-1.03798	8.60057e-05	0.000572173
COMP	130.864	4.32044	2.94439e-05	0.000223693
COPG2IT1	4.72168	-2.48464	0.000176079	0.00107062
CORIN	45.5447	1.75143	0.00339643	0.0136846
CORO2A	303.593	1.91013	2.05066e-15	1.1026e-13
CORO2B	377.468	1.03443	7.98295e-07	8.94766e-06
CORO6	84.3698	1.24598	6.11904e-05	0.000425257
COX16	18.3643	1.62501	2.49144e-05	0.000193508
COX17	75.8198	1.38829	1.82982e-06	1.87359e-05
CP	10968.5	2.68438	0.000947769	0.00464904
CPA3	30.7158	-3.65418	3.53429e-07	4.3394e-06
CPA6	12.6235	-2.91624	0.00132647	0.0062084
CPB2	36.9789	2.16536	0.00127349	0.00599575
CPE	304.886	-1.03714	0.000218524	0.00129428
CPEB2	262.673	1.56473	1.66978e-09	3.41316e-08
CPED1	1596.4	-1.54709	6.567e-08	9.46159e-07
CPM	2701.83	-2.03699	5.46339e-08	8.01681e-07
CPNE4	14.1975	3.46636	2.76838e-05	0.000212131
CPO	15.823	1.03012	0.0040101	0.015666
CPP	117.936	2.64424	8.61104e-05	0.000572441
CPQ	632.86	-1.13644	3.61269e-11	1.00649e-09
CPT1A	5108.48	2.15891	8.33735e-19	6.89923e-17
CPTP	103.149	1.09604	3.44757e-07	4.24698e-06
CPXM2	27.3333	-1.48566	0.00464589	0.0177146
CPZ	870.114	-2.15068	1.0041e-07	1.40133e-06
CR2	16.8689	-2.84432	0.000101982	0.000661261
CRABP2	1208.46	-2.69054	1.39749e-10	3.52299e-09
CRACR2B	97.825	1.26945	0.00987281	0.032939
CRB2	8.57381	1.52466	0.0111156	0.0362684
CRB3	180.818	1.09892	1.66781e-07	2.19547e-06
CREB3L1	3268.2	2.39197	5.35281e-08	7.86492e-07
CREB5	340.698	-1.498	1.83904e-05	0.000147044
CREG1	135.548	1.3812	2.8625e-05	0.000218441
CRIP1P4	46.7787	2.83513	2.60787e-16	1.62154e-14
CRIP2	1147.25	1.13775	5.10329e-10	1.15212e-08
CRISP1	2.81902	3.69783	0.000505657	0.00269409
CRISP2	85.0829	3.61051	6.12392e-10	1.35371e-08
CRISP3	3668	6.42821	1.01755e-16	6.6424e-15
CRISPLD1	386.411	-2.0969	3.38795e-09	6.50696e-08
CRTAC1	10.1887	-2.65609	0.00123464	0.00583877
CRTAM	13.949	-1.33362	0.000785511	0.00394261
CRYAB	1191.47	2.76472	1.10376e-11	3.34281e-10
CRYBB1	8.51772	-1.76937	0.00147503	0.00677551
CRYBB2	16.0601	1.52965	0.00463234	0.0176689
CRYBB3	47.5924	1.9155	9.78351e-05	0.000637159
CRYBG1	1117.15	1.06232	9.00351e-09	1.57068e-07
CRYBG2	37.5344	1.82833	0.00933292	0.0313918
CRYGN	6.6581	-1.91709	0.00342898	0.0137778
CSF2RB	133.976	-1.2993	3.39872e-05	0.000253537
CSMD3	79.8631	-6.19972	2.98625e-16	1.83525e-14
CSP2	9.51853	3.23364	0.000856455	0.0042502
CSRNP1	267.676	1.59028	2.35468e-08	3.74661e-07
CSRNP3	176.358	-1.26377	4.6953e-08	7.02224e-07
CST4	32.1984	1.63796	0.00123663	0.00584571
CST6	2.50513	-3.46608	0.0111652	0.0364105
CSTA	8.28963	-1.11865	0.0126774	0.0405109
CSTB	2939.23	1.19456	3.53062e-07	4.33729e-06
CTAGE11P	10.5355	-1.63773	3.48644e-05	0.000259385
CTAGE14P	151.667	-2.83981	1.5019e-08	2.50805e-07
CTAGE15	25.6998	1.94247	0.00828119	0.0284811
CTAGE8	9.64142	3.9541	0.00106272	0.00512715
CTAGE9	2570.51	5.82523	1.24436e-32	4.54089e-30
CTH	533.581	1.9196	3.33854e-43	2.32237e-40
CTLA4	6.49748	-2.14168	0.00140596	0.00652015
CTNNA2	1619.07	2.02231	5.21227e-05	0.000369978
CTNNA3	36.1278	1.13045	0.00625615	0.02267
CTSK	2724.42	-1.55682	2.23409e-12	7.60412e-11
CUBN	1695.51	-1.04895	4.69178e-05	0.0003381
CUX2	68.1994	-3.41736	1.07492e-08	1.84769e-07
CWH43	1126.99	3.06136	5.08094e-10	1.14941e-08
CXCL12	933.683	-2.38395	3.01588e-11	8.51949e-10
CXCL13	336.236	6.77751	6.39447e-12	2.01331e-10
CXCL14	370.49	6.70454	1.22317e-10	3.12603e-09
CXCL16	73.2131	-1.04547	0.00488257	0.0184558
CXCR2	14.9524	-2.08338	0.00214933	0.00934088
CXXC4	5.03493	-1.44341	0.00802047	0.0277617
CYB561	340.932	1.06322	7.2615e-15	3.62424e-13
CYB5A	2995.9	2.46039	6.15496e-15	3.09276e-13
CYB5B	581.256	1.18403	0.000101099	0.000656496
CYCSP10	9.20983	-1.33965	0.00472883	0.0179907
CYFIP2	705.645	-1.26946	5.40293e-07	6.32129e-06
CYGB	33.724	-2.28033	3.31629e-08	5.07707e-07
CYP11A1	128.584	1.09513	2.87103e-06	2.82508e-05
CYP24A1	69.9278	-2.66703	5.58515e-07	6.49558e-06
CYP26A1	559.685	8.42182	4.95658e-35	2.00606e-32
CYP2A6	69.5502	1.1044	0.001065	0.0051358
CYP2C18	14.3552	4.55735	1.42418e-06	1.4968e-05
CYP2C9	53.1408	3.07011	5.75104e-05	0.000403207
CYP2J2	385.41	1.86238	0.00083609	0.00416455
CYP2S1	45.3225	-1.60576	3.42566e-05	0.00025529
CYP3A43	4.94979	1.9608	0.00732522	0.0257417
CYP4A11	15.2549	4.02485	1.00476e-08	1.74462e-07
CYP4B1	523.442	6.27839	1.10802e-36	5.73594e-34
CYP4F11	204.195	1.793	0.00149476	0.00685768
CYP4F23P	2.93331	-5.58095	6.36677e-06	5.70549e-05
CYP4F8	4.15582	4.23108	0.00203163	0.00892463
CYP4Z1	17.4901	1.4672	0.000747882	0.00378532
CYP4Z2P	35.3872	6.78954	3.24962e-11	9.15651e-10
CYP8B1	11.425	1.7877	0.0079327	0.0274964
CYSLTR2	4.31721	-2.52356	0.00453828	0.0173757
DACH1	400.871	-2.10002	1.23437e-21	1.46154e-19
DACT2	96.8864	-2.46501	1.93668e-08	3.14217e-07
DACT3	78.1303	-1.10551	9.77036e-07	1.06821e-05
DANCR	3.79741	-1.97601	0.00318051	0.0129406
DAPK1	2771.19	1.43911	4.15565e-06	3.93135e-05
DAPK2	225.607	1.02322	0.000829063	0.00413695
DCDC2	654.032	-1.17665	9.06163e-05	0.000597665
DCHS1	3131.64	-1.08016	1.46692e-20	1.47088e-18
DCHS2	160.994	-2.9226	5.05196e-08	7.50712e-07
DCLK3	9.84417	-2.18373	6.50541e-05	0.000448885
DCST1	24.0577	1.49953	1.34486e-06	1.42082e-05
DCST2	74.4369	1.76849	2.217e-08	3.55038e-07
DCT	14.3259	3.57604	0.000223663	0.00132202
DCX	2.14826	-4.68992	0.00674754	0.0240783
DCXR	1290.85	1.59197	4.49453e-15	2.31593e-13
DDI1	8.71986	-3.49076	1.27376e-10	3.24415e-09
DDIT4	242.584	1.81195	1.71148e-06	1.76377e-05
DDIT4L	10.314	-3.0964	1.53889e-12	5.4031e-11
DDX11	1829.25	-1.12403	0.00391353	0.0153534
DDX52	278.716	2.00448	2.92157e-05	0.000222358
DEFB1	881.278	4.68974	6.05848e-08	8.80299e-07
DENND2A	1144.78	-1.08363	2.01937e-09	4.05696e-08
DENND2C	333.894	1.33881	4.87239e-05	0.000348968
DENND3	759.745	1.66096	2.25383e-11	6.51561e-10
DEPDC1P2	7.18545	-1.57172	0.00035041	0.00195101
DEPDC7	15.533	-1.36993	0.000550482	0.00290528
DEPP1	843.687	4.74997	2.61363e-09	5.15317e-08
DERA	800.267	1.31833	1.64685e-12	5.72793e-11
DES	93.6459	1.07738	0.0066673	0.0238422
DESI1	183.541	1.23775	1.65011e-08	2.73299e-07
DGAT2	17.9997	-1.73621	5.90086e-05	0.000412541
DGKB	552.149	2.49674	7.18268e-10	1.55835e-08
DGKD	1091.65	1.10313	2.10436e-08	3.38217e-07
DGUOK-AS1	8.55495	3.3993	1.60998e-06	1.67e-05
DHCR24	2897.14	1.49718	0.00021852	0.00129428
DHFR	182.24	-1.17491	0.000809331	0.00404938
DHFRP1	39.4719	-1.46892	1.18346e-07	1.61026e-06
DHRS7	1166.81	1.75953	8.58485e-07	9.54539e-06
DHRS9	5.94733	-2.394	0.000373192	0.00206494
DIAPH3	542.129	-1.782	0.00113362	0.00542675
DIPK1C	23.9285	5.69443	2.47205e-08	3.91657e-07
DISP2	13.1351	-1.31252	0.00991095	0.0330414
DISP3	12.886	-2.81628	2.54125e-10	6.08915e-09
DKK1	828.713	6.87625	4.54411e-50	5.95011e-47
DKK3	676.239	-2.10571	2.28865e-07	2.9095e-06
DKKL1	4.00132	-1.60148	0.0126748	0.0405109
DLC1	2113.81	-1.14105	1.44745e-13	5.95567e-12
DLGAP1	1393.72	3.60232	5.43896e-29	1.45869e-26
DLGAP3	37.9644	-1.24002	0.000386419	0.00212913
DLGAP5	425.007	-2.53719	5.39705e-08	7.92469e-07
DLL3	1.97229	-2.91111	0.00290005	0.0119724
DLX6-AS1	5.26021	-1.61443	0.00585896	0.0215038
DMBX1	2.86576	-5.07027	0.0126691	0.040502
DMKN	226.228	-1.10408	7.8373e-05	0.000527224
DMRTA1	96.6541	3.04768	5.97897e-16	3.49322e-14
DNAAF4	12.9179	-1.00765	0.00833393	0.0286286
DNAH5	2492.43	1.78156	0.0059447	0.0217539
DNAJB13	150.871	1.49187	0.000162329	0.000996261
DNAJB6P2	14.9996	2.08604	4.45675e-06	4.17715e-05
DNAJC15	1361.21	1.98336	8.98983e-12	2.764e-10
DNAJC22	185.276	-1.41303	4.94375e-05	0.000353624
DNAJC6	108.867	1.37481	0.00460892	0.0176038
DNASE1L3	27.032	-2.12286	4.01559e-06	3.81507e-05
DNASE2B	3.8282	3.51101	0.0026978	0.0113094
DNER	149.259	3.04818	0.00466924	0.0177914
DNM1	2463.59	-1.10427	1.0132e-07	1.40762e-06
DOCK3	41.0626	-1.30554	0.000475093	0.00255202
DPEP3	2.74662	-2.40054	0.00429064	0.0165988
DPP10	38.541	-6.06824	3.28924e-15	1.73916e-13
DPP6	765.096	-2.23621	1.57837e-19	1.42245e-17
DPY19L1	990.25	-1.28497	6.4686e-09	1.16215e-07
DPYSL3	425.733	-1.67638	4.11282e-05	0.00030007
DPYSL4	184.582	-1.74323	2.71369e-10	6.46753e-09
DRD2	29.0235	-2.83188	2.36707e-06	2.37134e-05
DRP2	39.9643	-2.40069	7.84691e-05	0.00052771
DSC2	1504.36	2.71335	1.72432e-08	2.82899e-07
DSCC1	92.0174	-1.10289	0.00215722	0.00936607
DSG2	2249.83	1.04132	3.56416e-06	3.41975e-05
DSP	13525.2	1.50532	1.22764e-10	3.13387e-09
DTL	299.55	-1.64646	0.00687695	0.0244616
DUOX1	8821.96	4.36773	1.43814e-28	3.72244e-26
DUOX2	449.461	2.67453	1.07873e-07	1.48788e-06
DUOXA1	2010.34	4.44704	7.60198e-33	2.86814e-30
DUOXA2	63.6138	2.99894	1.07864e-09	2.26942e-08
DUS4L-BCAP29	117.053	1.08126	8.63716e-10	1.84337e-08
DUSP1	2343.19	1.7855	0.00117792	0.00560028
DUSP15	63.6881	-1.05284	2.97083e-05	0.000225394
DUSP2	243.776	1.44718	0.00894932	0.0303492
DUSP23	147.573	1.99447	5.10734e-07	6.02168e-06
DUSP4	240.956	1.47841	8.60156e-05	0.000572173
DUSP5P1	7.3079	3.45094	6.26688e-05	0.000434717
DYNLT3	902.091	2.92365	1.51888e-11	4.47817e-10
DYNLT3P1	23.6208	3.28811	8.33579e-08	1.18037e-06
E2F2	30.1622	-2.48093	6.27607e-07	7.2013e-06
E2F7	117.527	-1.79247	0.00161061	0.00730931
E2F8	161.352	-2.43897	2.23939e-09	4.47075e-08
EBF1	1828.22	1.15466	2.30428e-05	0.000180848
EBF2	14.7306	6.08744	1.46092e-07	1.95081e-06
EBI3	3.09868	-2.34238	0.0033986	0.0136878
ECEL1	23.9764	-4.74137	1.12587e-08	1.92487e-07
ECEL1P1	2.10112	-5.07474	0.000579141	0.00303978
ECEL1P2	3.57148	-5.8491	1.8208e-06	1.86607e-05
ECHS1	2392.64	1.0716	0.000264609	0.00152754
ECI2	901.595	1.27552	0.0027692	0.011563
ECM1	7122.05	-1.44491	3.6273e-05	0.000268787
EDA	390.888	1.45888	1.85771e-24	3.04064e-22
EDAR	97.8594	-3.16383	2.95025e-08	4.57329e-07
EDN3	351.064	-1.82777	0.000189889	0.00114427
EEF1A1P6	87.9334	1.52328	0.00252263	0.0106716
EEF1GP1	3.98619	-1.90638	0.00325623	0.0131959
EEF1GP5	11.5273	4.62335	8.54522e-06	7.40598e-05
EEF1GP7	3.82125	-2.52811	0.00147399	0.00677212
EEF2K	1273.06	1.0411	8.77458e-12	2.70155e-10
EFCC1	29.3093	-1.49776	1.00961e-07	1.40462e-06
EFEMP1	1978.26	-1.47133	0.000198565	0.00119107
EFNA1	516.937	2.42153	2.49045e-07	3.14966e-06
EFNB1	431.008	-1.21222	3.72672e-07	4.5406e-06
EFNB3	69.7374	-1.23635	1.80111e-08	2.94151e-07
EGFEM1P	14.6374	-5.7936	3.3801e-13	1.32002e-11
EGFL6	138.867	-1.64562	1.32655e-05	0.000109774
EGFLAM	338.569	-1.05296	0.000103206	0.000668424
EGR2	76.3857	-1.0582	0.00683924	0.0243408
EGR3	35.6949	-1.43189	0.000923887	0.00454793
EHD3	126.182	-1.21096	1.58626e-09	3.25439e-08
EHF	2643.47	1.01278	1.14018e-05	9.59199e-05
EIF4BP2	6.16066	3.20116	0.00321579	0.0130576
EIF4E2P1	6.17889	2.23064	0.00531045	0.0197975
EIF5P1	6.0569	-1.44234	0.0117935	0.038141
ELAVL2	8.57055	-1.7966	0.010858	0.0355967
ELF2P1	1.49568	-2.66093	0.01046	0.0345561
ELFN1	204.07	-1.83777	1.37783e-05	0.000113511
ELK4	3866.58	1.20383	5.14196e-05	0.000365687
ELL2	411.003	2.03131	5.18554e-08	7.64944e-07
ELL2P1	13.778	1.86778	0.00605579	0.0220842
ELMO3	210.247	1.15298	1.20687e-09	2.53204e-08
ELMOD1	32.8793	-2.22053	1.40696e-08	2.35304e-07
ELN	10077.6	2.8081	3.85298e-47	4.08416e-44
ELOVL1	1265.28	1.15877	1.50422e-21	1.74396e-19
ELP3	11256.6	2.68259	2.91507e-20	2.87122e-18
EME1	123.755	-1.02079	0.0110293	0.0360569
EMILIN2	1700.28	1.51928	3.28442e-07	4.05272e-06
EMILIN3	270.699	1.43762	0.00116285	0.00554047
EML2	928.922	1.09589	6.01159e-11	1.61616e-09
EML6	111.065	-1.33017	6.81148e-09	1.21786e-07
EMX2OS	19.0218	-1.36309	1.20246e-05	0.000100514
ENC1	725.952	-2.7821	2.37286e-08	3.77285e-07
ENDOG	13.0623	2.67351	4.28192e-05	0.00031087
ENDOU	15.7201	1.5091	0.000529732	0.00280825
ENPP2	2367.5	-1.19086	6.47008e-06	5.78178e-05
ENPP3	32632	6.67374	2.43274e-43	1.74687e-40
ENSG00000175604	17.594	1.7158	0.0031166	0.0127271
ENSG00000176984	7.91467	-2.23179	0.00214877	0.00934028
ENSG00000177699	7.23841	-4.16007	2.08904e-07	2.68177e-06
ENSG00000197320	7.57444	-1.54752	0.0037804	0.0149497
ENSG00000204584	47.8788	1.4762	0.00477857	0.0181304
ENSG00000205018	58.6287	-1.89518	3.66585e-10	8.52685e-09
ENSG00000205414	3.01928	-3.94395	5.68465e-05	0.000399055
ENSG00000205644	2.16137	-2.48455	0.00385399	0.0151814
ENSG00000205890	5.20892	1.64669	0.00842004	0.0288443
ENSG00000205976	1.11847	-3.18583	0.0125358	0.0401449
ENSG00000212664	59.3708	-1.04609	1.90126e-09	3.83353e-08
ENSG00000213252	21.8155	-1.72768	1.69576e-07	2.22963e-06
ENSG00000213514	48.9745	2.31819	1.3562e-10	3.43448e-09
ENSG00000214147	13.9546	4.13917	2.2621e-06	2.27436e-05
ENSG00000214999	21.8037	5.56004	1.31969e-08	2.22252e-07
ENSG00000215380	5.81862	-3.53216	3.28015e-08	5.03212e-07
ENSG00000215381	2.33908	4.07477	0.00141143	0.00653869
ENSG00000215450	15.3121	-1.82966	0.000274042	0.00157627
ENSG00000218732	1.72923	-4.35612	0.000441396	0.00239529
ENSG00000223728	2.14886	3.85394	0.00366764	0.0145867
ENSG00000224675	1.35071	3.27726	0.0073912	0.0259385
ENSG00000225026	4.88488	1.93885	0.00649533	0.0233618
ENSG00000225057	6.15284	1.50972	0.00681446	0.0242665
ENSG00000225460	2.98015	-2.96956	0.00147327	0.00677022
ENSG00000227267	17.5486	-1.13981	0.00503074	0.0189291
ENSG00000228172	8.90325	1.53912	0.00873895	0.0297702
ENSG00000229060	10.7253	5.05891	4.84623e-07	5.74732e-06
ENSG00000230490	19.8448	-2.05	0.000163803	0.00100337
ENSG00000230563	5.48465	-3.36219	0.0015583	0.0071067
ENSG00000231043	25.0159	-1.93431	4.82418e-10	1.09578e-08
ENSG00000231362	3.09111	-2.60122	0.00354286	0.0141689
ENSG00000231881	1.30638	-3.45402	0.00442571	0.0170267
ENSG00000232153	5.35245	3.56706	0.00404387	0.0157813
ENSG00000233028	8.97799	1.24032	0.015969	0.0490846
ENSG00000233114	7.68218	-1.79201	0.00651969	0.0234267
ENSG00000233363	1.69633	-2.28993	0.0107328	0.0352585
ENSG00000233823	1.25977	-3.42882	0.00201353	0.00886144
ENSG00000233891	3.98448	-3.21281	4.59258e-05	0.000331488
ENSG00000234156	1.8741	3.09313	0.00815106	0.0281543
ENSG00000234424	2.40892	3.43233	0.00795403	0.0275575
ENSG00000234500	20.7732	1.64083	0.00234875	0.0100719
ENSG00000236478	16.0331	-1.41461	0.0111778	0.0364354
ENSG00000236740	3.93072	4.80137	0.000154278	0.000951291
ENSG00000236942	25.8752	2.033	5.98668e-05	0.000417623
ENSG00000239455	14.2704	1.85642	0.0157437	0.0485127
ENSG00000240207	7.26731	-1.89472	0.00138422	0.00643004
ENSG00000240776	10.4897	3.94481	0.000488004	0.00261066
ENSG00000241026	2.14314	3.85685	0.00233586	0.0100263
ENSG00000241207	8.84244	-1.36435	0.00624882	0.0226471
ENSG00000241612	213.22	2.86381	5.24061e-10	1.17953e-08
ENSG00000241889	207.941	3.86025	9.01839e-06	7.77195e-05
ENSG00000243979	6.01637	-1.46624	0.00247621	0.0105011
ENSG00000244604	13.9243	-1.0108	0.0051737	0.0193688
ENSG00000248288	2.15746	-4.23953	1.60216e-05	0.000129735
ENSG00000248515	7.03403	2.76497	0.00140717	0.00652441
ENSG00000248544	3.29295	-2.87962	0.000293416	0.00167087
ENSG00000249049	28.8628	-1.1857	0.00249434	0.0105699
ENSG00000249112	5.08967	-1.92341	0.000417344	0.00228145
ENSG00000249207	6.12739	-1.68288	0.00139917	0.00649002
ENSG00000249379	13.9819	-1.88398	8.07417e-06	7.05381e-05
ENSG00000250917	1.90593	3.10792	0.00674029	0.0240563
ENSG00000251288	14.5138	-1.09254	0.00737963	0.025902
ENSG00000253348	3.94779	3.5245	0.0014687	0.00675203
ENSG00000253509	7.13158	-1.89172	0.000517898	0.00275141
ENSG00000253966	19.384	1.58929	0.00356444	0.0142424
ENSG00000254287	1.83045	3.02748	0.0108581	0.0355967
ENSG00000254712	1.96836	-2.6577	0.00241454	0.0102961
ENSG00000254923	377.121	-1.17679	0.00200905	0.00884521
ENSG00000256006	7.82843	2.40924	0.00274395	0.0114662
ENSG00000257289	11.459	-2.20218	0.0129926	0.0413034
ENSG00000259175	1.83599	-3.09765	0.00205425	0.00900149
ENSG00000259275	9.5192	-1.7677	7.43686e-06	6.55362e-05
ENSG00000259342	4.27024	1.96502	0.0106111	0.0349619
ENSG00000259683	680.288	1.03567	0.00606242	0.0220942
ENSG00000259709	2.18298	3.95487	0.0023984	0.0102473
ENSG00000259972	3.54372	-1.87557	0.00617645	0.0224177
ENSG00000260211	1.93841	-3.55019	0.0011355	0.00543226
ENSG00000260668	5.34044	1.9103	0.0140819	0.0441622
ENSG00000260970	2.05568	3.8754	0.00095492	0.00467896
ENSG00000261722	2.05613	-2.49451	0.0143238	0.0448108
ENSG00000262580	15.045	1.06334	0.00500303	0.0188343
ENSG00000262769	2.80101	-4.17104	5.64369e-05	0.00039643
ENSG00000263427	7.62431	5.73001	0.000410526	0.00224971
ENSG00000265069	2.92443	-2.12986	0.0123589	0.0396524
ENSG00000265982	78.9548	1.18162	1.77725e-07	2.32033e-06
ENSG00000266365	5.23998	3.50366	0.00660331	0.023666
ENSG00000266401	2.80214	3.66512	0.000700954	0.00358613
ENSG00000266932	25.367	1.58374	0.00407183	0.0158793
ENSG00000266998	1.47004	-3.61089	0.000957183	0.00468798
ENSG00000267166	1.10814	-3.66307	0.0130234	0.0413731
ENSG00000267506	1.76505	-3.39827	0.00126201	0.00594926
ENSG00000267698	10.3057	-1.32292	0.00548508	0.0203295
ENSG00000267749	22.3581	-1.43243	8.96335e-06	7.73649e-05
ENSG00000267771	10.2044	-1.14145	0.00830432	0.0285357
ENSG00000267774	2.29195	-4.29408	0.000680327	0.0034999
ENSG00000268442	58.8134	-1.42001	2.93902e-06	2.88572e-05
ENSG00000268723	7.70548	-2.02265	0.00313284	0.0127737
ENSG00000269289	5.84292	-2.82559	9.81901e-05	0.000639097
ENSG00000269421	9.71609	-1.06608	0.006217	0.0225538
ENSG00000269534	5.68781	-1.96628	0.0111184	0.0362684
ENSG00000269934	11.012	-1.10622	0.00552285	0.0204353
ENSG00000270117	152.919	1.34457	1.69156e-12	5.86513e-11
ENSG00000270442	10.1034	-2.2821	1.31299e-08	2.21418e-07
ENSG00000270953	2.76313	-2.08718	0.0100355	0.0333719
ENSG00000271034	7.4072	3.94668	2.67669e-05	0.000206136
ENSG00000271155	4.44575	-2.04711	0.0137538	0.0433345
ENSG00000271426	4.844	1.98723	0.0061286	0.022282
ENSG00000271730	1.22916	-2.81749	0.0162079	0.0496815
ENSG00000271973	3.25327	2.17614	0.0115291	0.0374161
ENSG00000271976	2.59872	-2.64601	0.00185721	0.00824521
ENSG00000272027	8.28875	4.66651	0.000239791	0.00140393
ENSG00000272625	30.2983	1.75588	1.30485e-06	1.38117e-05
ENSG00000273329	4.06646	-2.64121	0.000136735	0.000854258
ENSG00000274322	2.34318	4.06029	0.000613566	0.00319859
ENSG00000274845	40.3408	1.72018	0.000675166	0.00347979
ENSG00000275888	7.86206	2.29152	9.80898e-05	0.000638631
ENSG00000276393	29.3603	-1.30847	0.000974799	0.00476483
ENSG00000277534	1.4574	-3.11803	0.00349883	0.0140205
ENSG00000279166	1.97648	-3.2057	0.00191063	0.00845373
ENSG00000279434	12.9528	2.0226	0.00159806	0.00726271
ENSG00000279555	1.99304	-2.44185	0.00538389	0.0200289
ENSG00000279713	8.01307	-1.17595	0.0127863	0.0407886
ENSG00000279933	13.6179	-1.90707	8.00399e-07	8.96673e-06
ENSG00000280071	11.4271	1.40537	0.00765042	0.0267009
ENSG00000280138	48.7871	2.01845	5.84292e-11	1.57271e-09
ENSG00000281383	15.2383	-1.3458	0.00167108	0.00753765
ENSG00000281732	12.9626	1.9005	0.00127175	0.0059888
ENSG00000283674	12.168	-1.18291	0.00120951	0.00573333
ENSG00000284874	29.6848	1.46274	9.48091e-05	0.000621825
ENSG00000285751	1.61244	-3.31708	0.00161843	0.00734179
ENSG00000285756	831.006	1.1091	9.94886e-05	0.00064717
ENSG00000285781	297.659	1.42055	7.09574e-10	1.54099e-08
ENSG00000285881	2.40382	-2.96859	0.00105006	0.00507476
ENSG00000285943	1.88374	-2.54025	0.00978007	0.0326785
ENSG00000286058	1.8713	-3.62903	0.003815	0.0150719
ENSG00000286379	2.08074	-3.04126	0.000881238	0.00435725
ENSG00000286389	1.18574	-3.31312	0.00656459	0.0235462
ENSG00000286456	1.73524	-3.81184	0.0084787	0.0290161
ENSG00000286502	62.9508	-2.03188	3.58139e-11	9.9902e-10
ENSG00000286581	4.5022	3.76886	0.00247373	0.0104966
ENSG00000286672	1.17623	-3.75079	0.00177393	0.00794039
ENSG00000287134	2.53313	-3.64672	0.000147885	0.000914521
ENSG00000287691	5.66504	3.10415	0.000331417	0.0018586
ENSG00000287724	9.91032	1.57265	0.0113163	0.0368329
ENSG00000287929	5.44831	-3.00674	1.53554e-06	1.60024e-05
ENSG00000288542	29.8624	3.04956	6.52135e-10	1.42739e-08
ENSG00000290032	10.5231	1.12912	0.00889446	0.0302045
ENSG00000290688	1.86913	3.06002	0.0115897	0.0375856
ENSG00000290998	7.46947	-6.05478	1.19908e-05	0.000100306
ENSG00000291105	15.6601	4.28155	5.95258e-05	0.000415766
ENSG00000291130	10.5312	-1.19416	0.00232839	0.01
ENSG00000291133	1.15027	-3.24142	0.0154541	0.0477524
ENSG00000291166	9.62138	2.15052	0.00282011	0.0117228
ENSG00000291186	30.8406	-1.08876	9.50268e-05	0.000622442
ENTPD1	575.215	-1.21922	8.09208e-07	9.0472e-06
ENTPD3	1455.35	3.32919	5.47669e-18	4.09098e-16
ENTPD3-AS1	4.89358	2.12832	0.00433252	0.0167405
ENTPD5	733.981	1.3772	3.89048e-10	9.01166e-09
ENTPD8	41.3527	2.41837	2.30455e-09	4.5926e-08
EOLA1	112.861	1.1432	2.62112e-05	0.00020238
EPB41L4B	406.936	1.78487	7.09511e-14	3.0787e-12
EPHA2	882.431	-1.14052	0.000185683	0.00112135
EPHA4	206.863	1.03381	1.56982e-06	1.63291e-05
EPHA5	219.409	-2.38158	0.000131739	0.000828159
EPHA7	466.206	-1.73821	0.00212364	0.00925453
EPHB2	316.021	-3.03206	1.73653e-30	5.22367e-28
EPHX2	518.065	-1.02594	1.92966e-07	2.49589e-06
EPS8L2	920.103	1.52151	3.14827e-09	6.09395e-08
EPS8L3	38.3755	1.71558	0.000805544	0.00403497
EPYC	10.9516	-3.80149	1.53326e-08	2.55658e-07
ERBB3	8283.3	1.59701	5.45181e-06	4.97978e-05
ERC2	42.773	-1.53999	7.46222e-07	8.41485e-06
ERCC6L	107.614	-1.0922	2.09051e-07	2.68212e-06
ERICH3	254.07	-1.28489	0.00393446	0.0154246
ERICH4	6.29439	-2.99853	0.000261903	0.00151388
ERMN	12.0724	-3.05424	2.68326e-05	0.000206533
ERN2	219.207	2.33508	0.000236815	0.00139016
ERRFI1	5732.57	2.90105	5.4421e-13	2.06726e-11
ERVE-1	2.52618	3.48291	0.00209611	0.00915429
ESCO2	164.162	-3.00283	1.08958e-07	1.49901e-06
ESPL1	248.651	-2.0138	7.02105e-09	1.25031e-07
ESR1	11260.6	-1.7598	2.59924e-05	0.00020083
ESRP2	575.659	1.33687	2.00561e-18	1.57755e-16
ESRRG	68.5375	-1.20496	0.000130562	0.000821456
ESYT3	201.702	1.05432	4.91428e-05	0.000351742
ETNPPL	26.2873	-4.74243	5.35966e-15	2.71768e-13
ETV1	790.319	-2.09876	1.53074e-06	1.59746e-05
ETV4	51.5104	-1.30647	0.000140114	0.000872677
ETV5	457.795	-1.21952	2.08467e-05	0.000164673
EVA1C	558.025	2.29108	3.31985e-23	4.76773e-21
EVI2B	170.456	-1.04555	4.11841e-11	1.14025e-09
EXO1	228.345	-2.38325	0.000173483	0.00105526
EXOSC3P1	60.7694	1.20554	0.0115667	0.0375165
EXTL1	62.7379	1.25775	0.00170189	0.00765644
EYA2	2006.91	-1.06567	1.30314e-07	1.75381e-06
EYA4	45.1598	-2.46964	4.06089e-07	4.91279e-06
EYS	30.0713	1.48651	0.000186561	0.00112604
EZH1	1529.46	1.26509	2.27355e-14	1.06546e-12
EZR	7395.28	1.5075	4.63515e-06	4.32796e-05
F11	4.43035	2.287	0.0143311	0.0448219
F13A1	1790.08	-2.12985	5.40577e-09	9.91206e-08
F2	51.252	2.69689	6.06033e-07	6.99342e-06
F2RL1	404.35	1.67821	2.83286e-08	4.41902e-07
F5	93.7799	-2.25133	2.90104e-08	4.50644e-07
FAAH2	457.736	1.48437	4.50138e-18	3.40819e-16
FABP5	258.008	1.52014	2.12044e-07	2.71582e-06
FABP5P3	3.78589	-2.02678	0.0036908	0.0146605
FAHD2P1	6.63304	4.33136	0.00533586	0.0198822
FAIM	184.968	1.13864	5.85824e-09	1.06453e-07
FAIM2	29.2731	-1.79024	1.14214e-06	1.22525e-05
FAM107A	21.5968	1.8346	0.00018665	0.00112627
FAM107B	520.262	1.06249	1.08269e-07	1.49045e-06
FAM110C	147.6	4.76348	7.07316e-30	2.04479e-27
FAM111B	181.235	-2.57893	2.39416e-09	4.76265e-08
FAM133A	1.63542	-3.8327	0.000588997	0.0030848
FAM133CP	35.7643	-1.18252	0.00656245	0.0235423
FAM133FP	22.1805	-1.45328	4.8117e-06	4.47217e-05
FAM13A	2656.57	2.47927	3.31721e-12	1.09719e-10
FAM13B-AS1	3.04706	-2.89172	0.00579749	0.0213028
FAM149A	812.344	2.39834	6.54613e-16	3.81458e-14
FAM151A	25.7146	1.32525	0.000876577	0.0043371
FAM166A	36.5969	1.91894	0.00194504	0.00858889
FAM177A1	1588.41	2.42175	8.38547e-45	7.17925e-42
FAM177B	12.0921	5.22681	6.61754e-05	0.000455493
FAM180A	2.79018	-2.39877	0.0033264	0.0134384
FAM184A	82.97	-1.36949	1.24143e-06	1.32144e-05
FAM222A	30.4907	-3.36697	1.79403e-11	5.23397e-10
FAM241A	17.2302	1.02682	0.00584482	0.021459
FAM27C	2.59988	-2.45323	0.00333858	0.0134827
FAM3C	836.413	1.01975	0.000102352	0.000663468
FAM3C2P	197.44	1.06046	0.000275056	0.00158129
FAM47A	1.91385	-3.56536	0.000927028	0.00456136
FAM72A	48.067	-1.36259	0.0039746	0.0155519
FAM72B	45.7965	-1.34659	0.00203396	0.00893192
FAM78B	18.7314	-1.6205	7.64798e-06	6.71574e-05
FAM83B	45.9921	1.3636	0.00609968	0.0221973
FAM83C	5.6712	3.1918	0.00516962	0.0193567
FAM83E	139.078	1.95934	7.51722e-07	8.46829e-06
FAM86GP	44.6243	-1.53259	1.72757e-07	2.26344e-06
FAM86JP	109.358	-1.0895	4.73501e-05	0.000340324
FAM89A	7.21126	2.13987	0.00076533	0.0038589
FAM8A6P	3.61888	4.66795	0.000347257	0.00193539
FAM90A20P	268.032	-1.15096	0.00115618	0.00551669
FANCA	966.368	-1.82914	7.90756e-08	1.12762e-06
FANCB	158.567	-1.37117	0.000126826	0.000801971
FANCD2	1442.96	-1.80767	3.06019e-10	7.23141e-09
FANCD2OS	2.20418	-2.29855	0.0133429	0.0422373
FANCI	1841.87	-1.74809	5.30703e-07	6.21761e-06
FAT2	282.176	-1.68827	0.000681386	0.00350373
FAT3	23.7523	-1.42694	0.00340849	0.0137217
FAXC	20.6291	-1.08857	0.000304463	0.00172496
FBLN5	2747.78	-1.34634	4.62539e-08	6.93809e-07
FBN2	2783.86	-3.00214	2.8985e-25	5.4219e-23
FBN3	127.072	-2.53823	0.00563009	0.0207906
FBXL16	16.1022	1.99958	4.80938e-06	4.47188e-05
FBXL22	9.17487	-1.46008	0.000104609	0.000676524
FBXL8	67.9321	1.20606	4.80432e-06	4.46904e-05
FBXO32	408.485	1.98964	3.1458e-06	3.06055e-05
FBXO43	21.112	-1.6842	0.00582202	0.0213788
FCGR2B	32.5578	-1.30898	0.00879028	0.0298963
FCGR3B	64.501	-2.88314	0.000291431	0.0016617
FCHO2	1578.05	1.05677	3.73329e-19	3.20861e-17
FCRL1	4.00659	-2.81896	0.00934311	0.0314213
FCRL6	39.3108	-1.16639	0.0021325	0.00928409
FETUB	25.1263	5.81905	1.71298e-07	2.24697e-06
FGB	19.1997	3.26348	0.00134378	0.00627889
FGD2	59.024	-1.5009	3.46089e-08	5.27667e-07
FGD3	75.0217	-1.33645	4.87152e-07	5.77116e-06
FGD4	2120.99	2.02824	1.76231e-18	1.40103e-16
FGF1	17.5944	-3.02279	3.3701e-05	0.000251739
FGF10	475.327	1.36872	2.6951e-06	2.66873e-05
FGF12	57.5177	-1.56579	0.000159441	0.00098016
FGF14	18.8371	2.27374	0.00069698	0.00356825
FGF20	1.58768	-4.16853	0.00141407	0.00654589
FGF7	62.6578	1.43669	0.00131081	0.00614647
FGG	3.60759	4.67322	0.00271402	0.0113667
FGL1	189.694	2.76347	1.777e-08	2.9066e-07
FHDC1	239.527	2.15272	2.27581e-10	5.50049e-09
FHL2	469.056	-1.02528	0.0108828	0.0356565
FHL5	3.89575	-2.26173	0.0105743	0.0348613
FHOD3	541.037	-3.33723	1.17481e-19	1.06306e-17
FIGN	31.4244	-1.8233	0.000109201	0.000702547
FJX1	389.686	-3.04826	1.82678e-12	6.27531e-11
FKBP5	3679.09	4.38018	6.72632e-31	2.05107e-28
FLNC	2292.68	-1.29726	0.000123018	0.000780867
FLRT1	103.545	-2.61823	1.41206e-22	1.84896e-20
FLRT3	56.9671	-1.93536	3.8446e-12	1.26225e-10
FLT1P1	8.61528	-1.26852	0.0107678	0.0353475
FLVCR2	357.542	2.0119	1.10458e-12	3.97862e-11
FMN1	213.452	-1.31105	2.09119e-09	4.19368e-08
FMN2	57.7811	-1.01849	0.00286543	0.0118703
FMO1	23.4816	-5.76687	1.70766e-09	3.4842e-08
FMO2	1.90563	-2.58441	0.00890326	0.0302252
FMO3	17.5671	-1.92868	0.000201746	0.00120787
FMO5	302.563	2.03592	4.14871e-17	2.84155e-15
FMO6P	3.44032	-3.08483	0.0015461	0.0070617
FMOD	534.537	-2.1161	7.96963e-11	2.10944e-09
FNDC1	1061.74	-2.13985	0.000784924	0.00394055
FNDC10	7.93024	1.83027	0.00530746	0.0197896
FNTAP1	33.7097	1.03092	9.3975e-05	0.000617075
FOLH1	244	-1.3851	0.000147023	0.000910106
FOLR1	346.306	1.67221	0.000274014	0.00157627
FOSL2	1383.71	1.48348	5.4852e-05	0.000386639
FOXB2	22.6531	4.98941	1.51804e-06	1.58571e-05
FOXC1	67.9888	-1.60927	9.43018e-05	0.000618856
FOXH1	3.66643	2.07542	0.00642412	0.023173
FOXL2	992.05	-1.58304	3.34093e-21	3.73462e-19
FOXL2NB	336.795	-1.49475	4.03905e-16	2.41691e-14
FOXM1	358.162	-1.58782	0.0122644	0.0394176
FOXN1	5.26755	4.01189	0.000714539	0.00364057
FOXN4	6.22682	-2.72101	0.00246745	0.0104739
FOXO1	54.2766	1.51178	2.55714e-08	4.03702e-07
FOXO6	11.6617	-1.3575	0.000530274	0.00281045
FOXS1	31.103	-1.45684	0.00212177	0.00924822
FPR1	25.9391	-1.62332	0.0103794	0.0343511
FRAT1	21.3605	1.27563	3.23882e-05	0.000243568
FRAT2	19.0415	1.84034	4.06221e-05	0.000297157
FREM1	4622.8	-2.91153	4.38057e-32	1.4554e-29
FREM2	13029.7	1.96569	5.59144e-07	6.4989e-06
FRK	238.283	1.41331	0.00013624	0.00085188
FRMD5	14.9354	-1.58339	1.613e-05	0.00013047
FRMPD1	14.7663	2.72277	0.000367118	0.00203741
FRMPD4	16.7987	-2.53473	0.00107391	0.00517431
FRRS1L	32.8377	-2.31502	8.84481e-05	0.000585794
FRY	1469.11	-1.14356	0.000128944	0.000812651
FRZB	71.8772	-1.09205	0.00196612	0.00867167
FSBP	22.4473	1.56219	0.00277648	0.0115847
FSCB	4.91866	-3.13049	7.64955e-05	0.00051584
FSD1L	387.794	1.0571	6.26521e-10	1.37674e-08
FST	14.9672	1.83308	0.00573013	0.021097
FTH1	4081.51	1.94707	6.52668e-20	6.20871e-18
FTH1P11	6.46308	2.02662	0.000754193	0.0038138
FTH1P12	10.4972	2.47628	2.69075e-06	2.6656e-05
FTH1P2	36.4395	1.79134	2.2605e-06	2.27378e-05
FTH1P20	66.8805	1.68909	5.74655e-09	1.04679e-07
FTH1P8	63.6034	1.7844	3.33111e-10	7.81355e-09
FUT2	510.195	1.68581	1.11777e-08	1.91249e-07
FUT8	829.316	-1.19451	4.18267e-25	7.56961e-23
FUT9	12.9934	-2.11659	2.78211e-05	0.000213036
FXYD3	5.71661	3.60925	0.00242618	0.0103323
FXYD4	68.2307	3.76594	5.90547e-06	5.33722e-05
FYB1	448.822	-1.1082	2.81426e-06	2.77438e-05
FYB2	207.796	-1.19432	0.000730498	0.00370865
FZD10	47.7059	-1.47179	2.65466e-09	5.22481e-08
FZD10-AS1	2.32139	-2.76531	0.00371604	0.0147371
FZD2	464.2	-1.29206	1.21153e-08	2.05868e-07
FZD9	5.29762	2.68636	0.0129505	0.0412003
G0S2	29.3873	1.92037	5.30667e-05	0.000375601
GABARAPL1	1690.33	2.61206	4.99933e-10	1.13325e-08
GABRA2	74.1678	2.60235	0.00241419	0.0102961
GABRA5	1.9715	-3.36044	0.00107621	0.00518203
GABRB3	150.113	-1.50457	7.91906e-12	2.45855e-10
GABRG3	10.8834	-2.40556	0.000159116	0.00097843
GABRP	16978.8	2.71813	4.14998e-62	1.31969e-58
GABRQ	82.7032	-3.4144	9.65125e-07	1.05831e-05
GADD45A	181.851	1.26661	0.00164261	0.0074303
GADD45B	208.284	1.62562	2.7055e-05	0.000207814
GAL	251.688	6.33664	5.5449e-18	4.12808e-16
GALNT12	299.474	-1.23081	0.0154143	0.0476693
GALNT13	234.832	2.46112	6.33045e-08	9.16823e-07
GALNT14	12.367	-3.96429	5.93007e-10	1.32003e-08
GALNT15	53.419	3.16153	9.2599e-06	7.96159e-05
GALNT16	20.5749	-1.77248	2.05856e-08	3.32055e-07
GALNT17	357.072	-1.03414	0.010372	0.0343317
GALNT5	30.8545	-4.58919	3.11215e-07	3.86156e-06
GALR1	2.18987	3.96588	0.00369535	0.0146759
GAMT	61.7546	-1.30236	1.72941e-06	1.77978e-05
GAPDHP44	78.6055	2.0307	2.97235e-05	0.000225433
GAPDHP69	2.56993	-5.39374	0.000257343	0.00149179
GAPDHP71	11.7921	-5.9456	8.5385e-11	2.24666e-09
GARIN1A	91.8127	1.22721	1.40993e-09	2.91683e-08
GARIN1B	8.01441	1.96385	0.00165701	0.00748175
GARNL3	2514.36	1.82835	3.8659e-13	1.49921e-11
GAS2L3	142.748	-1.43825	0.00719719	0.0253777
GASK1A	250.364	1.34748	3.35502e-09	6.46045e-08
GAST	44.0135	8.26657	7.19608e-06	6.36664e-05
GATA6	48.8345	2.02885	1.72845e-05	0.000139
GATM	92.7089	-1.21659	1.31524e-07	1.76846e-06
GBGT1	9.39573	-1.32488	0.0107384	0.0352717
GBP1P1	46.8425	1.60852	0.00644652	0.0232275
GBP2	5931.17	2.27688	4.99656e-07	5.90044e-06
GCKR	41.6467	2.05212	0.000685625	0.00352065
GCLC	3739.65	-1.88998	1.81468e-14	8.57637e-13
GCLM	270.238	1.16078	1.27651e-17	9.25573e-16
GCNT1	264.616	-1.25938	6.7804e-14	2.95365e-12
GCNT2	801.429	1.27514	8.06081e-10	1.73534e-08
GCNT3	526.113	4.51911	1.6385e-25	3.17156e-23
GCNT4	342.744	3.63322	1.48194e-21	1.72711e-19
GCOM1	24.22	2.25878	7.9378e-05	0.000532857
GDF15	58.1615	1.83596	0.00397872	0.0155652
GDF9	15.6681	1.04901	0.00598193	0.0218728
GDNF	5.36423	-3.74498	0.000331475	0.0018586
GDPD1	48.858	-1.43193	8.46222e-13	3.11392e-11
GFRA2	31.449	-4.27597	1.39983e-10	3.5249e-09
GGTA1	156.774	1.32779	0.00980032	0.0327364
GHSR	12.5319	2.74941	0.00191883	0.00847988
GINS1	119.712	-1.68436	0.000579903	0.00304305
GINS4	45.5842	-1.64056	6.95097e-05	0.000475065
GJA1	12531.2	-1.82531	1.36154e-36	6.58867e-34
GJA4	144.75	-2.68537	7.01491e-17	4.68925e-15
GJB1	901.063	3.075	2.83745e-38	1.54053e-35
GJB2	306.916	2.24793	0.011509	0.0373564
GJB3	134.332	-1.16892	0.000145049	0.000900136
GJB6	94.0423	2.18244	0.00348936	0.0139926
GK5	763.328	1.10163	1.38072e-06	1.45456e-05
GLA	884.951	-1.17108	2.2282e-06	2.24637e-05
GLDN	6.78376	-4.34302	3.50434e-07	4.30738e-06
GLI1	428.6	-2.65673	2.73262e-07	3.43662e-06
GLIPR1	820.583	-1.44537	2.01747e-07	2.59739e-06
GLIPR1L1	17.8724	-1.27994	4.43538e-05	0.000320661
GLIS1	11.7978	-3.5945	4.76688e-05	0.000342293
GLIS3-AS1	6.3304	1.49814	0.0064506	0.0232384
GLP1R	1.37514	-4.02571	0.0144177	0.0450376
GLRB	236.763	-1.40629	1.19474e-07	1.62361e-06
GLRX	405.366	1.78441	6.25544e-07	7.185e-06
GLRXP2	3.12503	3.78498	0.00309651	0.012673
GLRXP3	5.15349	3.96957	0.00351843	0.0140889
GLT1D1	113.245	-1.11846	0.0040955	0.0159576
GLT8D2	152.336	-2.27678	4.96672e-26	1.0237e-23
GLYATL1	6.39668	-2.61834	1.30073e-05	0.000107877
GLYATL3	74.2706	9.02023	6.32408e-10	1.38694e-08
GMDS-DT	8.38985	-1.26958	0.00213686	0.0092994
GMNN	654.795	1.51861	2.70425e-08	4.23812e-07
GMPR	1122.21	2.96635	8.2483e-27	1.81789e-24
GNAO1	88.233	-1.35593	9.04091e-05	0.000596652
GNB5	888.29	1.27947	1.29468e-07	1.74347e-06
GNG11	105.434	1.9868	2.3922e-11	6.87989e-10
GNG2	48.7144	-2.10021	3.62453e-14	1.65332e-12
GNG8	3.17647	-1.71736	0.00950519	0.0318797
GNL3LP1	18.683	-1.08735	0.000629051	0.00326631
GOLGA6GP	1.31935	-3.04311	0.0162351	0.0497512
GOLGA7B	3.28672	-2.75974	0.0147325	0.0458538
GOLGA8J	13.1343	-5.25564	4.8355e-06	4.49054e-05
GOLGA8K	61.0835	1.23039	0.00939718	0.0315745
GOLGA8O	72.8115	-2.45003	0.000675007	0.00347977
GOLGA8T	23.9785	-2.93593	0.00693108	0.0246188
GOLIM4	2518.12	-1.04868	7.89061e-11	2.09101e-09
GOLPH3	1355.24	1.16117	8.22833e-09	1.44678e-07
GOLT1A	10.4136	-1.94363	0.000260625	0.00150845
GP2	111.345	5.3652	1.60846e-06	1.6694e-05
GPAT3	81.5271	-3.59956	4.56002e-46	4.06024e-43
GPBAR1	173.316	2.86799	1.23159e-18	1.00791e-16
GPC2	40.4794	-1.78322	9.56577e-06	8.19292e-05
GPC3	28.2968	-1.67192	5.39012e-05	0.000381127
GPC5	2.46816	3.48301	0.00911245	0.0307898
GPER1	17.9439	-1.21331	0.00027796	0.00159592
GPLD1	63.158	-1.71766	4.61711e-11	1.26261e-09
GPR132	59.9582	-1.2215	4.12775e-05	0.00030106
GPR137C	76.9307	-1.56278	2.15679e-10	5.22986e-09
GPR141	8.58092	-2.30078	0.00144344	0.00665928
GPR143	72.7616	-1.24405	2.94017e-06	2.88572e-05
GPR157	147.912	1.89393	7.40298e-14	3.19361e-12
GPR15LG	14.5388	3.65061	1.48156e-06	1.55052e-05
GPR171	21.905	-1.19394	0.00236331	0.0101226
GPR176	27.6052	-1.40671	8.9142e-09	1.55754e-07
GPR31	1.21543	-3.30615	0.0087743	0.0298557
GPR37	67.4712	2.52439	1.36756e-06	1.44138e-05
GPR37L1	8.79172	-1.63419	0.00224931	0.00970906
GPR63	19.2868	-1.58105	0.000410919	0.00225131
GPRC6A	2.70305	-3.50784	0.00791728	0.0274601
GPT2	1490.02	2.23315	2.21824e-31	7.15624e-29
GPX1	185.919	1.374	5.58003e-06	5.0823e-05
GPX2	47.9811	1.23376	0.000407698	0.00223476
GRAMD1C	1040.47	3.07697	6.99058e-09	1.24588e-07
GRB14	44.4696	-2.66509	3.75665e-07	4.57457e-06
GRB7	533.854	2.36255	7.97879e-07	8.9475e-06
GREB1L	591.546	1.40195	1.26331e-11	3.79503e-10
GRHL1	212.863	1.78414	4.03003e-07	4.88077e-06
GRIA1	240.04	3.87314	6.16626e-39	3.70975e-36
GRID1	99.8131	-1.29291	2.47169e-06	2.46616e-05
GRID2	11.7777	-2.30419	5.19412e-06	4.78565e-05
GRIK4	8.80143	-3.30163	4.51597e-06	4.22376e-05
GRIK5	98.0855	-2.12978	3.1135e-05	0.000234858
GRIN1	55.2918	3.31691	3.67309e-05	0.000271888
GRIN3A	57.0063	-1.10582	0.00164804	0.00744728
GRM2	15.6447	-1.16915	0.0144695	0.0451549
GRM8	8.75612	-4.76721	1.88141e-06	1.92199e-05
GSDMA	9.36303	-3.34346	0.000265605	0.00153249
GSDMC	19.5263	3.63024	0.00021217	0.00126149
GSN	22098.8	1.34494	1.78541e-06	1.83318e-05
GSTA1	24.0083	-3.48979	0.000427228	0.00232977
GSTM5	584.176	-1.26829	3.48608e-06	3.35206e-05
GSTT2B	25.1913	1.86339	0.000782487	0.0039292
GTSE1	165.995	-2.59639	3.60621e-09	6.87869e-08
GUCY1A2	745.019	-2.19373	6.90885e-16	3.98422e-14
GUCY2D	4.24265	-1.58783	0.016271	0.0498268
GVQW3	14.1037	-1.2741	0.000595172	0.00311071
H1-5	1435.73	-2.34958	7.19994e-09	1.27807e-07
H2AC11	2341.72	-1.76614	1.40399e-05	0.000115324
H2AC12	1570.27	-2.03169	4.41562e-06	4.14383e-05
H2AC13	1121.14	-2.12051	6.41846e-06	5.74256e-05
H2AC14	1065.38	-2.38208	4.79725e-10	1.09136e-08
H2AC15	649.271	-1.50091	2.85644e-05	0.000218203
H2AC16	1231.85	-2.38716	2.99616e-09	5.82994e-08
H2AC17	1946.33	-1.74518	1.51756e-05	0.000123559
H2AC21	145.607	-1.78785	1.44211e-09	2.98062e-08
H2AC4	227.233	-2.14879	1.65636e-09	3.38883e-08
H2AC5P	7.363	-1.76336	0.00188371	0.00835285
H2AC8	2454.81	-1.79359	8.9045e-11	2.33193e-09
H2AX	582.392	-1.26937	0.00134953	0.00629914
H2BC10	1408.83	-1.76302	0.000528244	0.00280303
H2BC11	1230.62	-1.54712	1.98355e-05	0.000157467
H2BC13	1366.96	-2.30708	1.01714e-09	2.1502e-08
H2BC14	975.94	-2.13536	3.74278e-06	3.5788e-05
H2BC15	1533.44	-1.63434	5.3938e-06	4.93693e-05
H2BC17	792.474	-1.91374	0.000556889	0.00293474
H2BC18	1995.51	-1.41924	4.65915e-05	0.000335971
H2BC26	99.6052	-1.4868	2.91063e-05	0.000221734
H2BC3	403.16	-2.36045	2.4903e-10	5.97995e-09
H2BC4	3816.85	-1.01286	7.69538e-09	1.35844e-07
H2BC5	3605.07	-1.25112	1.29703e-06	1.3742e-05
H2BC6	1685.82	-1.81181	0.000133663	0.000838626
H2BC7	1960.74	-2.1183	2.93307e-07	3.66376e-06
H2BC8	1401.46	-1.40989	5.41816e-07	6.33447e-06
H2BC9	2343.91	-2.05057	6.41174e-09	1.15287e-07
H3C1	561.225	-1.95217	2.71883e-09	5.33697e-08
H3C10	742.901	-1.88905	1.68259e-08	2.7744e-07
H3C11	665.139	-1.28325	0.0010969	0.00526797
H3C12	161.498	-2.00013	0.000384733	0.00212089
H3C13	160.219	-1.50097	0.00388501	0.0152684
H3C2	1268.63	-2.44021	4.65384e-09	8.65451e-08
H3C3	1270.72	-2.09355	0.00019794	0.0011886
H3C7	1930.79	-2.16668	2.63908e-09	5.19876e-08
H3C8	881.01	-2.61848	2.31338e-08	3.68353e-07
H4C1	281.912	-2.19631	1.71617e-08	2.82057e-07
H4C11	77.14	-1.0611	3.5829e-06	3.43477e-05
H4C12	111.601	-1.17556	3.46205e-05	0.000257657
H4C4	718.032	-1.29638	2.53276e-11	7.25603e-10
H4C9	249.006	-1.30693	0.00218339	0.00946676
HAGH	517.789	1.05478	1.17725e-13	4.9074e-12
HAL	1284.48	4.63485	4.37884e-14	1.98116e-12
HAND2	1158.42	1.62775	6.42287e-12	2.01939e-10
HAP1	934.272	5.58956	1.93426e-08	3.14053e-07
HASPIN	37.8351	-2.10061	1.13158e-07	1.54628e-06
HBB	16779	-3.54377	2.0573e-08	3.32055e-07
HBD	6.22403	-4.83419	0.000108766	0.000700156
HBE1	6.49685	2.72657	0.0133239	0.0422071
HBEGF	57.2353	1.29423	0.00019783	0.00118826
HBG2	9.92556	-3.21701	2.88674e-05	0.000220065
HCN1	203.444	-4.15333	8.96527e-22	1.07294e-19
HDC	15.9849	-3.15838	8.39447e-06	7.29641e-05
HEATR4	61.7742	1.05604	0.000422827	0.00230972
HEBP2	700.966	1.06413	4.01943e-19	3.42806e-17
HECW1	266.147	1.24233	0.000189968	0.00114444
HELLS	617.824	-1.84374	1.25128e-07	1.69219e-06
HELZ	9667	1.09473	0.000469814	0.00252799
HEMGN	22.1818	-3.55088	2.25486e-13	9.06013e-12
HEPACAM2	2.62516	4.18992	0.000625366	0.00325021
HERC5	180.329	-1.56354	8.28706e-06	7.22279e-05
HERPUD1	3090.92	1.30038	0.000119523	0.000763002
HES2	17.3864	4.0317	0.000250038	0.00145626
HEXIM1	847.606	1.06823	6.29194e-06	5.6498e-05
HEY1	235.49	2.33031	8.81758e-11	2.31189e-09
HEYL	244.478	-1.2229	0.000198091	0.00118918
HGD	10876.8	4.44458	4.47893e-27	1.02785e-24
HHIP	149.807	-2.04632	0.000504557	0.00268983
HIF3A	90.9266	3.4788	5.71788e-21	6.17864e-19
HILPDA	104.634	1.17062	1.58346e-09	3.25165e-08
HINT1P1	62.5003	1.04084	0.000667127	0.00344394
HIP1R	1499.06	1.45849	1.05888e-09	2.23419e-08
HIPK2	944.952	-1.16313	8.74512e-12	2.69621e-10
HIPK3	5751.17	1.43449	3.63249e-13	1.41115e-11
HJURP	321.567	-1.64921	0.0158276	0.048744
HMCN1	3088.14	-1.81898	1.74551e-10	4.31245e-09
HMCN2	55.6998	-2.12048	0.000127292	0.000804033
HMGA1	1156.08	-1.57276	8.74007e-09	1.52951e-07
HMGA1P1	3.56072	-1.68141	0.00846705	0.0289875
HMGA1P2	200.703	-1.25441	5.27991e-06	4.85664e-05
HMGA1P8	54.3176	-1.03113	1.39446e-05	0.000114583
HMGA2	93.1375	-2.58331	1.67261e-10	4.15077e-09
HMGCLL1	2.14732	2.5492	0.0147121	0.0458029
HMGCR	7087.95	1.85411	2.48651e-08	3.93388e-07
HMGCS2	45.4796	7.73059	6.00798e-08	8.74438e-07
HMGN1P18	13.9612	-1.49284	0.0060013	0.0219334
HMGN1P38	46.5864	-1.03141	0.00443839	0.0170666
HMGN2P15	156.513	2.29766	4.84717e-09	8.9777e-08
HMGN2P46	10.148	-1.18629	0.00207024	0.00905907
HMGN5	282.663	-1.46156	1.53235e-07	2.03643e-06
HMMR	161.669	-2.38445	8.44471e-10	1.80576e-08
HNF1B	85.1208	1.49231	0.0154045	0.0476455
HNRNPA1P14	1058.35	-1.34438	2.50205e-07	3.16093e-06
HNRNPA1P22	19.6016	1.77258	0.0018538	0.00823336
HNRNPA1P34	7.77767	-1.77587	0.00337281	0.0136037
HNRNPA1P40	59.7729	-1.73363	2.52127e-05	0.000195689
HNRNPA1P41	9.33344	-1.16669	0.00592703	0.0217035
HNRNPA1P53	30.3314	-1.35541	0.00320976	0.0130406
HNRNPDLP2	3.19539	-3.12799	0.000247951	0.00144638
HNRNPH1P3	2.83946	-2.08952	0.00792604	0.0274862
HOMER2	3354.42	2.84465	4.36025e-48	4.85296e-45
HOOK1	989.16	1.24336	1.00813e-07	1.40344e-06
HOXD3	51.6076	-1.06459	5.12154e-06	4.72832e-05
HPCAL4	10.1134	6.13241	4.34488e-05	0.000314527
HPSE	879.955	3.74656	1.73996e-05	0.000139674
HS3ST1	63.244	-2.17049	1.18748e-12	4.25222e-11
HS6ST2	6.95408	-1.45536	0.00919785	0.0310218
HSD11B1	14.5205	2.24815	0.000973668	0.00476139
HSD11B2	943.711	1.34841	6.52855e-06	5.82701e-05
HSD17B14	91.3696	-1.27159	1.24524e-07	1.68505e-06
HSD17B2	567.686	7.15846	1.55602e-71	1.15457e-67
HSD17B2-AS1	27.2825	5.86349	4.78558e-11	1.30548e-09
HSPA2	2485.28	1.1899	0.000177686	0.0010792
HSPA7	21.1594	-1.6707	4.24829e-08	6.39398e-07
HSPB6	111.454	1.62946	1.40569e-11	4.17208e-10
HSPB7	11.2505	-2.69235	0.000309368	0.00174927
HSPD1P11	16.1945	1.41365	0.0122196	0.0393131
HSPD1P5	11.5735	-1.23543	0.00515367	0.0193003
HTATIP2	469.76	1.92083	8.59171e-09	1.50592e-07
HTR1D	15.7371	3.54193	2.97067e-05	0.000225394
HTR2A	24.473	2.5152	3.18969e-07	3.94897e-06
HTR2B	631.523	-1.02162	1.21766e-06	1.29813e-05
HTR7P1	7.20153	-1.07355	0.0157083	0.0484237
HTRA1	2348.44	-1.08717	2.14434e-07	2.7417e-06
HYDIN2	198.83	-1.53799	6.3604e-18	4.71942e-16
ICA1	1283.95	1.43654	3.08576e-14	1.41919e-12
ID2	1319.99	1.02125	1.38567e-08	2.32409e-07
ID4	210.879	1.61997	0.000125347	0.000793578
IDH1	6611.5	2.30437	3.93155e-05	0.000288642
IDO1	1399.52	2.38819	3.2162e-06	3.12358e-05
IDO2	339.772	5.7058	5.16312e-15	2.63e-13
IFI44	359.22	-1.15507	0.000195328	0.00117482
IFI44L	280.729	-1.96193	0.000201364	0.00120623
IFIT1	148.186	-1.7039	1.18826e-07	1.6158e-06
IFITM9P	1.41213	-3.01858	0.0141415	0.0443303
IFNA2	4.8547	-4.16926	9.42957e-06	8.08452e-05
IFNGR1	3267.76	2.33547	2.53969e-10	6.08915e-09
IFNLR1	17.9105	-2.06434	5.15213e-08	7.6153e-07
IGDCC4	99.9991	-2.25765	1.57149e-13	6.44225e-12
IGF2	71.0113	-2.0554	1.05045e-07	1.45327e-06
IGF2BP1	5.82227	-3.90603	2.84687e-07	3.56419e-06
IGF2BP2-AS1	12.4629	1.63331	0.0147867	0.046003
IGFBP2	1237.08	1.24809	1.37349e-11	4.08742e-10
IGFBP3	1343.82	-1.07394	0.00548512	0.0203295
IGFBP6	384.349	-1.32529	0.00106776	0.00514691
IGFBP7	6635.57	-1.09206	1.96955e-06	2.00376e-05
IGFN1	2568.98	-7.34624	4.04808e-31	1.26916e-28
IGHG3	8.92796	-4.71004	1.64895e-05	0.000133232
IGHV7-81	5.35749	2.94652	0.000665993	0.00343967
IGKC	344.723	-2.82912	3.07344e-05	0.000232466
IGKV1-16	2.9407	-3.09918	0.0081499	0.0281543
IGKV1D-39	1.76811	-2.96008	0.0128623	0.0409895
IGKV3-11	16.4775	-2.80157	0.0080942	0.0279908
IGKV3-20	21.1146	-3.20987	0.000684599	0.003517
IGLC2	164.041	-3.10646	0.000368174	0.00204225
IGLC6	1.58579	-4.66695	0.0127383	0.0406706
IGLV2-14	19.6279	-4.01472	7.02221e-05	0.000479492
IGLV3-12	1.46347	-4.01924	0.00647899	0.0233143
IGSF1	5.77936	-3.14322	7.69029e-07	8.64575e-06
IGSF11	139.505	3.35701	1.15237e-15	6.42901e-14
IGSF5	25.7305	-1.20131	9.03749e-05	0.000596652
IGSF9	510.991	1.17506	0.0102094	0.0338689
IGSF9B	29.5421	-1.3991	2.69694e-05	0.000207371
IHH	558.769	-3.37909	7.30215e-09	1.29519e-07
IKZF2	397.4	1.15022	0.0126273	0.0403856
IKZF3	135.783	-1.29537	9.63921e-05	0.000629973
IL10RA	450.719	-1.30796	2.14969e-06	2.17115e-05
IL12RB1	38.1444	-1.07427	0.00508789	0.0191118
IL13RA2	11.383	2.11014	0.00830011	0.02853
IL15	159.767	2.19817	1.66095e-08	2.74541e-07
IL17RD	441.708	-1.3675	3.85382e-46	3.57441e-43
IL18RAP	10.2263	-1.19949	0.0014453	0.00666526
IL1B	68.9354	-1.53497	0.00593154	0.0217129
IL1R1	2925.19	1.67191	2.86484e-08	4.4636e-07
IL1RN	90.1413	1.9175	0.0133957	0.0423803
IL20RA	1255.64	3.5105	2.58927e-36	1.20077e-33
IL27RA	52.3564	-1.65674	1.17653e-17	8.58672e-16
IL31RA	39.8313	-2.18319	4.05088e-05	0.000296425
IL32	274.294	-1.31837	0.000485287	0.00259978
IL33	500.007	-1.06206	1.13926e-10	2.93519e-09
IL6	8.68618	2.7105	0.00466748	0.0177877
IL6ST	7657.68	1.27676	6.94491e-05	0.000474942
IL6STP1	4.26539	2.35829	0.0139507	0.0438456
IL7R	122.31	-1.87556	0.000425429	0.00232305
IL9	6.27649	5.45018	0.000317927	0.00179075
IL9RP3	36.9872	1.93328	0.00183652	0.00816967
ILDR1	832.843	2.09555	2.22652e-41	1.45772e-38
ILDR2	7.00215	-2.68994	1.82645e-06	1.87099e-05
IMPDH1P6	6.50362	1.76365	0.00899726	0.0304792
IMPG1	7.85195	1.44444	0.00714544	0.0252392
INHBA	26.7543	-5.05043	4.59786e-09	8.55756e-08
INHBB	51.7736	1.79758	0.00918363	0.0309786
INKA2	81.1759	1.81728	2.02733e-14	9.52075e-13
INPP4B	1847.33	1.03557	0.00294986	0.0121465
INPP5K	527.516	1.01103	1.21015e-10	3.10704e-09
INSL3	5.48823	2.66717	0.00116532	0.00554958
INSR	3491.88	1.07744	0.00289464	0.0119545
INSRR	96.6757	3.0557	8.27658e-10	1.77321e-08
INSYN1	55.3327	2.12324	7.975e-06	6.97813e-05
INSYN2B	13.4652	-1.26065	0.0011074	0.00531268
INTS6L	317.665	-1.08623	1.58241e-13	6.47508e-12
IP6K3	79.7806	3.72139	8.37229e-11	2.21076e-09
IPO8P1	2.24791	3.93743	0.00605513	0.0220842
IQGAP3	473.811	-2.69777	1.60024e-07	2.11654e-06
IRAG1	804.662	-2.51216	2.48278e-12	8.40427e-11
IRF6	12.557	1.95507	0.00113766	0.0054414
IRF8	624.374	-1.49843	1.50284e-05	0.000122405
IRS1	3360.63	-1.29082	3.96325e-08	5.98521e-07
IRS2	1433.93	3.1509	1.04219e-26	2.27442e-24
IRS4	13.827	-1.16097	0.0129247	0.0411359
IRX3	210.178	4.60227	1.1725e-06	1.25541e-05
IRX5	19.8981	4.27745	0.000209377	0.00124785
ISG20	453.502	3.453	7.36453e-16	4.20344e-14
ISLR	1463.01	-1.07483	3.33621e-08	5.10406e-07
ISM1	110.07	-1.81686	0.00012354	0.000783029
ISM2	1.53221	-4.63234	0.00150462	0.00689436
ISOC1	576.062	-1.48941	1.75094e-15	9.43726e-14
ISYNA1	652.955	-1.65853	7.51694e-20	7.06022e-18
ITGA11	187.419	-3.38111	1.90123e-08	3.08914e-07
ITGA8	329.094	-1.397	0.00987213	0.032939
ITGA9	7440.79	-1.31229	1.91491e-05	0.000152508
ITGA9-AS1	42.7218	-1.38168	1.21632e-10	3.11568e-09
ITGAX	898.144	-1.12932	1.47481e-10	3.69699e-09
ITGB1BP2	46.7125	-1.06041	1.48519e-05	0.000121144
ITGB3	68.3397	-1.79656	0.000257685	0.00149299
ITGB4	4453.13	1.55944	0.000368944	0.00204601
ITGB8	6599.25	2.74586	6.08597e-22	7.3627e-20
ITGBL1	77.6515	1.56167	0.000476381	0.00255832
ITIH2	37.1	-1.28726	3.93894e-05	0.00028909
ITIH3	13.3932	-1.4333	0.00499437	0.0188081
ITIH5	454.734	-1.41054	0.000285395	0.00163146
ITIH6	2.93916	-2.28027	0.00343783	0.0138059
ITK	199.712	-1.0179	0.00643941	0.0232132
ITM2A	144.719	-1.16837	0.000592219	0.00309892
ITPKA	14.9288	1.58214	0.00257826	0.0108697
ITPKC	535.303	1.32205	6.31594e-10	1.38652e-08
ITPR3	6901.52	1.03184	8.47059e-08	1.19642e-06
IVNS1ABP	5948.41	1.46703	2.87223e-13	1.13362e-11
IYD	28.846	5.53459	1.04046e-10	2.69933e-09
JAKMIP2	41.599	-1.27822	0.00551962	0.0204301
JAKMIP3	47.8238	-1.18081	1.2003e-06	1.28086e-05
JAM2	191.357	-1.49527	2.90622e-07	3.63237e-06
JAML	151.704	-1.52237	0.000233746	0.00137577
JAZF1	621.106	1.40006	1.34875e-13	5.58052e-12
JAZF1-AS1	11.3751	1.59739	0.000231876	0.00136585
JCHAIN	36.2042	-2.37955	8.94536e-05	0.000591721
JOSD1	698.038	1.23182	6.45523e-50	7.98297e-47
JOSD2	93.5605	1.29254	1.43016e-12	5.06125e-11
JPH1	205.862	1.65304	4.68079e-08	7.01173e-07
JPH3	6.93728	-1.06933	0.0123049	0.0395118
JPT1P1	1.30365	-4.39904	0.000456985	0.00246905
JUN	1839.77	1.05812	0.000388932	0.00214191
JUNB	254.37	1.05343	0.0137926	0.0434473
JUND	1346.02	1.03547	3.64489e-07	4.45798e-06
JUP	6792.2	1.96111	1.72847e-10	4.27509e-09
KARS1P1	4.81958	-2.11942	0.000965785	0.00472699
KBTBD12	27.3746	-1.68998	0.000235718	0.00138555
KBTBD3	75.0297	1.44787	6.72712e-06	5.99462e-05
KCNA3	6.40981	-1.52153	0.0130122	0.0413434
KCNA6	6.04013	-1.59557	0.012184	0.0392158
KCNB1	69.1391	2.57995	2.71929e-08	4.25379e-07
KCNB2	1.46019	-4.08196	0.000500088	0.00266761
KCNC2	21.677	-3.09732	5.93568e-07	6.86738e-06
KCND1	87.0761	-1.19467	2.51836e-11	7.22406e-10
KCND2	131.92	-1.81198	2.54865e-05	0.000197469
KCNG1	106.741	2.36641	0.0019345	0.00854573
KCNG3	144.097	1.80984	7.40558e-09	1.31249e-07
KCNH1	74.3071	2.37556	4.49994e-09	8.41754e-08
KCNH2	37.025	-1.49345	0.000181444	0.00109933
KCNH5	39.216	5.65259	0.000245696	0.00143398
KCNH8	24.3263	-1.68182	4.7162e-05	0.000339201
KCNIP1	72.333	1.18989	0.00188412	0.00835301
KCNIP4	112.323	-1.38179	4.22859e-06	3.99018e-05
KCNIP4-IT1	8.12605	-4.51818	1.2419e-06	1.32144e-05
KCNJ2	188.355	1.37885	0.0054931	0.0203421
KCNJ5	24.2931	-1.63946	1.08524e-08	1.86256e-07
KCNK1	335.379	2.01646	1.07291e-15	6.01586e-14
KCNK13	67.2682	5.51229	1.60875e-11	4.71815e-10
KCNK15	11.374	-3.13853	1.86861e-06	1.90979e-05
KCNK2	18.4983	-2.79948	2.07565e-07	2.66825e-06
KCNK3	6.57589	-2.33601	0.000691372	0.00354525
KCNN1	26.1967	-1.34665	0.0118502	0.0383019
KCNN4	26.9102	-2.98991	9.33896e-11	2.43711e-09
KCNQ1	272.564	-1.30034	1.8551e-11	5.40506e-10
KCNQ1OT1	126.044	-1.29947	3.36601e-09	6.476e-08
KCNQ3	226.807	2.75101	8.16355e-10	1.75237e-08
KCNT2	30.2094	-2.34479	5.8202e-06	5.273e-05
KCP	101.456	-1.53257	4.23728e-05	0.000308342
KCTD12	65.6267	-1.52621	1.4825e-07	1.97726e-06
KCTD17	207.348	-1.09549	5.20136e-15	2.64343e-13
KCTD9P1	56.7712	1.32663	0.00543485	0.0201869
KDF1	129.418	1.01645	3.42608e-08	5.23435e-07
KERA	1.93324	-4.50237	0.00481978	0.0182619
KHDRBS2	97.542	-4.39926	1.20832e-10	3.10591e-09
KHDRBS3	536.977	1.45865	7.37901e-05	0.00049926
KHK	35.4406	-1.28806	6.0388e-08	8.78012e-07
KIAA0513	292.618	1.32085	6.92936e-05	0.000474024
KIAA1549L	20.9403	-1.81821	1.40647e-05	0.000115485
KIF13B	4236.45	1.1216	3.58951e-14	1.64071e-12
KIF14	305.681	-2.15125	1.2556e-09	2.62438e-08
KIF15	262.487	-1.78513	0.00445767	0.0171232
KIF18A	251.293	-1.8571	0.00282647	0.0117423
KIF18B	148.341	-2.56024	8.64371e-08	1.22009e-06
KIF1A	102.147	-1.27205	0.0024102	0.0102839
KIF20A	411.519	-2.44362	2.0221e-08	3.2736e-07
KIF20B	405.683	-1.21873	0.000765089	0.0038589
KIF21A	2866.81	-1.39456	1.03499e-12	3.76452e-11
KIF23	451.844	-2.39042	9.75121e-10	2.06726e-08
KIF25	7.25562	-1.58989	0.00312311	0.012742
KIF2C	267.306	-2.18405	7.66066e-09	1.35338e-07
KIF4A	475.298	-2.45199	1.06404e-08	1.83325e-07
KIF4B	25.6403	-1.37407	0.000198876	0.00119229
KIF5C	8.2705	-1.30886	0.00223742	0.00966712
KIFC2	209.066	1.52014	1.15588e-14	5.58132e-13
KIRREL2	4.44024	-2.29847	0.00234234	0.0100466
KLB	11.929	1.6068	0.0137095	0.0432381
KLC3	5.83737	2.49983	0.00122483	0.00580102
KLF14	1.74438	-3.94525	0.00337884	0.0136231
KLF15	135.329	2.80066	7.67991e-15	3.80746e-13
KLF17	1.51872	-4.62193	0.000765747	0.00385995
KLF4	747.302	2.22741	5.37002e-12	1.71256e-10
KLF5	1009.49	2.21369	9.18724e-14	3.89539e-12
KLF6	10449.7	2.73707	4.99799e-11	1.35843e-09
KLF7	416.368	1.13763	8.63998e-07	9.6019e-06
KLF8	156.54	1.40014	2.43221e-15	1.30147e-13
KLF9	408.992	2.40064	5.79749e-41	3.6872e-38
KLHDC7A	8.54371	1.76355	0.0133272	0.0422102
KLHL21	181.639	1.11771	4.19188e-06	3.9589e-05
KLHL23	218.108	-2.16641	4.6025e-17	3.12353e-15
KLHL3	351.689	-1.05952	0.000219999	0.00130209
KLHL31	110.185	1.2579	0.00388468	0.0152684
KLK1	21.1541	-3.33686	6.15355e-06	5.53223e-05
KLK13	8.49154	-2.52943	4.25895e-05	0.000309615
KLK2	17.8859	-3.63634	1.70092e-06	1.75451e-05
KLK3	7.16296	-3.07644	3.40789e-06	3.28397e-05
KLK4	141.143	-2.80467	1.27871e-05	0.00010621
KLRC3	37.5883	-1.90977	1.25241e-17	9.1107e-16
KLRG1	16.7812	-1.07333	0.00413922	0.0161167
KMO	453.338	-2.18628	0.00945864	0.0317475
KNL1	318.76	-1.58386	0.0110829	0.0361897
KPNA4P1	4.31208	-2.23515	0.0015844	0.00720949
KRBA2	32.4996	-1.09748	1.76396e-07	2.30568e-06
KRT16	10.5591	-2.8923	0.00278107	0.0116017
KRT18	7855.84	1.66291	4.01556e-09	7.57512e-08
KRT18P16	8.44352	2.15421	0.00273	0.0114208
KRT18P17	185.101	1.52334	6.16921e-07	7.10066e-06
KRT18P28	134.985	1.3871	3.33858e-05	0.000249721
KRT18P38	11.9539	1.89789	3.53869e-05	0.000262833
KRT18P5	77.2025	-1.05324	0.000938112	0.00460878
KRT18P60	9.94704	-1.39501	0.0095517	0.0320099
KRT18P65	2.48025	2.77671	0.0106178	0.0349738
KRT18P8	8.41345	1.5146	0.00269338	0.011293
KRT19	7431.74	1.43153	4.45332e-06	4.17569e-05
KRT42P	1.80346	-4.37743	0.0010512	0.00507917
KRT6A	160.034	2.24078	0.0132993	0.0421471
KRT8	16888.6	2.05339	2.2597e-07	2.87763e-06
KRT80	130.938	3.39677	1.04579e-06	1.13502e-05
KRT85	6.24881	4.86784	3.24239e-06	3.14491e-05
KRT8P1	3.77128	-2.16543	0.00162935	0.00738382
KRT8P15	57.2703	-1.10651	0.0120503	0.038862
KRT8P28	11.3381	2.07102	0.00313567	0.0127815
KRT8P39	41.4525	-1.01523	0.0135649	0.0428485
KRT8P46	31.362	-1.12684	0.000455357	0.00246264
KRT8P48	30.6685	1.67835	0.00983189	0.032832
KRT8P8	3.60866	4.02451	0.00117658	0.00559608
KRTAP10-12	1.39488	-4.01479	0.00305524	0.0125179
KSR1	2539.25	1.60453	5.84281e-06	5.29133e-05
KYNU	601.268	1.51797	6.71845e-07	7.65366e-06
LACC1	51.9747	1.35751	6.71433e-10	1.46674e-08
LAMA1	1794.4	-3.14261	1.34209e-10	3.40261e-09
LAMA3	3740.44	-1.85333	3.32806e-10	7.81355e-09
LAMA4	4725.68	-1.56153	3.27311e-09	6.31276e-08
LAMA5	4451.44	1.02167	0.00164735	0.00744718
LAMB1	22462.3	1.31604	2.50927e-12	8.47591e-11
LAMB4	20.4131	1.09793	0.00908062	0.0307055
LAMC2	2780.83	-1.53856	0.00015646	0.00096343
LAMP3	65.776	-1.99482	1.38716e-05	0.00011411
LAMP5	31.9181	-4.34135	1.01544e-13	4.28913e-12
LAPTM4B	2609.73	-1.03466	4.98842e-07	5.90022e-06
LAPTM4BP2	27.0106	-1.42628	6.10668e-05	0.000424796
LARGE2	933.333	1.88591	1.64631e-07	2.17489e-06
LBH	246.114	-1.82463	7.73701e-08	1.10543e-06
LBP	170.006	5.91207	1.0033e-05	8.55037e-05
LCN12	51.0729	2.60022	1.74399e-05	0.000139947
LCN2	160.931	-2.67664	1.72228e-05	0.000138554
LCNL1	2.66562	2.92723	0.0123272	0.0395622
LDHA	14158.8	1.44313	3.78911e-09	7.20288e-08
LDHAL6CP	2.63909	4.20786	0.00116018	0.00553131
LDHAP3	10.6432	1.01068	0.0100057	0.0332964
LDHAP7	5.31356	2.30037	0.00104112	0.00504031
LDHD	53.5231	1.70404	3.90734e-09	7.39604e-08
LEF1	1161.29	-1.67758	8.36618e-15	4.11106e-13
LEFTY1	14.043	4.85517	1.58307e-05	0.000128283
LENEP	6.12181	1.72659	0.00282326	0.0117315
LENG8	1.17187	3.07502	0.0138638	0.0436258
LETM1P2	15.009	-1.64124	1.65283e-05	0.000133498
LFNG	398.998	-1.17573	7.74064e-05	0.000521351
LGALS3	3050.65	1.83318	1.20858e-15	6.70895e-14
LGALS9	1060.98	-1.7648	6.00074e-28	1.48418e-25
LGI2	16.3976	-1.09781	0.00733354	0.0257646
LGR4	1765.44	1.94069	3.17441e-25	5.88854e-23
LGR6	6.6451	-1.84792	0.000529259	0.00280775
LHFPL3	357.763	6.75687	8.48477e-47	8.29607e-44
LHFPL3-AS1	1.6355	3.47286	0.00223492	0.0096582
LIG1	1495.96	-1.52871	3.96367e-09	7.48992e-08
LIMK2	1329.55	1.0961	0.000100601	0.000653643
LINC00261	1.73347	-3.42163	0.0022583	0.00974221
LINC00303	6.64182	-4.53564	4.54882e-09	8.48757e-08
LINC00639	2.18032	-3.02561	0.000972212	0.00475531
LINC00662	2.20006	-2.63987	0.00291816	0.0120316
LINC00665	6.06077	-2.23536	7.30821e-06	6.45046e-05
LINC00937	14.9439	-1.09132	0.00900901	0.0305005
LINC00957	5.89798	1.69701	0.00631293	0.0228349
LINC00994	2.20632	-3.04895	0.00941054	0.0316099
LINC01100	3.90862	4.12576	0.00589317	0.0216115
LINC01101	2.83007	-5.02281	2.33927e-07	2.96877e-06
LINC01278	4.55053	-1.40718	0.0159494	0.049045
LINC01320	33.1006	4.39172	5.6957e-06	5.17707e-05
LINC01391	1.98962	-2.64479	0.0027901	0.0116263
LINC01502	3.15198	4.49261	0.00179149	0.00800774
LINC01541	53.3148	1.83567	0.000127579	0.000805188
LINC01550	10.0279	-1.554	0.00026229	0.00151533
LINC01948	18.0081	-1.07024	0.00260287	0.0109587
LINC02595	1.27901	-3.89635	0.00099552	0.00485651
LINC02600	8.06016	-1.31377	0.00731998	0.0257292
LINC02873	1.45706	3.4029	0.00588287	0.0215809
LINC02903	3.77353	4.68334	0.00177243	0.00794001
LINC02913	8.84331	-1.14274	0.0136982	0.0432144
LINC03010	7.18209	-6.01955	7.11125e-08	1.01864e-06
LINC03026	39.555	3.77489	2.04586e-10	4.9935e-09
LINC03033	4.7329	3.27515	0.00115637	0.00551669
LINGO2	154.413	3.46435	5.99579e-29	1.58889e-26
LINGO4	31.6959	2.99801	1.19163e-06	1.27283e-05
LIPG	418.721	1.82903	2.64273e-08	4.16623e-07
LIPH	16.8264	-1.58797	0.00103565	0.00501602
LLGL2	1407.42	1.82851	2.6207e-16	1.62498e-14
LMCD1	204.762	1.82183	1.53757e-07	2.04214e-06
LMNB1	738.828	-1.75945	0.00172054	0.00773411
LMO7	1280.34	1.5205	5.93425e-09	1.0757e-07
LMTK3	53.1654	1.14827	0.000439203	0.00238455
LNX2	758.871	1.17788	4.57228e-09	8.52178e-08
LONRF3	476.495	2.28243	5.28261e-22	6.46103e-20
LPA	39.7254	-3.39547	4.31441e-10	9.86025e-09
LPAL2	236.43	-1.0694	0.000225349	0.00133164
LPAR2	62.0773	1.22203	5.28598e-05	0.000374494
LPAR3	319.166	1.2487	3.85569e-05	0.00028354
LPAR5	23.714	1.14809	0.00637052	0.0230021
LPCAT3	1155	1.71566	6.20448e-20	5.92755e-18
LPIN3	1832.92	2.85178	1.713e-16	1.09889e-14
LRCH2	235.496	-1.06186	4.04662e-13	1.56114e-11
LRFN4	125.866	1.15628	2.46223e-09	4.88931e-08
LRFN5	321.587	-1.35255	1.19323e-20	1.22402e-18
LRIG3	1420.19	1.17127	2.2465e-09	4.48092e-08
LRP10	985.466	1.1371	2.54176e-11	7.27243e-10
LRP12	332.527	-1.02557	5.2675e-14	2.34979e-12
LRP4	3094.19	1.73963	0.000833975	0.00415494
LRRC1	2048.99	3.20074	8.57186e-47	8.29607e-44
LRRC26	61.0139	8.15496	4.51297e-12	1.46263e-10
LRRC31	32.9432	2.05063	0.0046654	0.0177828
LRRC32	85.4995	-2.03302	5.1278e-07	6.03622e-06
LRRC37A11P	4.09431	-2.49193	0.000626655	0.00325539
LRRC37A14P	6.91946	1.74729	0.0114832	0.0372888
LRRC37A6P	63.6358	-1.2381	0.000927231	0.00456136
LRRC4B	120.858	-1.66524	1.07845e-07	1.48788e-06
LRRC52	15.1712	5.55665	3.65638e-07	4.46958e-06
LRRC55	1.78828	-2.73633	0.00972221	0.0325047
LRRC59	2452.31	1.03438	2.03792e-05	0.000161151
LRRK2	670.797	-1.48439	2.87102e-09	5.61097e-08
LRRN1	51.0753	-2.8137	8.93382e-07	9.87422e-06
LRRTM3	5.96343	1.85693	0.00546821	0.0202837
LRRTM4	53.5087	-4.93712	4.13881e-11	1.14447e-09
LSM14A	24.3373	-2.66018	0.000100023	0.000650269
LSMEM1	5.98771	2.08342	0.00444245	0.0170763
LSS	243.141	1.30316	5.18443e-11	1.40738e-09
LTBP1	3627.5	-2.14025	3.18969e-08	4.90688e-07
LTBP2	2938.74	-3.0265	7.91088e-19	6.62016e-17
LUM	7829.13	-2.25626	1.68805e-16	1.08601e-14
LURAP1L	46.1329	1.61163	0.00119247	0.00566222
LY9	19.2438	-1.22548	0.01105	0.0361102
LYPD3	143.324	3.96691	3.09089e-05	0.000233548
LYPD6	24.7764	-1.52753	0.00524359	0.019581
LYPLA1	542.203	1.08412	4.12032e-06	3.90457e-05
LYPLA1P3	31.4656	1.42888	0.000198392	0.00119035
MAB21L3	56.203	4.69953	3.55135e-10	8.28647e-09
MAD2L1	105.803	-1.51021	0.00546067	0.0202659
MAFF	16.5172	2.66334	1.73001e-05	0.000139026
MAFK	150.997	2.33246	1.05469e-09	2.22745e-08
MAGEA11	4.89453	5.08871	0.000313791	0.00177085
MAGED4B	4.3402	-3.16799	0.00284336	0.0117962
MAGEE1	67.8208	-1.33205	9.3923e-15	4.595e-13
MAGEE2	15.366	-1.16936	0.00372766	0.0147726
MAGEL2	98.9875	-2.23941	3.05408e-08	4.71782e-07
MAGI2-AS3	6.19378	-1.92621	0.000435451	0.00236707
MAGIX	52.6312	1.95283	5.82764e-12	1.85069e-10
MAL2	635.161	1.21186	4.71713e-12	1.52179e-10
MALAT1	3434.21	1.05291	5.45742e-05	0.000385169
MALRD1	74.378	-1.4472	4.89428e-06	4.54134e-05
MAN2B2	1831.8	1.33307	8.32975e-08	1.18027e-06
MAOA	6800.17	4.11267	1.45587e-14	6.98443e-13
MAOB	1331.65	1.0798	5.12529e-13	1.95358e-11
MAP1LC3B	638.989	1.33793	1.04166e-10	2.69933e-09
MAP1LC3B2	69.6753	1.307	1.69321e-08	2.78985e-07
MAP2K6	2793.49	1.98106	0.000280949	0.00160976
MAP3K5	2509.85	1.98877	1.59046e-06	1.65283e-05
MAP3K6	777.878	1.01274	5.29546e-05	0.000375046
MAP3K8	298.15	1.26888	0.000386095	0.00212787
MAP4K1	107.941	-1.40248	1.28806e-05	0.000106946
MAP7	1625.98	1.76923	4.2639e-12	1.38967e-10
MAPK13	388.028	1.03344	8.67438e-11	2.27971e-09
MAPK4	4.01551	-3.46776	1.34063e-05	0.000110768
MAPK6P4	8.82588	2.13229	0.00222317	0.00962048
MAPK6P5	10.8335	3.40821	0.000207746	0.00123979
MARCKSL1	178.51	-1.5264	6.05935e-19	5.12856e-17
MASP1	2825.52	2.17422	4.70888e-13	1.80103e-11
MATN1	3.71412	-2.60234	0.000320838	0.00180532
MC3R	2.50513	-5.34124	7.28845e-05	0.000494433
MC4R	2.47453	-2.95581	0.00436284	0.0168284
MCIDAS	5.73354	-2.16158	0.00239707	0.0102436
MCM10	210.044	-2.64704	4.22337e-08	6.36507e-07
MCM2	415.507	-1.25393	0.00442455	0.0170252
MCM4	1356.21	-1.10607	0.00141415	0.00654589
MCUR1	641.014	1.0133	3.38333e-10	7.92769e-09
MDGA2	7.5431	-1.83188	0.000773817	0.00389254
MDK	3323.48	-1.33353	1.08627e-09	2.28331e-08
MED12L	85.3619	-2.86035	3.51306e-36	1.53335e-33
MEDAG	163.984	4.89266	2.12647e-25	4.04575e-23
MEF2C	273.949	-1.11484	2.72855e-12	9.14721e-11
MEGF10	408.031	3.31786	1.68814e-12	5.86241e-11
MEGF11	47.1853	1.02821	0.0119981	0.0387182
MELK	345.013	-1.73789	0.00385243	0.0151799
MEST	564.495	-2.01928	5.56588e-14	2.46806e-12
MEX3A	178.447	-1.89328	3.09041e-12	1.02676e-10
MEX3B	160.456	-1.58723	3.35545e-21	3.73462e-19
MFAP2	710.977	-2.65667	2.65962e-10	6.34545e-09
MFAP4	155.491	-3.17203	1.1549e-19	1.04931e-17
MFAP5	94.9917	2.43859	4.35323e-05	0.000315029
MFSD4A	1573.43	5.77427	1.23972e-13	5.14855e-12
MFSD6	1140.63	2.03956	7.60406e-11	2.01988e-09
MFSD6L	48.1398	1.51595	0.000692039	0.00354786
MGARP	7.22589	-1.6442	0.00673487	0.0240446
MGAT4B	1888.55	1.02308	7.38825e-10	1.60139e-08
MGAT5B	11.9139	-1.70767	0.000712196	0.00363154
MGLL	1649.78	1.23876	9.63362e-12	2.94972e-10
MGP	1848.77	-1.37872	0.000832466	0.00414928
MGST1	1883.69	3.20503	6.08196e-28	1.48774e-25
MGST2	2558.72	1.26132	2.97947e-10	7.05563e-09
MIAT	4.38916	-1.89389	0.00313317	0.0127737
MICOS10	28.6867	-1.3545	4.15498e-07	5.01572e-06
MIEN1	392.543	1.11264	9.07537e-19	7.45453e-17
MINAR2	7.22785	-1.70423	0.000193404	0.0011645
MIR100HG	6.87589	-2.08989	0.000456953	0.00246905
MIR1205	4.76487	1.98382	0.00746641	0.0261612
MIR1261	1.75814	3.65406	0.00317846	0.012937
MIR200CHG	7.64588	1.25593	0.0117129	0.0378968
MIR424	1.24101	-3.3355	0.0123762	0.0396966
MIR503	2.00479	-2.9076	0.00495865	0.0186926
MIR503HG	7.47229	-4.13902	1.06631e-08	1.83574e-07
MIR554	10.3395	1.31372	0.00745018	0.0261227
MIR616	22.5465	1.0484	0.00989572	0.0329956
MIR624	1.77105	2.96838	0.0115382	0.0374294
MIR654	6.60344	1.4219	0.00727524	0.0255921
MIR6845	31.0623	1.51009	4.03408e-05	0.000295487
MIR873	4.11123	4.22182	0.000126213	0.000798836
MIR921	3.41618	-1.81609	0.00837702	0.02875
MIRLET7G	10.8128	1.31905	0.00277443	0.0115816
MIRLET7IHG	2.99082	-2.06137	0.0143453	0.0448493
MISP3	44.2136	2.23777	6.36361e-13	2.3928e-11
MKI67	6044.78	-2.52671	4.91669e-09	9.07266e-08
MKRN2OS	84.847	1.17079	0.00051351	0.00273071
MLIP	30.8741	6.59203	2.74188e-10	6.52772e-09
MLLT11	26.4535	-1.33165	0.0103951	0.0343829
MLPH	575.846	-2.22463	3.12188e-19	2.70401e-17
MLX	940.035	1.05327	2.21226e-18	1.72789e-16
MLXIPL	27.0418	-1.35996	1.17353e-05	9.83538e-05
MMD	150.409	-1.23911	8.64127e-06	7.48171e-05
MME	12118.9	1.81133	6.90152e-16	3.98422e-14
MMP1	9.4816	-3.69682	0.00160287	0.0072816
MMP13	4.50765	-3.79125	0.000134441	0.000842999
MMP16	421.667	-1.53048	8.39612e-07	9.34956e-06
MMP2	14872.6	-1.05188	6.83057e-08	9.81591e-07
MMP20	3.95389	-4.60795	0.000167239	0.00102105
MMP26	4812.42	4.26599	6.65696e-13	2.49048e-11
MMP7	5317.69	-4.66835	3.24825e-05	0.000244005
MMP9	67.5824	-2.6447	0.00150281	0.00688748
MN1	52.7226	-2.37901	9.48666e-15	4.63099e-13
MNDA	26.9557	-1.48683	0.00649374	0.0233612
MOB2	225.128	1.08217	5.61763e-09	1.02499e-07
MOCOS	1694.52	2.13758	1.54907e-06	1.61359e-05
MOGAT1	272.359	3.01814	1.51995e-23	2.2556e-21
MORF4L1P5	2.65189	-2.28302	0.00814538	0.0281459
MOV10L1	120.62	-1.23434	6.84112e-06	6.08526e-05
MPC1	427.006	1.90763	1.57429e-09	3.23579e-08
MPEG1	467.504	-1.26149	1.50636e-10	3.75495e-09
MPP2	29.6233	-2.10054	1.04244e-07	1.44577e-06
MPRIPP1	30.4317	-1.11264	0.000278112	0.00159597
MPZL2	2690.93	3.43176	1.83297e-27	4.25019e-25
MPZL3	332.389	1.78815	2.67133e-09	5.25299e-08
MRAP	20.205	1.50566	0.000406811	0.00223122
MRAP-AS1	11.718	1.76295	0.000231453	0.00136408
MRAP2	27.4477	-2.3886	1.74156e-08	2.85262e-07
MRGPRE	2.08265	-5.08014	0.000474954	0.00255189
MRGPRF	56.0115	-1.74187	8.61955e-06	7.4658e-05
MROH1	2805.09	1.01242	1.00093e-11	3.05215e-10
MRPL3	2786.1	1.34816	0.000616584	0.00321057
MRPL3P1	116.362	1.36317	0.000709691	0.0036225
MRPL41	116.305	1.44505	1.01039e-11	3.07257e-10
MRPS18AP1	108.256	1.11375	2.24135e-05	0.000176298
MRPS6	136	-1.70607	3.11036e-22	3.86653e-20
MRPS6P2	5.56571	-1.90343	0.00838781	0.0287826
MS4A1	20.2994	-2.50631	0.00216889	0.00941487
MS4A2	13.355	-4.28509	1.51741e-07	2.0226e-06
MSANTD3P1	15.0868	1.72862	0.00503778	0.0189491
MSC	11.31	-2.01089	6.75699e-05	0.000463747
MSC-AS1	19.1645	-2.94077	1.56033e-12	5.46976e-11
MSI1	190.155	-1.39281	1.0825e-07	1.49045e-06
MSLNL	41.9236	5.02632	1.01911e-08	1.76677e-07
MSRB3	159.566	-1.03259	2.15764e-05	0.000169954
MST1R	434.768	1.37761	6.80258e-05	0.000465924
MSX2	488.873	-2.40469	6.35349e-09	1.14332e-07
MT-ND1	329.96	-1.10853	5.20919e-08	7.67925e-07
MT1E	2606.58	3.51958	4.70359e-12	1.51962e-10
MT1F	2720.33	4.12303	8.68992e-19	7.16436e-17
MT1G	5469.71	6.07547	5.08886e-26	1.03925e-23
MT1H	938.022	8.12815	3.4321e-29	9.43192e-27
MT1HL1	33.825	7.88462	1.35564e-11	4.0397e-10
MT1JP	3.05649	4.42777	0.0127532	0.0407122
MT1M	759.737	5.55385	7.3671e-17	4.89527e-15
MT1P3	95.4164	3.30849	8.97949e-09	1.56771e-07
MT1X	1351.91	3.89739	2.28128e-15	1.22364e-13
MT1XP1	16.6384	2.18865	0.00101691	0.00494136
MT2A	2170.55	2.71061	1.54211e-08	2.56941e-07
MTARC1	120.581	2.50014	3.12887e-07	3.87889e-06
MTATP6P1	60.4175	-1.20592	2.46028e-06	2.45807e-05
MTHFD2	590.511	1.85453	8.72561e-11	2.29047e-09
MTHFR	1072.82	1.19268	3.58755e-08	5.4474e-07
MTMR8	187.898	-1.09303	3.40732e-06	3.28397e-05
MTNR1A	31.142	4.99239	1.11079e-06	1.19739e-05
MTR	14965.2	1.53612	6.69126e-14	2.92054e-12
MTUS2	302.012	-4.97313	6.26094e-19	5.27911e-17
MUC1	3619.39	1.95961	6.79704e-09	1.21626e-07
MUC15	206.621	4.92221	8.88779e-20	8.27792e-18
MUC16	30219.3	-1.88263	2.47094e-05	0.00019205
MUC4	228.881	-5.04865	6.90198e-06	6.13326e-05
MUC5AC	259.058	-5.8007	3.72532e-16	2.23519e-14
MUC5B	10416	-3.93247	0.000249017	0.00145131
MUC7	49.3208	1.40152	0.0156784	0.0483514
MVP	2727.5	2.15052	2.09233e-22	2.67673e-20
MXRA5	1432.82	-1.2591	0.0011472	0.00547999
MXRA7P1	140.867	1.17019	1.49925e-10	3.74961e-09
[truncated: 1,411 more rows]

## Sheet: Prolif vs LH11.13
GeneID	Base mean	log2(FC)	P-value	P-adj
AADACL4	5.94771	3.05672	0.00211823	0.0174416
ABAT	593.696	1.57237	1.5564e-12	6.8089e-10
ABCA1	7932.57	1.00107	0.00106052	0.0104772
ABCA3	533.653	1.27251	4.39863e-05	0.00096741
ABCA6	597.647	2.05607	3.28417e-06	0.00012951
ABCC3	2880.43	2.70069	2.12236e-05	0.000571758
ABCC8	1319.49	1.96932	7.50593e-05	0.00146508
ABCD2	88.8873	-2.17984	7.07792e-06	0.000246004
ABCG1	962.662	2.4624	6.39275e-06	0.000227283
ABCG2	486.567	-1.05906	0.00161	0.0142416
ABHD17C	105.983	1.59502	9.93756e-06	0.000324648
ABHD5	2333.68	1.2373	5.75512e-06	0.000208723
ABO	205.968	1.76309	0.000434099	0.00536268
ABR	20.3502	2.78563	0.00747111	0.0429757
ABRA	12.39	-1.05946	0.00328953	0.0237342
ABTB3	134.406	-1.58031	0.00866534	0.0477014
ACADSB	1102.18	1.90605	0.00043346	0.00535853
ACAN	173.668	1.84888	0.000704511	0.00778472
ACBD7	16.0849	-1.12094	0.00819739	0.0459112
ACKR2	78.1295	1.7981	0.000153385	0.00248929
ACOT1	93.7422	1.53372	0.000200004	0.00303078
ACOT11	401.753	1.25038	0.000327862	0.00433502
ACP3	812.252	3.85551	7.99151e-13	3.74003e-10
ACP4	17.5144	-1.29935	0.000342762	0.00447614
ACSL4	2779.44	1.65145	0.000106084	0.00191122
ACSL5	12984.1	1.88684	3.30856e-07	2.15474e-05
ACSM1	62.912	1.34648	0.00580855	0.0357247
ACSM3	728.068	2.36118	1.42237e-07	1.04477e-05
ACTBP15	13.5914	-1.97704	2.06116e-05	0.000561589
ACTG1P4	2.53678	-2.7614	0.00130723	0.0120963
ACTN2	24.3462	1.62955	7.10035e-05	0.00140915
ACTR3C	144.756	1.03427	0.000717996	0.00790895
ACTRT3	26.2892	-1.16879	0.00599466	0.0365123
ADAM29	4.6751	-2.85016	0.00139737	0.0127416
ADAMTS1	3360.91	2.12773	1.7259e-05	0.000491258
ADAMTS15	261.012	3.33244	4.9167e-09	6.77697e-07
ADAMTS16	909.351	-1.82813	0.00287243	0.0215288
ADAMTS4	214.434	2.30858	0.000361748	0.00467554
ADAMTS5	663.758	2.73839	1.17025e-06	5.8005e-05
ADAMTS8	634.755	4.48458	4.16317e-05	0.00092387
ADCY1	889.629	2.43526	1.46489e-05	0.000432885
ADCYAP1R1	476.693	-2.80358	0.000171197	0.00269972
ADGRB1	37.4875	-2.48361	3.73029e-05	0.000851115
ADGRB2	87.412	-1.86374	0.00671953	0.0397133
ADGRF1	888.706	6.27083	1.56325e-06	7.29903e-05
ADGRF3	72.8803	-1.16123	0.00447193	0.0295253
ADGRF4	15.0807	2.75151	0.00321849	0.0233486
ADGRG3	97.1938	1.7281	0.00415615	0.0280102
ADGRL1	1071.4	-1.01171	0.00328215	0.0236993
ADM	130.282	2.50545	0.000264942	0.00373891
ADORA3	15.7545	1.20868	0.00733587	0.0424565
ADPRH	47.0225	1.1028	0.000830081	0.00879187
AFDN-DT	172.9	1.67366	0.00042062	0.00524446
AFF2	227.343	-1.66571	0.00825003	0.046169
AGPAT5	534.465	1.42403	0.000299533	0.00410333
AGR2	2234.08	1.42695	0.00744797	0.0429691
AGXT2	11.6705	3.41496	0.00315469	0.0230855
AIMP1	1733.96	2.00944	1.24319e-05	0.000382537
AJUBA	210.202	-1.3296	0.00232124	0.0186032
AK4	95.41	1.50173	0.000952386	0.00967482
AK4P1	30.269	1.41117	0.000864933	0.00905614
AK5	40.741	2.39746	0.000564417	0.00658072
AKAP13	9257.26	1.32027	1.14399e-15	1.7709e-12
AKNAD1	14.0686	-1.84396	1.06989e-05	0.000344487
AKR1B10	60.2527	4.72453	4.9764e-05	0.00106731
AKR7A3	40.2965	-1.13745	0.000132387	0.00223316
ALDH1A3	644.325	4.06558	5.57514e-10	1.09994e-07
ALDH3A1	9.29887	-1.70529	0.00181609	0.0155585
ALDH8A1	59.6403	2.9228	0.00019289	0.0029654
ALMS1P1	28.3237	-1.04464	0.000135828	0.00227216
ALOX12B	64.1842	3.84971	0.000117026	0.00206039
ALOXE3	7.72779	4.73888	0.000321704	0.00428783
ALPK2	96.6767	4.70579	2.26981e-06	9.63662e-05
ALPP	52.181	-3.31835	0.000320154	0.00428662
AMIGO2	695.431	1.92526	7.30887e-05	0.00143918
AMZ1	50.9277	2.31881	0.00259752	0.0200355
ANG	159.733	2.77346	8.54805e-07	4.46808e-05
ANGPTL1	214.013	2.58782	1.03512e-07	7.92043e-06
ANGPTL5	5.3366	4.17163	0.00195794	0.0164765
ANK2	2466.17	-1.69773	4.93207e-05	0.00106153
ANKRD18CP	21.0486	-1.65845	0.000188891	0.0029173
ANKRD20A1	48.5715	2.32756	0.00122353	0.0116086
ANKRD29	121.211	-1.95539	7.23547e-05	0.00142752
ANKRD30A	7.97244	5.37116	0.000128841	0.00218986
ANKRD33B	31.0847	2.04922	3.50547e-06	0.000136185
ANKRD35	633.93	2.16404	0.000293358	0.00404159
ANKRD37	13.3212	1.80626	0.00440729	0.0291751
ANKRD55	169.627	7.06274	1.00929e-07	7.81194e-06
ANKRD9	8.37429	1.45369	0.00771606	0.0439507
ANO1	2466.75	-1.94157	0.00122075	0.0115879
ANO4	904.986	-2.18867	0.000211949	0.00315711
ANOS1	137.839	1.21468	0.00114597	0.0110819
ANXA1	4689.79	1.25131	0.00425312	0.028459
ANXA2	22613	1.89996	6.19185e-07	3.50013e-05
ANXA2P1	188.514	1.52034	0.00010939	0.00195677
ANXA2P2	274.315	1.83078	2.40888e-05	0.000627719
ANXA4	6288.92	1.94539	0.00010038	0.00184142
AOC1	45.381	2.82089	0.00224055	0.0181225
AOX1	3129.33	6.03096	1.12872e-11	3.75812e-09
APLN	18.2957	-1.64901	0.00277794	0.02104
APLP2	14303.3	1.3	0.000185434	0.00288383
APOBEC3B	140.766	-1.40157	7.47014e-05	0.00146049
APOC1	284.657	1.32143	0.00587787	0.0359642
APOD	2389.09	3.55596	1.61937e-14	1.62941e-11
APOE	4540.23	1.64789	0.000757449	0.00822164
APOL1	788.766	1.19826	0.00746282	0.0429757
APOL2	1029.2	1.40767	0.00104349	0.0103546
AQP3	992.619	4.26927	5.42707e-09	7.23274e-07
AQP5	15.8657	-2.40661	0.00119424	0.0114279
AR	1876.16	-1.33895	0.000270414	0.00379501
ARG2	467.628	3.543	1.89389e-09	3.09859e-07
ARHGAP29	1530.82	1.16059	0.00851102	0.0472224
ARHGEF19	342.085	-1.08641	2.26471e-06	9.63662e-05
ARHGEF28	877.498	1.1165	0.00279663	0.0211338
ARHGEF38	201.26	2.84119	3.55795e-07	2.26818e-05
ARHGEF5	518.869	1.48201	4.1642e-05	0.00092387
ARID5B	3284.58	1.8432	1.25918e-05	0.000385102
ARL14EPP1	4.33472	-2.12203	0.000195324	0.00298458
ARL17A	16.1544	-2.03646	0.00499523	0.0319112
ARMC12	11.8935	1.55334	0.00417719	0.0280954
ARMCX4	722.118	-1.61039	1.77552e-08	1.88056e-06
ARMH4	287.263	-1.05356	1.09808e-05	0.000351317
ARNT2	780.109	-1.2388	0.000119112	0.00208009
ARNT2-DT	18.7187	-2.19921	5.50916e-06	0.000200845
ARRDC2	72.2323	1.04753	0.0032937	0.0237486
ARSB	1421.34	1.70063	0.000632197	0.00719996
ARSI	16.8129	-1.99479	0.00295048	0.0220072
ARSL	900.066	2.0766	0.000627078	0.00714571
ASAH2	16.0766	-1.06424	0.00442392	0.0292275
ASCL1	7.51948	-3.35681	2.89309e-05	0.000713486
ASIC2	145.619	-4.32603	1.03616e-05	0.000336316
ASIP	16.3485	1.81233	0.00257532	0.0199261
ASLP1	17.6434	-1.37691	0.000790018	0.00846556
ASPG	23.2689	1.95372	6.32184e-05	0.0012912
ASPN	299.851	-1.02102	0.0031973	0.0232807
ASS1P1	10.6731	-1.46156	0.00499663	0.0319112
ASS1P2	12.9866	-1.61185	8.35205e-07	4.38842e-05
ASTN1	96.8891	-1.86642	4.20174e-07	2.62596e-05
ATF3	410.916	2.70738	0.00214843	0.0175983
ATG9B	67.152	3.56385	7.72866e-09	9.31327e-07
ATOH8	103.77	2.62949	8.57723e-08	6.82246e-06
ATP11A	3645.1	1.07595	1.62519e-05	0.000471939
ATP12A	3.42194	3.48606	0.00632905	0.0380196
ATP13A4	191.773	2.978	3.90298e-05	0.000880534
ATP1A1	8274.2	1.05646	0.00605196	0.0367944
ATP1A2	681.027	-4.11765	3.61653e-08	3.35387e-06
ATP1A4	6.82944	-3.33584	0.00076334	0.00825885
ATP2B1	2126.77	-1.03146	2.95787e-10	6.47002e-08
ATP2B3	83.4728	1.82786	0.00927254	0.0498926
ATP2C2	970.568	2.88999	5.94997e-06	0.000214907
ATP6V0CP4	12.0289	2.23255	0.00561021	0.0347491
ATP6V1A	2921.98	2.05448	7.20479e-06	0.00024942
ATP6V1C2	664.663	2.34278	0.000117669	0.0020673
ATP6V1G1	1203	1.03743	0.00159027	0.0141229
ATP8A2	1240.42	1.20398	0.00770532	0.0439269
AUNIP	40.5382	-1.24018	0.00270677	0.0206408
AVIL	493.173	1.48477	2.39937e-05	0.000627719
AVPI1	34.9484	1.33506	0.000302822	0.00412673
B3GALT5	19.3971	-1.19821	0.00067419	0.00754163
B3GNT2	382.722	1.26125	5.75638e-06	0.000208723
B3GNT3	28.8082	4.12607	1.0294e-07	7.90672e-06
B4GALNT1	42.3758	1.41066	0.000526123	0.00621344
B4GALNT2	107.459	6.96354	1.5579e-09	2.6126e-07
B4GALNT3	5202.91	2.33039	0.000117844	0.00206757
B4GALT1	3212.64	-1.04208	0.000312355	0.00421266
B4GALT4	750.396	1.18655	0.000282748	0.00393749
B9D1	336.997	-1.00435	2.37182e-05	0.000624745
BAALC	22.5064	1.46926	0.000928541	0.00952879
BACE2	1445.86	1.22816	3.72019e-05	0.000851115
BAIAP2L1	432.315	1.01615	0.00177055	0.0152528
BAIAP2L2	166.936	3.58303	3.75477e-13	1.98845e-10
BCHE	36.1018	-2.59259	2.55857e-06	0.000105294
BCL11A	77.3173	-1.21424	0.00159005	0.0141229
BCL2L10	18.82	2.76618	0.00101151	0.0101171
BCL6	391.199	2.28356	3.8027e-08	3.49431e-06
BCO1	201.987	2.64535	2.06953e-05	0.0005628
BDKRB1	3.10033	2.7731	0.00862875	0.0475502
BDKRB2	58.4625	1.05196	0.00447357	0.0295265
BEND5	80.012	-1.24296	3.85382e-06	0.000148291
BEX1	51.7484	-2.71377	9.38237e-06	0.000310513
BEX2	68.5621	-1.77929	3.81329e-05	0.000865269
BFSP1	35.5961	-1.41592	0.000742316	0.00810987
BHLHA15	11.2166	1.62801	0.00533824	0.0335918
BHLHE41	221.342	-1.63845	5.25442e-05	0.0011154
BICDL1	526.931	2.09999	2.62052e-05	0.000662505
BICDL2	82.7848	1.28711	0.00162154	0.0143271
BLM	292.537	-1.09224	0.0019978	0.0166528
BMAL1	478.831	1.23873	2.98281e-08	2.89981e-06
BMF	35.8998	-1.55255	0.000200274	0.00303259
BMP3	7.4089	-3.4568	0.00194378	0.0163874
BMP4	188.389	1.35605	0.000481394	0.00579802
BMP7	92.955	-3.74071	6.1001e-06	0.000219212
BMPER	220.671	2.60418	0.00029705	0.00408321
BMPR1B	807.077	-1.63885	0.000919674	0.00944871
BNIP3	587.368	1.55903	1.97843e-08	2.0629e-06
BPIFA2	4.8573	4.04191	0.000308771	0.00417868
BRAFP1	18.3687	-1.25704	0.000688318	0.00765711
BRI3	367.098	1.04781	2.69406e-05	0.000676002
BRINP1	197.639	3.18442	6.0204e-05	0.00124261
BRSK1	217.857	-1.1757	1.79216e-05	0.000503005
BRSK2	15.5668	1.772	0.00127584	0.0119419
BSPRY	240.481	1.15606	0.000136756	0.00228388
BST1	171.472	1.19973	4.87667e-07	2.91211e-05
BST2	233.11	-1.34807	0.00417438	0.0280954
BTBD3	1714.22	1.39978	7.20608e-06	0.00024942
BTG2	153.752	2.14246	0.00054249	0.00637307
BUB1B	982.47	-1.47656	0.00470189	0.0306062
BVES	67.0128	1.40469	3.33949e-08	3.18502e-06
BVES-AS1	5.68912	1.8493	0.00183993	0.0157026
C10orf82	12.3626	-3.15399	1.66099e-05	0.000480254
C11orf52	228.482	2.46598	8.60212e-09	1.00645e-06
C11orf54	146.58	1.08191	0.001055	0.0104379
C11orf96	249.01	2.18869	0.00133845	0.0123328
C12orf75	350.985	1.62104	0.00564398	0.0348938
C1GALT1P2	15.395	5.72828	0.000103566	0.00187931
C1orf116	28.9501	2.91203	0.000432822	0.00535853
C1orf21	359.197	1.25467	0.000131557	0.00222289
C1R	8214.63	1.8061	2.32674e-06	9.81619e-05
C1S	15885.2	1.19906	4.78925e-05	0.00103712
C20orf141	3.12326	3.33553	0.00663808	0.0393243
C20orf27	250.78	1.0323	0.000191573	0.00295192
C2CD4A	246.011	7.91553	2.58853e-15	3.06421e-12
C2CD4B	54.4336	5.80319	1.39154e-11	4.3082e-09
C4A	41.7014	5.41679	9.39267e-06	0.000310513
C4BPA	1570.89	6.03458	4.70577e-14	3.64226e-11
C4BPB	6.05112	3.41704	0.00142509	0.0129357
C6orf118	73.9834	-1.72165	0.00165331	0.0145416
C6orf141	146.007	2.19649	7.28384e-06	0.000250564
C7	137.755	1.96995	4.64262e-06	0.000173982
C8B	15.66	3.40588	0.00384325	0.0264687
C9orf152	221.988	2.00088	8.24613e-06	0.000278899
CA11	378.695	-1.83068	0.000321736	0.00428783
CAB39L	211.769	2.06994	0.00213898	0.0175407
CACHD1	969.228	-1.07297	8.61671e-08	6.82688e-06
CACNA1I	9.96632	-2.32625	0.000881131	0.00918274
CACNA2D2	75.6313	-2.67695	4.34917e-09	6.03604e-07
CACNB2	412.281	1.23111	9.86596e-05	0.00181816
CADM1	1671.94	-1.6202	1.72686e-09	2.87201e-07
CADPS	115.942	-3.17572	1.5377e-05	0.000449778
CALHM2	125.204	1.12443	3.51896e-05	0.000821996
CAMK4	64.9175	-1.35691	0.00110283	0.0107787
CAND2	68.7899	-1.70836	0.000261972	0.0037074
CAP1	3943.52	1.05408	2.82626e-06	0.000114438
CAPG	656.994	1.05678	0.00394015	0.0269365
CAPN8	98.6506	7.10381	6.37713e-12	2.29167e-09
CAPS2	110.579	-1.40734	3.47082e-08	3.25802e-06
CAPZA2	3196.5	1.52575	1.04e-05	0.000337021
CARD6	243.837	1.05729	1.36361e-05	0.000409809
CARMN	30.5369	-1.1403	0.00117329	0.0112757
CAST	4381.55	1.00206	2.82655e-09	4.18246e-07
CASZ1	481.27	1.32317	2.07747e-05	0.000564198
CATSPER1	31.2223	1.69627	0.00731184	0.0423807
CBFA2T3	40.4717	-1.50462	0.000124981	0.00214418
CBLN1	141.617	-3.90788	1.71987e-06	7.77768e-05
CBLN4	120.208	-2.79618	0.00011448	0.00202265
CBX2	141.27	-1.02806	0.00561214	0.0347504
CCBE1	346.351	-2.51921	6.19323e-06	0.000222161
CCDC136	230.522	-1.38095	0.0020008	0.0166656
CCDC150	102.463	-1.00788	0.00218265	0.0177828
CCDC71L	65.7888	1.86898	7.66836e-05	0.00148812
CCDC74A	257.979	-1.31832	2.08518e-05	0.000565528
CCDC74B	219.432	-1.85605	7.59486e-06	0.000259049
CCDC85A	37.3099	1.02804	0.006404	0.0383326
CCL13	16.4986	2.74469	0.00746102	0.0429757
CCL23	2.58833	4.34387	0.00198324	0.0165811
CCN3	326.984	2.78015	6.37873e-05	0.00129688
CCN6	8.24265	1.93846	0.0055834	0.0346388
CCNB2	115.929	-1.26462	0.00413193	0.0279405
CCR7	62.8342	1.18341	0.00204395	0.0169548
CD14	247.699	1.1058	0.00235936	0.0188487
CD177	13.2146	3.04015	0.000191258	0.00294932
CD22	40.5827	-2.35906	0.000758485	0.00822844
CD300C	25.8537	2.23186	0.00021897	0.00324728
CD36	2467.79	4.07363	1.49103e-10	3.70439e-08
CD44	7259.49	1.94524	2.09474e-09	3.3456e-07
CD55	7651.47	4.00138	8.7903e-10	1.56545e-07
CD58	227.656	1.15053	0.00129605	0.012072
CD9	1405.04	1.51926	0.000119049	0.00208009
CD99	176.394	-2.35102	0.00126524	0.0118712
CDA	135.767	3.04205	4.16853e-05	0.00092387
CDC42SE2	309.917	1.40319	2.13084e-07	1.46853e-05
CDCA7L	172.621	-1.11257	0.000335848	0.00441162
CDH1	6202.17	1.39853	0.00095085	0.00967386
CDH15	8.69563	-1.66705	0.00856262	0.0474034
CDH16	81.9394	4.15849	7.51896e-07	4.00538e-05
CDH17	13.7378	-1.23408	0.0092967	0.0499431
CDH2	856.573	-2.04533	2.22846e-05	0.000597143
CDH24	285.919	-1.25463	0.0016141	0.0142716
CDH6	152.759	-1.98605	0.000104481	0.0018908
CDK2AP2	478.847	1.04141	0.000281816	0.00393019
CDKL2	53.1472	2.2583	0.00257013	0.0199088
CDKN1A	511.515	1.51712	0.00270417	0.0206288
CDKN2B	44.6999	1.91325	0.00281112	0.0211865
CDKN2D	17.2167	1.0678	0.0013005	0.0120827
CDR2L	169.881	1.00137	0.00231642	0.0185807
CDS1	313.565	1.18317	0.00651237	0.0387622
CDYL2	1101.31	3.13538	5.84066e-09	7.6323e-07
CEACAM1	1233.03	1.6195	1.37035e-05	0.000410984
CEACAM19	17.2407	-0.998855	0.00430603	0.0286689
CEBPB	642.423	1.60621	0.000168812	0.00266863
CEBPD	147.917	3.41656	4.84772e-11	1.39365e-08
CEMIP	2756.84	1.63258	0.00198041	0.0165712
CENPH	53.5449	-1.06522	0.00400311	0.0272618
CENPK	185.321	-1.13902	0.00261382	0.0201243
CER1	11.5997	-2.05406	2.10084e-05	0.00056748
CEROX1	117.148	-1.22448	0.000593185	0.00682519
CFH	54.0872	-1.91874	3.38227e-05	0.000797012
CFL2	1000.22	1.06883	0.001489	0.0133652
CGN	809.391	1.36396	0.000130506	0.00220884
CGNL1	2903.01	-1.70782	4.72855e-07	2.87484e-05
CHAC1	4.90765	-2.1246	0.000400618	0.00504193
CHD5	18.211	-2.3367	3.7464e-05	0.000853823
CHGB	14.4694	-1.93693	0.0083622	0.0465636
CHI3L1	239.603	3.94575	4.45347e-05	0.000977387
CHI3L2	154.764	7.10584	2.51732e-08	2.53556e-06
CHMP4C	142.098	1.15486	8.43048e-05	0.00160658
CHMP5P1	5.51381	-1.69942	0.00203606	0.0169034
CHN1	223.139	-1.20866	4.79946e-06	0.000178529
CHODL	26.0081	2.47112	0.000944361	0.00961757
CHP2	8.15125	2.64364	0.00356565	0.0251156
CHST2	149.053	1.62149	0.000912145	0.00940851
CHST7	78.4093	1.71004	0.000125289	0.00214581
CHSY3	249.326	1.02303	0.000968016	0.00978912
CIAPIN1P	24.2602	-2.59978	4.06879e-06	0.000155076
CIART	74.8718	-1.61721	0.00108842	0.0106794
CILP	440.009	1.76493	0.00164008	0.0144442
CITED2	1380.02	3.43706	9.61884e-16	1.61308e-12
CLCF1	182.058	1.12256	0.00615575	0.0372669
CLCNKA	28.7069	-1.76941	0.00163389	0.0144086
CLCNKB	9.11188	-2.26384	3.28859e-06	0.00012951
CLDN3	283.602	1.55961	5.42203e-07	3.14447e-05
CLDN4	354.421	3.03075	2.95588e-06	0.00011896
CLDN8	2.14455	4.07055	0.0019876	0.0166038
CLEC12A	21.6798	1.91997	0.00237421	0.0189597
CLEC2B	275.498	1.02454	0.00280702	0.0211777
CLEC3B	86.1247	2.33604	1.81234e-05	0.000506549
CLEC4E	167.015	4.66529	0.000156364	0.0025234
CLIC6	17.8332	-1.46827	0.00136304	0.0125193
CLUL1	27.1943	-1.91453	0.006186	0.0373723
CNIH3	8.52027	-1.55063	0.0013936	0.0127187
CNKSR2	338.294	1.40256	0.00801967	0.0452193
CNKSR3	46.8417	1.23794	0.00818729	0.0458689
CNNM1	21.2331	-1.32528	0.0028243	0.0212438
CNPPD1	500.163	1.0456	1.1644e-05	0.000368433
CNTN1	1531.78	-2.86535	4.16333e-09	5.81826e-07
COL17A1	617.938	2.84791	5.48926e-05	0.0011523
COL27A1	3531.68	-2.03647	4.1798e-08	3.80608e-06
COL2A1	13.7508	-1.28815	0.00352478	0.0248974
COL4A2-AS2	96.8618	1.00204	0.00784569	0.0445211
COL4A3	142.15	1.19435	1.74926e-05	0.000497206
COL4A4	110.781	1.90963	3.23752e-05	0.000771029
COL4A6	240.29	2.01824	4.03054e-06	0.00015391
COL6A6	538.063	-1.83098	0.0049325	0.0316624
COL9A2	479.557	-2.35706	3.13964e-05	0.000752169
COLEC11	260.203	1.94106	9.40455e-05	0.00175076
COMP	2797.97	8.94766	2.08234e-13	1.19729e-10
CORO2A	262.599	1.85051	1.70341e-05	0.000486232
COX17	57.0645	1.07811	3.85837e-05	0.000874389
CP	9455.71	2.62695	0.000425257	0.00528764
CPA4	27.2018	6.5593	0.000487962	0.00585903
CPEB2	181.485	1.09355	3.63308e-09	5.18525e-07
CPEB4	496.159	1.3174	0.00122745	0.011635
CPM	2364.28	-2.16777	0.000663988	0.00745652
CPP	146.831	3.16435	3.26029e-05	0.000774616
CR2	15.6696	-2.549	0.00249843	0.0195671
CRABP2	1120.78	-2.41543	0.000403464	0.0050714
CRB1	6.11237	-1.67603	0.000654577	0.0073838
CRB2	20.481	3.10151	0.000549678	0.00644998
CREB3L1	1642.09	1.39905	0.00486471	0.0313071
CRIP3	23.153	-1.15111	0.000472597	0.00572235
CRISP2	37.4329	2.49924	0.000151092	0.00246201
CRISP3	1356.58	5.13737	6.56901e-12	2.31921e-09
CRISPLD1	335.031	-2.2819	2.65511e-05	0.000668345
CRISPLD2	3777.97	1.68082	0.00167744	0.014684
CRTAC1	9.42317	-2.42372	0.00271503	0.020696
CRYAB	2301.19	3.95556	2.69913e-14	2.36162e-11
CRYBG1	980.54	1.02643	6.66363e-07	3.65392e-05
CSMD3	75.2689	-4.20836	1.58461e-11	4.83161e-09
CSPG5	5.6398	-1.47651	0.00426137	0.0284772
CSRNP3	145.35	-1.61216	0.000127054	0.0021705
CST4	45.3951	2.43311	0.0020564	0.0170371
CSTB	2664.57	1.22114	1.1755e-05	0.00036962
CTAGE14P	143.905	-2.38006	9.95293e-05	0.00183179
CTAGE9	115.631	1.11698	0.00128818	0.0120342
CTDSPL	427.864	1.16559	0.002517	0.0196478
CTH	318.648	1.19002	0.00111216	0.0108452
CTSA	4531.2	1.26438	5.00935e-05	0.00107243
CTSL	2240.16	1.24596	0.00281202	0.0211865
CTSW	820.527	2.12769	0.000237987	0.00343423
CUBN	1487.4	-1.11753	0.000488784	0.00586191
CUX2	63.5862	-2.96791	0.000100961	0.00184872
CX3CL1	40.2045	-1.30506	0.00899979	0.0489095
CXCL11	9.79339	-2.191	0.00414683	0.0279775
CXCL13	43.0007	3.91858	3.21465e-05	0.000766487
CXCL14	1168.49	8.53128	7.35347e-10	1.3702e-07
CXXC4	4.3988	-1.68161	0.0032548	0.023561
CYP2C18	24.8665	5.54515	5.49473e-07	3.16837e-05
CYP2C9	323.848	5.93173	2.02143e-09	3.25435e-07
CYP3A5	869.755	3.57402	1.57934e-06	7.32319e-05
CYP4A11	4.85383	2.4321	0.00257641	0.0199261
CYP4B1	133.374	4.43344	2.41325e-14	2.20747e-11
CYP4F23P	2.95515	-3.64766	0.000899151	0.00931267
CYP4Z2P	6.64362	4.50725	0.000153277	0.00248929
CYP8B1	10.2489	1.80895	0.000481439	0.00579802
CYS1	6.67446	3.99814	0.0025808	0.019931
DACH1	392.186	-1.63572	3.69411e-07	2.33774e-05
DACT2	86.0236	-2.54214	9.18141e-05	0.00171716
DAPK1	2660.38	1.5674	1.21139e-05	0.000375046
DBNDD2	56.1742	1.26328	0.00147727	0.0132954
DBP	496.775	-1.43873	0.00141658	0.0128759
DCHS2	182.306	-1.48946	0.0060567	0.036801
DCPS	283.985	1.15006	0.00215111	0.0176043
DCTPP1	474.685	1.10033	0.000127669	0.00217545
DDI1	8.59406	-2.6337	6.63353e-07	3.64735e-05
DDI2	887.339	1.06961	3.34236e-05	0.00078853
DDIT4L	12.0079	-1.46111	0.0023873	0.0190115
DDX52	261.824	2.08778	0.00017557	0.00275169
DEFB1	348.788	3.46285	6.38362e-07	3.56844e-05
DEGS1	1098.05	1.23923	3.88115e-05	0.000877548
DENND2A	984.968	-1.22609	0.00221579	0.0179656
DENND3	504.954	1.1164	6.64072e-10	1.27274e-07
DEPDC1P2	6.65208	-1.43094	0.00239281	0.0190403
DEPP1	612.318	4.44155	4.22358e-12	1.57399e-09
DEPTOR	2440.79	2.24631	7.94543e-06	0.000270091
DEPTOR-AS1	6.50881	2.32247	0.00102884	0.0102579
DERA	736.522	1.37137	1.14642e-06	5.72468e-05
DES	182.132	2.43671	0.00120966	0.0115288
DGUOK-AS1	6.8374	3.21612	0.000785065	0.00842595
DHCR7	427.893	-1.12835	0.00245456	0.0193797
DHRS3	1886.52	2.03115	0.00163817	0.0144337
DIO3	37.9404	2.36491	0.00848998	0.0471577
DIPK1A	206.851	1.28944	0.00280294	0.0211735
DISP3	12.8067	-2.08616	0.00151641	0.0135869
DKK1	1057.68	7.38765	6.64942e-29	6.69064e-25
DLC1	1933.08	-1.05854	4.63486e-06	0.000173982
DLGAP1	1139.34	3.46466	5.2157e-10	1.04961e-07
DMRTA1	79.0934	2.91196	1.17054e-11	3.75822e-09
DNAJB3	6.9537	5.17751	1.47382e-05	0.00043425
DNAJC6	271.617	3.08631	3.93152e-06	0.000150701
DNER	187.824	3.57884	0.00018777	0.00290445
DNM1	2072.11	-1.33911	0.00132048	0.0121896
DOK2	96.5312	1.28875	0.00849743	0.0471731
DOK5	71.4579	3.29069	0.000106755	0.00191987
DOK7	103.408	-1.65339	9.65013e-06	0.000316801
DPH3	87.459	1.00624	0.00649846	0.0387252
DPP10	36.7757	-4.01232	3.55332e-08	3.31051e-06
DPP4	6053.04	4.83541	2.18086e-07	1.48772e-05
DPP6	799.349	-1.44488	0.000972092	0.00981611
DPYSL2	3836.98	1.19111	6.03056e-05	0.00124343
DPYSL4	175.958	-1.46288	8.22146e-05	0.00157871
DSC2	855.291	1.96845	0.000369049	0.0047516
DSCC1	80.9072	-1.16708	0.000147675	0.00242373
DSP	9336.53	1.02175	0.00559718	0.0346897
DUOX2	213.929	1.61859	0.00316077	0.0230992
DUOXA2	28.4236	1.88287	0.00900547	0.0489271
DUSP1	3176.82	2.48391	0.00130912	0.0121014
DUSP15	53.154	-1.32989	0.000259788	0.00368947
DUSP23	124.987	1.89744	6.7867e-10	1.28845e-07
DUSP5	127.954	2.08971	0.001752	0.0151469
DUSP7	314.024	-1.11342	0.000366675	0.00472405
DYNLT3	645.582	2.56796	2.96394e-09	4.35375e-07
DYNLT3P1	16.4377	2.88131	5.29499e-07	3.08859e-05
DYSF	6052.24	2.6535	1.58954e-05	0.000462967
ECEL1	24.4386	-2.82506	4.19743e-06	0.000159677
ECM1	6396.19	-1.42756	0.00258062	0.019931
ECRG4	3.75342	-2.00513	0.00424145	0.0283949
EDN1	200.865	2.17499	0.0002321	0.00336997
EDN2	9.53402	-3.94985	1.20048e-05	0.000373392
EDNRB	899.002	2.89942	2.51903e-05	0.000642496
EEF1GP1	3.55575	-1.77722	0.00289013	0.0216453
EFCC1	28.0229	-1.19744	0.00534132	0.0335968
EFNA1	473.508	2.46034	2.15908e-07	1.47787e-05
EGFEM1P	13.2841	-5.59912	3.37375e-10	7.14666e-08
EGLN3	125.711	-1.31444	0.00090125	0.0093296
EIF3CL	186.396	4.32244	1.46757e-05	0.000433042
EIF4E3	81.4969	1.81895	0.000359611	0.0046539
ELF5	6.72115	4.51676	0.00283965	0.0213308
ELK4	3379.64	1.16058	0.000157019	0.00252991
ELL2	366.021	2.02404	5.06915e-07	2.9828e-05
ELL2P1	12.0978	1.82093	0.00333605	0.0239511
ELMOD1	32.9059	-1.62536	8.76153e-07	4.52491e-05
ELOVL3	2.99527	3.92208	0.00260825	0.0201015
ELOVL7	123.817	1.82471	0.00258372	0.0199367
EMILIN2	2298.8	2.23216	2.80275e-12	1.12805e-09
EMP1	1061.94	1.39309	0.000967898	0.00978912
EMP3	1594.09	1.16603	0.00220804	0.017923
EMX2OS	17.6795	-1.17896	0.000112329	0.00199516
ENAM	3.13462	3.37479	0.00549672	0.0342677
ENC1	750.4	-1.84187	0.000384345	0.0048922
ENDOD1	346.379	1.02843	0.000242121	0.00348032
ENDOG	6.82908	1.79419	0.00507704	0.0323426
ENPP3	1010.51	1.50959	4.64378e-07	2.84047e-05
ENSG00000175604	18.3032	1.96124	0.000331325	0.00436646
ENSG00000177452	11.816	-1.77	0.000563753	0.00658072
ENSG00000177699	6.96701	-3.22514	0.00401228	0.0272912
ENSG00000178836	3.80153	4.90017	0.000567056	0.00660003
ENSG00000204584	34.5318	1.06909	0.00405261	0.0275058
ENSG00000205018	60.8548	-1.24197	2.3578e-06	9.92646e-05
ENSG00000205414	3.11295	-2.61308	0.0034239	0.024373
ENSG00000205622	4.41426	3.90421	0.00432078	0.0287348
ENSG00000212664	51.3166	-1.19456	0.000137965	0.00229835
ENSG00000213252	19.0193	-1.85169	1.03623e-09	1.81331e-07
ENSG00000213514	27.9614	1.54009	7.07154e-05	0.00140759
ENSG00000214999	10.2056	4.66992	0.000527106	0.0062141
ENSG00000215380	5.92733	-2.50371	7.85667e-05	0.00152173
ENSG00000215450	12.2021	-2.47414	3.61674e-05	0.000832631
ENSG00000226465	5.8712	-1.52421	0.00650598	0.0387471
ENSG00000227158	9.67589	1.83956	0.00518321	0.03277
ENSG00000228157	12.8468	-2.08307	0.000848448	0.00894404
ENSG00000228835	7.19	-1.87963	0.000659635	0.00742006
ENSG00000229060	6.72579	4.53218	4.3134e-05	0.000951786
ENSG00000229863	4.05594	-1.80947	0.00364453	0.0254661
ENSG00000230490	17.2028	-2.23291	2.12633e-06	9.16279e-05
ENSG00000231043	24.3979	-1.48742	5.71915e-08	4.89754e-06
ENSG00000231362	2.72912	-2.70673	0.00329993	0.0237765
ENSG00000232450	8.99824	-1.00945	0.00711892	0.041513
ENSG00000233114	6.64535	-1.97344	0.00536297	0.0336738
ENSG00000235020	4.85624	3.47858	0.00250851	0.0196196
ENSG00000236015	14.9213	-1.29059	0.00247889	0.0194788
ENSG00000236942	16.7057	1.45588	8.31657e-05	0.00159241
ENSG00000237861	3.16025	-1.81377	0.00729978	0.0423404
ENSG00000239268	7.38067	-1.88767	0.00124372	0.0117285
ENSG00000240776	10.1482	4.07622	3.00379e-05	0.000730051
ENSG00000241889	227.423	4.16441	4.89421e-10	9.94859e-08
ENSG00000242431	3.4958	-1.83798	0.00520821	0.0329074
ENSG00000247121	9.97253	-1.21639	0.00463948	0.030274
ENSG00000249207	5.36878	-1.88762	0.00249663	0.0195647
ENSG00000249379	10.9561	-2.66455	1.82429e-07	1.27923e-05
ENSG00000250602	20.2738	1.21253	0.00459072	0.0300434
ENSG00000251199	4.21585	-2.66953	0.0013432	0.0123616
ENSG00000251648	35.228	-1.03433	0.0083138	0.0463968
ENSG00000253348	2.86638	3.22929	0.00739407	0.042709
ENSG00000253415	21.3475	-1.38749	9.85857e-05	0.00181816
ENSG00000253509	5.56094	-2.72503	2.00569e-05	0.000549898
ENSG00000256006	12.4577	3.29564	0.000336648	0.00441924
ENSG00000259477	12.0217	-1.61348	0.00711236	0.0414965
ENSG00000259619	4.63088	-1.57608	0.0043479	0.028877
ENSG00000259683	675.771	1.23705	0.000775443	0.00834708
ENSG00000266910	14.4798	-1.08327	0.0081684	0.0457758
ENSG00000267774	2.12646	-3.63767	0.00100163	0.0100482
ENSG00000268362	10.1736	-1.16113	0.0023772	0.0189686
ENSG00000268442	51.4799	-1.50538	0.000262774	0.00371352
ENSG00000268723	6.63308	-2.13354	0.00453334	0.0297922
ENSG00000270442	8.82498	-2.38934	3.52402e-07	2.25851e-05
ENSG00000270919	3.85086	4.29185	0.00893907	0.0486715
ENSG00000271034	36.8501	6.4519	1.68121e-07	1.19974e-05
ENSG00000271426	6.85868	2.7445	0.00537562	0.0337216
ENSG00000272078	3.05383	3.28163	0.00784523	0.0445211
ENSG00000272625	32.3853	2.0766	4.00348e-05	0.000896174
ENSG00000273957	3.91621	-2.17152	0.00466548	0.0304042
ENSG00000274845	44.9965	2.08938	2.16503e-06	9.27001e-05
ENSG00000275888	5.97286	1.99076	0.00919983	0.049648
ENSG00000276393	27.4365	-1.1316	0.00113154	0.0109741
ENSG00000280071	10.2453	1.40843	0.00749415	0.04304
ENSG00000280138	35.1826	1.64343	0.00110581	0.0108026
ENSG00000285781	236.568	1.20117	5.97665e-08	5.07486e-06
ENSG00000286502	65.5982	-1.31565	0.00348944	0.0247085
ENSG00000287134	2.3946	-2.87801	0.00103827	0.0103164
ENSG00000288542	21.7747	2.70585	2.36753e-06	9.94658e-05
ENSG00000290835	52.3962	-1.09286	0.00147196	0.0132595
ENTPD5	545.502	1.02767	0.000171194	0.00269972
EPAS1	3833.61	1.66125	0.000153557	0.00249007
EPHA5	196.758	-2.36432	0.0071878	0.0418419
EPHA7	376.466	-2.30191	0.0013693	0.0125654
EPHB2	392.964	-1.15288	0.000894149	0.00928475
EPS8	4104.8	1.46345	3.82938e-06	0.000147912
EPS8L2	722.767	1.28481	1.02652e-05	0.000333727
EPS8L3	48.4237	2.29522	3.01429e-05	0.000731719
ERBB3	7488.78	1.61687	0.000105917	0.00190993
ERICH3	230.333	-1.22573	0.00311981	0.0229303
ERICH4	6.20591	-2.15305	0.00430759	0.0286689
ERN1	1479.66	1.38097	0.00332178	0.0238741
ERP27	101.701	2.29078	0.000814494	0.00867242
ESR1	10419.3	-1.59866	2.47451e-06	0.000102887
ESR2	78.435	2.26988	0.000117233	0.00206223
ESRP2	444.294	1.05744	0.000750802	0.00817595
ETS2	2292.63	1.27358	2.78428e-06	0.000113193
ETV1	702.095	-2.13373	1.8044e-15	2.55438e-12
EVA1C	392.685	1.88746	5.48155e-13	2.75777e-10
EVC	4308.65	1.04603	0.00927738	0.0498926
EYA2	1612.94	-1.48499	2.07686e-06	9.08351e-05
EYA4	40.3427	-2.44263	3.03329e-05	0.000734304
EYS	22.4423	1.14172	0.00145019	0.0130986
EZR	6389.37	1.44648	0.000340576	0.00445918
F2	61.3424	3.15853	3.62031e-05	0.000832631
F2RL1	400.224	1.85422	2.82009e-05	0.000700636
FA2H	87.8102	2.39673	0.00281442	0.0211966
FABP5	222.978	1.45615	1.26615e-06	6.13569e-05
FAHD2P1	8.69242	4.889	8.44654e-05	0.00160713
FAIM2	27.7517	-1.51387	0.00323923	0.0234805
FAM107A	16.1907	1.54612	0.00125164	0.0117756
FAM107B	458.491	1.03489	0.000158113	0.00254346
FAM110C	39.8241	2.93659	5.48013e-05	0.0011523
FAM149A	747.508	2.445	4.63508e-08	4.11522e-06
FAM151A	20.9154	1.14122	0.00193124	0.0163086
FAM169BP	15.1836	3.76217	0.00111623	0.0108751
FAM177A1	1137.5	2.05315	2.06561e-06	9.07604e-05
FAM222A	31.3569	-2.19644	0.000185748	0.00288414
FAM241A	19.1959	1.43718	0.000165161	0.00263159
FAM3C	1156.06	1.81672	1.9981e-05	0.000548565
FAM3C2P	261.289	1.7755	0.000224267	0.0033015
FAM72A	47.0912	-1.01919	0.001796	0.0154193
FAM83B	50.1422	1.71524	0.00251424	0.0196339
FAM83E	116.869	1.85301	1.56701e-08	1.67736e-06
FAM89A	11.7823	3.10917	0.00112071	0.0108942
FAM90A20P	210.831	-1.68583	4.51841e-05	0.000988352
FANCA	1010.89	-1.14885	0.0021248	0.0174742
FANCB	140.989	-1.39372	0.000863924	0.00905614
FANCD2	1544.24	-1.05057	0.0022564	0.0182361
FANCI	1925.54	-1.09196	0.00397967	0.0271389
FAT2	239.987	-1.93624	0.000254193	0.00362793
FBLN2	2611.47	1.55076	0.00263785	0.0202225
FBN2	2767.56	-2.188	7.43984e-05	0.00146049
FBN3	108.84	-2.89179	0.000128777	0.00218986
FBXO32	680.063	3.00055	4.5384e-10	9.31946e-08
FCER1G	247.482	1.34964	0.00155493	0.0138703
FCGR1A	48.5532	1.38047	0.00213297	0.0175117
FCGR1BP	12.9838	1.94874	0.00174066	0.0151204
FCRL3	10.4359	-2.46549	0.00661994	0.03924
FERMT2	2284.63	1.3391	0.00179876	0.0154363
FGB	36.0132	4.37622	0.00291195	0.0217602
FGD4	1554.62	1.68496	2.72304e-05	0.000681573
FGF10	392.299	1.22003	0.00931826	0.0500322
FGF12	50.102	-1.6733	0.00248297	0.0194992
FGF7	136.39	2.92677	1.29674e-06	6.21322e-05
FGF9	105.051	-1.61276	0.00212009	0.0174426
FGG	3.96516	4.96229	0.000936702	0.00958275
FGL1	97.3809	1.84502	3.42945e-07	2.20493e-05
FHDC1	234.907	2.30587	1.11551e-07	8.40769e-06
FHOD3	535.264	-2.43254	1.15152e-10	2.89664e-08
FIGN	29.5518	-1.56386	0.00032511	0.00431279
FIGNL2	10.7695	-1.31987	0.00111233	0.0108452
FILIP1	115.782	3.5182	1.43693e-06	6.78796e-05
FJX1	410.43	-1.89215	0.0034495	0.0245041
FKBP1B	30.2136	1.2189	0.00316812	0.0231165
FKBP5	1389.79	3.06876	3.97083e-08	3.63223e-06
FLNB	16331.2	1.10349	0.000135557	0.0022714
FLNC	2031.75	-1.33353	0.00515185	0.0326333
FLRT1	98.6082	-2.20208	0.000148262	0.00242769
FLVCR2	189.735	1.0755	2.47629e-05	0.000638883
FMO1	22.5934	-3.68637	2.82622e-07	1.87088e-05
FMO3	15.7107	-1.92425	1.67309e-06	7.68705e-05
FMO5	187.893	1.3979	0.00146487	0.0132134
FMO6P	3.21162	-2.83333	0.00134341	0.0123616
FNDC1	916.98	-2.35523	7.56812e-05	0.00147293
FNDC5	36.3891	-1.4144	0.00757248	0.0433168
FNIP2	1114.1	1.2447	0.000440572	0.00541936
FOSL2	1677.43	2.01665	3.4033e-07	2.20187e-05
FOXL2	857.751	-1.74435	7.44524e-09	9.08049e-07
FOXL2NB	332.396	-1.10586	0.000262497	0.00371222
FOXN1	3.98925	3.76168	0.00194969	0.0164303
FOXO1	53.4334	1.66303	0.000569447	0.00661637
FOXO6	9.6656	-1.71547	0.00143412	0.0129825
FOXP1	88.2053	1.22257	0.00190019	0.0161076
FREM1	4871.74	-1.81593	2.87104e-05	0.000709604
FREM3	34.0211	-1.16011	0.00148836	0.0133652
FRG1	7.86498	4.76118	0.00329921	0.0237765
FRMD3	128.125	1.3288	0.00160998	0.0142416
FRMPD4	15.2882	-2.40686	0.000235873	0.0034149
FST	24.1285	2.78527	0.00105905	0.0104729
FTH1	3178.26	1.70754	7.62364e-12	2.60031e-09
FTH1P12	7.24561	2.02622	0.00227685	0.0183571
FTH1P2	23.2045	1.19239	0.000678449	0.00757754
FTH1P20	43.1997	1.10452	0.00920333	0.0496536
FTH1P8	39.0419	1.10905	0.00247742	0.0194749
FXYD2	13.5163	1.8656	0.00275642	0.0209321
FXYD3	4.35627	3.3313	0.00181326	0.0155409
FXYD5	845.098	1.5377	8.00414e-05	0.00154287
FZD9	4.15909	2.47621	0.00511538	0.0324919
G0S2	212.978	5.13667	6.86908e-09	8.63959e-07
GAB2	1321.03	1.21014	0.000133803	0.00224716
GABARAPL1	1687.16	2.78829	3.88198e-09	5.50148e-07
GABRA2	72.8817	2.75368	0.00276027	0.0209456
GABRB3	136.131	-1.44914	5.05528e-06	0.000187008
GABRG3	10.5216	-1.90981	0.000197526	0.00300909
GABRP	11630.1	2.28523	5.64316e-11	1.57726e-08
GADD45A	597.715	3.42399	6.86937e-08	5.64241e-06
GADD45B	236.283	2.03707	0.000593948	0.00682701
GAL	14.0332	2.1242	1.18253e-05	0.000370674
GALE	1108.58	1.05292	0.00391355	0.0267968
GALNT12	223.821	-2.06522	6.44939e-07	3.57627e-05
GALNT13	166.403	2.07568	2.43359e-06	0.000101816
GALNT15	90.7917	4.13942	1.46314e-07	1.06297e-05
GALNT16	19.5327	-1.49612	5.23923e-05	0.00111335
GALNT5	32.1786	-2.58906	0.00366903	0.0255663
GAPDHP71	11.153	-4.21197	1.20816e-05	0.000374863
GAREM1	202.843	1.03383	0.00586642	0.0359269
GARIN1A	74.8275	1.0394	4.33874e-05	0.000956328
GARIN1B	8.88136	2.34874	0.00268453	0.0205073
GAS1	250.27	2.36442	0.000223198	0.00329299
GAST	10.181	6.31836	4.47234e-08	4.01792e-06
GATA2	1413.67	-1.30155	3.61119e-05	0.000832436
GATA6	88.7829	3.16957	7.55835e-06	0.000258242
GBP2	3972.36	1.78779	0.000107107	0.00192277
GCKR	48.1039	2.47404	0.000333246	0.00438317
GCLC	3343.55	-1.89161	1.52621e-10	3.74555e-08
GCNT3	274.893	3.71233	7.00373e-12	2.43005e-09
GCNT4	114.387	2.06531	0.00104553	0.0103603
GDF15	123.172	3.23649	8.6218e-06	0.000288694
GDNF	5.42979	-2.4234	0.00321617	0.0233401
GDPD1	43.4287	-1.4217	5.57402e-05	0.00116704
GFRA2	31.9107	-2.67669	0.00127095	0.0119072
GGTLC5P	10.0796	6.3002	0.00640898	0.038351
GINS3	80.2626	1.19811	2.87382e-05	0.000709604
GINS4	44.2634	-1.30429	0.000173865	0.00272922
GJA4	134.059	-2.4302	2.02042e-07	1.40203e-05
GJB1	841.045	3.14104	2.92948e-18	8.42182e-15
GLA	755.024	-1.35343	2.56868e-05	0.000653504
GLB1L2	711.348	1.44743	0.00121547	0.0115651
GLI1	436.599	-1.84143	0.00850542	0.0472044
GLIPR1L1	16.0768	-1.22576	0.00109597	0.0107321
GLIS1	11.2664	-2.87391	0.00126541	0.0118712
GLRX	301.715	1.45846	0.00216831	0.0177029
GLT8D2	152.891	-1.64447	0.00386144	0.0265667
GLUL	9970.54	1.32098	0.000470353	0.00571236
GMNC	33.5952	-1.96827	0.000306918	0.00416398
GMNN	596.506	1.55271	0.000427647	0.00530904
GMPR	446.727	1.62511	0.00337309	0.0241566
GNA15	46.1504	1.38506	0.00228971	0.0184313
GNAI1	498.701	1.26767	3.99338e-05	0.000895906
GNG4	96.3885	1.84944	0.00262933	0.020188
GNL3LP1	17.1603	-1.02145	0.00341017	0.0243261
GNLY	3700.09	2.82261	2.04043e-05	0.000558662
GOLGA8M	12.878	2.52522	0.00771182	0.043939
GOLGA8S	5.47284	4.20833	0.00406259	0.027555
GOLGA8T	19.014	-5.0473	5.41988e-06	0.00019867
GOT1	522.441	1.0312	1.57865e-05	0.000461084
GPAT3	88.4527	-1.98511	1.70694e-07	1.21379e-05
GPBAR1	226.554	3.45691	2.52794e-09	3.91326e-07
GPC2	36.7384	-1.69235	6.11525e-08	5.14909e-06
GPD1L	2107.32	1.60132	0.000842626	0.00889664
GPR160	27.2164	1.90538	0.000611578	0.00700478
GPR37L1	8.08631	-1.58106	0.00320186	0.0232807
GPRC5B	594.861	1.23377	0.00193123	0.0163086
GPRC5C	164.953	1.46876	0.000725526	0.00795233
GPX1	160.289	1.30334	0.000107363	0.00192524
GPX3	6301.42	6.32366	1.00363e-08	1.15412e-06
GPX4	1841.78	1.02832	8.7038e-07	4.52491e-05
GRAMD1C	1557.01	3.86771	3.15382e-10	6.82446e-08
GRAMD2B	915.978	1.00755	0.00247254	0.0194509
GRB7	493.586	2.41728	7.52352e-07	4.00538e-05
GRHL1	149.168	1.35012	1.80367e-05	0.000505529
GRIA1	147.621	3.30208	3.48654e-10	7.30865e-08
GRIA3	355.824	1.39516	0.000504972	0.0060024
GRID1	93.7448	-1.11208	0.000118372	0.00207501
GRID2	11.8281	-1.61705	0.00623445	0.0375973
GRIK5	93.4519	-1.77976	0.000167891	0.00265825
GRIN2B	38.658	3.35247	0.00174176	0.0151204
GRM8	9.54715	-2.37878	0.000828123	0.0087822
GRN	11978.3	1.38264	7.70867e-09	9.31327e-07
GSDMC	15.0471	3.39808	0.000632952	0.00720449
GSG1L	53.8627	6.32474	2.26625e-05	0.000604853
GSTA1	21.8076	-3.33321	6.68829e-06	0.000236132
GSTM1	788.117	-3.46836	0.00806942	0.0454296
GSTM2P1	70.8683	-1.21237	0.00150126	0.0134692
GSTM5	501.22	-1.43296	0.000125146	0.00214518
GTSF1	8.02276	2.56643	0.00241275	0.0191083
GUCY1A2	708.4	-1.84969	5.7554e-07	3.29039e-05
GUCY1B1	449.724	1.70066	0.000101283	0.00185125
GVQW3	12.3029	-1.3766	0.00312825	0.0229734
GZMA	1085.75	2.46556	7.47519e-05	0.00146049
GZMB	240.413	2.79129	5.33419e-06	0.000196244
H1-0	1412.8	1.16362	8.41007e-05	0.0016053
H1-1	186.299	-1.53216	0.00645061	0.0385314
H2AC12	1695.31	-1.17227	0.00502904	0.0320876
H2AC5P	7.07708	-1.39009	0.00363084	0.0254092
H3C1	585.623	-1.24755	0.00601997	0.0366553
H4C4	695.781	-0.996893	0.00272286	0.0207399
HABP2	757.178	4.24392	0.000119207	0.00208009
HAL	1558.77	5.08628	6.98835e-13	3.34842e-10
HAND2	1589.02	2.35679	3.41376e-07	2.20187e-05
HAP1	781.423	5.49104	3.44419e-12	1.35904e-09
HAVCR1	306.749	4.73428	1.50028e-07	1.08603e-05
HAVCR2	116.386	1.23899	0.00252965	0.0197084
HCN1	186.949	-3.69989	1.13299e-09	1.94875e-07
HCRTR2	3.96687	-2.38775	0.000783809	0.00841874
HELLS	638.748	-1.20487	0.000327624	0.00433472
HEYL	207.939	-1.42563	0.00360731	0.0253115
HGD	4205.17	3.17231	4.37016e-05	0.000962201
HIF1A	6881.38	1.13876	8.0706e-05	0.00155419
HIF3A	34.1651	2.08711	0.00430512	0.0286689
HILPDA	115.995	1.56398	0.007588	0.0433933
HIP1R	1167.26	1.20309	1.09705e-07	8.31292e-06
HIPK3	4400.66	1.14405	6.68975e-08	5.5174e-06
HK3	69.1583	1.59905	0.00851396	0.0472257
HLF	64.1368	-1.37977	0.000204117	0.00308151
HLX	14.0845	1.83461	0.00289781	0.0216786
HMCN1	3024.21	-1.3997	1.16913e-06	5.8005e-05
HMCN2	50.5802	-2.02683	0.000119549	0.00208227
HMGB1P6	12.2974	-1.13229	0.00317424	0.0231528
HMGN1P18	12.7375	-1.38015	0.00152832	0.0136693
HNF1B	106.019	2.07079	3.72754e-05	0.000851115
HNMT	1619.01	1.37625	0.00160039	0.0141816
HNRNPA1P14	965.576	-1.26321	0.000462724	0.00563331
HNRNPA1P22	15.8646	1.60822	0.00273096	0.0207937
HNRNPA1P40	60.6886	-1.19266	0.000329513	0.00435113
HNRNPA1P53	25.7323	-1.55561	0.00123502	0.0116793
HOOK1	989.208	1.45147	0.000238232	0.00343423
HOPX	70.9613	1.13038	0.00647547	0.038634
HPSE	224.162	1.72784	0.000101772	0.00185512
HS3ST1	64.8673	-1.48984	2.54105e-06	0.000104787
HSBP1L1	22.5536	1.04068	0.0087728	0.048013
HSD11B1	16.3195	2.63406	0.000225498	0.0033094
HSD17B2	245.226	6.11311	5.82989e-27	3.91069e-23
HSD17B2-AS1	11.4389	4.75668	1.27631e-07	9.51276e-06
HSPB1	8013.26	1.17286	0.00495478	0.0317446
HSPB6	159.77	2.43159	1.29985e-05	0.000395138
HTATIP2	405.448	1.85986	1.47392e-06	6.9302e-05
HTR1A	4.12659	-1.78047	0.00586288	0.0359162
HTR1D	58.2339	5.64241	1.03057e-10	2.62521e-08
HTR2A	57.7595	4.00601	5.17192e-14	3.85481e-11
HTRA4	28.8212	1.53974	0.00037994	0.00486381
ICA1	944.861	1.07151	0.000567448	0.00660076
ID2	1249.78	1.13119	0.00319941	0.0232807
ID4	246.392	2.08086	2.13338e-06	9.17355e-05
IDO1	1933.73	3.08521	9.58493e-06	0.000315175
IDO2	294.485	5.65407	3.22182e-10	6.89743e-08
IFI44L	248.018	-2.02019	5.01069e-06	0.000186043
IFIT1	143.015	-1.35283	0.00155107	0.013842
IGDCC4	94.499	-1.91718	0.00592946	0.0362028
IGF1	3042.57	-1.31851	0.00119928	0.0114666
IGF2BP1	6.80948	-1.61226	0.00282246	0.0212413
IGFBP1	123.4	6.00592	4.64912e-05	0.00101036
IGFBP2	1044.19	1.1393	0.00012336	0.00212361
IGFN1	2556.37	-3.52665	0.000199563	0.00302696
IGKV1-5	53.8052	-2.77832	0.00262554	0.0201666
IGKV3-15	6.14771	-4.40234	0.0003627	0.00468183
IGLV2-8	11.4145	-2.74108	0.00809777	0.0455194
IGSF1	5.81653	-2.35418	0.000356575	0.00462353
IGSF11	92.6881	2.89898	3.03695e-05	0.000734304
IGSF5	19.8792	-1.84769	3.28587e-05	0.000778856
IHH	579.5	-2.15266	0.00243792	0.0192773
IL11RA	347.21	-1.05824	0.00252671	0.0197007
IL15	161.228	2.39665	3.74671e-08	3.45866e-06
IL17RB	161.261	-1.93669	0.000613101	0.00701423
IL17RD	416.194	-1.15305	3.00697e-06	0.000120064
IL1B	583.685	3.2212	0.00372218	0.0258294
IL1R1	2409.4	1.52614	9.0934e-07	4.65638e-05
IL20RA	627.044	2.59921	3.46181e-08	3.25802e-06
IL2RB	535.031	1.46056	0.00279152	0.021111
IL6	5.87458	2.28192	0.00485244	0.0312421
IL6ST	14069.3	2.51846	9.42021e-07	4.78718e-05
IL6STP1	7.50632	3.39698	0.000384084	0.00489196
ILDR1	584.67	1.67823	3.08652e-06	0.000122996
ILDR2	6.86201	-2.21277	0.000130187	0.00220716
IMPA2	341.813	1.91861	5.21269e-05	0.00111123
INAFM1	59.2762	1.29692	0.00422511	0.0283231
INMT	7.24054	3.06473	0.00752526	0.0431571
INSL3	4.1752	2.36125	0.00584035	0.0358546
INSRR	120.978	3.56654	5.90426e-08	5.03463e-06
INTS3	48.5221	4.10188	0.00457645	0.0299696
IPO7P2	32.3565	-1.03487	0.000211188	0.00315045
IQCA1	333.051	-1.28156	4.93875e-05	0.00106183
IRAG1	822.584	-1.7261	0.000412508	0.00516893
IRF5	64.6954	1.01101	0.000752636	0.00819148
IRS2	2095.33	3.90274	9.19745e-14	6.38239e-11
IRX3	790.412	6.70767	1.03706e-13	6.73218e-11
IRX5	30.4309	5.04377	8.90619e-08	7.0011e-06
ISG20	224.521	2.52255	8.28031e-07	4.36212e-05
ISM1	102.081	-1.63759	0.00115264	0.0111197
ISOC1	550.451	-1.2176	2.52002e-06	0.000104347
ISYNA1	616.498	-1.41834	3.36376e-08	3.19303e-06
ITGA11	187.38	-2.38358	0.000113889	0.00201868
ITGA8	272.137	-1.74431	0.00585255	0.0358918
ITGB8	3595.41	1.93033	6.33391e-07	3.56043e-05
ITIH2	35.3099	-1.06068	0.000670098	0.00750838
ITPKC	521.531	1.47834	2.75549e-07	1.83614e-05
IVNS1ABP	7452.3	2.05694	1.38616e-05	0.000415104
IYD	9.22231	4.02325	0.00171845	0.0149818
JOSD2	76.2084	1.09605	7.73875e-05	0.00150033
JPH1	146.784	1.24634	3.30077e-05	0.000780549
JPT2	1088.25	1.32097	3.2784e-05	0.000778001
JUN	2080.41	1.49566	0.00154951	0.0138342
JUNB	323.556	1.7003	0.00677459	0.03998
JUP	4828.39	1.56139	6.86601e-05	0.00137542
KBTBD12	28.5106	-1.06166	0.00284304	0.0213482
KBTBD6	501.003	-1.08334	1.05856e-05	0.000341387
KCNAB1	60.4961	-1.12717	0.00682893	0.0402299
KCNB1	51.5981	2.28041	4.84165e-07	2.90761e-05
KCNC2	18.9403	-3.42016	0.00191406	0.0161783
KCNC4	209.856	1.01175	0.00696948	0.0408784
KCND1	81.7167	-1.02286	7.46347e-05	0.00146049
KCNH1	87.4692	2.82346	4.4965e-05	0.000984744
KCNH5	34.8246	5.63645	6.40378e-06	0.000227283
KCNH8	23.3697	-1.37833	0.00292871	0.0218772
KCNIP4	100.945	-1.36885	0.00386345	0.0265714
KCNIP4-IT1	7.98967	-3.11184	0.00700485	0.04105
KCNJ11	43.0677	1.00124	0.00509674	0.0324066
KCNJ5	22.3179	-1.49622	0.00320185	0.0232807
KCNJ8	127.247	1.12889	0.000761343	0.00824168
KCNK1	214.186	1.42145	1.84588e-05	0.000515208
KCNK13	20.283	3.91945	7.38838e-09	9.06608e-07
KCNK17	9.8308	1.66741	0.00543899	0.0339288
KCNMB4	31.559	-1.3089	0.00661069	0.0392082
KCNQ5	20.5811	2.04949	0.00577526	0.0355743
KHDRBS2	90.1042	-3.82155	1.46073e-08	1.57196e-06
KHK	31.5292	-1.35896	0.000386404	0.0049029
KIAA0513	290.902	1.51284	2.4143e-05	0.000627719
KIF12	1084.22	2.01713	0.000571442	0.00662807
KIF13B	3741.07	1.0977	4.62042e-07	2.84047e-05
KIF1A	80.3627	-1.84338	8.30909e-06	0.000279619
KIF21A	2566.87	-1.39079	9.42332e-10	1.66346e-07
KLC3	5.44037	2.54962	0.00363394	0.0254098
KLF15	93.9637	2.39151	1.15718e-09	1.97348e-07
KLF2	49.6077	1.34434	0.00490216	0.0314978
KLF4	649.593	2.18048	7.29437e-07	3.90404e-05
KLF5	661.833	1.68311	1.88808e-05	0.000523358
KLF6	11494.4	3.06534	1.92368e-09	3.12194e-07
KLF8	152.552	1.56511	7.38934e-06	0.00025376
KLF9	213.19	1.47521	8.76484e-11	2.2907e-08
KLHDC7A	7.9128	1.85901	0.0024095	0.0190901
KLHL14	74.7825	-1.39032	0.000123131	0.00212148
KLHL23	225.231	-1.44516	2.45437e-05	0.000634855
KLHL38	3.88417	3.18553	0.0056914	0.035133
KLK6	38.6844	-1.61184	0.00219959	0.0178847
KLRG1	14.154	-1.30405	0.00136446	0.0125266
KMO	430.807	-1.85067	0.00450527	0.0296772
KPNA4P1	3.90143	-2.10465	0.00906145	0.049112
KREMEN1	697.251	1.24777	0.000145501	0.00239612
KRT15	41.257	2.2781	0.00266735	0.0204098
KRT18	5884.6	1.34384	0.000332859	0.00438094
KRT18P17	138.463	1.2022	0.00322845	0.0234124
KRT18P28	110.595	1.23405	0.00209869	0.0173225
KRT18P5	65.6696	-1.24145	0.00207899	0.0171818
KRT8P1	3.38074	-2.19806	0.00174365	0.0151204
KRT8P15	50.277	-1.17878	0.00523392	0.0330491
KRT8P39	35.6639	-1.1738	0.000559031	0.00654066
KRT8P46	27.9243	-1.12893	0.00553192	0.0344018
KSR1	1746.85	1.12071	9.69081e-05	0.0017908
KSR2	34.2638	-1.35352	7.56038e-05	0.00147285
KYNU	447.834	1.18067	1.48075e-05	0.000435651
LACTB2	165.672	1.51441	0.00119164	0.0114193
LAMA1	1702.97	-2.60545	5.57492e-08	4.81501e-06
LAMA3	3960.09	-1.12127	0.0020324	0.0168869
LAMA5	4024.25	1.04394	0.000168506	0.00266589
LAMB1	17590.5	1.06546	0.00012085	0.00209654
LAMB3	3238.57	2.98164	0.00145772	0.0131607
LAMB4	19.0412	1.14264	0.00285531	0.0214324
LAMP5	34.4817	-2.27545	0.0024053	0.0190822
LBP	289.646	6.84965	3.23781e-08	3.13259e-06
LCP1	3719.78	1.5053	0.00386574	0.0265781
LDHA	13401.4	1.54713	3.10329e-05	0.000746124
LDHAP3	12.7961	1.53456	0.00258337	0.0199367
LDHD	51.8901	1.85381	7.83746e-07	4.13966e-05
LEFTY1	5.48565	3.59353	0.00475236	0.0307948
LEPR	1355.92	1.32589	0.0020578	0.0170416
LEPROT	222.272	1.14042	0.00167741	0.014684
LETM1P2	13.0745	-1.71326	0.00259893	0.0200386
LFNG	341.042	-1.35305	0.000265336	0.0037397
LGALS3	2553.63	1.71827	1.81654e-08	1.91393e-06
LHFPL3	126.571	5.42609	4.10106e-17	9.16996e-14
LHFPL5	3.78051	4.24898	0.00130794	0.0120963
LIF	509.269	3.23283	0.00033169	0.0043684
LINC00303	6.06246	-4.39017	8.7539e-07	4.52491e-05
LINC00471	47.4525	-1.13981	0.00605634	0.036801
LINC00937	11.1743	-1.8495	0.00339197	0.0242618
LINC01101	2.41761	-5.16119	2.62184e-07	1.75873e-05
LINC01124	27.0835	1.03263	0.00360031	0.0252841
LINC01320	16.3835	3.49777	7.18856e-07	3.88427e-05
LINC01341	26.6863	1.34553	0.00873983	0.0479107
LINC01502	11.4282	6.48113	1.9341e-05	0.000534144
LINC01541	48.9901	1.87719	0.000396075	0.00499725
LINC01559	2.32902	4.19732	0.000210186	0.00313782
LINC02432	5.0894	3.07553	0.00678638	0.0400379
LINC02532	3.33641	4.70348	0.00315833	0.0230992
LINC02669	2.21264	4.09495	0.00122409	0.0116086
LINC03026	12.6228	2.15829	0.00242965	0.019227
LINC03033	6.95258	3.98378	0.000261012	0.00369902
LINGO2	153.646	3.64468	9.17095e-09	1.06067e-06
LIPC	86.8443	2.82969	0.000222442	0.00328993
LIPF	3.65458	3.60718	0.00148568	0.0133473
LIX1	16.0217	-3.70398	0.000383185	0.004886
LLGL2	923.155	1.27332	7.21875e-07	3.88427e-05
LMCD1	232.337	2.22249	1.7668e-05	0.00049914
LMO2	315.955	1.39006	0.00167752	0.014684
LMO7	1555.76	2.05473	9.26669e-07	4.72109e-05
LMOD1	935.822	2.01237	2.96159e-06	0.00011896
LONRF3	241.309	1.29275	0.000342554	0.00447614
LOX	473.422	1.08889	0.00105227	0.0104212
LPCAT3	779.836	1.20588	4.00286e-05	0.000896174
LPIN3	893.572	1.85285	2.29022e-06	9.7028e-05
LRATD2	19.416	2.15397	0.00428148	0.0285683
LRFN4	110.859	1.11681	0.0031646	0.0230992
LRIG3	1712.9	1.7164	4.63993e-05	0.00100945
LRP10	943.795	1.26577	3.40419e-09	4.89328e-07
LRP2	44.0224	2.21182	0.00706937	0.0413078
LRRC31	81.8287	3.67607	2.81404e-08	2.77597e-06
LRRC37A2	160.424	-2.64668	0.00563774	0.0348751
LRRC52	3.45664	3.54031	0.00694996	0.0408115
LRRC8A	1492.3	1.08637	0.000415232	0.00519337
LRRN1	51.048	-2.04376	0.000324472	0.00431001
LRRTM4	48.1892	-4.7321	1.00066e-07	7.77504e-06
LSAMP	420.089	-1.32303	0.00302488	0.0224167
LSMEM1	4.72404	1.87955	0.00533506	0.0335823
LURAP1L	56.1784	2.1366	6.22553e-05	0.00127709
LYN	686.908	1.09309	0.00377255	0.026089
LYPD3	63.7429	2.89397	1.66421e-06	7.6813e-05
LYPLAL1-AS1	4.34314	4.47026	0.00132598	0.0122347
LYVE1	57.8978	2.15689	7.89441e-06	0.000268811
MAB21L3	20.6409	3.34654	0.000611982	0.00700542
MAFF	25.9237	3.52416	9.07621e-07	4.65638e-05
MAFK	106.065	1.92356	2.62084e-06	0.000107417
MAGEE1	63.4343	-1.15545	0.00123105	0.0116527
MAGEL2	96.1872	-1.78012	0.000208856	0.00312028
MAGIX	38.8483	1.62556	3.16419e-06	0.000125594
MAL	31.4282	4.39435	3.30065e-05	0.000780549
MALRD1	59.8697	-1.95362	1.09989e-08	1.22967e-06
MAMDC2	56.4606	1.02703	0.00473724	0.0307325
MAOA	9128.02	4.71827	1.03996e-12	4.6507e-10
MAOB	1572.57	1.59429	8.65549e-06	0.000289341
MAP1LC3B	537.934	1.22554	9.84431e-07	4.97756e-05
MAP1LC3B2	65.1848	1.38646	2.53254e-08	2.53556e-06
MAP3K5	3746.7	2.82912	4.42162e-07	2.75482e-05
MAP3K8	335.272	1.68428	3.8227e-06	0.000147912
MAP7	1193.69	1.41782	0.000145638	0.00239643
MAPK13	357.315	1.08969	2.26762e-06	9.63662e-05
MAPK4	3.99495	-2.46743	0.0037873	0.026164
MAPK6	1349.66	1.36739	0.000324207	0.00430935
MAPK6P4	8.22549	2.18831	0.00206424	0.0170809
MASP1	2728.45	2.30133	6.22862e-14	4.4766e-11
MATN3	53.0313	1.62521	0.00726397	0.0421876
MBOAT4	73.6494	4.01331	1.8977e-05	0.000525299
MC3R	2.36202	-4.23472	0.000371085	0.0047717
MCC	1983.4	1.01873	0.00707433	0.0413248
MCIDAS	4.18951	-3.9522	2.39063e-06	0.000100227
MCL1	3101.55	1.09147	0.00279368	0.0211195
MCTP2	480.295	1.07412	0.000972817	0.00981611
MCU	376.504	1.02712	0.00100058	0.0100427
MDC1	5.82762	-3.43823	0.00937035	0.050268
MDK	3153.71	-1.10513	6.19956e-05	0.00127436
MECOM	3246.2	-1.25554	1.91972e-07	1.3414e-05
MED12L	82.2713	-2.32308	3.06202e-14	2.5675e-11
MEDAG	101.767	4.38345	1.64138e-10	3.92275e-08
MEGF10	38.3869	-1.27572	0.00368483	0.0256409
MEGF11	44.5203	1.11869	0.00174971	0.0151469
MEGF6	233.163	1.22453	0.00104278	0.0103527
MELTF	91.7324	1.86064	0.00706447	0.0412912
METTL24	80.4512	-1.00402	0.00250454	0.0195962
MEX3A	173.973	-1.48222	7.46169e-06	0.000255373
MEX3B	162.454	-1.08184	2.92765e-06	0.000118068
MFAP2	733.675	-1.76975	0.000388337	0.00492432
MFAP5	60.9092	1.8793	0.00200868	0.0167174
MFSD4A	738.579	4.82757	8.27927e-13	3.78664e-10
MFSD6	579.72	1.0225	0.00212657	0.0174773
MGAT4A	319.051	1.07912	0.00472485	0.0306917
MGLL	1361.03	1.08541	1.87128e-05	0.000520853
MGST1	1361.71	2.8714	1.80977e-13	1.07117e-10
MIAT	3.6	-2.14507	0.00558795	0.0346539
MIR4260	23.2252	4.55237	0.00750205	0.0430608
MIR503HG	8.01783	-2.24389	0.000985412	0.00992017
MIR554	12.1602	1.80087	0.00596816	0.0364025
MIR587	6.94413	5.76322	3.33939e-05	0.00078853
MIR873	4.04878	4.35723	0.000881095	0.00918274
MIR921	2.76952	-2.26158	0.00413986	0.0279659
MIR924	2.06821	-3.16293	0.000990073	0.00995714
MISP3	31.0966	1.84911	1.09192e-07	8.31292e-06
MLC1	18.6095	3.22353	0.00111843	0.0108789
MLIP	5.33033	4.17535	0.000747683	0.00815522
MME	7788.52	1.21361	0.00500489	0.0319437
MMP8	3.12891	3.34871	0.00550436	0.0343047
MMRN1	549.598	1.70539	0.00153172	0.0136936
MN1	49.1336	-2.12928	1.13916e-11	3.75812e-09
MOCOS	816.877	1.03151	0.00738781	0.0426851
MPC1	313.201	1.56009	0.000184899	0.00287773
MPC2	449.899	1.05749	0.000704818	0.00778472
MPZL3	213.092	1.18458	0.00324018	0.0234805
MRPL41	88.6404	1.14633	3.2366e-07	2.11472e-05
MRPS2	82.7543	1.75347	6.03852e-05	0.0012438
MSI1	160.561	-1.64135	2.01945e-08	2.09481e-06
MST1R	335.433	1.10136	0.00178862	0.0153755
MSX2	435.915	-2.42773	3.43252e-05	0.000805256
MT1E	934.566	2.06059	0.00184358	0.0157141
MT1F	1003.08	2.75811	2.74264e-05	0.000685627
MT1G	1306.73	4.12829	1.02713e-07	7.90672e-06
MT1H	352.321	6.86403	1.46275e-13	8.92009e-11
MT1HL1	10.8205	6.40792	2.08465e-06	9.08351e-05
MT1M	272.72	4.20529	3.64749e-07	2.31553e-05
MT1P3	38.6887	2.03937	0.0025795	0.019931
MT1X	300.292	1.66341	0.0062845	0.0378084
MT2A	1480.58	2.27034	3.07815e-05	0.000740964
MTF1	1414.03	2.00529	1.36051e-05	0.000409809
MTHFD2	555.325	1.94141	6.61254e-13	3.24563e-10
MTHFS	8.68166	1.79176	0.00123192	0.0116554
MTMR8	154.179	-1.42182	2.5553e-05	0.000650922
MTNR1A	29.4258	5.06785	1.62661e-06	7.52506e-05
MTUS2	300.697	-3.09871	0.00045455	0.0055607
MUC15	113.457	4.20066	6.39601e-09	8.1983e-07
MVP	2440.49	2.15143	6.83153e-11	1.80892e-08
MXRA7P1	134.249	1.29844	6.85389e-05	0.00137542
MYB	117.052	-1.30363	0.000372215	0.00478012
MYCN	38.0634	-3.14572	1.1083e-08	1.23223e-06
MYL10	5.88313	-2.31569	0.0025559	0.019859
MYLK	4981.83	-1.02076	3.31178e-06	0.000130168
MYLK-AS1	3.74584	-2.30466	0.0017309	0.015065
MYLK3	122.815	1.93787	0.00524058	0.0330704
MYO18B	7.57561	2.53361	0.00826549	0.0462169
MYO1D	1963.72	1.1122	0.000318418	0.00426908
MYO3A	39.4146	-2.79731	0.000165838	0.0026382
MYO3B	125.128	-1.91215	5.70199e-06	0.000207499
MYOCD	230.046	5.41298	1.6774e-10	3.92511e-08
NAA20	631.885	1.24849	1.68226e-06	7.69407e-05
NABP1	601.99	2.43094	5.03282e-07	2.9737e-05
NAGS	247.029	1.34685	0.000692319	0.00768463
NAMPTP1	342.214	1.07613	0.00221478	0.0179646
NAP1L2	14.8452	-1.72939	0.0019118	0.0161783
NAP1L3	193.869	-1.36872	0.00370632	0.025759
NAT8L	7.11114	-1.85641	0.000764878	0.00827104
NATD1	34.6273	1.13824	6.37969e-05	0.00129688
NCMAP	26.9449	2.20162	0.000753183	0.00819301
NCR3LG1	40.2078	1.26313	0.00128549	0.0120154
NDNF	308.693	-2.05561	5.99646e-09	7.78534e-07
NDRG1	7648.06	2.59203	8.93132e-11	2.30428e-08
NEAT1	779.847	1.492	2.59757e-06	0.000106681
NECTIN1	441.853	-1.03022	1.30226e-05	0.000395274
NEFM	856.184	-3.10541	0.000304969	0.00414675
NETO2	147.285	-1.01711	0.00103814	0.0103164
NEXMIF	27.2584	-1.76024	6.49219e-05	0.0013157
NFASC	86.1236	-1.04723	0.00138861	0.0126963
NFIL3	426.2	2.84324	7.83439e-21	3.94148e-17
NFKBIZ	1187.02	2.68254	1.71446e-05	0.000488695
NGEF	61.0189	1.67434	0.00319288	0.0232634
NHS	1097.19	-1.03322	0.00106477	0.0105088
NIBAN2	2554.89	1.71116	1.85116e-08	1.94025e-06
NID1	16586.2	1.09413	0.0010312	0.0102732
NINJ2	45.1103	2.62649	2.05754e-05	0.000561589
NKD1	90.9338	-1.99255	0.000614048	0.00702108
NLGN3	547.422	-1.73922	0.00124474	0.0117326
NLGN4Y	27.7362	6.58684	0.00440288	0.0291555
NLRP5	8.61387	5.48643	1.87975e-05	0.000521768
NNMT	257.752	3.89386	6.3794e-07	3.56844e-05
NOS3	230.041	1.73939	1.25647e-05	0.000384859
NOSTRIN	201.427	2.93003	8.0077e-10	1.46882e-07
NOTUM	5.18065	-3.20096	2.1104e-05	0.000569298
NPAS2	411.228	1.64658	3.96305e-05	0.000890816
NPAS3	633.217	-2.35361	6.5798e-07	3.62772e-05
NPR1	914.317	2.94882	6.70152e-09	8.52159e-07
NPR2	3346.15	-1.30858	4.16563e-05	0.00092387
NPR3	183.052	2.60636	6.01499e-06	0.00021654
NPY1R	36.2831	-3.46305	8.59982e-06	0.000288438
NQO1	354.827	1.52966	0.000423023	0.00526789
NR4A1	318.282	2.48439	0.00391486	0.0267968
NR4A2	579.178	1.81176	0.00746499	0.0429757
NRCAM	967.401	-3.15377	2.67305e-13	1.49423e-10
NREP	203.888	-2.32021	5.47039e-08	4.76564e-06
NRG1	125.231	-2.18148	0.000208184	0.0031167
NRG2	218.443	-1.99937	0.00164553	0.0144795
NRIP3	23.7542	-1.52921	2.40753e-05	0.000627719
NRP2	835.733	-1.36087	0.00509954	0.0324142
NSG1	74.5504	-1.19869	5.29546e-05	0.00112175
NT5DC2	1088.44	-1.02473	0.00469004	0.0305444
NT5E	3182.01	1.21368	0.00073274	0.0080183
NTRK1	145.58	3.86331	5.16679e-07	3.02257e-05
NTRK2	423.512	4.12021	5.6904e-07	3.2625e-05
NUDT16	290.11	1.11923	0.00541085	0.0338386
NUPR1	13.7124	1.94043	0.00246562	0.0194203
NUTM2B	195.287	-1.27488	0.00455147	0.0298643
NXF3	18.0206	1.71399	0.000382786	0.004886
OGDHL	213.696	-1.2314	0.00756064	0.0432983
OGFRL1	210.576	1.04651	7.87694e-05	0.00152419
OLFM2	258.593	-2.17458	2.49862e-05	0.000640856
OLFML2A	347.701	-1.2814	0.00129634	0.012072
OLIG3	8.78143	6.10397	0.000152906	0.00248553
OR1B1	7.15047	2.5919	0.00877984	0.0480254
OR1J1	32.3119	3.10989	1.23472e-06	6.03097e-05
OR1J2	24.5312	3.62286	1.41304e-05	0.000419575
OR1J4	39.2674	4.24859	5.02093e-09	6.82013e-07
OR1L8	13.0035	1.8364	0.00274935	0.0209021
OR1N1	36.3219	4.00571	1.7429e-07	1.23067e-05
OR1N2	33.3068	3.66897	8.43904e-09	9.93141e-07
OR1Q1	17.744	2.86671	2.44516e-05	0.000633287
OR2A7	128.174	1.05935	0.0012993	0.0120823
OR2Z1	2.673	4.38832	0.00555895	0.0345166
OR51B2	5.0857	-1.72763	0.00370692	0.025759
OR51I1	7.84635	-1.36444	0.00827071	0.0462322
OR52B6	10.1831	-1.32952	0.0057854	0.035615
OR52H1	7.12726	-1.54628	0.000944049	0.00961757
OR7E13P	7.17139	-1.69767	0.00308706	0.0227561
OR7E2P	31.672	-1.27629	0.000265789	0.00374278
ORC1	354.531	-1.23359	0.00187962	0.0159534
ORC6	207.271	-1.10604	0.00142318	0.01293
ORMDL2	360.067	1.2982	1.01948e-05	0.000331973
OSER1	424.731	1.064	0.000463916	0.00564099
OSGIN1	26.4207	1.46846	0.00117119	0.0112608
OSGIN2	114.235	1.07472	0.00197354	0.0165413
OSMR	2559.61	1.39645	0.000172224	0.0027098
OSR1	52.36	-4.18023	1.46338e-14	1.54995e-11
OTOGL	16.5017	1.30781	0.00240566	0.0190822
OVGP1	99.6072	-1.15657	0.00075026	0.00817446
PABPC4L	815.687	-1.68037	0.00100563	0.0100833
PAEP	37320.6	5.18435	6.26271e-06	0.000223856
PAG1	256.323	-1.55523	1.25041e-05	0.000383587
PAH	88.7676	-2.33136	2.45159e-11	7.36355e-09
PAK5	11.1091	-1.88456	0.00766988	0.0437869
PALLD	13570.7	-1.32946	0.000230661	0.00336096
PALM3	151.529	1.56983	0.000709291	0.00782553
PAMR1	3774.85	-1.67113	0.00101148	0.0101171
PANX2	25.466	1.81436	9.59646e-05	0.00177663
PAPLN	2335.05	2.0901	4.57864e-07	2.8264e-05
PAPPA	1167.26	1.49882	0.000121752	0.00210517
PAPSS1	5076.26	1.7049	2.17815e-05	0.000584442
PARD6B	186.212	1.50057	0.00178264	0.0153373
PARM1	1717.87	1.8183	1.20361e-06	5.90769e-05
PAX8	4807.45	1.80782	4.9542e-05	0.00106402
PAX8-AS1	82.3583	1.56488	0.00175224	0.0151469
PBK	131.293	-1.64045	0.0060231	0.0366633
PC	560.097	1.95356	2.62241e-08	2.61254e-06
PCA3	6.46855	3.36038	0.00267011	0.0204231
PCDH1	802.362	1.53015	2.23501e-05	0.000598102
PCDH10	160.302	-2.44784	0.000381517	0.00487779
PCDH17	772.333	2.73755	1.61249e-05	0.000468928
PCDH19	482.773	-1.43318	0.00205427	0.0170264
PCDHA9	101.458	-1.10298	1.19174e-05	0.000372401
PCDHB8	192.901	-1.13759	0.000118744	0.00207973
PCED1B	15.1278	1.73648	0.0024053	0.0190822
PCK1	16.1147	5.79776	2.72247e-05	0.000681573
PCSK1	55.6209	1.77775	0.00582013	0.0357631
PCSK5	2639.43	-1.75714	6.09422e-09	7.86154e-07
PCSK6	307.403	1.88684	1.76673e-10	4.08662e-08
PCYT1B	25.745	-1.47638	0.000501292	0.0059763
PDCL3P2	24.7062	1.57897	0.000528382	0.0062255
PDE5A	1035.86	-1.24681	0.00222157	0.0180052
PDE6A	42.4695	2.09942	0.00934352	0.0501411
PDGFC	514.937	-1.29468	0.00281549	0.0211968
PDGFD	151.392	-2.16326	5.99304e-11	1.65211e-08
PDK4	175.948	1.92028	1.99816e-07	1.39138e-05
PDZD2	1395.55	1.58713	6.57524e-07	3.62772e-05
PDZD4	60.2393	-1.45342	0.00197663	0.0165602
PDZK1IP1	150.097	2.64066	0.000708483	0.00782091
PEF1-AS1	2.82704	-2.8999	0.00330582	0.0237934
PEG10	147.751	-1.78739	8.31432e-05	0.00159241
PER1	345.659	1.34602	2.48623e-05	0.000640625
PER3	926.8	-2.44179	4.77683e-07	2.88675e-05
PERP	594.919	1.91485	0.000154602	0.00250227
PFDN5	16.1777	-1.26272	0.000211936	0.00315711
PGBD5	162.967	-1.81058	0.000192227	0.00295973
PGK2	10.4789	4.24861	0.000243296	0.00349471
PGR	10521.3	-1.46954	0.00141612	0.0128759
PGRMC1	1860.04	-1.48539	0.000937133	0.00958275
PHACTR3	19.6216	2.71147	1.1988e-06	5.89844e-05
PHAF1	911.926	1.3859	0.00010109	0.00184939
PHB1P4	3.12858	2.86026	0.00263381	0.0202069
PHF21B	139.05	-2.84696	5.04969e-09	6.82013e-07
PHGDH	1229.11	-1.7774	0.00482683	0.0311131
PHYHIP	28.5221	-2.02299	5.15469e-07	3.02257e-05
PHYHIPL	545.069	4.70452	3.4766e-14	2.79852e-11
PID1	90.0299	2.11037	5.41533e-07	3.14447e-05
PIK3IP1	133.007	1.03723	0.000953364	0.00967987
PIK3R3	14.7619	-1.33226	0.00178416	0.0153438
PILRA	145.028	1.88578	6.54824e-05	0.00132439
PIM1	652.961	1.68288	9.37427e-05	0.00174674
PIM3	120.167	1.18478	2.33237e-05	0.000617588
PKD1L1	52.1676	-1.11516	2.18508e-06	9.33599e-05
PKD2L2-DT	9.01359	-1.35407	0.0012428	0.0117285
PKIB	17.191	-1.55067	0.00403077	0.0273828
PLA2G2A	114.603	8.6446	2.20176e-07	1.4969e-05
PLA2G4D	10.7693	2.05009	0.00538358	0.0337505
PLA2G4F	79.4131	4.49831	3.7251e-17	9.16996e-14
PLAAT3	475.213	2.6593	4.29481e-08	3.89319e-06
PLAAT4	562.661	1.74685	0.000232021	0.00336997
PLAAT5	11.1597	1.22812	0.00636015	0.0381495
PLAC4	89.6827	1.39723	2.49986e-05	0.000640856
PLCB4	1947.19	1.45147	0.00049478	0.00592676
PLCD1	4450.25	1.24693	0.000115915	0.00204441
PLCD3	505.718	1.04197	0.000847079	0.00893897
PLCL1	948.103	2.44155	9.72897e-14	6.5262e-11
PLEK2	60.8719	-1.06718	1.17161e-05	0.000369554
PLEKHA1	1731.15	1.15778	0.00031842	0.00426908
PLEKHA7	1280.35	1.21949	2.08937e-05	0.000565903
PLEKHB1	20.4977	-1.04472	0.00489242	0.0314553
PLEKHG4B	471.098	-1.56746	0.00623968	0.0376062
PLEKHH2	4856.18	1.09948	0.00011577	0.00204365
PLIN2	963.054	1.49934	5.57074e-08	4.81501e-06
PLK5	5.57044	-2.48826	0.000150453	0.00245528
PLPP4	41.0169	1.80103	0.00193378	0.0163168
PLS1	488.816	1.21547	0.00121049	0.0115288
PLXDC1	361.459	-1.07911	1.11529e-05	0.000356257
PLXNA3	1875.21	1.12472	2.57614e-05	0.000654573
PLXNA4	249.376	2.32249	3.68658e-05	0.000844974
PMEPA1	439.296	-1.87788	0.000859476	0.00902719
PNKD	1313.86	1.24217	2.67917e-07	1.79122e-05
PNMA8A	114.164	-2.38885	1.54321e-06	7.22223e-05
PNP	1027.05	1.70256	0.000357062	0.00462388
PNPLA2	892.28	1.32163	1.09881e-07	8.31292e-06
PNPLA3	63.5629	-1.70788	0.00253952	0.0197548
PODXL2	114.437	-1.15159	0.000622691	0.00710376
POLR1F	427.681	1.18263	3.68357e-05	0.000844974
POPDC3	29.3347	2.11183	4.00793e-09	5.64025e-07
PORCN	896.484	-1.16339	0.0064885	0.0386887
POTEE	58.486	-3.02167	0.000178633	0.00278668
POTEKP	16.5644	-1.44358	0.000578884	0.0066874
PPARGC1A	506.826	2.94853	6.00134e-05	0.00123995
PPFIBP2	1341.5	1.65094	0.000477469	0.00576746
PPIAP30	43.8718	-1.09947	0.00226887	0.0183001
PPM1B	125.091	1.0744	2.41185e-05	0.000627719
PPM1H	1589.51	1.65082	0.00126957	0.0118998
PPM1J	14.2175	-1.86428	9.89402e-07	4.99016e-05
PPP1R11P1	9.01947	1.55761	0.00171152	0.0149296
PPP1R13L	103.55	1.17797	3.85392e-06	0.000148291
PPP1R14A	67.6463	1.43002	2.97867e-06	0.000119408
PPP1R14C	77.4196	2.728	0.00539872	0.0338079
PPP1R15A	1294.29	1.39626	0.00570433	0.0352021
PPP1R1B	30.8311	1.28327	0.00787992	0.0446315
PPP1R36	45.7284	1.67245	0.00210812	0.0173797
PPP1R3B	440.69	1.52193	5.42739e-10	1.08139e-07
PPP1R3G	34.3088	3.65506	6.6676e-11	1.78905e-08
PPP2R2B	15.7984	-2.34328	4.642e-08	4.11522e-06
PPP2R2C	909.225	-2.78381	1.02871e-06	5.17546e-05
PPP2R5A	681.618	1.54709	0.000154455	0.00250227
PPP3CC	661.014	1.04131	6.74464e-06	0.000237704
PRDM5	825.381	-1.03801	1.27947e-06	6.15983e-05
PRDM8	119.062	1.1778	0.00518064	0.0327641
PRECSIT	10.3971	1.15064	0.00849582	0.0471731
PRF1	629.388	1.46844	0.00333718	0.0239511
PRG4	202.51	2.64091	8.86697e-06	0.000295429
PRICKLE1	970.427	-1.14674	0.00121051	0.0115288
PRICKLE2-AS1	5.50151	-3.94862	9.05469e-06	0.000300687
PRKX	1208.15	1.63914	0.00029386	0.0040449
PRL	38.1814	3.30407	0.000538343	0.00632804
PRLR	1556.67	1.37923	0.00620345	0.0374552
PROK1	95.7736	6.19555	1.60996e-10	3.90347e-08
PROSER2	81.0381	1.69269	8.72773e-06	0.000291272
PRR16	60.8735	1.52976	8.19451e-06	0.00027762
PRRG4	209.009	1.51903	3.33837e-06	0.000130958
PRSS12	1209.69	-1.37255	0.00287061	0.0215231
PRSS35	14.1643	-2.21819	0.00109265	0.0107104
PRUNE2	3040.12	3.88056	5.53701e-09	7.33071e-07
PRXL2A	1443.13	1.30134	5.03892e-07	2.9737e-05
PSG9	53.5059	1.90506	0.00914862	0.0494645
PSTK	76.2677	1.15174	0.000285726	0.00396548
PTCH1	13793.5	-1.56106	0.00394062	0.0269365
PTCH2	632.849	-1.62201	0.0058614	0.0359162
PTGDS	65.2836	2.20297	4.8014e-07	2.89292e-05
PTGER2	63.5859	2.37721	0.00151625	0.0135869
PTPN2P2	17.7009	-1.22024	0.000467613	0.00568252
PTPN3	1391.3	1.15899	0.0002908	0.00401927
PTPRK	30.6086	3.45397	0.00263519	0.0202098
PTPRR	257.891	4.80484	2.15252e-10	4.92241e-08
PTPRU	1459.99	1.05024	0.000187046	0.00289994
PTPRZ1	5.42761	3.14396	0.00308456	0.0227459
PWAR5	14.3392	-1.10818	0.000375402	0.00481184
PWRN1	7.59817	-2.25791	0.00926482	0.049865
PWWP3B	282.334	1.02683	0.00869461	0.0478039
PYGL	4070.74	1.41696	0.00131909	0.0121823
RAB11A	1994.36	1.68679	1.08646e-05	0.000348153
RAB11FIP1	834.076	1.80667	2.43126e-05	0.000631311
RAB21	554.851	1.31798	0.000575243	0.00666064
RAB40B	168.079	1.03232	0.00138811	0.0126963
RAB6C	21.8892	-1.88832	0.00239423	0.0190441
RAB9A	52.4624	1.2876	0.000140511	0.00232919
RAB9B	18.2838	-1.18235	0.0050842	0.0323648
RAD51AP1	79.8961	-1.14155	0.0044154	0.0291999
RAI14	2537.5	-1.03203	0.0012434	0.0117285
RAMP3	38.5455	2.13871	0.00684884	0.0403236
RAP1GAP	407.864	1.1045	0.00566026	0.0349837
RAPGEF3	421.709	1.46629	1.7006e-05	0.000486119
RAPGEF5	450.301	1.51891	0.00166088	0.0145827
RAPH1	965.944	1.60294	1.62392e-07	1.16521e-05
RAPSN	20.8976	1.06746	0.00615843	0.0372669
RASD1	768.166	1.93377	2.63432e-12	1.0819e-09
RASEF	591.59	1.87118	2.92429e-05	0.000715918
RASGRP2	329.29	1.9092	0.0010087	0.0101079
RASL11A	64.4083	1.61527	0.000105699	0.0019077
RASSF10	12.5069	1.8617	0.00365452	0.0255182
RASSF6	78.1284	2.00372	0.000735322	0.00804219
RBBP8NL	20.1104	-1.76957	0.000229703	0.00334967
RBM47	509.732	1.14507	4.23573e-05	0.000937733
RBMXL3	16.7155	-1.25092	0.000956768	0.00969975
RBP4	195.912	6.53587	1.67859e-05	0.00048257
RBP7	158.859	-2.35265	9.59367e-07	4.86305e-05
RCC2P4	9.20296	-1.46198	0.0074744	0.0429757
RCOR2	168.098	-1.75127	0.00423621	0.0283692
REC8	788.911	-1.05441	0.0026852	0.0205073
REM2	14.0846	-1.12889	0.00179141	0.015393
REN	88.5668	3.32022	2.08988e-06	9.08351e-05
RET	95.4874	1.72245	0.000520023	0.00615947
RETREG1	741.392	2.00908	6.6065e-06	0.000233654
RETSAT	630.926	1.13565	0.000719508	0.00790895
RGCC	155.37	1.05644	0.00324221	0.0234868
RGN	69.8777	-1.01315	0.00667321	0.039486
RGPD5	144.085	2.46352	0.00476333	0.0308322
RGS16	143.77	1.76665	0.00101663	0.0101531
RGS2	270.597	1.37504	0.00883975	0.0482613
RGS6	113.112	2.74035	4.37159e-08	3.94502e-06
RHAG	7.25249	2.78344	0.000895075	0.00928626
RHOQ	70.7792	1.13442	3.81382e-05	0.000865269
RHOQP2	3.93851	2.69271	0.00208465	0.0172215
RHOU	1085.2	2.0347	3.65395e-13	1.98735e-10
RHPN2	2393.66	2.27968	0.000205594	0.00309239
RIC3	48.4511	-1.78355	1.78917e-06	8.03688e-05
RIMBP2	73.74	1.68404	0.000938669	0.00959358
RIMKLB	5378.46	3.74541	1.17655e-11	3.75822e-09
RIMKLBP1	659.671	2.90859	8.03445e-09	9.5109e-07
RIMS1	215.493	-2.98388	8.74792e-08	6.90366e-06
RIN2	1716.01	1.50158	4.47887e-06	0.000169422
RIOK3	1211.79	1.32481	1.19667e-05	0.000372783
RIPK3	63.6811	1.40576	3.7874e-07	2.38927e-05
RIPOR2	526.327	1.78221	0.00108242	0.010652
RLIMP1	201.873	1.78342	0.00698321	0.040947
RLN2	9.24697	-2.00503	0.00121798	0.0115774
RN7SL176P	6.36728	-1.77313	0.0093322	0.0500937
RNF125	21.8309	1.77269	2.2975e-05	0.000610764
RNF144B	322.155	1.22423	4.49702e-05	0.000984744
RNF227	41.4981	1.12038	0.00246388	0.0194203
RNFT2	70.185	-1.77441	1.18217e-06	5.84521e-05
ROBO2	539.364	-2.99565	2.19392e-09	3.42252e-07
ROBO3	43.1866	-1.23855	0.00696226	0.040848
ROPN1B	6.17174	-1.63823	0.00727234	0.0422241
ROR1	231.988	-1.18073	0.000636142	0.00722445
RORB	1783.92	1.04597	0.00289437	0.0216609
RORC	434.627	2.51611	6.93395e-07	3.77132e-05
RPL12P15	4.95687	-1.56594	0.00275442	0.0209318
RPL17P22	137.296	8.90533	1.39899e-07	1.03505e-05
RPL21P8	8.15513	-1.39815	0.00504675	0.03217
RPL26P29	3.6566	-2.70997	0.000220629	0.00326707
RPL36AP48	9.29535	1.54687	0.00924804	0.0498059
RPL39L	82.0405	-1.04268	0.000361412	0.0046742
RPL3P5	2.92101	-1.8943	0.00426156	0.0284772
RPL5P23	31.3516	-1.08755	0.000398346	0.00501647
RPL7P26	20.9479	-1.14144	0.000109715	0.00196085
RPL9P16	4.26112	-3.37254	1.3644e-05	0.000409809
RPS29P11	6.11195	2.46359	0.000756554	0.00821661
RPS5P2	5.5499	-2.13759	0.000658287	0.00741034
RPS6KA5	1027.65	2.09145	2.51253e-05	0.000642466
RPS6KA6	90.8573	-1.24237	0.00249085	0.0195337
RPSAP51	5.51051	4.23588	0.000320942	0.00428783
RPSAP56	15.2366	-1.89098	0.00226573	0.0182895
RPSAP70	17.7335	2.16858	0.000236103	0.00341577
RRAGD	79.8374	1.14784	0.0041398	0.0279659
RRAS	125.12	1.68501	3.07741e-05	0.000740964
RTKN2	117.113	-1.92563	0.000377832	0.0048399
RTN4R	280.292	-1.15914	0.00139301	0.0127187
RUNX1	593.786	1.30455	0.00218205	0.0177828
RXFP1	2427.04	2.75466	8.0394e-08	6.44561e-06
RYR2	491.187	1.69629	2.10369e-06	9.12384e-05
RYR3	576.246	3.08214	2.58788e-09	3.97116e-07
S100A1	130.915	3.3387	5.09743e-08	4.47951e-06
S100A10	269.481	1.54453	0.000643702	0.00729384
S100A11	1417.34	1.2477	0.000116606	0.0020548
S100A14	96.8632	2.11424	5.12762e-06	0.000189336
S100A3	19.564	2.73874	0.000382366	0.00488554
S100A4	553.521	2.10112	0.000973124	0.00981611
S100A6	2444.56	1.53074	0.0049156	0.031564
S100P	67.3844	4.1932	4.97722e-07	2.95462e-05
SALL2	184.826	-1.21423	0.00543128	0.0339122
SALL4	49.927	-1.71238	0.000508796	0.00604428
SAMHD1	4021.61	-1.16017	3.49366e-05	0.000817516
SAMMSON	4.8089	4.00896	0.0044947	0.0296367
SASH1	860.971	1.08043	4.6372e-07	2.84047e-05
SAT1	4912.64	1.94344	4.98015e-05	0.00106731
SBK1	34.7722	-1.59531	0.00782908	0.0444938
SBSN	32.213	2.68536	0.0013166	0.012165
SCARA5	399.035	5.76848	3.01438e-16	5.51467e-13
SCCPDH	2749.64	1.54309	0.000349964	0.00455248
SCGB1D2	691.022	4.25239	0.000205604	0.00309239
SCGB1D4	43.9876	2.96828	0.000903176	0.00934474
SCGB2A1	1564.64	2.35038	0.00137059	0.0125657
SCGB2A2	45.611	4.2867	3.078e-07	2.02424e-05
SCIN	527.936	2.52392	7.91549e-05	0.00152898
SCN5A	2056.48	-1.19026	0.00442262	0.0292275
SCNN1A	3136.23	1.47465	0.00413664	0.0279629
SCTR	41.2459	1.88477	9.1046e-09	1.05908e-06
SCUBE1	166.216	3.96592	5.21947e-05	0.00111138
SCUBE2	1100.62	-1.54008	0.000151498	0.00246662
SDCBP2	154.915	4.48382	1.83557e-12	7.69561e-10
SDCCAG8	18.2132	-2.46605	0.00392419	0.0268424
SDHCP4	19.286	1.45719	0.00396547	0.0270604
SDK2	1287	-3.22877	0.000290025	0.00401159
SEC11C	481.495	1.53229	3.52862e-05	0.000822458
SEC14L1	2388.88	1.63253	4.56572e-07	2.8264e-05
SEC14L6	64.978	1.71264	0.00650121	0.0387301
SECISBP2L	5176.87	1.79139	4.97221e-07	2.95462e-05
SELENOS	599.464	1.0295	0.000202456	0.00306103
SEMA3A	254.666	-2.24214	0.00176837	0.0152471
SEMA3C	1977.88	-1.52217	0.00200244	0.0166723
SEMA3D	183.968	-2.6444	4.96542e-09	6.79756e-07
SEMA3E	1229.58	-3.35662	3.46016e-06	0.000134685
SEPHS2	530.982	1.09504	0.000148623	0.00243003
SERINC2	1428.98	1.15571	6.46201e-10	1.2504e-07
SERINC5	2043.35	1.12621	0.000203521	0.00307482
SERPINB8	80.116	1.94254	1.84169e-06	8.25439e-05
SERPINE1	708.49	2.67388	1.78834e-05	0.000503005
SERPING1	19143.1	2.63703	1.45082e-06	6.83756e-05
SERTAD3	16.658	1.00138	0.00159499	0.0141586
SERTAD4	60.0559	-1.15812	5.48557e-05	0.0011523
SESTD1	2937.73	1.91216	1.15515e-05	0.000366082
SFN	439.623	2.37316	2.63086e-05	0.000663452
SFRP1	1007.88	-2.43921	0.000100944	0.00184872
SGK1	7117.94	3.829	3.11843e-15	3.48641e-12
SGK2	79.3019	1.44673	0.00108457	0.010652
SGPP2	463.144	1.77905	8.96154e-05	0.0016881
SGSM1	155.882	1.49624	0.00364876	0.0254869
SH2D2A	51.3543	1.60733	0.00866609	0.0477014
SH2D3A	118.783	1.93864	1.09851e-08	1.22967e-06
SH2D4A	322.588	1.05913	0.00773835	0.0440403
SH3BGRL3	373.569	1.37453	6.53287e-06	0.000231457
SHANK1	159.2	-1.7607	0.000829272	0.00878792
SHISAL2A	35.3712	-1.92061	0.000302881	0.00412673
SHROOM3	6302.54	1.43556	0.00394391	0.0269432
SINHCAF	35.8857	5.38344	0.000409814	0.00514158
SIX2	11.0456	1.75386	0.00829452	0.0463021
SLC10A6	24.5339	2.43199	0.00752869	0.0431645
SLC15A1	3708.25	5.29937	2.25337e-10	5.09515e-08
SLC15A4	735.886	1.61943	0.00114829	0.0110991
SLC16A12	118.277	-1.48722	0.00598963	0.0364927
SLC16A3	295.555	1.81204	7.5239e-05	0.00146716
SLC16A9	168.995	-2.05489	2.99978e-06	0.000120015
SLC18A2	1950.66	3.42063	1.6676e-05	0.000480784
SLC1A1	7336.4	4.61854	7.13747e-09	8.86633e-07
SLC1A2	132.527	-1.06026	0.00157129	0.0139791
SLC1A3	158.339	-1.01131	0.000250251	0.00357929
SLC22A17	189.817	-1.30186	0.000223889	0.00329835
SLC24A2	5.12234	4.1487	0.000568669	0.00661115
SLC25A19	166.77	1.2984	0.0091079	0.0493106
SLC25A48-AS1	4.27054	5.05604	0.000590659	0.0068078
SLC25A53	7.37215	-1.572	0.000326367	0.00432377
SLC26A2	2982.77	1.50592	0.00534459	0.0335968
SLC27A4	817.023	1.00772	0.00139144	0.0127163
SLC27A6	73.5795	-2.06317	0.000199601	0.00302696
SLC28A1	17.9347	-2.18729	2.52391e-08	2.53556e-06
SLC28A3	60.5961	4.0631	6.32848e-11	1.72101e-08
SLC29A4	82.1075	-1.52891	0.000744081	0.00812474
SLC2A12	51.0756	-2.68673	2.28495e-10	5.10915e-08
SLC2A13	300.549	-1.26388	6.2641e-07	3.53106e-05
SLC2A4	14.2955	-1.33557	0.00128989	0.0120342
SLC2A8	395.749	2.03226	2.52775e-15	3.06421e-12
SLC30A2	916.58	6.08888	7.15291e-17	1.43945e-13
SLC34A2	13176.7	2.15088	7.27882e-07	3.90404e-05
SLC35F6	520.822	1.02505	0.00327274	0.0236569
SLC38A5	346.455	-1.28222	0.00362798	0.0254075
SLC39A14	510.853	1.34475	1.07823e-05	0.000346618
SLC3A1	31.7577	5.01582	3.2781e-08	3.15638e-06
SLC40A1	4603.95	1.37987	0.00754162	0.0432263
SLC44A1	5231.63	1.78203	9.24136e-07	4.72013e-05
SLC47A1	765.401	-3.12781	5.0324e-06	0.000186505
SLC4A8	71.8644	-1.15432	0.00109107	0.0107001
SLC4A9	11.4371	-1.22697	0.00389884	0.0267418
SLC5A1	189.539	4.3931	3.88734e-13	2.00587e-10
SLC5A3	1592.93	-1.0045	0.000385275	0.00489981
SLC5A5	9.91276	-2.93257	0.00923012	0.0497538
SLC6A12	180.258	3.68437	1.69366e-06	7.71981e-05
SLC6A13	15.3598	3.80631	0.000129482	0.0021989
SLC6A6	1382.16	1.14339	0.000238757	0.00343934
SLC6A9	116.034	-1.51142	0.00147269	0.0132602
SLC7A11	124.076	1.38859	1.33283e-05	0.000402128
SLC7A2	2418.5	1.84952	2.29081e-05	0.000609793
SLC7A3	35.9498	-2.43616	0.00203219	0.0168869
SLC7A4	16.2894	3.55885	0.00540169	0.0338079
SLCO4A1	160.632	3.33167	7.64848e-08	6.18145e-06
SLCO4C1	61.316	3.46211	0.000218433	0.00324169
SLFN5	1406.71	-1.14386	4.04218e-12	1.56432e-09
SLIT3	2031.18	1.27792	0.00103861	0.0103164
SLK	2834.8	1.08234	1.69657e-05	0.000485658
SLPI	1166.93	1.65614	0.00876567	0.0480001
SMIM24	18.5471	1.96425	8.2766e-08	6.60946e-06
SMIM5	18.5684	2.05706	0.00466416	0.0304042
SMO	1120.46	-1.16195	0.00442213	0.0292275
SMTNL2	47.2993	-1.74498	1.5897e-05	0.000462967
SNAI1	25.9634	-1.19956	0.000521275	0.00616967
SNHG8	11.5935	-1.36867	0.00110874	0.010826
SNORA16B	19.5806	1.81979	0.000526846	0.0062141
SNORA25	87.4311	1.43601	0.0049083	0.0315272
SNORA74D	3.18441	-1.79171	0.00616601	0.0372963
SNORD3A	36754.8	1.00864	0.0094053	0.0504054
SNX10	64.0578	2.22772	0.000225704	0.0033094
SNX29	4843.51	1.69779	0.000110154	0.00196694
SNX5P2	57.403	-2.92268	1.17487e-05	0.00036962
SNX9	1583.46	1.38372	2.91826e-08	2.85083e-06
SOAT2	185.516	1.60338	0.00218206	0.0177828
SOBP	546.856	-1.19327	1.01265e-19	4.07573e-16
SOD2	7101.5	3.54454	7.48275e-08	6.07189e-06
SOD3	145.447	1.90393	6.87193e-06	0.000241767
SORBS3	739.379	1.20081	2.83576e-05	0.000703659
SORCS1	353.277	3.75503	1.37913e-08	1.49213e-06
SORCS3	15.0036	-2.54144	0.00035282	0.00458666
SOSTDC1	14.8218	-2.30888	0.0012479	0.0117466
SOWAHC	24.2079	1.188	0.00289201	0.0216513
SOX17	1149.45	-1.22286	0.00473456	0.0307325
SP5	40.1852	1.13995	0.00510836	0.03246
SPAG5-AS1	20.2651	-1.04214	0.00231669	0.0185807
SPATA2L	26.7993	1.04167	0.000456011	0.00557519
SPATA31C2	121.24	-2.48621	7.21884e-07	3.88427e-05
SPDEF	128.878	-2.72458	0.000323028	0.00430219
SPDYE22P	44.4282	-1.49441	0.00479849	0.0309701
SPHK1	145.921	2.63517	0.000956627	0.00969975
SPINK1	48.4976	7.39937	0.000215915	0.0032067
SPINT1	1537.46	1.15695	0.000486356	0.00584838
SPOCK1	858.211	1.39807	0.00307849	0.0227095
SPP1	5458.51	4.32632	8.54799e-10	1.53589e-07
SPTBN2	1256.55	-1.15038	0.00356208	0.025108
SPTLC3	557.156	2.15278	1.52276e-05	0.000446055
SPTSSA	123.927	1.23985	3.2602e-06	0.00012915
SPX	25.7718	3.08561	1.68106e-05	0.00048259
SQOR	322.767	1.66921	3.3597e-07	2.18098e-05
SRD5A3	995.031	2.09622	2.7953e-07	1.85652e-05
SRD5A3P1	3.69405	3.59431	0.00397549	0.0271195
SRGN	1121.28	1.36465	0.00326059	0.023586
SRP72P2	44.2239	-1.05169	0.00160651	0.0142232
SSTR2	11.1958	-1.38934	0.00295679	0.0220277
SSX2IP	419.319	-1.36184	1.16008e-08	1.26337e-06
ST3GAL1	146.675	1.34141	2.46436e-06	0.000102677
ST6GALNAC1	953.3	1.03717	0.00579633	0.0356605
ST6GALNAC3	47.2931	-1.5843	1.3277e-05	0.000401182
ST6GALNAC5	43.2506	2.54428	0.00214447	0.0175785
ST8SIA2	58.0864	-2.02666	0.000314795	0.00423176
STAB1	2002.81	1.28894	0.00234484	0.0187476
STAC2	38.3822	3.66961	0.000260726	0.00369902
STAR	147.821	1.48736	0.00091454	0.00942356
STARD5	37.7515	2.66451	3.13114e-09	4.56602e-07
STC1	786.58	2.35777	1.04297e-05	0.000337438
STC2	20.7731	-1.66603	0.000396699	0.00500199
STEAP4	188.34	4.3613	1.61285e-12	6.90574e-10
STK26	116.687	1.01319	0.00813685	0.0456753
STMN2	68.046	3.60139	0.0080305	0.0452551
STOM	2320.11	1.21321	0.000871255	0.00911285
STON1	59.8122	1.64254	0.000149165	0.00243653
STUM	28.3114	2.32128	1.75212e-06	7.90577e-05
STX18-AS1	2.76123	-2.22583	0.00454194	0.0298115
STX1B	53.5691	-1.40655	0.00337065	0.0241477
STXBP2	252.333	1.40661	1.28729e-06	6.18266e-05
STYK1	188.559	1.86186	1.45628e-05	0.000430973
SUGT1P3	61.5333	-1.01734	0.00277539	0.0210286
SULT1A1	4.61972	-1.59584	0.00476243	0.0308322
SULT1A2	18.8575	-1.6965	0.005741	0.0353958
SVOPL	34.7748	2.60111	0.000237564	0.00343197
SYN3	12.5115	3.07003	0.000411949	0.00516515
SYNE2	39127.1	2.20085	7.45714e-05	0.00146049
SYPL2	14.506	-1.88924	0.000929271	0.00953142
SYT14	740.437	1.43779	0.000264217	0.0037313
SYT16	9.91341	-2.65892	2.02438e-06	8.94557e-05
SYTL3	306.273	1.55031	0.000366226	0.00472154
SYTL5	433.114	1.58754	0.000317989	0.00426898
TARID	5.30856	-2.4936	0.004172	0.0280954
TAS2R1	5.18485	3.13128	0.000271222	0.00380088
TBC1D2	380.086	1.47355	0.000312956	0.00421266
TBC1D3D	29.3147	3.40585	0.00184249	0.0157141
TBC1D8	1121.64	1.40298	0.000787912	0.00844749
TBCK	2257.22	0.999719	0.00266041	0.0203645
TBX15	10.7171	2.90784	0.00438879	0.0291005
TBXAS1	556.457	1.52227	0.00478695	0.0309154
TCEAL5	87.2253	-1.89205	0.000456977	0.00558072
TCF4	4453.45	-1.11349	1.50796e-05	0.000442363
TCHH	23.4147	-1.6609	0.00167435	0.0146753
TCIM	460.599	1.14704	0.00121169	0.0115346
TCN1	919.459	6.3318	1.90398e-15	2.55438e-12
TCP11L2	441.986	1.43264	6.00956e-10	1.17414e-07
TEF	82.1108	-1.35144	9.26204e-05	0.00172903
TENM4	545.167	-1.97181	0.00108135	0.0106516
TENT5A	252.428	1.33336	0.00724174	0.0420915
TENT5B	8.92602	2.22019	0.00494552	0.0317055
TERT	13.1507	-2.96592	0.00409071	0.027727
TESC	155.598	1.29326	0.000496527	0.00594061
TEX101	36.3364	6.98031	0.00067268	0.00752893
TEX55	106.365	2.66313	0.000131997	0.00222845
TFPI	459.514	1.16971	0.00355968	0.0251045
TGFB2	567.707	2.71635	0.000120723	0.00209615
TGFB3	832.753	-1.58228	4.39775e-11	1.28261e-08
TGIF2	12.0162	-1.14522	0.0026545	0.020328
TGM2	15278.7	1.57761	0.00826113	0.0462054
THBD	811.882	4.40721	9.81273e-08	7.65393e-06
THEM5	37.0888	1.79069	0.00230568	0.0185309
THRAP3P3	26.8272	2.34807	0.00143765	0.0130087
THRB	324.995	2.19306	0.000664884	0.00746242
THSD4	961.097	-1.35353	0.0036923	0.025684
THSD7A	2310.87	1.96053	0.000330656	0.0043605
TIMD4	23.1982	2.06648	0.00702554	0.0411353
TIMP3	10513.8	4.14723	6.45094e-07	3.57627e-05
TIPARP	820.404	1.10665	0.000184542	0.00287439
TJP2	5.22547	1.6633	0.0081502	0.0457248
TLCD3B	2.95667	-2.41857	0.00794638	0.0448941
TLR3	592.832	1.83548	2.14345e-05	0.000575899
TLR4	639.773	1.58866	2.15358e-09	3.4125e-07
TLR5	226.61	1.75007	2.53305e-06	0.000104672
TM4SF1	1681.55	2.97935	8.10172e-10	1.46882e-07
TMBIM1	3909.49	1.5499	3.20493e-07	2.10085e-05
TMC1	120.189	1.41448	7.84086e-09	9.33665e-07
TMC5	1035.24	2.72113	5.17566e-05	0.00110568
TMED5	817.825	1.22728	4.56003e-05	0.00099584
TMEM101	841.68	1.55077	5.32267e-05	0.00112514
TMEM120B	1351.76	-1.75586	5.60239e-07	3.22121e-05
TMEM130	18.0994	-1.63329	0.0021495	0.0175983
TMEM139	8.90254	1.61614	0.007515	0.0431228
TMEM145	14.1673	-2.34641	8.90175e-05	0.00168048
TMEM150C	78.1526	1.47203	0.00197817	0.0165663
TMEM154	246.079	3.41853	2.08698e-06	9.08351e-05
TMEM178A	51.3609	-1.29219	0.000509394	0.00604781
TMEM196	66.9887	2.94783	0.000441536	0.00542459
TMEM215	45.5838	-3.1977	0.000345758	0.00450943
TMEM231	20.3802	-0.995863	0.00428888	0.0285982
TMEM252	463.803	6.38937	1.20893e-05	0.000374863
TMEM26	345.94	-1.2011	0.00833156	0.0464444
TMEM37	880.809	2.47774	4.19962e-12	1.57399e-09
TMEM45B	247.892	3.52326	2.40535e-08	2.45809e-06
TMEM61	2.2764	4.18762	0.000760701	0.00824168
TMEM63A	4093.57	1.41545	1.90807e-06	8.51822e-05
TMEM63C	189.399	3.50939	2.02702e-06	8.94557e-05
TMEM92	105.543	3.00958	9.40111e-06	0.000310513
TMEM98	793.326	-1.07218	2.58063e-05	0.000654889
TMOD1	711.196	1.51051	2.14552e-07	1.4736e-05
TMPOP2	25.5589	-1.09108	0.00328088	0.0236987
TMPRSS13	240.552	3.33887	1.27141e-06	6.13569e-05
TMPRSS3	132.072	-1.52291	0.00014778	0.00242373
TMPRSS4	1056.55	1.6784	0.00175742	0.0151852
TNFRSF19	321.753	-1.44036	0.000933495	0.00956013
TNFRSF8	18.5586	2.41538	0.000446762	0.00547542
TNNC1	105.063	-2.32244	0.000193612	0.00297197
TNP1	2.35819	-2.79377	0.00327568	0.0236696
TNS2	1923.44	1.36599	2.07345e-06	9.08351e-05
TOB1	1310.4	1.79894	4.75362e-07	2.88138e-05
TOM1	1213.2	1.2327	1.45984e-07	1.06297e-05
TOX2	61.8052	1.64749	3.91931e-05	0.000883228
TPH1	16.3411	-1.52069	0.000306429	0.00416098
TPRG1L	170.333	1.0734	1.92291e-06	8.56119e-05
TPSB2	4.46379	-3.10953	0.00219822	0.0178807
TRADD	85.3024	1.30048	2.67935e-06	0.000109592
TRAV13-1	2.98261	-2.53186	0.0092905	0.0499364
TRDC	271.863	1.60511	0.00927674	0.0498926
TRDMT1	191.408	-1.04062	5.44679e-06	0.000199293
TREM2	69.4179	1.60251	6.86889e-05	0.00137542
TRIB1	191.084	1.45218	0.00276316	0.0209596
TRIB2	625.469	-1.47369	3.1456e-05	0.0007527
TRIM45	136.207	-1.1564	7.22159e-05	0.00142618
TRIM6	31.3557	-1.05354	0.00135427	0.0124444
TRMT9B	234.407	-1.20368	0.000574411	0.00665484
TRO	735.071	-1.03593	0.000340841	0.00445974
TRPC4	423.922	2.36699	2.41062e-05	0.000627719
TRPM3	272.172	1.65967	0.00118495	0.0113769
TRPM8	66.6708	6.0562	2.67149e-09	3.98231e-07
TSC22D3	269.942	1.00143	0.000917764	0.00944227
TSPAN15	884.387	1.54795	0.00473252	0.0307316
TSPAN6	439.497	-1.24902	3.82044e-10	7.92603e-08
TSPAN7	13.3323	-1.53218	0.00297167	0.0220918
TSPAN8	277.714	3.28313	0.000356973	0.00462388
TSPO	197.237	1.28871	6.73239e-05	0.0013589
TTC22	60.1331	1.22495	0.00915408	0.0494807
TTC39A	335.189	2.2645	7.64346e-05	0.00148472
TTC7A	822.751	0.99852	6.95941e-05	0.00139175
TTC9	76.0421	1.79448	2.66928e-09	3.98231e-07
TUBA3D	56.4807	-1.06046	0.00736426	0.0425855
TUBA3E	20.8411	-1.40791	6.79126e-05	0.00136667
TUBB2B	105.25	-2.22485	0.000304957	0.00414675
TUFT1	424.809	1.51026	2.40921e-05	0.000627719
TULP2	76.357	2.56659	0.000852841	0.00897155
TXLNB	13.3086	1.1916	0.0090557	0.0491072
TXN2P1	8.50786	-1.22466	0.00608179	0.0369089
TYMP	698.796	1.26369	0.00345193	0.0245119
UBALD2	1130.81	1.42352	1.82086e-09	3.00352e-07
UBASH3B	286.095	1.19367	0.00774798	0.0440826
UBE2SP2	7.97802	-1.46779	0.00067853	0.00757754
UBE2U	4.77822	-3.91304	0.000226591	0.00331389
UBQLN3	12.2012	-1.28532	0.00191367	0.0161783
UBQLNL	46.2153	-1.12053	0.00358024	0.0251919
UCA1	69.1751	1.86004	0.00244465	0.0193154
UGT1A1	9.74681	6.26159	2.0396e-07	1.41048e-05
UGT1A2P	5.07892	4.71539	0.0003916	0.0049501
UGT1A3	5.08746	5.32367	1.22115e-05	0.000377489
UGT1A4	9.10404	6.16389	2.48524e-07	1.67267e-05
UGT1A5	10.3399	5.74884	5.41484e-06	0.00019867
UGT1A6	64.9628	8.40992	5.23295e-08	4.5786e-06
UGT2B17	47.5798	5.37389	0.000499327	0.00595994
UNC13C	27.7139	-2.6785	2.15835e-06	9.26112e-05
UNC5A	12.8162	1.67858	0.00553511	0.034411
UNC5CL	59.3408	2.34301	0.000207947	0.00311596
UNC93A	7.19362	-2.0401	0.00314591	0.0230395
UPK1B	2008.92	5.31242	7.35866e-09	9.06608e-07
USP17L4	16.3603	-1.72032	0.00454006	0.0298089
USP27X	115.187	-1.26871	0.000247955	0.00355402
USP44	47.583	-1.06496	0.000238228	0.00343423
USP6	182.919	-4.2036	3.35473e-09	4.85688e-07
VAMP8	413.247	1.55274	9.01692e-06	0.000299928
VANGL2	552.547	-1.484	0.000188807	0.0029173
VASH2	74.9188	-2.04789	4.45371e-05	0.000977387
VAT1	1125.72	1.54544	1.14622e-08	1.26247e-06
VAT1L	41.8	3.53853	8.8336e-05	0.00167075
VNN1	942.43	5.34511	1.33841e-13	8.41695e-11
VPS26AP1	11.3761	2.22679	0.000395354	0.00499303
VRK3	682.38	1.11689	2.44093e-05	0.000633007
VSIG4	280.715	1.44357	0.000573518	0.00664832
VSTM4	248.622	-1.23841	0.00210743	0.0173797
VWA1	90.6242	1.26869	0.00316409	0.0230992
VWA2	96.0327	-1.68321	1.30812e-05	0.000395857
VWA5B2	21.0908	-2.05822	1.77095e-05	0.00049914
VWA8	2948.83	-1.1119	0.000197752	0.00301026
VWC2	72.8845	-1.6648	0.00016325	0.00260733
WARS1	2854.45	1.1055	0.00115707	0.0111518
WDR87BP	22.4167	-1.10136	0.00563922	0.0348751
WFDC1	154.914	-1.87584	0.00226267	0.0182721
WFIKKN2	2.63029	-2.61321	0.00485156	0.0312421
WHRN	1347.43	1.13912	0.00449374	0.0296367
WIPI1	1416.56	1.30273	6.8539e-07	3.73788e-05
WNT10A	3.68738	-2.56023	0.000684611	0.00762853
WNT11	8.85516	-2.71666	1.82438e-07	1.27923e-05
WNT2	653.724	-1.18501	0.0058245	0.0357681
WNT5B	168.758	1.24604	0.00525934	0.0331679
WNT7B	14.8949	4.30817	8.93331e-05	0.00168485
XACT	13.9723	6.19322	2.41035e-07	1.6332e-05
XBP1	2804.01	0.995299	0.000222664	0.00328993
XKR8	13.7986	1.09202	0.00368147	0.0256265
XRCC2	33.382	-1.49542	0.00146573	0.0132152
YBX3	1789.23	1.23765	1.45944e-07	1.06297e-05
YBX3P1	37.3319	1.21734	0.000597904	0.00685988
YTHDC1	22.2688	-3.0766	0.00552288	0.0343775
YWHAE	4.57656	2.28792	0.00430187	0.0286658
YWHAZP4	26.7611	-1.23497	0.0058114	0.0357313
ZBTB10	1383.11	1.24089	0.000220264	0.00326405
ZBTB16	1511.74	4.90102	1.80343e-31	3.62921e-27
ZBTB46	87.777	-0.999149	0.000873125	0.00912767
ZBTB7C	54.488	2.10673	1.57667e-06	7.32319e-05
ZC3H12A	140.83	1.47632	4.11471e-05	0.000918572
ZC3HAV1	3743.66	1.37569	0.000439532	0.0054165
ZCCHC12	140.83	-2.97877	9.50347e-05	0.00176428
ZCCHC18	15.5482	-1.56144	0.000137568	0.00229364
ZCRB1P1	13.3629	-1.11897	0.00390134	0.0267498
ZDHHC12	162.615	1.13995	5.87943e-05	0.00121851
ZDHHC14	225.771	0.999512	0.00695545	0.0408318
ZEB1	4681.94	1.08629	3.81197e-07	2.39726e-05
ZFAND2A	87.1041	1.03619	2.7958e-05	0.000695927
ZFP36	1018.24	2.37014	0.000233599	0.00338685
ZFP69B	103.857	-1.33037	2.4063e-08	2.45809e-06
ZG16B	18.1665	2.31742	0.000309796	0.00418693
ZIM2	14.3385	-1.06004	0.00931819	0.0500322
ZMAT4	2.94955	-2.77826	0.00154645	0.013816
ZNF157	15.3556	-1.58144	0.000134855	0.00226153
ZNF232	217.492	-1.11902	0.00048858	0.00586191
ZNF300	403.583	-1.08082	1.18845e-06	5.86184e-05
ZNF322P1	10.6589	-1.75471	0.000943929	0.00961757
ZNF483	182.007	-1.35704	1.76884e-05	0.00049914
ZNF524	13.8654	1.2018	0.00130602	0.0120963
ZNF594	937.23	-1.00866	1.75918e-05	0.000498615
ZNF608	801.036	-1.29415	7.98771e-05	0.00154118
ZNF688	30.5934	1.11942	0.000133765	0.00224716
ZNF695	30.3898	-1.62605	0.00130522	0.0120963
ZNF704	2213.39	-1.63381	1.18625e-05	0.000371263
ZNF713	86.2997	-1.06583	0.00182992	0.0156437
ZNF728	65.3266	-1.45972	0.000851956	0.00896693
ZNF8	5.08495	-1.42719	0.00631736	0.0379834
ZNF827	498.623	-1.00334	1.08256e-05	0.000347456
ZNF850	388.844	-1.05054	0.000222538	0.00328993
ZNF876P	69.9522	-1.29104	0.00143259	0.0129746
ZNF888	2114.7	1.50478	0.00198025	0.0165712
ZNF90	456.26	-1.1994	0.00191416	0.0161783
ZPLD1	12.6138	5.45238	0.000177461	0.00277269
ZSWIM3	201.077	1.58351	0.000312809	0.00421266
